# Supplementary material for: Untargeted and Targeted Metabolomics Reveal the Underlying Mechanism of Aspirin Eugenol Ester Ameliorating Rat Hyperlipidemia via Inhibiting FXR to Induce CYP7A1
Source: Front Pharmacol. 2021 Nov 25;12:733789. doi: 10.3389/fphar.2021.733789 (PMC8656224; doi:10.3389/fphar.2021.733789)
Supplement: Supplementary file 1 [file DataSheet3.xlsx]

## Sheet: Liver Positive
The dataset of the liver samples from hamster in positive mode.
Sample ID	AEE-1	AEE-2	AEE-3	AEE-4	AEE-5	AEE-6	AEE-7	AEE-8	AEE-9	AEE-10	Con-1	Con-2	Con-3	Con-4	Con-5	Con-6	Con-7	Con-8	Con-9	Con-10	Mod-1	Mod-2	Mod-3	Mod-4	Mod-5	Mod-6	Mod-7	Mod-8	Mod-9	Mod-10
Label	AEE	AEE	AEE	AEE	AEE	AEE	AEE	AEE	AEE	AEE	Control	Control	Control	Control	Control	Control	Control	Control	Control	Control	Model	Model	Model	Model	Model	Model	Model	Model	Model	Model
166.086065758104/4.74916666666667	1.3295e+08	1.21192e+08	1.40751e+08	1.18135e+08	122870946	1.23782e+08	1.09495e+08	1.29755e+08	1.08399e+08	1.39033e+08	1.32217e+08	1.57492e+08	1.17665e+08	1.63383e+08	1.27609e+08	1.51659e+08	140508258	1.43252e+08	1.05464e+08	1.23382e+08	1.14254e+08	1.09191e+08	1.22321e+08	101635861	8.77733e+07	9.03916e+07	9.91761e+07	1.00894e+08	9.74909e+07	8.6538e+07
496.341339166092/16.104	6.66026e+07	6.80249e+07	9.98545e+07	8.5425e+07	6.80171e+07	5.96313e+07	6.16933e+07	8.1037e+07	6.43551e+07	6.0861e+07	5.75659e+07	4.17256e+07	1.01972e+08	5.70712e+07	5.03324e+07	4.9039e+07	6.71342e+07	6.05986e+07	5.60063e+07	4.95315e+07	7.61895e+07	6.44547e+07	6.96583e+07	7.10335e+07	7.67656e+07	6.99491e+07	6.32899e+07	6.47837e+07	6.68127e+07	6.8895e+07
524.372557744067/18.488	6.75597e+07	7.50697e+07	7.15039e+07	6.96903e+07	5.74308e+07	5.51878e+07	4.84141e+07	5.6388e+07	5.08361e+07	5.95782e+07	4.3405e+07	4.00581e+07	8.01334e+07	4.11971e+07	4.56658e+07	4.90548e+07	5.72686e+07	4.68419e+07	5.21491e+07	4.29067e+07	6.94102e+07	6.4896e+07	6.20212e+07	6.65081e+07	7.10923e+07	7.33082e+07	6.11109e+07	5.96754e+07	5.91222e+07	6.34403e+07
522.356951710337/16.7276666666667	6.97755e+07	7.90681e+07	7.95561e+07	7.06969e+07	4.93313e+07	5.47825e+07	5.46078e+07	6.27707e+07	6.03032e+07	6.71379e+07	2.75219e+07	2.57917e+07	6.32449e+07	21817767	3.60451e+07	4.20045e+07	57683750	3.10573e+07	2.53912e+07	2.96393e+07	7.48366e+07	6.39271e+07	4.84289e+07	7.90996e+07	6.42224e+07	6.3005e+07	4.77321e+07	4.94179e+07	5.33051e+07	42298372
991.673970998059/16.1069166666667	3.56651e+07	3.68673e+07	5.94647e+07	4.75112e+07	3.7791e+07	3.01462e+07	3.06953e+07	4.3721e+07	3.0738e+07	3.03791e+07	2.77466e+07	1.63372e+07	6.95514e+07	2.74035e+07	2.28172e+07	2.22119e+07	3.59485e+07	3.01177e+07	2.67921e+07	2.24459e+07	4.01569e+07	3.31179e+07	3.54936e+07	3.67828e+07	4.17596e+07	3.70107e+07	3.06716e+07	3.29763e+07	3.47198e+07	3.687e+07
132.101906606019/2.56583333333333	2.25926e+08	2.0021e+08	2.43744e+08	1.93633e+08	2.11113e+08	2.07696e+08	1.81197e+08	2.35246e+08	1.74537e+08	2.5386e+08	2.33689e+08	2.83879e+08	2.02136e+08	2.97673e+08	2.26766e+08	2.69297e+08	2.47852e+08	2.61451e+08	1.64055e+08	2.16677e+08	1.81469e+08	1.74486e+08	2.00037e+08	1.5576e+08	8.48437e+07	1.39585e+08	1.54375e+08	8.74726e+07	160234581	1.25238e+08
274.27443175045/11.493	2.86265e+07	3.16469e+07	3.25951e+07	3.41454e+07	3.01262e+07	3.29033e+07	3.06885e+07	2.80547e+07	3.15418e+07	3.11178e+07	3.99352e+07	4.60628e+07	4.43239e+07	4.29587e+07	4.72343e+07	4.3198e+07	4.4552e+07	3.8232e+07	4.86182e+07	4.5741e+07	3.45882e+07	2.61755e+07	3.10484e+07	2.95278e+07	3.67286e+07	2.67101e+07	3.18917e+07	2.69494e+07	3.00556e+07	3.2148e+07
205.096936979834/5.766	4.3264e+07	3.7051e+07	4.36178e+07	3.2203e+07	3.49335e+07	3.77996e+07	3.12884e+07	4.09248e+07	3.25577e+07	4.53177e+07	3.82102e+07	4.90486e+07	2.81534e+07	5.02792e+07	3.80345e+07	5.01785e+07	4.39427e+07	4.51704e+07	2.73884e+07	3.48976e+07	3.66883e+07	3.53677e+07	41085366	3.08736e+07	2.50923e+07	2.6431e+07	2.905e+07	3.20218e+07	2.95813e+07	2.45292e+07
544.341260113673/15.4088333333333	3.57421e+07	3.88747e+07	3.66161e+07	3.74064e+07	3.05794e+07	3.53308e+07	3.52962e+07	2.8818e+07	3.22681e+07	3.40598e+07	1.98103e+07	1.95531e+07	2.57477e+07	1.69003e+07	2.14035e+07	2.35421e+07	2.74322e+07	1.80526e+07	2.00324e+07	2.04542e+07	3.55633e+07	3.64398e+07	3.05356e+07	3.35256e+07	4.27693e+07	3.86107e+07	2.93104e+07	3.22821e+07	3.64115e+07	2.91837e+07
482.325476439265/18.4018333333333	3.58023e+07	3.59644e+07	6.06392e+07	4.46216e+07	3.37173e+07	2.72251e+07	2.73714e+07	5.2192e+07	2.60437e+07	3.24709e+07	3.27919e+07	3.00749e+07	5.34201e+07	3.77337e+07	2.95926e+07	2.89426e+07	3.00308e+07	3.31718e+07	2.85225e+07	2.94525e+07	4.25762e+07	3.7732e+07	3.63816e+07	3.70769e+07	3.867e+07	3.59517e+07	3.18631e+07	3.08317e+07	3.21245e+07	3.32345e+07
520.341215912177/15.353	3.04934e+07	2.9773e+07	4.00131e+07	3.54589e+07	2.58934e+07	2.56731e+07	2.5298e+07	2.67249e+07	2.94122e+07	1.46673e+07	2.76507e+07	3.38205e+07	6.37202e+07	2.50101e+07	3.37738e+07	4.06903e+07	5.90008e+07	29386343	2.84149e+07	3.11159e+07	4.11104e+07	3.31411e+07	2.45946e+07	3.81692e+07	2.98265e+07	2.71243e+07	2.64269e+07	2.20157e+07	2.40396e+07	2.16038e+07
526.29406775651/15.2701666666667	2.30566e+07	2.46632e+07	2.36143e+07	2.78249e+07	2.65736e+07	2.33028e+07	2.4391e+07	1.98308e+07	2.01221e+07	1.86351e+07	3.03474e+07	2.61814e+07	2.66478e+07	2.60415e+07	2.68737e+07	2.47641e+07	2.16224e+07	2.50129e+07	2.34358e+07	2.87474e+07	2.31818e+07	2.44193e+07	2.28774e+07	2.05614e+07	2.78824e+07	2.47997e+07	2.05839e+07	2.53864e+07	2.7755e+07	2.41802e+07
120.080921968943/4.7495	5.20358e+07	4.72063e+07	5.47618e+07	4.51059e+07	4.79708e+07	4.87903e+07	4.25845e+07	5.0565e+07	4.28891e+07	5.51121e+07	5.70874e+07	6.77552e+07	5.02147e+07	7.1606e+07	5.48067e+07	6.61066e+07	6.06403e+07	5.91788e+07	4.32805e+07	5.24415e+07	4.40619e+07	4.37205e+07	4.90902e+07	4.06975e+07	3.58338e+07	3.77484e+07	4.18183e+07	4.26978e+07	4.12325e+07	3.44545e+07
123.055453875241/1.888	1.56156e+07	1.62641e+07	1.6566e+07	1.93086e+07	1.95615e+07	1.8366e+07	1.62934e+07	1.31227e+07	1.76093e+07	1.55728e+07	1.93317e+07	1.61937e+07	1.90713e+07	1.6964e+07	1.79586e+07	1.53752e+07	1.56522e+07	1.45956e+07	1.78194e+07	1.61974e+07	1.444e+07	1.39854e+07	1.63735e+07	17424553	1.80562e+07	1.59589e+07	1.45208e+07	1.55298e+07	1.36619e+07	1.52009e+07
454.294049841828/16.0206666666667	2.50387e+07	1.991e+07	4.90937e+07	28194979	2.23808e+07	1.48508e+07	1.54338e+07	4.75039e+07	1.60625e+07	2.71105e+07	2.53133e+07	1.82288e+07	3.89279e+07	3.11829e+07	1.74123e+07	1.78052e+07	1.8932e+07	2.38604e+07	1.67946e+07	2.05804e+07	2.8434e+07	2.12903e+07	1.89593e+07	1.91846e+07	2.0381e+07	1.98784e+07	1.70623e+07	1.64477e+07	1.65898e+07	1.74004e+07
188.070323524606/5.766	2.98782e+07	2.54009e+07	2.96839e+07	2.20388e+07	2.40909e+07	2.61538e+07	2.15175e+07	2.82103e+07	2.28296e+07	3.20511e+07	2.8688e+07	3.63105e+07	2.09059e+07	3.80195e+07	28145687	3.76936e+07	3.28152e+07	3.26293e+07	1.99996e+07	2.60037e+07	2.55984e+07	2.48274e+07	2.88429e+07	2.18106e+07	1.8098e+07	1.9418e+07	2.14099e+07	2.38508e+07	2.2014e+07	1.81165e+07
132.101933215118/2.20116666666667	8.68885e+07	8.03835e+07	9.2027e+07	7.50229e+07	8.40409e+07	1.13208e+07	7.02661e+07	8.88253e+07	4.89247e+07	1.10394e+07	8.42439e+07	8.40306e+07	7.52953e+07	1.22906e+08	8.57629e+07	8.09638e+07	8.54768e+07	8.60665e+07	6.29688e+07	8.35749e+07	7.50771e+07	5.00302e+07	1.0608e+07	6.57657e+07	3.67489e+07	9.87147e+06	6.29713e+07	7.79204e+07	7.11546e+07	5.37061e+07
520.341173389178/15.02475	2.19822e+07	2.80478e+07	2.13068e+07	2.56412e+07	1.55036e+07	2.40878e+07	1.88828e+07	1.13126e+07	2.32786e+07	7.01149e+06	1.09465e+07	1.46166e+07	3.00804e+07	8.59426e+06	1.53228e+07	2.47383e+07	4.41525e+07	1.08447e+07	1.23446e+07	1.41715e+07	3.93294e+07	3.09925e+07	2.07774e+07	3.24806e+07	3.12699e+07	2.4983e+07	2.03319e+07	2.02762e+07	2.19559e+07	1.84022e+07
300.290166074647/13.7355	3.34104e+07	3.57191e+07	3.07285e+07	3.78578e+07	3.00093e+07	3.17167e+07	3.42353e+07	2.64473e+07	2.62992e+07	2.67755e+07	2.40284e+07	2.45616e+07	2.19275e+07	2.42193e+07	2.00738e+07	2.84267e+07	2.31011e+07	1.58773e+07	2.20947e+07	2.39104e+07	3.68272e+07	3.42928e+07	3.04776e+07	2.95279e+07	2.8061e+07	2.74196e+07	2.93894e+07	3.55642e+07	3.06521e+07	2.66314e+07
396.801665515093/8.10166666666667	1.23821e+07	1.64705e+07	1.52201e+07	1.62941e+07	1.70168e+07	1.24412e+07	1.41889e+07	1.59912e+07	1.1921e+07	1.72356e+07	1.69367e+07	1.50564e+07	1.33565e+07	1.56697e+07	1.71201e+07	1.56171e+07	1.22046e+07	1.46949e+07	1.46878e+07	2.48395e+07	1.75554e+07	1.62123e+07	1.56258e+07	2.20717e+07	1.43647e+07	2.67496e+07	1.81697e+07	2.20418e+07	1.8241e+07	1.49818e+07
570.35698585377/16.4395	3.97756e+07	3.38613e+07	2.34298e+07	2.73613e+07	2.97364e+07	2.71151e+07	2.73531e+07	3.07817e+07	1.90622e+07	4.36749e+07	7.19647e+06	6.20799e+06	1.03445e+07	8.21682e+06	7.96736e+06	1.12515e+07	1.14533e+07	1.28378e+07	8.46621e+06	1.10704e+07	2.27503e+07	2.96466e+07	2.29019e+07	2.02432e+07	2.03161e+07	3.09797e+07	1.68379e+07	2.86962e+07	2.44587e+07	1.49238e+07
522.357072332043/16.3525	2.82884e+07	3.28514e+07	2.66318e+07	2.89581e+07	1.67104e+07	2.85785e+07	2.33118e+07	1.7483e+07	3.62327e+07	1.71722e+07	4.43621e+06	4.88682e+06	1.57368e+07	3.58891e+06	6.0556e+06	1.2871e+07	2.18009e+07	5.5942e+06	5.37662e+06	6.70251e+06	5.29715e+07	3.70228e+07	2.57381e+07	3.51335e+07	3.67578e+07	3.14429e+07	2.36694e+07	2.51728e+07	2.5987e+07	2.46643e+07
992.677315483444/16.104	2.01749e+07	2.08997e+07	3.3957e+07	2.70822e+07	2.13751e+07	1.70227e+07	1.72643e+07	2.48621e+07	1.73936e+07	1.71771e+07	1.53556e+07	9.01514e+06	3.82889e+07	1.52526e+07	1.24833e+07	1.22329e+07	2.00301e+07	1.6613e+07	1.46996e+07	1.22763e+07	2.2628e+07	1.85249e+07	1.99576e+07	2.06256e+07	2.34638e+07	2.03365e+07	1.71235e+07	1.84298e+07	1.92209e+07	2.07334e+07
496.341330089895/15.7268333333333	1.99979e+07	1.97158e+07	3.35844e+07	2.63773e+07	1.98839e+07	1.71062e+07	1.69799e+07	2.44918e+07	1.78194e+07	1.76437e+07	1.42387e+07	9.23327e+06	3.92337e+07	1.44799e+07	1.22749e+07	1.23195e+07	2.04389e+07	1.59e+07	1.45946e+07	1.20285e+07	2.16373e+07	1.81793e+07	2.0314e+07	2.12641e+07	2.32323e+07	2.0831e+07	1.6802e+07	1.82727e+07	1.90693e+07	1.9927e+07
150.058226814881/1.84891666666667	1.60513e+07	1.42155e+07	1.9135e+07	1.49433e+07	1.62047e+07	1.47367e+07	1.42768e+07	1.73635e+07	1.26939e+07	1.65399e+07	1.62812e+07	1.79066e+07	1.42756e+07	1.92255e+07	1.53471e+07	1.51554e+07	1.35748e+07	2.02366e+07	1.41633e+07	1.56667e+07	1.08219e+07	1.14718e+07	1.17666e+07	9.74807e+06	8.32555e+06	8.96942e+06	9.22108e+06	1.00942e+07	9.06098e+06	7.94807e+06
544.341262403488/15.1185833333333	1.65686e+07	2.38238e+07	1.57555e+07	1.88023e+07	1.17162e+07	2.11701e+07	1.6501e+07	8.61438e+06	1.80772e+07	1.12416e+07	5.16339e+06	6.12428e+06	1.29469e+07	4.08026e+06	6.88349e+06	1.00326e+07	1.89133e+07	4.68739e+06	6.23679e+06	6.04335e+06	2.59962e+07	2.13101e+07	1.78965e+07	2.20491e+07	2.97819e+07	2.27238e+07	16362540	1.84901e+07	1.99716e+07	1.70937e+07
328.139476198686/4.91566666666667	2.91414e+07	2.61474e+07	1.60379e+07	1.65823e+07	2.97052e+07	2.7007e+07	3.0197e+07	3.2387e+07	2.94123e+07	3.26961e+07	3.2924e+07	3.55484e+07	3.12381e+07	2.91652e+07	3.22778e+07	4.65981e+07	4.16684e+07	3.39296e+07	2.89313e+07	3.06528e+07	2.23578e+07	2.63692e+07	2.48822e+07	2.78292e+07	2.80323e+07	2.49058e+07	2.13693e+07	33539060	2.46336e+07	1.83918e+07
497.344680432867/16.1038333333333	1.9353e+07	1.97264e+07	2.90482e+07	2.48146e+07	1.9733e+07	1.73125e+07	1.7349e+07	2.35178e+07	1.7812e+07	1.76383e+07	1.6339e+07	11588282	2.94125e+07	1.6269e+07	1.42991e+07	1.39153e+07	1.92786e+07	1.7297e+07	1.58945e+07	1.40408e+07	2.20143e+07	1.95531e+07	2.01421e+07	2.05773e+07	2.22453e+07	2.01812e+07	1.82314e+07	1.86446e+07	2.02138e+07	1.99449e+07
679.513507340459/7.90933333333333	8.22474e+06	11164337	9.96313e+06	1.02831e+07	1.18596e+07	8.77972e+06	9.00796e+06	1.11462e+07	7.93955e+06	1.22272e+07	1.23997e+07	1.08071e+07	9.69379e+06	1.20205e+07	1.26024e+07	1.13232e+07	9.23049e+06	1.04691e+07	1.01027e+07	1.69845e+07	1.06396e+07	9.97981e+06	9.49645e+06	1.38974e+07	8.9918e+06	1.74175e+07	1.07671e+07	1.46467e+07	1.15791e+07	9.27624e+06
480.309859970486/16.6243333333333	1.41851e+07	1.40842e+07	3.53198e+07	2.1108e+07	1.18183e+07	1.079e+07	1.1204e+07	2.50761e+07	1.47958e+07	1.79536e+07	9.23626e+06	1.04617e+07	3.03655e+07	1.21861e+07	9.88773e+06	1.13225e+07	1.53048e+07	9.9725e+06	1.14887e+07	1.05129e+07	1.82302e+07	1.17617e+07	1.23873e+07	1.88254e+07	1.5299e+07	1.2452e+07	1.04224e+07	8.07803e+06	8.33773e+06	9.94918e+06
340.260077674828/7.90416666666667	8.07036e+06	1.05511e+07	9.33553e+06	9.36806e+06	1.07906e+07	7.54155e+06	8.32623e+06	1.02167e+07	6.99264e+06	1.08611e+07	1.02275e+07	8.57842e+06	7.75493e+06	9.37616e+06	1.02409e+07	8.84309e+06	6.82983e+06	8.50687e+06	8.95124e+06	1.47537e+07	1.0775e+07	9.94671e+06	8.92712e+06	1.39181e+07	8.61632e+06	1.77657e+07	1.09745e+07	1.41515e+07	1.15095e+07	9.31143e+06
453.343224556535/8.26716666666667	7.34939e+06	1.04698e+07	9.56496e+06	1.03627e+07	9.86462e+06	6.89173e+06	8.86203e+06	1.02125e+07	7.08848e+06	1.07564e+07	1.06862e+07	9.72108e+06	7.47051e+06	9.83831e+06	1.06335e+07	9.50578e+06	6.94896e+06	9.19569e+06	8.4454e+06	1.6642e+07	1.13487e+07	9.43257e+06	9.53433e+06	1.35849e+07	8.1525e+06	1.66123e+07	1.08667e+07	1.3565e+07	1.09952e+07	8.94614e+06
524.372683601023/18.0383333333333	1.64496e+07	1.78642e+07	2.08939e+07	1.90589e+07	1.34179e+07	1.18124e+07	9.87996e+06	1.36174e+07	1.06334e+07	1.68527e+07	9.30104e+06	8.79315e+06	2.56906e+07	8.88161e+06	1.22665e+07	1.19069e+07	1.52932e+07	1.06631e+07	1.32136e+07	9.25888e+06	1.6869e+07	1.54324e+07	1.43618e+07	1.66925e+07	1.85686e+07	1.87044e+07	1.44388e+07	1.37386e+07	1.35579e+07	1.50725e+07
220.117783776393/5.19941666666667	1.05121e+07	1.16778e+07	1.28244e+07	1.27057e+07	1.5248e+07	1.17291e+07	1.10969e+07	1.04651e+07	1.11507e+07	1.16776e+07	1.30058e+07	1.50861e+07	1.76368e+07	1.52466e+07	1.61487e+07	1.3117e+07	1.2664e+07	1.10034e+07	1.3293e+07	1.41013e+07	1.05184e+07	9.2972e+06	1.2754e+07	1.18936e+07	1.33072e+07	1.36179e+07	1.13485e+07	1.05344e+07	1.1223e+07	9.97742e+06
525.375971638133/18.488	2.0656e+07	2.29475e+07	2.19114e+07	2.13115e+07	1.7522e+07	1.68229e+07	1.46548e+07	1.71685e+07	1.54407e+07	1.85007e+07	1.33256e+07	1.22845e+07	2.34869e+07	1.25744e+07	1.40101e+07	1.50255e+07	1.76483e+07	1.43881e+07	1.59644e+07	1.31246e+07	2.15814e+07	2.0139e+07	1.92022e+07	2.06836e+07	2.21192e+07	2.2659e+07	1.89948e+07	1.85143e+07	1.79158e+07	1.9722e+07
568.341186107631/15.0895833333333	1.07916e+07	1.31956e+07	7.08481e+06	8.87357e+06	1.16549e+07	1.288e+07	9.927e+06	7.2695e+06	8.64104e+06	6.93761e+06	1.10052e+07	8.40257e+06	1.15577e+07	8.49822e+06	1.02304e+07	1.39827e+07	1.48155e+07	9.31961e+06	7.75115e+06	1.12212e+07	1.13943e+07	1.35218e+07	1.15221e+07	9.58637e+06	1.32897e+07	1.37797e+07	8.93251e+06	1.45386e+07	1.36625e+07	9.32132e+06
528.31008485261/16.35425	1.8696e+07	1.71604e+07	1.62344e+07	2.25067e+07	1.79371e+07	1.41912e+07	1.70021e+07	1.67863e+07	1.13746e+07	2.33443e+07	5.61711e+06	6.0849e+06	8.03095e+06	6.80641e+06	6.15881e+06	5.8505e+06	4.61665e+06	7.85198e+06	6.31128e+06	8.4193e+06	1.09645e+07	1.33235e+07	1.53466e+07	1.14918e+07	1.14783e+07	1.48304e+07	1.11492e+07	1.5567e+07	1.47736e+07	1.40941e+07
523.360591919571/16.7323333333333	2.13444e+07	2.39994e+07	2.435e+07	2.11642e+07	1.50014e+07	1.66557e+07	1.65585e+07	1.92089e+07	1.84045e+07	2.0272e+07	8.10869e+06	7.56412e+06	1.90064e+07	6.25997e+06	1.05789e+07	1.24469e+07	1.73027e+07	9.15053e+06	7.48264e+06	8.76394e+06	2.24577e+07	1.92292e+07	1.44514e+07	1.98783e+07	1.93681e+07	1.89854e+07	1.43352e+07	1.4787e+07	1.60325e+07	1.26577e+07
792.597591613076/8.11566666666667	7.02518e+06	9.43333e+06	8.66409e+06	9.42504e+06	1.00889e+07	7.52506e+06	8.07222e+06	9.44573e+06	7.01026e+06	1.04867e+07	1.07766e+07	9.72088e+06	8.41296e+06	1.04482e+07	1.07161e+07	1.01424e+07	8.27998e+06	9.33234e+06	8.77993e+06	1.59327e+07	9.29648e+06	8.38357e+06	8.38848e+06	1.16839e+07	7.56922e+06	1.47517e+07	9.37967e+06	1.2227e+07	9.51586e+06	7.63382e+06
931.626464093206/10.8406666666667	1.08699e+07	2.58371e+06	2.20922e+06	6.66838e+06	2.50003e+07	5.84577e+06	3.40974e+06	9.85132e+06	4.29167e+06	1.9704e+07	5.28516e+06	1.195e+07	8.48771e+06	4.77357e+06	1.29555e+07	8.37934e+06	6.43408e+06	6.37589e+06	1.32217e+07	4.59724e+06	2.72034e+06	420121	3.27935e+06	2.58221e+06	5.43052e+06	2.12921e+07	6.95408e+06	1.36966e+07	1.68332e+06	1.52773e+06
502.294526084574/15.3195833333333	1.00309e+07	1.04115e+07	1.39116e+07	1.32801e+07	8.48875e+06	9.77131e+06	1.11094e+07	9.54594e+06	1.15224e+07	1.18047e+07	4.86462e+06	7.00466e+06	5.58492e+06	6.05364e+06	6.58164e+06	5.23259e+06	3.66548e+06	4.90233e+06	7.22591e+06	6.00507e+06	1.12254e+07	8.86065e+06	1.20391e+07	1.20148e+07	1.15553e+07	1.00759e+07	1.04504e+07	9.46371e+06	1.01028e+07	1.30586e+07
397.303377832217/8.10166666666667	6.10541e+06	8.12682e+06	7.51895e+06	8.01306e+06	8.38128e+06	6.12549e+06	6.95334e+06	7.87958e+06	5.86501e+06	8.47911e+06	8.40321e+06	7.41908e+06	6.62925e+06	7.76188e+06	8.39677e+06	7.77041e+06	6.045e+06	7.30524e+06	7.26705e+06	1.23098e+07	8.67402e+06	7.98258e+06	7.7071e+06	1.0736e+07	7.07992e+06	1.3201e+07	8.95743e+06	1.09462e+07	9.01161e+06	7.36019e+06
545.344859052615/15.4088333333333	1.15219e+07	1.25635e+07	1.18277e+07	1.21023e+07	9.84945e+06	1.14262e+07	1.13961e+07	9.29227e+06	1.04157e+07	1.09997e+07	6.33789e+06	6.25248e+06	8.24913e+06	5.34903e+06	6.85616e+06	7.55047e+06	8.78832e+06	5.74111e+06	6.4116e+06	6.53148e+06	1.14884e+07	1.17934e+07	9.87344e+06	1.08642e+07	1.39599e+07	1.25768e+07	9.46119e+06	1.04329e+07	1.18627e+07	9.42495e+06
963.642725461677/18.3858333333333	9.41545e+06	9.75629e+06	2.07114e+07	1.35423e+07	8.81314e+06	6.33634e+06	6.12786e+06	1.67209e+07	5.64436e+06	8.26711e+06	8.48392e+06	7.47548e+06	1.76285e+07	1.0651e+07	7.47684e+06	7.09522e+06	7.56461e+06	8.88665e+06	7.11357e+06	7.04168e+06	1.25916e+07	1.07948e+07	9.97308e+06	1.0348e+07	1.09485e+07	9.66901e+06	8.02188e+06	7.64004e+06	8.09545e+06	8.37067e+06
782.570312354579/21.65	0	0	344250	417157	2.41407e+07	2.43848e+07	5.41829e+07	37496738	3.98453e+07	5.26381e+07	1.63287e+07	8.67833e+07	2.97333e+07	4.38704e+07	9.09301e+06	1.69798e+07	3.72739e+07	0	138721	1.35817e+07	0	0	307442	501606	2.32344e+07	4.49166e+07	3.72354e+07	4.89968e+07	4.36695e+07	3.30245e+07
478.294175268689/15.2540833333333	7.86212e+06	7.51653e+06	1.59707e+07	1.43056e+07	5.87556e+06	5.70587e+06	6.2632e+06	7.23699e+06	8.10158e+06	3.18321e+06	6.33996e+06	1.04882e+07	2.21595e+07	5.10587e+06	1.00754e+07	1.19724e+07	1.79904e+07	5.58872e+06	8.59386e+06	8.10632e+06	1.2947e+07	7.78216e+06	7.47285e+06	1.28234e+07	8.93608e+06	6.9507e+06	6.16483e+06	5.30113e+06	6.1437e+06	6.53448e+06
294.155106121444/3.30366666666667	5.18796e+07	2.48404e+07	6.57078e+06	9.55144e+06	2.09706e+07	2.67731e+07	1.92935e+07	1.72245e+07	6.97253e+07	2.80224e+07	1.54407e+07	1.67315e+07	1.64054e+07	1.17713e+07	1.72736e+07	3.44359e+07	32080095	25864571	1.49709e+07	1.59672e+07	3.43149e+07	4.13371e+07	30093299	4.37083e+07	2.94986e+07	4.11894e+07	3.22035e+07	4.32714e+07	3.32107e+07	4.00949e+07
644.378516602427/17.5195833333333	1.4608e+07	1.37559e+07	2.33493e+07	1.40508e+07	1.55264e+07	1.04422e+07	1.05438e+07	2.39684e+07	1.72474e+07	1.59976e+07	1.122e+07	1.081e+07	2.23664e+07	1.21237e+07	1.26067e+07	1.52919e+07	2.93329e+07	1.59254e+07	8.80186e+06	1.17379e+07	1.33875e+07	1.27563e+07	1.23292e+07	1.43964e+07	1.6643e+07	1.82373e+07	1.20397e+07	1.15753e+07	1.1614e+07	1.45648e+07
521.344779723983/15.3561666666667	9.06451e+06	8.83267e+06	1.19882e+07	1.0616e+07	7.09197e+06	7.6213e+06	7.46657e+06	7.93162e+06	8.75656e+06	4.32071e+06	8.24367e+06	1.00995e+07	1.91706e+07	7.44174e+06	1.0112e+07	1.22167e+07	1.78322e+07	8.76405e+06	8.50628e+06	9.31668e+06	1.19217e+07	9.9243e+06	7.32622e+06	1.15539e+07	8.98083e+06	8.15057e+06	7.93096e+06	6.58044e+06	7.20362e+06	6.46676e+06
150.058331210566/1.38175	1.1408e+07	1.02251e+07	1.24692e+07	1.00644e+07	1.06669e+07	1.02781e+07	9.91518e+06	1.17376e+07	8.97156e+06	1.20375e+07	1.02916e+07	1.09968e+07	9.00956e+06	1.14547e+07	9.35827e+06	1.0044e+07	9.34601e+06	1.27214e+07	8.43721e+06	1.03034e+07	9.23532e+06	8.81728e+06	9.32303e+06	7.45073e+06	6.65838e+06	6.90684e+06	7.57247e+06	7.81792e+06	7.35004e+06	6.13313e+06
522.35732033943/16.9671666666667	1.9996e+07	1.88676e+07	3.23398e+07	2.46346e+07	1.50387e+07	1.4102e+07	1.34975e+07	1.61413e+07	1.84912e+07	1.3324e+07	2.9164e+06	3.36693e+06	1.45621e+07	2.53688e+06	3.3992e+06	5.018e+06	9.83645e+06	7.05321e+06	3.88824e+06	3.90408e+06	2.27493e+07	1.79758e+07	1.46001e+07	2.09626e+07	2.22952e+07	1.83112e+07	1.44281e+07	1.31341e+07	1.35023e+07	1.28465e+07
758.570820958646/21.339	0	0	0	341995	33428424	2.80334e+07	2.66028e+07	3.91208e+07	2.71433e+07	2.67979e+07	1.83948e+07	2.39622e+07	4.57384e+07	2.17952e+07	2.25069e+06	3.81697e+07	3.56867e+07	0	0	6.51738e+06	0	0	0	164580	3.14974e+07	2.64749e+07	2.27074e+07	3.83332e+07	2.48516e+07	2.14856e+07
118.086627609074/1.29983333333333	1.29969e+07	1.22431e+07	1.64727e+07	1.26719e+07	1.44423e+07	1.18711e+07	1.37033e+07	1.54224e+07	1.13436e+07	1.43169e+07	1.10163e+07	2.73635e+07	1.73782e+07	1.21981e+07	2.31476e+07	1.09743e+07	9.87676e+06	1.42583e+07	1.16688e+07	1.12503e+07	8.46201e+06	9.5606e+06	1.0495e+07	9.44287e+06	8.61237e+06	1.30857e+07	7.85551e+06	1.1159e+07	1.11324e+07	8.52943e+06
527.297752710065/15.2701666666667	7.23889e+06	7.74828e+06	7.41061e+06	8.75913e+06	8.34389e+06	7.2527e+06	7.6334e+06	6.1964e+06	6.29393e+06	5.83029e+06	9.58732e+06	8.25633e+06	8.38835e+06	8.18848e+06	8.47218e+06	7.80849e+06	6.80431e+06	7.85652e+06	7.33329e+06	9.04955e+06	7.24793e+06	7.66752e+06	7.17784e+06	6.42575e+06	8.77552e+06	7.77574e+06	6.46295e+06	7.9611e+06	8.71065e+06	7.5904e+06
758.570801769966/21.0781666666667	0	0	0	284802	1.77092e+07	3.92173e+07	2.09566e+07	2.34144e+07	3.67154e+07	4.77946e+07	7.32012e+07	4.13849e+07	2.28875e+07	2.28668e+07	1.50243e+06	1.43423e+07	1.18324e+07	0	0	763483	0	0	0	128387	2.94548e+07	1.89612e+07	1.29978e+07	1.89869e+07	1.43469e+07	1.40103e+07
147.112136143363/1.06833333333333	7.53131e+06	7.39237e+06	8.14869e+06	7.35332e+06	7.26296e+06	7.35541e+06	6.39122e+06	7.58623e+06	6.20501e+06	7.93902e+06	7.78374e+06	8.95244e+06	1.29119e+06	9.38937e+06	7.84733e+06	8.03922e+06	7.86063e+06	7.73212e+06	6.14939e+06	7.14385e+06	6.64825e+06	6.34793e+06	7.46339e+06	5.81675e+06	4.89147e+06	5.34541e+06	6.16694e+06	5.8743e+06	5.7764e+06	4.66548e+06
510.357566849677/17.255	8.68384e+06	9.16347e+06	1.45518e+07	1.2054e+07	6.79235e+06	6.80784e+06	6.7678e+06	7.82255e+06	7.09945e+06	6.01768e+06	4.32265e+06	5.39739e+06	2.13596e+07	5.84142e+06	6.42862e+06	7.2476e+06	1.12511e+07	5.57849e+06	8.03265e+06	4.68747e+06	9.21901e+06	7.13495e+06	9.21997e+06	1.01634e+07	1.19812e+07	9.16123e+06	6.18503e+06	5.89544e+06	7.16791e+06	7.35226e+06
86.0970105599736/2.56541666666667	5.14841e+07	4.50426e+07	5.46028e+07	4.36593e+07	4.73942e+07	4.6554e+07	4.10733e+07	5.31114e+07	4.0602e+07	5.79636e+07	5.39527e+07	6.78605e+07	4.73384e+07	7.11536e+07	5.35154e+07	6.53353e+07	5.93052e+07	5.99144e+07	3.82192e+07	5.03212e+07	3.97496e+07	3.87895e+07	4.51757e+07	3.51853e+07	1.72375e+07	3.28158e+07	3.67407e+07	2.08194e+07	3.80051e+07	2.99337e+07
308.09189843947/1.86866666666667	1.5314e+06	8.97832e+06	2.85833e+06	1.34369e+07	5.30563e+06	1.05274e+07	8.03232e+06	373906	1.0341e+07	2.80012e+06	371007	2.18004e+06	4.96073e+06	157666	4.77151e+06	3.76192e+06	4.481e+06	635223	3.10852e+06	439856	1.1278e+07	3.55324e+06	1.0871e+07	1.14286e+07	1.31449e+07	7.90389e+06	1.15793e+07	5.42447e+06	8.95629e+06	1.30321e+07
483.328976657695/18.388	9.59061e+06	9.6448e+06	1.64098e+07	1.20068e+07	9.00835e+06	7.22565e+06	7.27844e+06	1.40869e+07	6.95885e+06	8.69312e+06	8.85317e+06	8.0718e+06	1.45491e+07	1.02043e+07	7.94083e+06	7.79634e+06	8.08048e+06	8.92519e+06	7.657e+06	7.88601e+06	1.15081e+07	1.01871e+07	9.83289e+06	1.00619e+07	1.04624e+07	9.74912e+06	8.64518e+06	8.35491e+06	8.70333e+06	8.98108e+06
116.070985236319/1.33766666666667	1.08567e+07	5.40665e+06	1.62763e+07	1.49817e+07	5.76739e+06	5.73355e+06	1.37427e+07	6.37935e+06	4.68763e+06	1.23187e+07	6.40741e+06	8.01734e+06	5.90492e+06	7.57005e+06	7.07333e+06	1.25201e+07	1.25648e+07	8.35162e+06	6.80114e+06	6.11059e+06	7.57456e+06	4.48193e+06	1.04894e+07	9.01743e+06	3.83711e+06	3.80639e+06	7.42679e+06	4.18398e+06	4.07436e+06	3.50495e+06
482.325788896149/17.92	6.79445e+06	6.84223e+06	1.78793e+07	1.09301e+07	6.76581e+06	4.68798e+06	4.86283e+06	1.41256e+07	4.33109e+06	6.53275e+06	6.72684e+06	6.44986e+06	1.64808e+07	9.05556e+06	6.27829e+06	6.51604e+06	6.57566e+06	6.65873e+06	5.62006e+06	5.9096e+06	9.14802e+06	7.69211e+06	7.47235e+06	7.64892e+06	8.23402e+06	7.58561e+06	6.3064e+06	5.83115e+06	6.29031e+06	6.81615e+06
304.3006408954/14.2895	8.09281e+06	9.28857e+06	5.97813e+06	6.45398e+06	7.6842e+06	9.65137e+06	9.05245e+06	1.78321e+07	7.98773e+06	1.32437e+07	7.72705e+06	4.90323e+06	7.40797e+06	4.2358e+06	7.13906e+06	8.22627e+06	6.83927e+06	4.55899e+06	4.52763e+06	5.71365e+06	3.63374e+06	3.56604e+06	4.52136e+06	4.51057e+06	4.09339e+06	5.17516e+06	6.13645e+06	8.56279e+06	4.70642e+06	6.94209e+06
280.139567999473/1.8335	5.97116e+06	5.6169e+06	2.68131e+06	3.55821e+06	6.28972e+06	6.52471e+06	5.23259e+06	4.96281e+06	6.94697e+06	6.78677e+06	5.71259e+06	6.76091e+06	4.93082e+06	5.56837e+06	6.11676e+06	1.01303e+07	8.95878e+06	8.54672e+06	6.58799e+06	5.41503e+06	4.57819e+06	5.85894e+06	5.36572e+06	6.02744e+06	5.99406e+06	5.57519e+06	4.83759e+06	6.28239e+06	5.14849e+06	3.70599e+06
453.845150317852/8.267	4.10555e+06	5.92743e+06	5.38594e+06	5.82031e+06	5.54707e+06	3.86103e+06	4.98499e+06	5.79483e+06	3.98051e+06	5.95978e+06	6.05882e+06	5.54462e+06	4.19995e+06	5.47397e+06	6.02134e+06	5.3793e+06	3.90404e+06	5.22397e+06	4.80578e+06	9.41103e+06	6.49162e+06	5.3197e+06	5.38633e+06	7.71706e+06	4.63686e+06	9.43038e+06	6.14306e+06	7.6959e+06	6.17899e+06	5.02217e+06
782.569122201241/21.3564166666667	0	0	262994	480551	32425927	2.53921e+07	2.90928e+07	3.60437e+07	3.6296e+07	2.99917e+07	2.51432e+06	1.36152e+07	1.28069e+07	9.2287e+06	4.5363e+06	5.88919e+06	1.09874e+07	0	28236.1	4.17471e+07	0	0	314199	244591	2.90465e+07	2.25064e+07	2.70461e+07	3.50487e+07	3.05993e+07	2.94524e+07
182.080923796202/1.56966666666667	2.64733e+07	2.55718e+07	2.94897e+07	2.39519e+07	2.51044e+07	2.25461e+07	2.21514e+07	2.78208e+07	2.06558e+07	2.75781e+07	1.17941e+07	3.02615e+07	2.35514e+07	3.22255e+07	2.46957e+07	2.84672e+07	2.46296e+07	1.90403e+07	1.95536e+07	2.63032e+07	2.02913e+07	1.99624e+07	2.33466e+07	1.82676e+07	1.62095e+07	1.57949e+07	1.71955e+07	2.0239e+07	1.81591e+07	1.42917e+07
318.301189815807/11.6241666666667	4.74458e+06	4.99051e+06	5.13565e+06	5.21993e+06	4.74355e+06	5.21243e+06	4.92561e+06	4.93641e+06	5.04839e+06	5.05291e+06	6.33165e+06	7.05118e+06	6.92799e+06	6.93927e+06	7.00932e+06	6.84147e+06	7.03673e+06	6.07702e+06	7.12933e+06	6.63679e+06	4.93615e+06	4.11582e+06	4.73464e+06	4.4271e+06	5.42007e+06	4.22926e+06	4.79452e+06	4.24366e+06	4.6247e+06	4.9076e+06
571.360786674871/16.4395	1.38645e+07	1.17537e+07	8.11653e+06	9.45868e+06	1.0281e+07	9.3987e+06	9.4271e+06	1.06604e+07	6.52031e+06	1.51986e+07	2.33409e+06	2.01489e+06	3.46421e+06	2.68772e+06	2.61138e+06	3.76231e+06	3.83632e+06	4.20674e+06	2.78894e+06	3.68728e+06	7.80618e+06	1.01846e+07	7.84767e+06	6.9051e+06	6.96256e+06	1.06603e+07	5.74339e+06	9.85903e+06	8.37872e+06	5.07846e+06
466.317755829156/10.8471666666667	8.67876e+06	4.34185e+06	3.60043e+06	7.31164e+06	1.36149e+07	6.57932e+06	5.00125e+06	8.2982e+06	5.3577e+06	1.21998e+07	5.67232e+06	8.65238e+06	7.43539e+06	5.30818e+06	9.24245e+06	7.25477e+06	6.1111e+06	6.2714e+06	9.10762e+06	5.213e+06	4.29829e+06	6.17423e+06	4.50095e+06	4.34722e+06	6.19508e+06	1.49664e+07	6.89824e+06	1.14043e+07	3.3311e+06	2.92646e+06
182.080961613973/2.3545	1.55586e+07	1.40295e+07	1.6307e+07	1.39834e+07	1.44675e+07	1.58581e+07	1.36741e+07	5.21319e+06	1.35392e+07	1.55507e+07	3.88727e+06	1.11419e+07	1.1504e+07	1.23007e+07	1.2037e+07	1.20373e+07	1.17044e+07	1.69727e+07	1.13785e+07	1.10274e+07	1.25178e+07	1.18556e+07	1.22465e+07	1.6297e+07	8.61679e+06	9.82587e+06	1.79102e+07	1.1346e+07	2.04352e+06	1.9411e+07
758.570947119246/21.65	0	0	0	176040	2.0753e+07	1.60382e+07	2.2501e+07	2.60473e+07	1.79655e+07	3.24295e+07	3.57483e+07	1.35642e+07	2.75537e+07	1.59871e+07	1.85411e+06	3.06268e+07	2.87911e+07	0	0	1.04513e+07	0	0	0	122247	2.2767e+07	3.39717e+07	2.53678e+07	1.78268e+07	2.26328e+07	2.03651e+07
782.570787003713/21.8556666666667	0	0	251016	7.19732e+06	1.63135e+07	1.83784e+07	2.67289e+07	3.21729e+07	4.59582e+07	2.95776e+07	1.61517e+07	1.81166e+07	2.62633e+07	1.89867e+07	3.72316e+06	2.47685e+07	3.40893e+07	0	97999.3	8.5877e+06	0	0	153159	6.0602e+06	1.73211e+07	3.31693e+07	3.66741e+07	3.57887e+07	3.4425e+07	4.09561e+07
526.294483775302/15.0086666666667	4.7914e+06	6.11486e+06	5.24618e+06	7.37181e+06	6.30562e+06	6.06745e+06	5.82491e+06	3.85372e+06	4.96539e+06	3.65797e+06	7.97197e+06	7.03504e+06	7.7654e+06	6.25074e+06	7.21702e+06	5.80747e+06	4.02583e+06	5.3351e+06	5.46905e+06	7.59193e+06	5.55371e+06	5.42335e+06	6.39727e+06	4.71393e+06	7.52177e+06	5.89836e+06	5.13482e+06	6.88293e+06	7.4616e+06	7.48106e+06
907.580549406223/16.0051666666667	5.69119e+06	3.67143e+06	1.83546e+07	7.16949e+06	4.91877e+06	2.42506e+06	2.71488e+06	1.71366e+07	2.80264e+06	6.8585e+06	6.53549e+06	3.66984e+06	1.25353e+07	9.35475e+06	3.43166e+06	3.41759e+06	3.68206e+06	5.85842e+06	3.10021e+06	4.44849e+06	7.51876e+06	4.73189e+06	3.87164e+06	3.23535e+06	3.61759e+06	3.61791e+06	2.84903e+06	2.80482e+06	2.72932e+06	3.02851e+06
758.570686725632/20.6295	0	0	0	78099.4	2.46006e+06	1.65788e+07	1.49176e+07	1.96656e+07	1.20353e+07	3.24938e+07	3.74132e+07	1.33834e+07	4.24944e+07	3.23529e+07	526039	1.49123e+07	1.3257e+07	0	0	551717	0	0	0	32667.6	2.11325e+07	1.62738e+07	1.35366e+07	1.40614e+07	1.58774e+07	1.70404e+07
450.322963423653/12.9023333333333	5.72027e+06	3.31197e+06	1.67943e+06	3.97363e+06	5.66294e+06	1.72958e+06	2.90634e+06	1.16417e+07	3.75236e+06	6.36921e+06	9.00576e+06	6.07951e+06	3.43764e+06	1.4959e+07	5.14875e+06	4.71792e+06	7.02958e+06	1.25094e+07	8.59759e+06	1.21487e+07	3.05275e+06	4.97286e+06	2.96115e+06	2.7892e+06	4.06537e+06	9.96835e+06	5.25994e+06	9.24908e+06	2.23683e+06	2.1632e+06
688.347159737044/14.7976666666667	7.42608e+06	1.46228e+07	2.7356e+06	8.9913e+06	1.08248e+07	8.10145e+06	1.01314e+07	5.61067e+06	6.9295e+06	6.17478e+06	1.12141e+07	1.09362e+07	1.33151e+07	5.94673e+06	9.37214e+06	2.23546e+07	1.43567e+07	9.12541e+06	6.34195e+06	1.20488e+07	1.0181e+07	1.30724e+07	5.90126e+06	6.90975e+06	1.23494e+07	7.4995e+06	5.81377e+06	4.59033e+06	1.55255e+07	3.23667e+06
269.226539980724/21.389	2.77718e+07	2.43042e+07	1.83943e+07	36923.9	0	349087	4.59417e+06	6.0384e+06	5.63945e+06	4.57475e+06	8749.49	1.27913e+06	1.78146e+07	13408.5	2.06512e+07	2.41576e+07	2.7381e+07	1.19656e+07	1.93676e+07	0	2.57471e+07	1.80448e+07	1.61644e+07	3636.36	688099	7.01069e+06	4.38915e+06	1.87089e+06	2.79306e+06	1.49708e+06
932.630072668866/10.8398333333333	6.40742e+06	1.49381e+06	1.27446e+06	3.90657e+06	1.484e+07	3.42054e+06	1.99289e+06	5.85588e+06	2.51086e+06	1.17117e+07	3.13364e+06	7.16916e+06	5.06651e+06	2.85527e+06	7.80477e+06	4.9034e+06	3.8509e+06	3.82151e+06	7.96726e+06	2.72388e+06	1.58807e+06	245246	1.92465e+06	1.52965e+06	3.51422e+06	1.27523e+07	4.15297e+06	8.25352e+06	988716	845548
521.344914219129/15.02475	6.50857e+06	8.33903e+06	6.31127e+06	7.5248e+06	4.55103e+06	7.14538e+06	5.56084e+06	3.33349e+06	6.93212e+06	2.02176e+06	3.21629e+06	4.30864e+06	8.98481e+06	2.50838e+06	4.50411e+06	7.36841e+06	1.33317e+07	3.17793e+06	3.62163e+06	4.18388e+06	1.18913e+07	8.86626e+06	6.21655e+06	9.77919e+06	9.41986e+06	7.51164e+06	6.10998e+06	6.04022e+06	6.57378e+06	5.49298e+06
993.681028409233/16.104	6.63835e+06	6.85717e+06	1.12709e+07	8.9681e+06	7.02994e+06	5.57172e+06	5.68176e+06	8.20614e+06	5.69893e+06	5.65755e+06	5.12959e+06	2.92854e+06	1.28376e+07	5.03926e+06	4.11654e+06	4.05102e+06	6.66324e+06	5.55435e+06	4.88659e+06	4.06878e+06	7.52965e+06	6.16613e+06	6.62498e+06	6.88566e+06	7.82e+06	6.84849e+06	5.71497e+06	6.1544e+06	6.48412e+06	6.90082e+06
167.089375516182/4.74916666666667	1.427e+07	1.30519e+07	1.51745e+07	1.2442e+07	1.32572e+07	1.33622e+07	1.16923e+07	1.40268e+07	1.15568e+07	1.48761e+07	1.4142e+07	1.69407e+07	1.25046e+07	1.76749e+07	1.36093e+07	1.63226e+07	1.50449e+07	1.51055e+07	1.09839e+07	1.31361e+07	1.20241e+07	11515835	1.29168e+07	1.06437e+07	9.17112e+06	9480133	1.04734e+07	1.062e+07	1.03355e+07	9.0693e+06
275.278051890722/11.485	5.34368e+06	5.89574e+06	6.08019e+06	6.39348e+06	5.64276e+06	6.17233e+06	5.70786e+06	5.20922e+06	5.89764e+06	5.79555e+06	7.44285e+06	8.52976e+06	8.18274e+06	7.97296e+06	8.79197e+06	8.04125e+06	8.29383e+06	7.10829e+06	9.00626e+06	8.43331e+06	6.42713e+06	4.84829e+06	5.75045e+06	5.45643e+06	6.79745e+06	4.90794e+06	5.90958e+06	4.98314e+06	5.51428e+06	5.97537e+06
294.155122394609/3.01591666666667	1.62147e+07	1.54978e+07	4.60538e+06	8.49768e+06	1.58204e+07	2.07836e+07	1.19739e+07	1.06614e+07	2.17307e+07	1.77524e+07	1.17702e+07	1.08211e+07	1.13488e+07	9.11222e+06	9.24654e+06	1.98142e+07	2.76238e+07	1.07844e+07	1.06952e+07	1.15388e+07	1.80447e+07	2.77031e+07	1.84818e+07	2.3057e+07	2.9612e+07	2.82549e+07	1.73081e+07	1.57101e+07	2.54873e+07	1.59834e+07
317.233172018492/21.772	1.10416e+07	1.3306e+07	8.82709e+06	9003.87	0	0	6.86591e+06	4.76214e+06	3.98483e+06	5.09258e+06	0	0	3.89299e+06	0	5.73924e+06	6.55483e+06	2.9121e+06	9.96133e+06	6.61065e+06	0	1.59689e+07	1.14254e+07	9.82424e+06	0	0	6.66774e+06	6.39318e+06	7.33691e+06	4.27618e+06	3.16072e+06
523.360555205946/16.3526666666667	8.51563e+06	9.9022e+06	8.01941e+06	8.76528e+06	5.0022e+06	8.5987e+06	6.97759e+06	5.2207e+06	9.79376e+06	5.15295e+06	1.24795e+06	1.38008e+06	4.5858e+06	976436	1.70142e+06	3.70004e+06	6.38842e+06	1.60239e+06	1.51889e+06	1.8892e+06	1.37797e+07	1.09354e+07	7.6074e+06	1.04828e+07	1.09561e+07	9.38261e+06	7.00129e+06	7.45041e+06	7.72284e+06	7.26999e+06
209.092107883843/4.6995	4.0691e+06	4.56748e+06	6.13843e+06	6.18393e+06	5.92082e+06	4.66888e+06	5.15264e+06	3.37713e+06	4.73098e+06	4.00236e+06	5.15776e+06	5.2174e+06	9.05282e+06	4.81478e+06	4.75601e+06	2.74038e+06	3.77209e+06	3.30235e+06	5.34084e+06	5.24871e+06	3.09619e+06	3.39921e+06	2.5632e+06	4.77154e+06	4.35194e+06	4.55144e+06	4.80768e+06	3.3314e+06	3.54338e+06	3.16567e+06
793.601151927097/8.10166666666667	3.41946e+06	4.62173e+06	4.23123e+06	4.6121e+06	4.97876e+06	3.69184e+06	3.97101e+06	4.63867e+06	3.41002e+06	5.12005e+06	5.36562e+06	4.83415e+06	4.16675e+06	5.19473e+06	5.29133e+06	5.03943e+06	4.10341e+06	4.64872e+06	4.32889e+06	7.97775e+06	4.60523e+06	4.15576e+06	4.14092e+06	5.81777e+06	3.74113e+06	7.34045e+06	4.65822e+06	6.0782e+06	4.72751e+06	3.77993e+06
782.570531793248/22.1685	0	0	166388	7.08737e+06	3.60657e+07	8.48947e+06	1.58794e+07	1.47693e+07	1.39785e+07	1.36901e+07	7.42096e+06	9.86563e+06	2.22445e+07	1.73299e+07	5.27361e+07	1.95211e+07	1.67032e+07	0	61822.2	5.0991e+06	0	0	99878.6	5.33452e+06	1.18299e+07	1.64452e+07	1.56085e+07	1.50203e+07	1.26766e+07	1.32509e+07
680.517101092886/7.90933333333333	3.47362e+06	4.72553e+06	4.19479e+06	4.34015e+06	5.02691e+06	3.69961e+06	3.79791e+06	4.72684e+06	3.32572e+06	5.20581e+06	5.27801e+06	4.58776e+06	4.1097e+06	5.10949e+06	5.32428e+06	4.80119e+06	3.90697e+06	4460210	4.27782e+06	7.26314e+06	4.5042e+06	4.21288e+06	4.00009e+06	5.91371e+06	3.78094e+06	7.38996e+06	4.55841e+06	6.22363e+06	4.90807e+06	3.91908e+06
340.762033138756/7.91816666666667	3.37397e+06	4.39859e+06	3.85715e+06	3.88297e+06	4.48775e+06	3.12841e+06	3.4837e+06	4.25139e+06	2.92572e+06	4.55417e+06	4.39946e+06	3.64674e+06	3.30979e+06	4.02344e+06	4.41637e+06	3.79487e+06	2.91413e+06	3.66384e+06	3.82437e+06	6.37157e+06	4.63557e+06	4.23109e+06	3.86476e+06	6.01427e+06	3.68903e+06	7.61324e+06	4.75108e+06	6.05153e+06	4.94542e+06	4.02272e+06
455.297637920057/16.0238333333333	6.16073e+06	4.89751e+06	1.22483e+07	6.95367e+06	5.48235e+06	3.62384e+06	3.76815e+06	1.18383e+07	3.90885e+06	6.68706e+06	6.25789e+06	4.40624e+06	9.60007e+06	7.63262e+06	4.20387e+06	4.28881e+06	4.58429e+06	5.83444e+06	4.03773e+06	5.01328e+06	7.02267e+06	5.22421e+06	4.64569e+06	4.71887e+06	5.00376e+06	4.83613e+06	4.1499e+06	3.98212e+06	4.04195e+06	4.25368e+06
644.379207540854/17.73725	1.19325e+07	1.08415e+07	8.39463e+06	9.87806e+06	1.11695e+07	2.58405e+06	7.89153e+06	1.99062e+07	7.92298e+06	5.42724e+06	9.00111e+06	9.28418e+06	1.83302e+07	4.16428e+06	9.40432e+06	1.32959e+07	13889217	1.32305e+07	7.13657e+06	9.28025e+06	9.53897e+06	9.65627e+06	9.65356e+06	1.20587e+07	1.27836e+07	1.30272e+07	8.35394e+06	7.95629e+06	9.25868e+06	6.55807e+06
432.312478898336/12.5328333333333	5.55724e+06	3.2419e+06	2.96203e+06	7.05999e+06	1.09242e+07	5.69187e+06	3.87515e+06	3.6344e+06	4.60322e+06	6.61036e+06	1.8119e+06	4.70364e+06	2.47162e+06	1.43654e+06	4.04787e+06	3.90906e+06	3.99659e+06	1.90695e+06	1.93972e+06	1.22036e+06	2.11654e+06	5.36118e+06	4.02307e+06	4.14899e+06	5.93125e+06	1.69942e+07	6.84958e+06	1.49143e+07	3.91577e+06	4.07382e+06
502.29488066416/15.0429166666667	4.45248e+06	5.64388e+06	7.11127e+06	7.63595e+06	3.98492e+06	5.28216e+06	5.46461e+06	3.76934e+06	5.81897e+06	4.38753e+06	1.97155e+06	2.90859e+06	4.18611e+06	2.08069e+06	2.92994e+06	2.76119e+06	2.48991e+06	1.61998e+06	2.57589e+06	2.66554e+06	6.35872e+06	4.5904e+06	6.30742e+06	6.38035e+06	7.69479e+06	5.58214e+06	4.98036e+06	5.29177e+06	5.9697e+06	7.03628e+06
497.344881889184/15.7268333333333	5.6063e+06	5.53197e+06	9.56328e+06	7.43849e+06	5.5791e+06	4.39294e+06	4.74717e+06	6.90747e+06	5.00013e+06	4.97601e+06	3.89764e+06	2.50765e+06	1.07526e+07	3.995e+06	3.34895e+06	3.36525e+06	5.65907e+06	4.38994e+06	3.99984e+06	3.26481e+06	6.05861e+06	5.08962e+06	5.71646e+06	5.94168e+06	6.49996e+06	5.81409e+06	4.70274e+06	5.07994e+06	5.31463e+06	5.57082e+06
613.160564241573/2.13925	1.88815e+06	9.5105e+06	4.18672e+06	9.17259e+06	1.20575e+07	5.20362e+06	8.49726e+06	3.51649e+06	7.32637e+06	1.34462e+07	4.08965e+06	7.80389e+06	1.20257e+07	898464	1.38296e+07	1.04088e+07	1.07924e+07	348111	1.39867e+07	2.67842e+06	1.09993e+07	1.26932e+07	1.22131e+07	1.08468e+07	1.09828e+07	1.16666e+07	1.31172e+07	1.26407e+07	1.0857e+07	1.09785e+07
86.0970826469673/2.1925	2.2064e+07	2.02703e+07	2.30895e+07	1.7465e+07	3.48904e+06	2.77567e+06	1.77386e+07	2.24135e+07	1.27477e+07	2.78598e+06	2.21535e+07	2.378e+07	3.51838e+06	3.2276e+07	2.26862e+07	2.58009e+07	2.29561e+07	2.13943e+07	1.17209e+07	2.19044e+07	1.8471e+07	1.3416e+07	2.6171e+06	2.78533e+06	1.38488e+07	2.51846e+06	1.65275e+07	1.38794e+07	1.89124e+07	1.44149e+07
664.347534615002/14.7788333333333	1.31823e+07	1.35386e+07	2.97625e+06	4.89496e+06	4.48068e+06	3.51065e+06	5.10935e+06	9.04863e+06	4.89614e+06	4.8712e+06	5.56465e+06	8.51479e+06	4.4735e+06	1.06463e+06	9.49265e+06	1.28861e+07	1.47736e+07	5.24291e+06	6.08829e+06	3.0208e+06	1.24672e+07	1.07928e+07	1.07044e+07	5.71192e+06	1.82745e+07	1.66829e+07	9.91831e+06	1.07477e+07	1.26711e+07	8.34602e+06
282.280070146063/13.73575	8.04665e+06	8.5707e+06	7.34104e+06	9.16938e+06	7.28901e+06	7.65786e+06	8.28014e+06	6.42452e+06	6.46916e+06	6.61304e+06	5.87337e+06	6.09386e+06	5.41851e+06	5.95064e+06	4.91956e+06	7.06095e+06	5.7154e+06	3.68744e+06	5.29844e+06	5.7819e+06	8.31757e+06	8.07269e+06	7.23939e+06	7.02684e+06	6.82715e+06	6.76462e+06	7.24368e+06	8.86949e+06	7.62299e+06	6.613e+06
478.294367717767/14.9410833333333	3.31274e+06	4.81173e+06	5.57848e+06	7.22079e+06	2.47629e+06	3.78643e+06	3.07096e+06	1.83901e+06	4.6146e+06	832554	1.8776e+06	3.83293e+06	8.69754e+06	1.37587e+06	3.65512e+06	4.4559e+06	8.01367e+06	1.51523e+06	2.81391e+06	2.63909e+06	9.2884e+06	4.45039e+06	4.91692e+06	7.73779e+06	6.40243e+06	3.88411e+06	3.45561e+06	3.36422e+06	3.70376e+06	4.48766e+06
353.266940584856/21.606	1.86056e+07	1.76323e+07	1.89739e+07	62629.9	0	0	2.06765e+06	2.28342e+06	1.54558e+06	2.00978e+06	59172.5	0	2.8234e+06	49233.6	7.34396e+06	3.92226e+06	2.01409e+06	1.83024e+07	1.83538e+07	0	1.90812e+07	1.80581e+07	1.63135e+07	27445.3	0	1.82126e+06	1.6023e+06	1.68064e+06	1.59371e+06	1.73491e+06
545.345007591467/15.1201666666667	5.27724e+06	7.66313e+06	4.99808e+06	6.04268e+06	3.71256e+06	6.78645e+06	5.27174e+06	2.71086e+06	5.75919e+06	3.56917e+06	1.59829e+06	1.89096e+06	4.11339e+06	1.21612e+06	2.14623e+06	3.05269e+06	6.04196e+06	1.36142e+06	1.93899e+06	1.85608e+06	8.38187e+06	6.84305e+06	5.74188e+06	7.10783e+06	9.655e+06	7.32404e+06	5.25161e+06	5.94312e+06	6.39864e+06	5.49638e+06
964.646678152686/18.3843333333333	5.02922e+06	5.20113e+06	1.11182e+07	7.247e+06	4.68003e+06	3.36642e+06	3.23459e+06	8.94252e+06	2.99738e+06	4.37285e+06	4.44446e+06	3.8888e+06	9.32397e+06	5.60118e+06	3.91878e+06	3.67763e+06	3.96099e+06	4.67851e+06	3.72691e+06	3.66602e+06	6.68218e+06	5.67446e+06	5.21805e+06	5.47176e+06	5.77043e+06	5.11343e+06	4.20535e+06	4.01208e+06	4.23437e+06	4.41316e+06
570.357274648599/15.8620833333333	6.06647e+06	4792397	6.39469e+06	6.09243e+06	4.60679e+06	3.39021e+06	3.95335e+06	5.01229e+06	3.79774e+06	2.90689e+06	3.60563e+06	3.46312e+06	9.6744e+06	3.51045e+06	4.80545e+06	5.41645e+06	9.20114e+06	4.90336e+06	4.54412e+06	6.31996e+06	5.55414e+06	4.23374e+06	3.01027e+06	3.70357e+06	6.61136e+06	4.63428e+06	2.6708e+06	2.45625e+06	4.51907e+06	2.22696e+06
367.150936130295/5.633	7.96412e+06	6.74184e+06	3.97562e+06	5.11417e+06	8.59736e+06	7.51353e+06	6.6273e+06	7.86282e+06	6.54298e+06	9.78185e+06	8.26926e+06	1.11964e+07	5.66327e+06	8.90388e+06	9.64528e+06	1.74108e+07	1.3787e+07	1.29054e+07	6.86243e+06	7.93578e+06	4.24234e+06	5.40413e+06	5.99525e+06	5.44963e+06	4.85246e+06	4.58545e+06	3.94896e+06	5.54605e+06	4.82014e+06	2.79311e+06
448.307537532438/10.841	6.21888e+06	3.13963e+06	2.63759e+06	5.20486e+06	1.00756e+07	4.73745e+06	3.55472e+06	5.84977e+06	3.86763e+06	8.53867e+06	4.19611e+06	6.33617e+06	5.46685e+06	3.93123e+06	6.76829e+06	5.33125e+06	4.4936e+06	4.56838e+06	6.69742e+06	3.87031e+06	3.19268e+06	4.63925e+06	3.40886e+06	3.26156e+06	4.69184e+06	1.07926e+07	5.28162e+06	8.66168e+06	2.62102e+06	2.34278e+06
137.04627374858/1.8565	4.53523e+06	2.38997e+06	4.2313e+06	3.69123e+06	5.96026e+06	2.8501e+06	3.72104e+06	5.05852e+06	2.99362e+06	4.65007e+06	6.81506e+06	3.34059e+06	2.80075e+06	6.91596e+06	4.16442e+06	3.2235e+06	1.63403e+06	6.13379e+06	3.63452e+06	6.15106e+06	3.0226e+06	2.89901e+06	2.97085e+06	3.93661e+06	2.85213e+06	4.53259e+06	2.80716e+06	3.09981e+06	2.25454e+06	2.79899e+06
905.682047009663/8.267	3.09167e+06	4.18044e+06	3.78192e+06	4.14006e+06	4.14564e+06	3.19953e+06	3.62957e+06	4.28747e+06	3.10795e+06	4.52286e+06	4.94177e+06	4.672e+06	3.58756e+06	4.82064e+06	4.81531e+06	4.58138e+06	3.62387e+06	4.31534e+06	3.89958e+06	7.16955e+06	4.23037e+06	3.4546e+06	3.63657e+06	4.81491e+06	3.15297e+06	5.84435e+06	3.85539e+06	4.93313e+06	3.992e+06	3.26288e+06
783.574472166431/21.6403333333333	0	0	75428.7	190107	1.20979e+07	1.22477e+07	2.71776e+07	1.8879e+07	2.01179e+07	2.63201e+07	7.71712e+06	4.23639e+07	1.47335e+07	2.14023e+07	4.18017e+06	8.14068e+06	1.85543e+07	0	0	1.98635e+07	0	0	61589.4	233528	1.15859e+07	2.24141e+07	1.86148e+07	2.44965e+07	2.18151e+07	1.65276e+07
300.290458003444/19.905	4.39306e+06	5.02918e+06	8.54398e+06	8.47489e+06	5.39521e+06	3.74779e+06	4.59764e+06	3.36235e+06	3.74433e+06	3.70242e+06	4.49956e+06	5.26654e+06	5.89754e+06	5.0583e+06	5.86951e+06	3.61734e+06	3.32841e+06	3.9663e+06	4.80661e+06	4.20098e+06	4.27975e+06	2.97481e+06	3.84714e+06	4.32147e+06	3.73684e+06	3.05134e+06	2.7162e+06	2.49571e+06	3.1358e+06	2.54324e+06
509.885205849588/8.40025	2.51418e+06	3.86049e+06	3.51505e+06	3.75676e+06	3.29998e+06	2.29377e+06	3.14853e+06	3.83375e+06	2.42476e+06	3.87978e+06	4.03882e+06	3.94361e+06	2.59787e+06	3.69915e+06	4.11788e+06	3.37673e+06	2.3485e+06	3.55756e+06	2.89523e+06	6.33225e+06	4.40974e+06	3.19597e+06	3.36273e+06	5.01928e+06	2.82918e+06	6.01823e+06	3.66032e+06	4.94287e+06	3.90819e+06	3.15847e+06
703.576709969146/24.57425	0	20986.5	1.16239e+07	1.40867e+06	1.33614e+07	1.39957e+07	1.09047e+07	1.53667e+07	1.1026e+07	1.19449e+07	19188.3	3.1674e+06	8.75809e+06	1.93849e+07	1.25875e+07	9.61479e+06	8.63189e+06	5422.35	1.29601e+06	2.01597e+06	0	0	8.93195e+06	1.28307e+06	1.16059e+07	1.24367e+07	1.10235e+07	1.14851e+07	1.12088e+07	1.28563e+07
432.281590141606/6.817	414952	6.71866e+06	5.40742e+06	398267	4.82887e+06	466975	552551	7.39281e+06	417116	7.49476e+06	7.11895e+06	762870	550291	7.80843e+06	9.50005e+06	455240	355715	705077	6.55744e+06	1.04949e+06	406637	5.2175e+06	359784	7.23347e+06	456793	1.1761e+07	539825	1.13814e+07	5.65892e+06	1.07556e+06
476.308038386993/7.017	380756	6.51784e+06	5.16468e+06	340894	4.72451e+06	433721	494085	7.18692e+06	365011	7.25459e+06	6.93101e+06	711474	498650	7.67804e+06	9.18544e+06	390203	315199	647411	6.27403e+06	969224	364304	4.94225e+06	322188	6.93661e+06	412071	1.16528e+07	483260	1.10899e+07	5.43177e+06	1.01123e+06
133.032106235955/1.84891666666667	4.11989e+06	3.75579e+06	5.03416e+06	3.96106e+06	4.24831e+06	3.9279e+06	3.75015e+06	4.44418e+06	3.47038e+06	4.50853e+06	4.74173e+06	5.19176e+06	4.19346e+06	5.52113e+06	4.55098e+06	4.53674e+06	4.15834e+06	5.60783e+06	4.07206e+06	4.42608e+06	2.94595e+06	3.13086e+06	3.2597e+06	2.59464e+06	2.36573e+06	2.60557e+06	2.65138e+06	3.006e+06	2.69802e+06	2.31681e+06
307.084028193478/2.11241666666667	471201	4.8974e+06	983773	1.31521e+06	944159	1.65466e+06	5.53948e+06	2.45936e+06	3.45484e+06	498866	2.38446e+06	2.3757e+06	8.70393e+06	86914.3	3.62984e+06	1.09304e+06	3.71335e+06	37223.3	1.15698e+07	2.53548e+06	7.36661e+06	1.13293e+07	8.54949e+06	1.1749e+07	1.62244e+07	1.41059e+07	1.40639e+07	1.18006e+07	1.07419e+07	1.24754e+07
310.129371106773/4.91566666666667	1.1304e+07	9.79966e+06	4.64671e+06	6.18109e+06	1.11648e+07	1.0314e+07	8.97178e+06	9.7184e+06	1.11136e+07	1.30919e+07	9.85888e+06	1.07617e+07	9.39789e+06	8.80651e+06	9.68317e+06	1.78375e+07	1.63385e+07	1.22968e+07	8.48777e+06	9.0832e+06	8.00613e+06	9.78717e+06	9.09724e+06	1.03226e+07	1.01884e+07	9.64727e+06	8.06506e+06	1.02229e+07	9.28453e+06	5.54917e+06
454.294318144605/15.6151666666667	3.76456e+06	2.58714e+06	1.18592e+07	4.54622e+06	3.45519e+06	1.85169e+06	2.08897e+06	1.26994e+07	2.16214e+06	5.03519e+06	4.47398e+06	2.90986e+06	8.91596e+06	6.51507e+06	2.71049e+06	2.68101e+06	2.7365e+06	3.81163e+06	2.56397e+06	3.32627e+06	4.10254e+06	2.59671e+06	2.54465e+06	2.81745e+06	2.70577e+06	2.81312e+06	2.44869e+06	2.03706e+06	1.96513e+06	2.54997e+06
153.040659071605/2.06733333333333	6.35547e+06	7.992e+06	6.63238e+06	9.74564e+06	9.31617e+06	6.63389e+06	1.20271e+07	6.32397e+06	1.31607e+07	5.06778e+06	5.76082e+06	2.06399e+06	7.79652e+06	1.88623e+06	6.77475e+06	2.3057e+06	3.30754e+06	3.17165e+06	9.88047e+06	7.81245e+06	8.99988e+06	7.74114e+06	6.64721e+06	9.10364e+06	1.00442e+07	1.01185e+07	7.89911e+06	6.7895e+06	6.29829e+06	7.53036e+06
301.294061425915/13.73575	6.72494e+06	7.36959e+06	6.30439e+06	7.77031e+06	6.17883e+06	6.57741e+06	7.0324e+06	5.41156e+06	5.41278e+06	5.50923e+06	4.86854e+06	5.01535e+06	4.46813e+06	4.90761e+06	4.06814e+06	5.8164e+06	4.69054e+06	3.20455e+06	4.48981e+06	4.72052e+06	7.41771e+06	7.07675e+06	6.27504e+06	6.08577e+06	5.76049e+06	5.63156e+06	6.10177e+06	7.33403e+06	6.32434e+06	5.46583e+06
758.570858648492/20.3446666666667	0	0	0	76571.7	874011	1.28937e+07	1.20372e+07	1.26524e+07	7.81975e+06	9.85191e+06	29919673	1.47786e+07	2.07686e+07	2.22443e+07	708521	1.80234e+07	14378079	0	0	14872.8	0	0	0	66207.3	1.09703e+07	1.03367e+07	9.22773e+06	8.55474e+06	8.632e+06	1.04113e+07
133.097467284207/1.065	3.83212e+06	3.72607e+06	4.66289e+06	3.88698e+06	3.72957e+06	3.79304e+06	3.51002e+06	3.76427e+06	3.29216e+06	4.00481e+06	3.81449e+06	3.68284e+06	3.45217e+06	4.45285e+06	3.49978e+06	3.53556e+06	3.63459e+06	3.89678e+06	2.99672e+06	3.3925e+06	3.58778e+06	3.36267e+06	4.05979e+06	3.14702e+06	2.87728e+06	2.8543e+06	3.05979e+06	3.03362e+06	3.11865e+06	2.62461e+06
569.345259212967/15.0895833333333	3.65772e+06	4.70665e+06	2.40563e+06	2.99919e+06	3.98434e+06	4.42066e+06	3.3985e+06	2.44566e+06	2.87007e+06	2.34276e+06	3.7219e+06	2.8181e+06	3.90082e+06	2.82742e+06	3.46051e+06	4.75436e+06	5.05786e+06	3.10622e+06	2.57156e+06	3.77186e+06	3.77804e+06	4.57694e+06	3.89473e+06	3.23556e+06	4.51977e+06	4.68597e+06	2.991e+06	4.94984e+06	4.5186e+06	3.12972e+06
546.357097505645/16.1745833333333	6.1124e+06	5.21837e+06	4.41544e+06	4.98466e+06	1.83747e+06	4.51738e+06	3.9561e+06	2.06464e+06	5.5263e+06	3.2744e+06	1.02434e+06	2.3684e+06	1.2865e+06	640439	1.83426e+06	5.12504e+06	6.21201e+06	1.31231e+06	1.65213e+06	1.89798e+06	7.31592e+06	5.92572e+06	3.81901e+06	7.87169e+06	6.87927e+06	4.43713e+06	3.20641e+06	3.51277e+06	4.53294e+06	2.8391e+06
72.0816536736415/1.83133333333333	3.60015e+06	3.52466e+06	4.07459e+06	3.63863e+06	3.78989e+06	3.66888e+06	3.43562e+06	3.99866e+06	3.20171e+06	3.78444e+06	3.85679e+06	4.50923e+06	3.65764e+06	4.48181e+06	3.94118e+06	3.99966e+06	3.7232e+06	4.65623e+06	3.77271e+06	3.79678e+06	2.5926e+06	2.65703e+06	2.9927e+06	2.40685e+06	2.19158e+06	2.06781e+06	2.28946e+06	2.5403e+06	2.36353e+06	2.06831e+06
388.255302071373/6.59833333333333	368216	5.79626e+06	4.69366e+06	361854	4.15633e+06	420883	508454	6.43054e+06	372247	6.44485e+06	5.85997e+06	653952	476717	6.60464e+06	8.01693e+06	412535	309382	600551	5.63833e+06	961643	393096	4.42042e+06	340144	6.23596e+06	406475	1.00743e+07	495853	9.73666e+06	4.80885e+06	937355
414.301846779379/12.5378333333333	4.18012e+06	2.38058e+06	2.18901e+06	5.25941e+06	8.15391e+06	4.28243e+06	2.7961e+06	2.71788e+06	3.43713e+06	4.99377e+06	1.40842e+06	3.68764e+06	1.89802e+06	1.13979e+06	3.17337e+06	3.04643e+06	3.14401e+06	1.46552e+06	1.53632e+06	972900	1.58874e+06	3.99836e+06	3.0379e+06	3.11217e+06	4.53737e+06	1.28764e+07	5.29889e+06	1.10326e+07	3.04023e+06	3.13138e+06
206.100496434791/5.766	5.66385e+06	4.82143e+06	5.6195e+06	4.19602e+06	4.58134e+06	4.9219e+06	4.04945e+06	5.34444e+06	4.22462e+06	5.95538e+06	5.04788e+06	6.49428e+06	3.64278e+06	6.68258e+06	4.9993e+06	6.54159e+06	5.81634e+06	5.95498e+06	3.56321e+06	4.57526e+06	4.77974e+06	4.61018e+06	5.36966e+06	4.02687e+06	3.24791e+06	3.42636e+06	3.78083e+06	4.1495e+06	3.83637e+06	3.16314e+06
570.357259698259/16.1705	7.16874e+06	8.04358e+06	1.14367e+06	3.45871e+06	4.19006e+06	7.02857e+06	5.05882e+06	2.80268e+06	4.04239e+06	7.60975e+06	566241	634458	312975	804510	773993	1.21683e+06	1.22368e+06	1.0907e+06	838934	1.11615e+06	5.02391e+06	6.24116e+06	5.47913e+06	3.72677e+06	3.78182e+06	6.40201e+06	3.65654e+06	7.00499e+06	4.79005e+06	3.27304e+06
759.574492865305/21.04975	0	0	0	39998.7	9.2289e+06	1.29891e+07	1.00406e+07	8.80659e+06	1.76509e+07	2.29325e+07	3.49439e+07	1.94654e+07	1.08705e+07	1.09676e+07	506004	1.14274e+07	8.93839e+06	0	0	251371	0	0	0	12374.5	1.40849e+07	7.02439e+06	7.94438e+06	9.01174e+06	6.82135e+06	6.98948e+06
759.574914573584/21.339	0	0	0	62303.3	1.6116e+07	1.35519e+07	1.27266e+07	1.88501e+07	1.30196e+07	1.28255e+07	8.76547e+06	1.13565e+07	1.24288e+07	1.04115e+07	569562	1.79862e+07	1.19144e+07	0	0	2.90067e+06	0	0	0	7150.4	1.50864e+07	1.26284e+07	1.08485e+07	1.80952e+07	1.19135e+07	1.02085e+07
480.310538032636/16.8615833333333	3.94286e+06	5.02012e+06	2.09029e+07	9.75284e+06	4.31242e+06	3.10599e+06	3.44967e+06	1.00219e+07	4.63262e+06	3.53423e+06	35517.6	1.52987e+06	6.04333e+06	1.69547e+06	1.15102e+06	1.06148e+06	1.7444e+06	2.22497e+06	770884	1.21956e+06	5.90448e+06	3.93779e+06	4.17952e+06	6.07944e+06	6.17993e+06	4.79154e+06	3.77983e+06	2.77546e+06	3.3791e+06	3.98301e+06
525.37630424579/18.0383333333333	4.77668e+06	5.31261e+06	6.20913e+06	5.65703e+06	3.92015e+06	3.51861e+06	2.93254e+06	4.03781e+06	3.14614e+06	5.03143e+06	2.72646e+06	2.58563e+06	7.77173e+06	2.62726e+06	3.62735e+06	3.51462e+06	4.56685e+06	3.13898e+06	3.92054e+06	2.71593e+06	5.09156e+06	4.67732e+06	4.31564e+06	5.02257e+06	5.61204e+06	5.63899e+06	4.35861e+06	4.11544e+06	4.05731e+06	4.52581e+06
566.429797931837/7.63283333333333	1.96453e+06	3.41567e+06	2.93796e+06	1.9673e+06	3.40744e+06	1.85887e+06	1.88058e+06	3.5568e+06	1.70655e+06	3.78839e+06	3.8231e+06	2.47052e+06	2.15421e+06	3.79524e+06	4.05519e+06	2.36062e+06	1.73112e+06	2.26906e+06	3.02309e+06	3.72241e+06	2.55525e+06	3.07059e+06	2.00247e+06	4.20625e+06	2.10375e+06	5.7934e+06	2.61312e+06	4.95978e+06	3.62195e+06	2.42667e+06
305.248035285443/21.3393333333333	7.48086e+06	5.93965e+06	8.97364e+06	95604.7	862407	468131	4.13358e+06	4.68897e+06	2.8161e+06	4.85905e+06	607455	672864	752274	5.83096e+06	3.94862e+06	3.3975e+06	2.51364e+06	7.40517e+06	3.4406e+06	623752	7.2497e+06	7.08049e+06	5.58664e+06	827663	764473	4.2489e+06	3.05374e+06	3.07598e+06	3.34017e+06	2.51921e+06
520.341533250599/15.6631666666667	5.00091e+06	4.98467e+06	6.9366e+06	5.9635e+06	2.59046e+06	3.38957e+06	3.29511e+06	3.24971e+06	4.71636e+06	2.30423e+06	1.32984e+06	2.48681e+06	6.25543e+06	3.91591e+06	2.77085e+06	4.59367e+06	8.28441e+06	5.85954e+06	2.32804e+06	1.76727e+06	7.18258e+06	4.4193e+06	2.96454e+06	5.40093e+06	6.28434e+06	4.35387e+06	3.07027e+06	2.72032e+06	3.70405e+06	2.36341e+06
780.553139482685/21.026	0	0	558971	1.92245e+06	1.34073e+07	7.63074e+06	8.26031e+06	2.61214e+07	4.72138e+06	6.41223e+06	6.98928e+06	3.74576e+06	1.13474e+07	9.91405e+06	4.23485e+06	9.83339e+06	7.57717e+06	0	77680.8	807329	0	0	122563	3.96354e+06	2.22375e+07	6.49908e+06	6.88963e+06	4.71531e+06	6.06432e+06	5.62507e+06
116.071075831268/1.06491666666667	3.25009e+06	3.1777e+06	3.96466e+06	3.34837e+06	3.19074e+06	3.25759e+06	3.00942e+06	3.19113e+06	2.88727e+06	3.46845e+06	3.41816e+06	3.32195e+06	3.13218e+06	4.01793e+06	3.21707e+06	3.2243e+06	3.28347e+06	3.35187e+06	2.59563e+06	3.02086e+06	3.02464e+06	2.85708e+06	3.51102e+06	2.70656e+06	2.43172e+06	2.48478e+06	2.71386e+06	2.64707e+06	2.72582e+06	2.28522e+06
529.313771198647/16.354	5.81119e+06	5.32161e+06	5.03322e+06	7.05748e+06	5.57108e+06	4.38936e+06	5.28838e+06	5.21595e+06	3.51593e+06	7.2658e+06	1.67112e+06	1.83284e+06	2.43265e+06	2.05673e+06	1.84377e+06	1.76039e+06	1.37411e+06	2.37746e+06	1.90575e+06	2.54764e+06	3.34313e+06	4.12884e+06	4.76269e+06	3.54423e+06	3.53976e+06	4.57538e+06	3.44233e+06	4.82314e+06	4.55445e+06	4.37033e+06
783.574854703618/22.1015	0	0	25197.9	3.22994e+06	6.85995e+06	1.87374e+07	1.0591e+07	1.93512e+07	9.11862e+06	1.62605e+07	3.47083e+06	4.73553e+06	1.09981e+07	8.21827e+06	2.65076e+07	8.20308e+06	19598457	0	0	3.10899e+06	0	0	0	3.61727e+06	8.80347e+06	1.28142e+07	1.11206e+07	1.0014e+07	1.39121e+07	9.62452e+06
312.111904312168/1.883	5.22177e+06	5.53311e+06	1.27373e+06	2.39494e+06	4.19003e+06	5.65289e+06	3.76774e+06	3.46909e+06	6.99923e+06	5.26408e+06	3.31512e+06	3.87995e+06	3.37962e+06	2.48103e+06	3.53047e+06	7.20624e+06	7.78894e+06	4.65481e+06	3.75218e+06	3.49086e+06	5.78288e+06	6.78867e+06	6.40101e+06	7.0993e+06	7.20184e+06	6.86548e+06	5.82861e+06	6.83548e+06	5.28786e+06	4.26389e+06
544.34148420277/15.6266666666667	5.40329e+06	8.38036e+06	6.84073e+06	7.58696e+06	4.64446e+06	6.03994e+06	4.9064e+06	4.11408e+06	4.5363e+06	4.2677e+06	2.03669e+06	2.35986e+06	5.83248e+06	2.04631e+06	3.17164e+06	3.73665e+06	5.12119e+06	1.93004e+06	2.24921e+06	2.26144e+06	6.73668e+06	6.17403e+06	4.35339e+06	6.26627e+06	9.01908e+06	7.30679e+06	3.81251e+06	4.6879e+06	5.72442e+06	3.85051e+06
261.144973030793/5.933	2.70605e+06	2.32866e+06	3.98071e+06	2.14215e+06	3.18075e+06	1.85852e+06	1.46072e+06	3.39056e+06	1.71848e+06	2.62719e+06	3.38618e+06	5.086e+06	2.91603e+06	5.23381e+06	3.75685e+06	3.6269e+06	2.65798e+06	4.60202e+06	3.37812e+06	4.06942e+06	1.60798e+06	1.36638e+06	2.16993e+06	1.76022e+06	1.22029e+06	1.46048e+06	1.8493e+06	1.68057e+06	1.59589e+06	1.32963e+06
432.312571220315/12.9046666666667	3.18084e+06	1.88117e+06	942124	2.26698e+06	3.28855e+06	1.01913e+06	1.66786e+06	6.3069e+06	2.12087e+06	3.58579e+06	4.94654e+06	3.38134e+06	1.91967e+06	7.95773e+06	2.84461e+06	2.59623e+06	3.86207e+06	6.65592e+06	4.7221e+06	6.5397e+06	1.68436e+06	2.77735e+06	1.66908e+06	1.55852e+06	2.31812e+06	5.75252e+06	3.01445e+06	5.28541e+06	1.29821e+06	1.27564e+06
481.313753250874/16.6238333333333	3.74562e+06	3.68524e+06	9.46845e+06	5.57408e+06	3.09375e+06	2.78972e+06	2.93104e+06	6.62383e+06	3.8987e+06	4.71117e+06	2.39149e+06	2.70673e+06	8.15435e+06	3.17893e+06	2.53464e+06	2.89632e+06	4.0491e+06	2.58344e+06	2.9934e+06	2.73476e+06	5.26903e+06	3.09498e+06	3.26571e+06	4.99695e+06	3.99274e+06	3.26754e+06	2.73242e+06	2.09594e+06	2.14134e+06	2.57791e+06
510.357178216629/16.9535	2.15085e+06	5.49942e+06	1.11931e+07	3.41277e+06	4.03364e+06	1.19637e+06	1.82702e+06	4.90749e+06	2.40965e+06	4.03954e+06	1.31347e+06	1.52706e+06	9.26853e+06	1.54562e+06	1.51754e+06	1.88623e+06	4.68546e+06	2.78883e+06	3.1837e+06	957646	2.82798e+06	4.29962e+06	6.49912e+06	7.45622e+06	3.45871e+06	5.37639e+06	4.0383e+06	3.81565e+06	5.44439e+06	2.19063e+06
331.284822014987/21.6051666666667	9.78184e+06	7.94425e+06	8.11156e+06	0	367989	9434.94	1.95227e+06	2.32135e+06	1.65469e+06	1.97463e+06	109798	101157	2.36129e+06	0	3.7131e+06	2.79021e+06	1.9858e+06	8.46098e+06	7.47777e+06	106377	9.28546e+06	8.9021e+06	7.11823e+06	0	44801.8	1.87667e+06	1.78291e+06	1.79491e+06	1.8047e+06	1.88558e+06
329.248237286444/20.989	6.26186e+06	5.06373e+06	6.91075e+06	38135.5	121863	306436	3.16145e+06	5.20985e+06	2.06266e+06	3.65784e+06	91164.9	94746.3	5.28939e+06	6.60614e+06	5.13789e+06	4.38971e+06	3.29772e+06	8.6243e+06	4.66209e+06	93013.5	5.75902e+06	5.68712e+06	4.85242e+06	81418.2	46969.5	2.95786e+06	2.5273e+06	2.273e+06	2.98236e+06	2.17898e+06
166.202336791725/4.74966666666667	8.02894e+06	7.26299e+06	8.52129e+06	7.00939e+06	7.26564e+06	7.40584e+06	6.52516e+06	7.75591e+06	6.40014e+06	8.27451e+06	7.34225e+06	8.97981e+06	6.48763e+06	9.18304e+06	7.26437e+06	8.51129e+06	7.90027e+06	7.95377e+06	5.83517e+06	6.92906e+06	6.57089e+06	6.28565e+06	6.97914e+06	5758418	5.02213e+06	4.9669e+06	5.50954e+06	5.61491e+06	5.41176e+06	4.64394e+06
780.553617579683/20.6220833333333	0	0	54595.5	710232	6.45168e+06	7.79553e+06	6.16696e+06	1.69032e+07	5.411e+06	9.04058e+06	55337492	4.72005e+06	6.11598e+06	1.20348e+07	412823	1.02796e+07	4.46417e+06	0	59964.1	2.64348e+06	0	0	11715.4	540137	1.07173e+07	7.60295e+06	6.19986e+06	6.09989e+06	9.60659e+06	6.42111e+06
276.144726464444/3.29466666666667	1.05037e+07	8.81627e+06	2.57781e+06	3.98665e+06	1.25495e+07	9.98803e+06	6.81435e+06	6.29848e+06	2.46102e+07	1.01827e+07	5.21167e+06	5.7379e+06	5.70215e+06	4.47972e+06	5.69188e+06	1.16723e+07	1.37962e+07	9.46524e+06	5.25101e+06	5.10629e+06	1.22367e+07	1.49821e+07	2.23477e+07	1.61561e+07	1.12243e+07	1.37873e+07	1.15618e+07	1.55888e+07	1.3578e+07	8.16163e+06
780.553184974767/21.339	0	0	1.16094e+06	952729	7.56537e+06	1.03583e+07	8.32118e+06	1.11438e+07	6.41353e+06	9.39651e+06	6.76484e+06	1.78322e+07	8.956e+06	7.91291e+06	1.18409e+06	1.60492e+07	1.39805e+07	0	150621	1.47856e+06	0	0	2.86463e+06	502934	1.37028e+07	1.17876e+07	7.5599e+06	6.23109e+06	7.5647e+06	5.78905e+06
136.075886595145/2.18083333333333	2.59806e+06	2.65603e+06	2.92702e+06	2.46895e+06	2.52304e+06	2.59986e+06	2.74709e+06	2.92961e+06	2.50516e+06	2.676e+06	3.32145e+06	2.87295e+06	2.94768e+06	3.00164e+06	2.61671e+06	2.59897e+06	2.85377e+06	2.51155e+06	2.5528e+06	3.13521e+06	2.75198e+06	3.0319e+06	3.06197e+06	3.10919e+06	3.11656e+06	3.43539e+06	3.56211e+06	3.63324e+06	4.25667e+06	3.85499e+06
468.31045490483/17.15125	2.687e+06	2.39367e+06	9.56476e+06	4.15701e+06	2.2024e+06	1.56662e+06	1.88785e+06	6.15227e+06	1993577	2.57565e+06	2.3649e+06	3.25281e+06	1.03943e+07	4.48848e+06	2.76905e+06	3.08416e+06	3.09933e+06	2.505e+06	2.59033e+06	2.39116e+06	3.44883e+06	2.22844e+06	2.42564e+06	2.83057e+06	3.02327e+06	2.41627e+06	1.71577e+06	1.44849e+06	1.76534e+06	1.91106e+06
538.388671899185/19.7693333333333	3.4876e+06	5.15016e+06	7.54211e+06	5.00604e+06	85885.6	2.48727e+06	2.4483e+06	1.36105e+06	2.83887e+06	1.52874e+06	1.76567e+06	4.08774e+06	1.55068e+07	1.63838e+06	4.43459e+06	4.93964e+06	6.39732e+06	1.63121e+06	5.47213e+06	0	3.82726e+06	3.0781e+06	3.6199e+06	4.81907e+06	5.08121e+06	5.30239e+06	2.66879e+06	1.97741e+06	2.39243e+06	2.48643e+06
518.326015216651/14.4825833333333	5.96897e+06	4.23427e+06	4.76135e+06	4.73014e+06	7.31756e+06	2.53435e+06	3.04585e+06	4.77406e+06	1.53076e+06	4.61452e+06	1.96318e+06	688570	2.29362e+06	1.01611e+06	1.56057e+06	1.95545e+06	1.64044e+06	1.162e+06	1.01166e+06	1.34668e+06	2.69254e+06	2.58934e+06	2.4463e+06	2.84352e+06	3.56029e+06	7.30788e+06	2.06568e+06	2.60461e+06	2.68094e+06	1.0498e+06
806.57065044185/24.535	0	99247.9	1.248e+06	1.71822e+06	1.30292e+07	1.34133e+07	1.04236e+07	3.57322e+06	7.71476e+06	2.55928e+06	3.2268e+07	1.22198e+07	5.6949e+06	7.16435e+06	1.87372e+07	1.00963e+07	8.18759e+06	34643.6	2.45349e+06	5.9625e+06	0	21664	1.5689e+06	2.64056e+06	1.34431e+07	9.62426e+06	1.1024e+07	9.43336e+06	7.4399e+06	1.07932e+07
642.363173559629/15.9091666666667	6.29074e+06	5.04826e+06	6.40911e+06	5.63801e+06	4.68927e+06	3.63312e+06	4.54541e+06	8.97561e+06	6.95587e+06	8.16516e+06	2.64122e+06	3.48024e+06	1.08158e+07	2.62134e+06	3.54142e+06	6.78181e+06	9.87928e+06	4.32998e+06	3.19317e+06	3.77223e+06	4.52368e+06	3.36778e+06	3.23013e+06	7.4388e+06	4.98302e+06	5.47066e+06	3.27136e+06	618967	2.7322e+06	2.07025e+06
332.332261505397/15.8906666666667	2.8801e+06	3.20492e+06	2.18491e+06	2.5247e+06	2.92111e+06	3.62778e+06	2.99965e+06	7.1098e+06	203481	4.373e+06	3.13745e+06	2.25788e+06	2.24914e+06	1.58958e+06	2.37127e+06	3.10608e+06	2.60984e+06	1.89202e+06	1.72555e+06	2.15199e+06	94385.3	1.61495e+06	2.23222e+06	1.98263e+06	1.79015e+06	1.98744e+06	2.78875e+06	3.43472e+06	2.07107e+06	2.70194e+06
759.574947303251/21.6403333333333	0	0	0	3581.32	9.99705e+06	7.68301e+06	1.07267e+07	1.25339e+07	9.21973e+06	1.55509e+07	1.57301e+07	6.3522e+06	1.30959e+07	8.44766e+06	590142	14403020	1.63935e+07	0	0	4.80831e+06	0	0	0	3778.56	1.09144e+07	1.62072e+07	1.20853e+07	8.35025e+06	1.07396e+07	9.65018e+06
908.584252145936/16.0046666666667	2.76132e+06	1.76081e+06	9.03614e+06	3.48944e+06	2.37416e+06	1.15803e+06	1.27734e+06	8.40776e+06	1.34405e+06	3.34335e+06	3.15056e+06	1.74766e+06	6.12651e+06	4.53667e+06	1.58585e+06	1.6075e+06	1.73303e+06	2.79942e+06	1.46333e+06	2.10495e+06	3.6617e+06	2.29081e+06	1.85973e+06	1.53744e+06	1.69529e+06	1.71918e+06	1.34759e+06	1.31505e+06	1.29651e+06	1.43385e+06
759.574473654231/20.6295	0	0	0	0	1.11503e+06	8.01776e+06	7.11923e+06	9.45043e+06	5.76373e+06	1.55117e+07	1.80046e+07	6.11378e+06	1.99532e+07	1.64838e+07	238047	7.06915e+06	6.22689e+06	0	0	66992.3	0	0	0	0	1.01897e+07	7.72149e+06	6.39456e+06	6.58047e+06	7.54154e+06	8.03776e+06
162.112344778653/1.22125	2.0541e+06	2.36304e+06	2.58864e+06	2.88926e+06	1.91358e+06	2.33399e+06	2.30639e+06	3.6867e+06	2.19871e+06	1.92953e+06	2.27071e+06	2.17493e+06	3.06515e+06	1.93231e+06	2.55409e+06	1.56432e+06	2.05107e+06	2.11063e+06	2.5846e+06	1.79862e+06	2.78295e+06	2.58414e+06	1.95155e+06	2.01098e+06	2.66757e+06	1.98316e+06	2.1723e+06	2.22057e+06	2.35408e+06	2.37608e+06
804.553610930922/21.7126666666667	0	0	3.34293e+06	9.25875e+06	3.37437e+06	4.7997e+06	1.08635e+07	2.59859e+07	1.55593e+07	2.17377e+07	2.97494e+06	3.68562e+06	5.20787e+06	2.76293e+06	1.79631e+06	7.37888e+06	1.27239e+07	0	4.42375e+06	2.29559e+06	0	0	1.20257e+06	1.29875e+06	3.83367e+06	1.98093e+07	1.00635e+07	1.57432e+07	1.05969e+07	9.09615e+06
546.357141953432/15.8289166666667	3.13123e+06	4.5943e+06	2.90904e+06	3.99488e+06	1.13589e+06	4.51467e+06	2.72504e+06	843872	4.75319e+06	1.51857e+06	230678	489496	933426	135757	499561	1.39722e+06	4.04756e+06	278288	660562	417991	7.59615e+06	4.06553e+06	3.51569e+06	6.39048e+06	8.00935e+06	3.53159e+06	2.38289e+06	2.99979e+06	3.25236e+06	2.91937e+06
165.054542356783/2.26666666666667	3.49393e+06	3.51388e+06	3.88599e+06	3.29324e+06	3.34496e+06	3.46082e+06	3.69304e+06	3.07919e+06	3.32399e+06	3.81528e+06	3.25061e+06	2.75517e+06	3.81887e+06	3.03469e+06	2.96873e+06	3.03274e+06	3.01391e+06	4.09283e+06	3.33786e+06	2.691e+06	3.64359e+06	4.05259e+06	3.00229e+06	4.13186e+06	4.17637e+06	4.50492e+06	4.68014e+06	2.84235e+06	5.55351e+06	5.10608e+06
377.147033609629/6.68783333333333	2.30507e+06	1.99845e+06	2.55148e+06	2.45964e+06	2.47576e+06	1.80116e+06	2.08455e+06	2.29659e+06	1.90118e+06	1.69189e+06	1.82376e+06	2.79468e+06	3.23465e+06	2.40484e+06	2.88064e+06	2.26248e+06	2.1663e+06	1.88521e+06	2.41308e+06	2.56733e+06	1.89857e+06	1.86067e+06	2.11359e+06	1.62725e+06	1.87742e+06	1.78703e+06	1.78007e+06	1.60243e+06	1.66748e+06	1.73744e+06
503.29811486254/15.3195833333333	2.86552e+06	2.97599e+06	3.98617e+06	3.82619e+06	2.41524e+06	2.7527e+06	3.18887e+06	2.73063e+06	3.30379e+06	3.38341e+06	1.33441e+06	1.94175e+06	1.52522e+06	1.67806e+06	1.81772e+06	1.4364e+06	1.00408e+06	1.37356e+06	2.01479e+06	1.65678e+06	3.21189e+06	2.51861e+06	3.44763e+06	3.37617e+06	3.25753e+06	2.81888e+06	2.99042e+06	2.69187e+06	2.87551e+06	3.74075e+06
118.086499219327/1.96991666666667	2.21226e+06	1.78308e+06	815071	1.72595e+06	2.05404e+06	1.79518e+06	1.8324e+06	2.1236e+06	8.18053e+06	1.85496e+06	1.52107e+06	2.06523e+06	9.15403e+06	1.12628e+07	9.91246e+06	1.94899e+06	1.62066e+06	2.98213e+06	2.07888e+06	1.68852e+06	1.39234e+06	1.21385e+06	1.42419e+06	1.19544e+06	5.75009e+06	1.29702e+06	1.1313e+06	6.72034e+06	6.28998e+06	886931
262.129161024872/1.83433333333333	2.32244e+06	2.20728e+06	1.01849e+06	1.39767e+06	2.45634e+06	2.57081e+06	2.04116e+06	1.93793e+06	2.82338e+06	2.73664e+06	2.26958e+06	2.77556e+06	1.97558e+06	2.19676e+06	2.47344e+06	4.16998e+06	3.70553e+06	3.29637e+06	2.58249e+06	2.14369e+06	1.78825e+06	2.31737e+06	2.10524e+06	2.40812e+06	2.44651e+06	2.33842e+06	2.0188e+06	2.6254e+06	2.09216e+06	1.56088e+06
510.386861823245/8.40025	1.57813e+06	2.39261e+06	2.21385e+06	2.34519e+06	2.06701e+06	1.42969e+06	1.96293e+06	2.42096e+06	1.50967e+06	2.40879e+06	2.52635e+06	2.46074e+06	1.60951e+06	2.29771e+06	2.5764e+06	2.11659e+06	1.47857e+06	2.22977e+06	1.82406e+06	4.02978e+06	2.76013e+06	2.026e+06	2.09361e+06	3.17235e+06	1.76771e+06	3.78255e+06	2.2569e+06	3.08303e+06	2.42892e+06	1.96159e+06
298.274879516748/12.7035	2.79897e+06	3.15987e+06	2.78813e+06	3.76524e+06	1.90214e+06	2.69337e+06	3.45455e+06	1.65762e+06	2.80805e+06	1.35608e+06	1.19015e+06	2.48323e+06	2.08226e+06	1.325e+06	1.65179e+06	2.84971e+06	2.25209e+06	817431	1.72316e+06	1.30982e+06	4.03782e+06	504727	3.31731e+06	3.35847e+06	3.50606e+06	2.58606e+06	2.93479e+06	3.00485e+06	2.71637e+06	2.89116e+06
482.360864405058/16.6545	2.30009e+06	2.09842e+06	6.13975e+06	2.73223e+06	2.96873e+06	1.92273e+06	1.62808e+06	5.19039e+06	2.09563e+06	3.43343e+06	2.25904e+06	2.05357e+06	2.09129e+06	5.88827e+06	1.98649e+06	1.71006e+06	1.50893e+06	2.05309e+06	2.08929e+06	1.4631e+06	2.73482e+06	2.39337e+06	2.83905e+06	2.42881e+06	1.37485e+06	1.90574e+06	2.05726e+06	2.46501e+06	1.60261e+06	1.80295e+06
294.155322225368/2.748	9.09594e+06	8.17759e+06	3.08331e+06	4.10727e+06	7.44857e+06	9.1834e+06	6.85062e+06	5.47941e+06	1.24699e+07	9.5391e+06	5.69061e+06	6.37319e+06	5.69795e+06	4.74513e+06	5.74661e+06	1.05098e+07	1.16307e+07	1.16444e+07	8.04867e+06	6.16435e+06	1.21847e+07	1.24389e+07	1.20309e+07	1.42848e+07	1.36493e+07	1.44403e+07	9.13021e+06	6.66645e+06	1.04717e+07	1.19196e+07
280.139802604196/1.2985	2.88559e+06	3.02716e+06	1.07458e+06	1.72329e+06	2.97192e+06	3.32807e+06	2.73353e+06	2.29888e+06	3.84964e+06	3.43694e+06	2.21363e+06	2.64476e+06	2.05676e+06	1.95447e+06	2.41246e+06	4.41712e+06	4.45963e+06	3.20876e+06	2.71377e+06	2.15616e+06	2.28093e+06	3.06997e+06	3.08729e+06	3.50072e+06	3.55428e+06	3.02358e+06	2.76943e+06	3.35924e+06	2.87109e+06	1.95936e+06
645.382487444613/17.521	4.88251e+06	4.58154e+06	4.53203e+06	4.75359e+06	5.21955e+06	3.50881e+06	3.51276e+06	8.20382e+06	5.66001e+06	5.37306e+06	3.64816e+06	3.89458e+06	7.50285e+06	3.99097e+06	4.12716e+06	5.10491e+06	9.6462e+06	5.30616e+06	2.83106e+06	3.86715e+06	4.45016e+06	4.26201e+06	4.10209e+06	4.81768e+06	5.59613e+06	6.09716e+06	3.95679e+06	3.82199e+06	3.84713e+06	4.7186e+06
758.570930913473/24.5024166666667	0	0	284169	0	2.1028e+06	1.59474e+06	1.69073e+06	4.54281e+06	8.34007e+06	1.25004e+07	4.24199e+06	1.9612e+07	3.03999e+07	2.31797e+06	1.43456e+07	1.47165e+07	3.03372e+07	36296.7	80668.5	6.42243e+06	0	0	250658	0	1.46971e+06	3.93344e+06	1.40205e+06	2.39824e+06	8.28645e+06	1.46111e+06
782.567993698663/21.0883333333333	0	0	70323.7	926543	3.76566e+07	1.26781e+07	4.79055e+06	2.83568e+06	1.51556e+07	5.69826e+06	3.80267e+06	2.45509e+06	1.7162e+06	3.68167e+06	2.35871e+06	1.60209e+06	1.60541e+06	0	0	1.09733e+06	0	0	39739.2	343355	2.02567e+06	5.87654e+06	3.5936e+06	1.75319e+07	1.11714e+07	5.37009e+06
480.310250278958/16.2525833333333	2.20149e+06	2.39784e+06	7.97548e+06	4.09045e+06	1.77352e+06	1.72816e+06	1.93738e+06	4.43022e+06	2.95557e+06	2.84733e+06	1.21446e+06	1.6187e+06	6.4412e+06	1.75957e+06	1.47217e+06	1.96453e+06	2.85583e+06	1.28288e+06	1.65218e+06	1.53202e+06	3.27003e+06	1.83241e+06	1.94001e+06	3.33104e+06	2.59824e+06	2.19034e+06	1.75967e+06	1.40904e+06	1.45518e+06	1.86883e+06
344.228187127225/6.33366666666667	247238	3.90367e+06	3.1801e+06	298102	2.77375e+06	318127	372180	4.33129e+06	277934	4.33563e+06	3.86439e+06	467883	333406	4.24434e+06	5.37615e+06	307747	229276	411227	3.72619e+06	699171	321816	2.98795e+06	261640	4.25264e+06	296966	6.82067e+06	357167	6.67854e+06	3.14194e+06	619212
397.805392352802/8.10166666666667	1.63019e+06	2.21836e+06	2.05863e+06	2.20479e+06	2.29502e+06	1.67685e+06	1.90441e+06	2.16779e+06	1.58842e+06	2.3385e+06	2.30865e+06	2.01792e+06	1.77881e+06	2.10657e+06	2.28888e+06	2.10714e+06	1.62223e+06	2.00324e+06	1.98085e+06	3.39377e+06	2.37704e+06	2.19091e+06	2.11381e+06	2.99945e+06	1.93766e+06	3.63502e+06	2.45362e+06	2.9964e+06	2.45498e+06	2.0318e+06
806.570843493864/20.63625	0	0	18348.1	1.44045e+07	5.3127e+06	6.39746e+06	1.59557e+06	5.12757e+06	2.07015e+06	4.32754e+06	3.37373e+07	4.52323e+06	5.36629e+06	3.1871e+06	5.0397e+06	2.98351e+06	3.90347e+06	0	0	1.1355e+08	0	0	0	1.38104e+07	8.37604e+06	3.64208e+06	2.44975e+06	2.56891e+06	2.61303e+06	2.17096e+06
906.68527826276/8.26783333333333	1.71269e+06	2.3371e+06	2.13469e+06	2.31544e+06	2.32441e+06	1.75545e+06	2.02794e+06	2.41138e+06	1.71996e+06	2.53568e+06	2.719e+06	2.56488e+06	1.99154e+06	2.67282e+06	2.67949e+06	2.54942e+06	2.00061e+06	2.39571e+06	2.18147e+06	3.98185e+06	2.27247e+06	1.89393e+06	1.99935e+06	2.68874e+06	1.75229e+06	3.24942e+06	2.15207e+06	2.73046e+06	2.19642e+06	1.78269e+06
959.611656809092/16.6261666666667	1.98182e+06	2.03683e+06	9.77783e+06	4.19753e+06	1.539e+06	1.11315e+06	1.37797e+06	5.53889e+06	2.25249e+06	2.76465e+06	1.03093e+06	1.28024e+06	7.82585e+06	1.67962e+06	1.15955e+06	1.44655e+06	2.42894e+06	1.19137e+06	1.49484e+06	1.30194e+06	2.99008e+06	1.48777e+06	1.61071e+06	3.37836e+06	1.89554e+06	1.59502e+06	1.16333e+06	722916	772379	1.06456e+06
758.57124214864/22.1551666666667	0	0	0	25657.2	2.69268e+07	3.72572e+06	6.67411e+06	6951181	5.26043e+06	1.33986e+07	4.46135e+06	9.14193e+06	1.28063e+07	5.76497e+06	375042	9.74699e+06	1.06564e+07	0	0	2.67371e+06	0	0	0	0	2.35102e+07	1.29004e+07	6.65314e+06	6.08464e+06	9.76191e+06	3.57338e+06
130.08661646944/1.065	2.41268e+06	2.37046e+06	2.62533e+06	2.36459e+06	2.33594e+06	2.37067e+06	2.06093e+06	2.42819e+06	2.03373e+06	2.61354e+06	2.69151e+06	3.10328e+06	2.34345e+06	3.27318e+06	2.7146e+06	2.77616e+06	2.68751e+06	2.56141e+06	2.06189e+06	2.4213e+06	2.11671e+06	2.04736e+06	2.43206e+06	1.88347e+06	1.61646e+06	1.81074e+06	2.08084e+06	1.94563e+06	1.95335e+06	1.57732e+06
72.0817207207838/1.31266666666667	3.62349e+06	3.65143e+06	4.84976e+06	3.89752e+06	4.10297e+06	3.69569e+06	4.13042e+06	4.67943e+06	3.38313e+06	4.05753e+06	3.81736e+06	4.28485e+06	3.47092e+06	4.16786e+06	3.57718e+06	3.42072e+06	3.32827e+06	4.60701e+06	3.22976e+06	3.98138e+06	2.47744e+06	2.83696e+06	3.6176e+06	2.56543e+06	2.31136e+06	2.10652e+06	2.27225e+06	2.73797e+06	2.42917e+06	2.0929e+06
189.073994622161/5.766	3.70662e+06	3.1253e+06	3.68924e+06	2.70338e+06	2.96756e+06	3.22945e+06	2.6707e+06	3.47244e+06	2.82687e+06	3.98391e+06	3.4534e+06	4.40602e+06	2.47358e+06	4.57082e+06	3.39607e+06	4.5351e+06	3.95502e+06	3.93467e+06	2.39091e+06	3.14503e+06	3.10098e+06	3.03528e+06	3.53603e+06	2.65314e+06	2.19125e+06	2.32104e+06	2.57256e+06	2.83358e+06	2.62685e+06	2.13136e+06
496.538462891893/16.1128333333333	2.97956e+06	3.25404e+06	4.5955e+06	3.66949e+06	3.28064e+06	2.73839e+06	2.77296e+06	3.56674e+06	2.77218e+06	2.71311e+06	2.90753e+06	1.86524e+06	5.72538e+06	2.86396e+06	2.35743e+06	2.40277e+06	3.34167e+06	3.06379e+06	2.67072e+06	2.43953e+06	3.73042e+06	3.23584e+06	3.67807e+06	3.74391e+06	4.13118e+06	3.71113e+06	3.36374e+06	3.45222e+06	3.40852e+06	3.65022e+06
282.279452644813/21.3723333333333	2.66874e+06	2.94483e+06	4.094e+06	0	50570.6	109240	1.11403e+06	1.95838e+06	883348	2.04471e+06	0	86681.1	6.72188e+06	4454.84	1.32158e+06	1.45271e+06	1.29525e+06	7.4715e+06	3.86399e+06	0	7.22507e+06	3.67255e+06	2.60118e+06	0	93050.2	2.11478e+06	2.23807e+06	6.68903e+06	3.49628e+06	1.49524e+06
508.378139169005/17.2695	4.23947e+06	2.94645e+06	9.56979e+06	3.50615e+06	4.09177e+06	2.41792e+06	1.98512e+06	8.51758e+06	2.39691e+06	5.62403e+06	3.19806e+06	1.77219e+06	2.98592e+06	4387962	1.88054e+06	1.88403e+06	1.56296e+06	2.63352e+06	2.18532e+06	1.6577e+06	3.12531e+06	2.44733e+06	2.21927e+06	2.40612e+06	1.45262e+06	1.8787e+06	1.85847e+06	2.45782e+06	1.59918e+06	1.57877e+06
494.325879418525/14.758	4.71639e+06	5.43642e+06	5.72163e+06	3.45824e+06	1.48074e+06	1.4124e+06	1.4094e+06	1.41489e+06	2.62302e+06	1.44661e+06	453176	365474	3.52096e+06	425782	445586	738669	1.82907e+06	970385	507996	547244	8.49422e+06	4.59092e+06	4.08242e+06	2.79405e+06	8.7512e+06	5.07798e+06	3.07278e+06	3.60257e+06	5.43771e+06	1.73323e+06
690.362605261774/15.6914166666667	5.79139e+06	5.47377e+06	2.36821e+06	9.80397e+06	5.09112e+06	4.54902e+06	5.98e+06	8.0473e+06	4.31928e+06	1.03022e+07	838845	1.40074e+06	448754	749268	1.30142e+06	2.2404e+06	3.19061e+06	1.96446e+06	934153	2.08192e+06	2.29802e+06	3.5699e+06	3.30988e+06	7.47927e+06	7.83933e+06	5.08499e+06	2.64244e+06	9.6192e+06	3.90765e+06	4.93015e+06
227.139216976953/10.465	3.01961e+06	2.24969e+06	2.643e+06	1.74145e+06	3.20965e+06	3.32371e+06	2.99278e+06	2.64745e+06	3.57396e+06	3.52093e+06	1.50686e+06	1.91594e+06	2.83014e+06	2.20071e+06	2.58247e+06	1.9828e+06	1.35422e+06	3.1412e+06	2.18337e+06	3.50726e+06	2.20347e+06	1.96219e+06	1.7261e+06	1.91697e+06	1.95573e+06	1.83899e+06	1.61495e+06	1.3115e+06	1.89216e+06	2.27933e+06
498.348034591497/16.10375	3.66139e+06	3.72851e+06	5.44826e+06	4.38877e+06	3.71373e+06	3.22778e+06	3.25821e+06	4.17695e+06	3.24607e+06	3.26299e+06	2.92153e+06	2.09717e+06	5.4794e+06	2.89501e+06	2.60032e+06	2.55124e+06	3.53772e+06	3.18649e+06	2.91131e+06	2.58154e+06	4.0689e+06	3.35553e+06	3.7321e+06	3.82112e+06	4.13647e+06	3.76814e+06	3.3749e+06	3.48397e+06	3.55047e+06	3.67632e+06
828.552087658617/24.47725	0	0	2.78344e+06	518550	7.58067e+06	405462	5.51005e+06	6.79576e+06	3.69713e+06	3.08163e+06	680752	358367	2.38098e+06	131056	1.32714e+07	1.03353e+07	2.07742e+06	24120.2	359484	534388	0	0	3.193e+06	356749	8.45341e+06	8.04487e+06	5.91789e+06	6.0496e+06	4.69531e+06	5.14386e+06
462.34432954642/13.1860833333333	4.70265e+06	5.4445e+06	2.03345e+06	3.63755e+06	5.14105e+06	5.94611e+06	5.60135e+06	3.21211e+06	4.97494e+06	4.87113e+06	2.77757e+06	3.46315e+06	2.31944e+06	2.2513e+06	3.15145e+06	6.17608e+06	5.56522e+06	2.81838e+06	2.8443e+06	3.71057e+06	4.20191e+06	4.39256e+06	4.61021e+06	4.51101e+06	5.13352e+06	5.06629e+06	5.11367e+06	5.85321e+06	4.75744e+06	3.58802e+06
564.360407895432/7.35816666666667	207393	2.65519e+06	2.62444e+06	72845.6	1.69836e+06	123123	202390	4.28733e+06	140442	4.3277e+06	3.29694e+06	171841	119209	3.58817e+06	2.22269e+06	70523.1	56997	313107	1.44338e+06	279372	191944	2.71544e+06	104223	3.63789e+06	172898	7.76995e+06	251879	6.06658e+06	2.72951e+06	506021
329.143374617903/4.91583333333333	5.07663e+06	4.52858e+06	2.72462e+06	3.57375e+06	5.19591e+06	4.70167e+06	5.21976e+06	4.50967e+06	5.15281e+06	5.7391e+06	4.3684e+06	5.97027e+06	5.25363e+06	4.87408e+06	5.4403e+06	8.16721e+06	7.24195e+06	5.8308e+06	4.80036e+06	5.17228e+06	3.82218e+06	5.69005e+06	4.25685e+06	5.98183e+06	5.76388e+06	4.25326e+06	4.42602e+06	5.69902e+06	4.18552e+06	3.0796e+06
430.296960241374/10.8453333333333	3.20491e+06	1.49448e+06	1.32945e+06	2.528e+06	5.02821e+06	2.43497e+06	1.87108e+06	3.03941e+06	2.00559e+06	4.57875e+06	2.13351e+06	3.2896e+06	2826994	2.00398e+06	3.53488e+06	2.74497e+06	2.31074e+06	2.29036e+06	3.39446e+06	1.96449e+06	1.57673e+06	2.325e+06	1.68448e+06	1.6238e+06	2.38699e+06	6.0564e+06	2.69659e+06	4.12601e+06	1.33081e+06	1.15837e+06
479.297862649021/15.2685	2.04301e+06	1.96394e+06	4.21294e+06	3.81728e+06	1.51886e+06	1.45365e+06	1.62024e+06	1.87522e+06	2.1037e+06	803909	1.60735e+06	2.71769e+06	5.93935e+06	1.30458e+06	2.62114e+06	3.11374e+06	4.76372e+06	1.41972e+06	2.19364e+06	2.0861e+06	3.41263e+06	2.02507e+06	1.95e+06	3.37311e+06	2.31934e+06	1.79963e+06	1.57319e+06	1.34628e+06	1.58101e+06	1.66887e+06
760.582896707883/21.3395	0	0	0	0	4.19442e+06	3.58041e+06	1.08026e+07	4.96748e+06	9.44224e+06	1.16356e+07	2.27166e+06	6.70921e+06	2.77378e+06	2.69801e+06	1.48117e+07	1.23238e+07	1.01996e+07	13908.2	29463.4	631052	5008.89	22610.9	0	0	3.77285e+06	1.34998e+07	1.53627e+07	7.79057e+06	9.31931e+06	8.06347e+06
526.379441853582/18.488	3.89577e+06	4.18216e+06	4.35892e+06	4.11057e+06	3.42517e+06	3.29613e+06	2.86094e+06	3.37297e+06	3.03006e+06	3.63417e+06	2.53309e+06	2.32651e+06	4.61163e+06	2.40129e+06	2.67779e+06	2.88699e+06	3.39986e+06	2.76694e+06	3.07716e+06	2.50763e+06	4.28033e+06	3.9556e+06	3.76515e+06	4.05028e+06	4.35309e+06	4.24913e+06	3.68244e+06	3.59797e+06	3.47454e+06	3.74278e+06
295.150247020181/1.0815	1.88657e+06	1.98282e+06	1.05963e+06	1.59815e+06	2.3688e+06	2.39794e+06	1.59229e+06	1.42592e+06	1.44859e+06	2.41479e+06	2.65643e+06	2.95815e+06	1.78735e+06	3.07398e+06	2.96162e+06	4.87815e+06	3.7983e+06	3.47169e+06	2.14294e+06	2.27144e+06	934254	1.02847e+06	1.47956e+06	1.10749e+06	1.11267e+06	955595	999951	1.1979e+06	1.12733e+06	743045
572.372715569014/17.021	6.16686e+06	3.00031e+06	3.2264e+06	2.57235e+06	2.76688e+06	2.02219e+06	2.23846e+06	4.66579e+06	1.77283e+06	4.6693e+06	1.00731e+06	999394	1.98364e+06	1.25765e+06	1.22225e+06	1.90667e+06	2.29648e+06	2.18125e+06	1.34766e+06	1.79026e+06	2.70793e+06	2.92646e+06	1.68395e+06	1.89823e+06	2.35217e+06	2.80407e+06	1.53939e+06	2.10116e+06	2.28676e+06	1.16074e+06
782.569144612479/24.48125	0	0	78300.3	1.37752e+07	4.26884e+06	3.91085e+06	7.74023e+06	3.28258e+06	5.78342e+06	6.47683e+06	3.76509e+06	1.32424e+06	2.17167e+06	3.58073e+06	3.19853e+06	1.55956e+06	2.62167e+06	39542.8	110166	6.34828e+06	0	0	144854	1.44913e+07	3.19568e+06	6.57812e+06	6.84207e+06	6.37478e+06	6.42259e+06	5.91192e+06
782.57075767742/22.7396666666667	0	0	87218.2	3.04512e+06	2.93762e+06	4.66034e+06	3.05905e+07	7.56445e+06	7.49228e+06	5.19651e+06	2.26242e+06	4.51773e+06	4.27161e+06	3.67187e+06	1.34072e+07	1.11491e+07	4.44549e+06	0	61542	2.92152e+06	0	0	76667.1	6.47847e+06	4.40965e+06	9.60218e+06	9.28997e+06	5.72982e+06	6.8544e+06	8.98548e+06
133.105476221199/2.56583333333333	1.62555e+07	1.41291e+07	1.74911e+07	1.37628e+07	1.51506e+07	1.49079e+07	1.29224e+07	1.67985e+07	1.23391e+07	1.77127e+07	1.67587e+07	2.04692e+07	1.4484e+07	2.11235e+07	1.62609e+07	1.93914e+07	1.78137e+07	1.88541e+07	1.16087e+07	1.55174e+07	1.29834e+07	1.23536e+07	1.43953e+07	1.11381e+07	5.71042e+06	9.87067e+06	1.10091e+07	6.27306e+06	3.54679e+06	8.95277e+06
780.553456587067/21.6566666666667	0	0	1.96314e+06	362069	5.28802e+06	3.38348e+06	7.0931e+06	1.87423e+07	6.77438e+06	1.0785e+07	3.93108e+06	3.01766e+06	1.72529e+07	2.64583e+06	1.91856e+06	1.19454e+07	9.09887e+06	0	823991	4.06532e+06	0	0	2.40616e+06	334040	4.07209e+06	1.39464e+07	6.74987e+06	5.13158e+06	6.20732e+06	5.17616e+06
150.058379395994/1.5745	7.01926e+06	6.59966e+06	7.28157e+06	6.17717e+06	6.54119e+06	6.93349e+06	5.33138e+06	7.7323e+06	5.29194e+06	7.28981e+06	7.73862e+06	8.48095e+06	5.63745e+06	9.38506e+06	6.53103e+06	7.67665e+06	7.32712e+06	9.62781e+06	5.60197e+06	6.49628e+06	4.36988e+06	4.53931e+06	5.4372e+06	4.14912e+06	3.21217e+06	2.65752e+06	2.97446e+06	3.89666e+06	3.59804e+06	2.93827e+06
688.347578074413/14.4146666666667	2.48302e+06	3.91084e+06	866262	3.0218e+06	3.57756e+06	3.92894e+06	3.4348e+06	1.52561e+06	4.8391e+06	1.93076e+06	4.09131e+06	3.3819e+06	4.17913e+06	2.3337e+06	3.87537e+06	6.01538e+06	6.39393e+06	3.91327e+06	2.69826e+06	4.88598e+06	3.03068e+06	2.78674e+06	2.90785e+06	3.36111e+06	5.82026e+06	3.98206e+06	2.5835e+06	3.65715e+06	5.27398e+06	2.54284e+06
133.032223862129/1.382	2.99456e+06	2.66709e+06	3.32903e+06	2.67258e+06	2.81367e+06	2.75661e+06	2.6499e+06	3.11477e+06	2.39131e+06	3.27698e+06	3.12351e+06	3.29808e+06	2.67957e+06	3.44143e+06	2.79705e+06	3.02603e+06	2.77517e+06	3.55607e+06	2.47626e+06	3.06248e+06	2.33287e+06	2.38824e+06	2.54083e+06	2.04445e+06	1.72485e+06	1.96184e+06	2.09456e+06	2.31793e+06	2.16531e+06	1.77298e+06
760.583292956028/21.0641666666667	0	0	0	3355.5	2.40831e+06	4.9411e+06	8.68611e+06	2.30478e+06	1.65875e+07	23143555	9.34977e+06	1.14076e+07	3.08538e+06	2.91156e+06	4.38047e+06	3.59002e+06	3.33009e+06	0	0	68573.1	0	0	0	0	3.74866e+06	1.03496e+07	6.08678e+06	6.87324e+06	7.25509e+06	6.64726e+06
701.496027174641/7.917	2.9291e+06	3.30868e+06	3.14138e+06	3.1717e+06	3.36944e+06	3.0067e+06	3.0392e+06	3.25013e+06	2.91663e+06	3.45016e+06	2.81833e+06	2.60298e+06	2.46235e+06	2.73624e+06	2.64962e+06	2.7252e+06	2.44968e+06	2.61064e+06	2.5658e+06	3.1998e+06	3.2104e+06	3.18314e+06	3.11725e+06	3.53372e+06	2.97858e+06	3.56515e+06	3.10089e+06	3.59419e+06	3.24744e+06	3.0214e+06
528.310273289405/15.7786666666667	2.12179e+06	1.54224e+06	4.46996e+06	3.21768e+06	1.32667e+06	947124	1.3781e+06	1.96327e+06	1.72445e+06	866165	1.39596e+06	2.06553e+06	4.56393e+06	1.67493e+06	2.05544e+06	2.02952e+06	2.36001e+06	1.85601e+06	1.93631e+06	3.11708e+06	2.83466e+06	1.42998e+06	1.47972e+06	1.89829e+06	3.09262e+06	1.40839e+06	1.2981e+06	952177	1.86448e+06	1.27372e+06
412.289151116175/20.60225	2.8997e+06	1.83509e+06	3.59705e+06	137829	244874	876293	793804	1.87971e+06	487549	1.19035e+06	27388	5.42229e+06	5.75722e+06	355549	5.62787e+06	3.64791e+06	2.37319e+06	7.47963e+06	3.9701e+06	5.18774e+06	1.14072e+06	1.60727e+06	873402	668083	3967.22	435336	324781	348880	364249	186223
524.363571700754/16.7323333333333	4.17912e+06	4.61588e+06	4.79294e+06	4.10948e+06	2.87188e+06	3.21464e+06	3.21841e+06	3.7187e+06	3.57854e+06	3.25741e+06	1.54367e+06	1.43301e+06	3.73391e+06	1.17186e+06	2.01638e+06	2.40553e+06	3.3861e+06	1.75452e+06	1.41114e+06	1.66698e+06	4.4854e+06	3.82444e+06	2.82708e+06	3.92406e+06	3.82564e+06	3.72861e+06	2.77987e+06	2.8849e+06	3.14361e+06	2.45012e+06
689.350845141612/14.803	2.31384e+06	5.11902e+06	985103	3.36373e+06	3.39613e+06	2.99813e+06	3.78645e+06	2.05431e+06	2.5508e+06	2.26729e+06	3.41183e+06	2.24121e+06	4.88137e+06	2.12602e+06	4.09976e+06	5.93561e+06	5.30756e+06	3.33161e+06	2.23221e+06	4.42355e+06	3.77546e+06	4.06064e+06	2.11802e+06	2.47321e+06	3.21735e+06	2.7801e+06	2.05862e+06	1.68435e+06	5.78597e+06	1.72882e+06
454.346824084101/8.267	1.27126e+06	1.82711e+06	1.65152e+06	1.80044e+06	1.6904e+06	1.18391e+06	1.52801e+06	1.79132e+06	1.21709e+06	1.85845e+06	1.88812e+06	1.70189e+06	1.3043e+06	1.7086e+06	1.87995e+06	1.65796e+06	1.19951e+06	1.6454e+06	1.49137e+06	2.96848e+06	2.03255e+06	1.67279e+06	1.67539e+06	2.41244e+06	1.45188e+06	2.96793e+06	1.93796e+06	2.40522e+06	1.94257e+06	1.5465e+06
308.091592588085/1.299	477937	3.1862e+06	852009	4.92685e+06	1.59275e+06	3.73515e+06	2.91676e+06	154552	3.8806e+06	885137	120936	501527	1.32959e+06	33476.7	1.14756e+06	866182	1.21405e+06	157745	786455	130002	4.95094e+06	1.40631e+06	4.84647e+06	5.57894e+06	6.77806e+06	3.54388e+06	5.75157e+06	2.39181e+06	4.59062e+06	7.00574e+06
235.165390653871/1.19891666666667	1.97081e+06	1.14596e+06	2.0746e+06	1.00135e+06	3.32561e+06	1.52047e+06	1.55029e+06	2.4814e+06	1.00727e+06	2.79737e+06	160838	718565	240235	380205	533039	1.37722e+06	339192	846229	487270	170491	606547	416165	950815	563095	675623	1.48909e+06	731581	2.58923e+06	3.08041e+06	1.35703e+06
121.084433772631/4.74916666666667	4.77649e+06	4.34647e+06	5.05478e+06	4.13869e+06	4.41329e+06	4.50903e+06	3.92288e+06	4.6665e+06	3.95101e+06	5.06372e+06	5.26491e+06	6.25556e+06	4.62798e+06	6.60724e+06	5.07125e+06	6.02256e+06	5.62784e+06	5.31317e+06	3.9805e+06	4.80419e+06	4.04231e+06	4.02413e+06	4.45433e+06	3.73206e+06	3.28356e+06	3.44529e+06	3.81898e+06	3.93007e+06	3.72954e+06	3.17321e+06
523.360430238431/16.97375	5.8685e+06	596385	9.63237e+06	8.01888e+06	4.36687e+06	4.09502e+06	3.91688e+06	4.71837e+06	5.40687e+06	322085	673471	936400	4.12624e+06	888093	204003	1.39086e+06	2.74302e+06	1.95861e+06	1.07037e+06	1.08039e+06	6.60218e+06	5.17754e+06	4.17443e+06	6.09018e+06	6.46922e+06	5.28426e+06	4.0099e+06	3.72641e+06	3.85796e+06	3.66445e+06
814.580011827958/8.117	3.14361e+06	3.31986e+06	3.19634e+06	3.26845e+06	3.45873e+06	3.06856e+06	3.19337e+06	3.32834e+06	3.03983e+06	3.46268e+06	2.89235e+06	2.7146e+06	2.50813e+06	2.89541e+06	2.7654e+06	2.77527e+06	2.58317e+06	2.80342e+06	2.67886e+06	3.23475e+06	3.36023e+06	3.21667e+06	3.24706e+06	3.49708e+06	3.05918e+06	3.68965e+06	3.2519e+06	3.66707e+06	3.32262e+06	3.02735e+06
511.361058751312/17.2621666666667	2.42522e+06	2.58542e+06	4.16132e+06	3.4388e+06	1.88771e+06	1.90658e+06	1.90819e+06	2.171e+06	1.97772e+06	1.68495e+06	1.1923e+06	1.496e+06	6.19027e+06	1.60511e+06	1.78042e+06	2.01875e+06	3.1986e+06	1.53882e+06	2.24881e+06	1.29608e+06	2.56169e+06	2.02144e+06	2.61767e+06	2.85509e+06	3.46211e+06	2.60195e+06	1.7102e+06	1.64681e+06	2.01532e+06	2.07811e+06
759.57486565847/20.294	0	0	0	0	390295	5.62192e+06	5.73508e+06	6.09189e+06	3.68571e+06	6.18843e+06	1.53925e+07	6.98581e+06	1.06592e+07	1.22884e+07	294791	8.55975e+06	6.80652e+06	0	0	0	0	0	0	0	5.76974e+06	5.2068e+06	4.29364e+06	4.35162e+06	4.02029e+06	4.90217e+06
524.575233632767/18.488	3.20352e+06	3.16303e+06	3.48913e+06	3.38704e+06	2.69644e+06	2.57539e+06	1.93168e+06	2.45295e+06	2.22878e+06	2.8261e+06	1.99982e+06	1.84969e+06	3.99518e+06	1.71915e+06	2.07506e+06	2.3541e+06	2.79246e+06	2.24167e+06	2.51307e+06	1.71796e+06	3.08627e+06	3.10275e+06	2.58734e+06	3.12567e+06	3.44801e+06	3.68358e+06	2.94842e+06	2.93168e+06	2.99051e+06	3.19571e+06
804.553072254302/22.1715	0	0	663122	4.42734e+06	2.20292e+06	9.95214e+06	4.19521e+06	4.67189e+06	3.92857e+06	3729998	3.15478e+06	1.07784e+07	3.03336e+06	3.09654e+07	4.98013e+06	3.69784e+06	2.60761e+06	0	656768	1.49058e+06	0	0	332084	7.15392e+06	1.07805e+07	3.57957e+06	2.96878e+06	3.41215e+06	3.04204e+06	2.57215e+06
353.267490082947/21.2018333333333	1.6396e+06	1.05764e+06	1.66023e+06	8.64796e+06	3.00634e+06	27451.7	57795.4	143992	34391.4	109574	4.12292e+06	4.66529e+06	77925.3	4.59458e+06	121608	52396.9	42610	1.77224e+06	645650	7.97228e+06	1.49284e+06	1.7947e+06	958668	9.49856e+06	6.77178e+06	87783	76861.8	30033.5	49584.7	62488.8
704.580437188785/24.57	0	0	5.1994e+06	607799	5.89876e+06	6.20317e+06	4.82068e+06	6.83577e+06	4.90864e+06	4.81238e+06	0	4.08348e+06	3.74482e+06	8.56779e+06	5.49225e+06	4.13866e+06	3.77157e+06	0	557637	869610	0	0	3.99175e+06	556379	5.12354e+06	5.49852e+06	4.85139e+06	5.06114e+06	4.92481e+06	5.68043e+06
786.165740269552/5.76691666666667	1.71227e+06	2.02728e+06	2.02542e+06	2.45986e+06	2.15356e+06	2.10406e+06	2.12668e+06	1.11988e+06	1.94386e+06	1.62056e+06	1.37209e+06	1.62618e+06	1.73481e+06	1.65523e+06	2.13121e+06	1.77306e+06	1.8285e+06	1.36543e+06	1.94566e+06	1.99291e+06	2.0717e+06	1.78486e+06	2.43827e+06	2.13722e+06	2.03887e+06	2.23833e+06	2.39912e+06	2.15373e+06	1.9292e+06	2.12602e+06
415.255414672451/6.817	164823	2.66315e+06	1.90888e+06	105258	1.58726e+06	53365.9	48708.5	2.85641e+06	123676	2.92964e+06	2.83528e+06	213548	142567	3.1627e+06	3.75457e+06	141952	123263	284743	2.5502e+06	343320	129308	1.84154e+06	105087	2.88382e+06	128367	6.27804e+06	148461	5.94197e+06	2.09451e+06	301593
780.553246860884/20.3541666666667	0	0	0	400504	1.07077e+06	3.20883e+06	3.3161e+06	5.4466e+06	2.14443e+06	3.44146e+06	9.22811e+06	6.00942e+06	1.0329e+07	1.19327e+07	455961	7.20831e+06	5.56911e+06	0	48737.3	738912	0	0	0	488022	4.10575e+06	3.08487e+06	3.24035e+06	3.18451e+06	3.16065e+06	2.89269e+06
522.557995650152/16.737	3.50414e+06	3.10623e+06	4.34288e+06	3.89607e+06	2.27863e+06	2.6439e+06	2.69589e+06	3.03601e+06	3.13783e+06	2.74047e+06	994814	766870	3.30477e+06	669751	1.09617e+06	1.73287e+06	2.79507e+06	1.08777e+06	905848	1.22654e+06	4.08084e+06	3.30908e+06	2.26593e+06	3.33402e+06	3.16917e+06	3.01116e+06	2.21384e+06	2.27552e+06	2.63792e+06	1.80939e+06
482.325897876477/15.03125	2.24033e+06	2.00304e+06	5.56468e+06	3.48941e+06	2.1298e+06	1.48363e+06	1.88804e+06	3.35158e+06	2.07065e+06	2.26295e+06	908659	1.2464e+06	4.82111e+06	1.30395e+06	1.30001e+06	1.28515e+06	1.75742e+06	1.64816e+06	1.84082e+06	1.04717e+06	1.59734e+06	1.23633e+06	2.40991e+06	1.83902e+06	2.51146e+06	1.88528e+06	1.5646e+06	1.62443e+06	1.94751e+06	2.30145e+06
328.321741439947/22.2865	4.86563e+06	4.44978e+06	9.21957e+06	0	0	0	2.72677e+06	1.59363e+06	2.81529e+06	2.07236e+06	0	0	1.63747e+06	0	1.60343e+06	877543	1.06928e+06	1.33384e+06	2.4013e+06	0	5.1692e+06	2.38892e+06	3.52398e+06	0	0	2.20557e+06	1.20754e+06	1.34478e+06	2.33591e+06	1.50928e+06
276.144665893477/3.01333333333333	5.36258e+06	4.94714e+06	1.01058e+06	2.28238e+06	3.84325e+06	5.14508e+06	4.8277e+06	4.08015e+06	6.59376e+06	4.79504e+06	4.22578e+06	3.61707e+06	4.0626e+06	2.67285e+06	3.56272e+06	8.68486e+06	6.95452e+06	3.29593e+06	3.71327e+06	3.53777e+06	5.68757e+06	6.27797e+06	5.98635e+06	7.51246e+06	9.14162e+06	1.04105e+07	5.81996e+06	5.05403e+06	7.18334e+06	5.66269e+06
371.228771185261/6.6	150085	2.6104e+06	1.93057e+06	119783	1.57979e+06	140334	169809	2.76988e+06	129233	2.83833e+06	2.80857e+06	225754	161996	3.07801e+06	3.58481e+06	144552	112988	244077	2.52917e+06	363671	145950	1.87513e+06	111904	2.81817e+06	133743	5.79686e+06	169368	5.63874e+06	2.05876e+06	319250
203.05273261866/1.18158333333333	1.78439e+06	1.7831e+06	476557	1.05473e+06	1.19403e+06	1.55028e+06	2.25283e+06	897409	2.31147e+06	1.19708e+06	651934	782155	803378	340601	732768	916715	1.17206e+06	807423	1.1979e+06	974383	2.02032e+06	2.22712e+06	1.85638e+06	2.30072e+06	2.53716e+06	2.57447e+06	1.88973e+06	1.77488e+06	1.90912e+06	2.78323e+06
665.349967531226/14.7658333333333	3.80309e+06	4.89958e+06	2.88381e+06	6.02727e+06	1.24223e+06	4.4113e+06	2.60666e+06	3.29666e+06	5.21656e+06	1.66563e+06	1.71447e+06	2.70734e+06	1.54342e+06	1.28808e+06	2.96393e+06	4.65141e+06	5.31983e+06	2.00981e+06	2.06185e+06	2.30251e+06	4.46426e+06	3.85797e+06	3.58925e+06	5.52782e+06	6.54417e+06	1.65406e+06	3.34319e+06	3.84909e+06	4.48794e+06	2.93159e+06
568.341203175879/15.5761666666667	1.70508e+06	4.89019e+06	1.19678e+06	2.58582e+06	5.93434e+06	1.76099e+06	4.33639e+06	3.64329e+06	1.13912e+06	3.32412e+06	2.14831e+06	2.51135e+06	3.23475e+06	1.73339e+06	3.6171e+06	6.12315e+06	8.97937e+06	2.26776e+06	3.56041e+06	2.50516e+06	1.51086e+06	5.50859e+06	1.72868e+06	1.49195e+06	5.47619e+06	5.20922e+06	1.27191e+06	1.95645e+06	5.22204e+06	1.26378e+06
527.298014201356/15.0086666666667	1.45453e+06	1.87464e+06	1.59471e+06	2.27145e+06	1.93105e+06	1.86731e+06	1.7808e+06	1.16523e+06	1.52783e+06	1.09025e+06	2.43199e+06	2.14761e+06	2.3582e+06	1.86342e+06	2.1868e+06	1.75445e+06	1.21019e+06	1.61393e+06	1.64506e+06	2.31325e+06	1.38141e+06	1.65497e+06	1.95786e+06	1.41517e+06	2.30708e+06	1.79342e+06	1.5367e+06	2.09096e+06	2.26865e+06	2.29709e+06
760.579022708633/20.6233333333333	0	0	0	0	288911	2.07914e+06	6.93757e+06	2.48091e+06	6.86051e+06	1.6006e+07	4.86348e+06	3.81571e+06	5.55567e+06	4.14074e+06	3.12251e+06	2.61292e+06	3.8566e+06	0	0	41092.8	0	0	0	0	2.51833e+06	1.04786e+07	7.29411e+06	7.06452e+06	8.66587e+06	7.91307e+06
468.310000861783/14.032	2.2282e+06	2.14156e+06	4.87526e+06	3.42334e+06	1.31711e+06	1.22312e+06	1.15409e+06	2.41315e+06	1.96522e+06	1.57906e+06	242246	226275	2.31091e+06	247056	272443	458947	1.29828e+06	1.20571e+06	343532	297444	3.11767e+06	1.58965e+06	2.00513e+06	2.40232e+06	3.57377e+06	2.18289e+06	1.51516e+06	1.61565e+06	2.2904e+06	2.86047e+06
302.306157386723/14.1918333333333	2.29487e+06	1.95141e+06	2120439	1.73762e+06	2.01324e+06	1.34528e+06	1.61814e+06	2.52895e+06	1.18786e+06	2.43447e+06	3.20723e+06	1.6706e+06	1.82268e+06	2.32639e+06	1.55108e+06	1.57151e+06	866684	1.86081e+06	1.87737e+06	2.47784e+06	2.04204e+06	1.67316e+06	1.30002e+06	898665	1.14199e+06	1.56935e+06	1.76633e+06	1.80904e+06	1.30172e+06	1.00527e+06
326.3059489303/20.5386666666667	2.95388e+06	2.96369e+06	8.77738e+06	745376	59622.3	239705	2.51316e+06	3.55185e+06	2.14422e+06	2.33686e+06	2.07217e+06	2.43754e+06	2.88477e+06	203462	1.92513e+06	1.13393e+06	1.05462e+06	1.44575e+06	1.55202e+06	147846	3.29686e+06	1.68986e+06	2.20119e+06	65939.6	292649	2.85405e+06	1.62538e+06	1.4314e+06	1.64509e+06	1.06592e+06
464.284268974757/11.0648333333333	2.12097e+06	5.43223e+06	3.32641e+06	5.01809e+06	5.22269e+06	6.93966e+06	4.97014e+06	1.89049e+06	4.44155e+06	1.29099e+06	244365	1.02775e+06	673287	231622	715428	833063	1.05039e+06	358794	202969	80514.4	3.44893e+06	1.68231e+06	1.33709e+06	978483	2.43535e+06	9.44862e+06	3.47802e+06	4.80068e+06	1.00433e+06	3.32912e+06
328.285571889893/20.6016666666667	3.15598e+06	2.63458e+06	2.55663e+06	2.94428e+06	2.91505e+06	1.41043e+06	1.07603e+06	1.9614e+06	1.08573e+06	2.01477e+06	1.47863e+06	2.10425e+06	2.12744e+06	1.51833e+06	2.4191e+06	1.65998e+06	1.62097e+06	2.09182e+06	1.85924e+06	44986.1	1.79394e+06	2.85446e+06	1.29046e+06	1.27827e+06	10775.5	1.11564e+06	753289	840095	922256	696683
760.579035380739/21.6403333333333	0	0	0	0	2.62008e+06	1.97259e+06	1.00263e+07	3.27278e+06	7.62725e+06	1.14411e+07	4.28391e+06	3.17717e+06	3.6259e+06	1.94006e+06	1.43911e+07	1.05284e+07	7.97269e+06	28325.1	21640.3	1.24098e+06	0	5396.57	10835.4	0	2.81588e+06	1.34064e+07	9.26221e+06	7.74156e+06	9.35136e+06	1.35632e+07
806.571187732773/20.2436666666667	0	0	0	2.66683e+07	6.49207e+06	2.43359e+06	2.06055e+06	4.20749e+06	1.44585e+06	2.16771e+06	6.07316e+06	5.99231e+06	6.41919e+06	3.26594e+06	5.15373e+06	4.63631e+06	4.87974e+06	0	0	1.03202e+07	0	0	0	1.50978e+07	4.88874e+06	4.27024e+06	3.07952e+06	3.15255e+06	1.82257e+06	2.29973e+06
808.583589351467/24.507	0	0	191950	2.49674e+06	1.02811e+07	9.10437e+06	6.09887e+06	6.13015e+06	6.28606e+06	1.75413e+06	1.23584e+07	2.20445e+06	2.31668e+06	9.01212e+06	4.73896e+06	3.72337e+06	2.39833e+06	34544	342891	1.1071e+07	0	0	148272	2.30403e+06	9.10016e+06	6.08719e+06	5.25573e+06	5.51713e+06	4.72839e+06	4.69158e+06
338.342639915463/19.7844166666667	655375	5.62485e+06	7.90607e+06	1.01012e+07	9.17513e+06	6.60398e+06	9.73714e+06	7.4282e+06	5.01751e+06	2.48974e+06	1.18591e+07	1.13306e+07	2.88589e+06	6.63779e+06	3.95535e+06	4.96625e+06	4.33565e+06	632613	1.07948e+07	71851.9	707558	1.01184e+07	2.95393e+06	8.8614e+06	1.35756e+07	5.93593e+06	4.96157e+06	6.46107e+06	15306600	7.82526e+06
467.321454265386/10.8461666666667	2.53256e+06	1.2521e+06	1.03247e+06	2.12574e+06	4.03072e+06	1.90126e+06	1.4292e+06	2.42627e+06	1.55148e+06	3.56576e+06	1.63762e+06	2.51888e+06	2.15032e+06	1.52398e+06	2.68643e+06	2.09354e+06	1.74877e+06	1.80098e+06	2.6534e+06	1.48838e+06	1.22635e+06	1.78522e+06	1.28787e+06	1.24448e+06	1.79837e+06	4.41986e+06	1.98902e+06	3.06172e+06	946440	835295
804.552917458785/22.6376666666667	6830.58	0	1.05607e+06	1.89992e+06	3.73762e+06	1.62264e+06	5.73491e+06	4.39662e+06	5.43372e+06	2.89179e+06	460734	1.78656e+06	7.12965e+06	3.55576e+06	7.25523e+06	4.59866e+06	2.99257e+06	0	320202	1.35947e+06	0	0	483843	1.37254e+06	3.64935e+06	4.78068e+06	6.72105e+06	7.07823e+06	6.81346e+06	6.33738e+06
807.574156508384/24.4921666666667	0	5455.51	587452	7.2762e+06	6.74876e+06	6.85093e+06	5.23384e+06	3.33505e+06	3.85021e+06	2.26382e+06	1.62707e+07	5.99039e+06	2.78412e+06	3.34083e+06	9.08709e+06	3.31631e+06	4.04709e+06	0	1.23063e+06	1.54069e+07	0	0	771046	8.56683e+06	6.68063e+06	4.60372e+06	5.4478e+06	4.63122e+06	3.63268e+06	4.95506e+06
130.050254452345/1.50833333333333	2.84922e+06	3.01139e+06	3.1756e+06	2.97191e+06	4.00612e+06	2.9402e+06	2.64727e+06	3.495e+06	2.89648e+06	3.20018e+06	3.07071e+06	3.55298e+06	3.67066e+06	3.41932e+06	3.52199e+06	3.02121e+06	3.13835e+06	5.68597e+06	5.42306e+06	4.02917e+06	2.66886e+06	2.44589e+06	3.01973e+06	2.55768e+06	2.63585e+06	2.65029e+06	3.13249e+06	2.99109e+06	2.71569e+06	2.70518e+06
806.570071749675/21.0091666666667	0	0	0	3.31347e+07	3.31546e+06	1.83e+06	1.15538e+06	3.89285e+06	2.76566e+06	1.53573e+06	1.92211e+06	3.229e+06	2.08289e+06	3.40433e+06	8.99609e+06	1.74026e+06	1.77144e+06	0	0	2.8509e+06	0	0	0	3.04116e+07	4.02108e+06	1.92526e+06	1.68946e+06	1.42775e+06	1.131e+06	1.0919e+06
274.423502798122/11.50125	1.50316e+06	1.61878e+06	1.65715e+06	1.85409e+06	1.63382e+06	1.8047e+06	1.6691e+06	1.44212e+06	1.67305e+06	1.6921e+06	2.25034e+06	2.53697e+06	2.20084e+06	2.41238e+06	2.60478e+06	2.36317e+06	2.43604e+06	1.89519e+06	2.65427e+06	2.46211e+06	2.00233e+06	1.31913e+06	1.59695e+06	1.53878e+06	1.92528e+06	1.36114e+06	1.60358e+06	1.38103e+06	1.52694e+06	1.66626e+06
182.081159404836/1.93816666666667	6.34972e+06	5.58869e+06	5.67335e+06	4.89591e+06	4.56505e+06	5.52629e+06	5.43282e+06	5.79849e+06	4.43642e+06	5.87798e+06	3.79905e+06	4.18064e+06	3.55317e+06	3.94974e+06	3.62272e+06	3.96011e+06	4.13824e+06	9.06291e+06	5.17585e+06	3.9146e+06	4.52582e+06	4.66974e+06	4.22678e+06	3.6595e+06	2.70704e+06	3.22533e+06	3.84044e+06	3.74258e+06	3.1933e+06	2.89424e+06
483.329133547492/17.921	1.74092e+06	1.75133e+06	4.71265e+06	2.85528e+06	1.732e+06	1.17467e+06	1.24121e+06	3.68712e+06	1.22844e+06	1.67443e+06	1.70358e+06	1.64845e+06	4.38318e+06	2.33371e+06	1.60451e+06	1.52327e+06	1.68168e+06	1.71455e+06	1.43707e+06	1.50873e+06	2.38207e+06	1.99549e+06	1.93986e+06	1.98372e+06	2.15883e+06	1.97635e+06	1.62254e+06	1.51068e+06	1.61629e+06	1.76501e+06
664.347234784104/14.4146666666667	2.59206e+06	4.12754e+06	1.30146e+06	3.37641e+06	2.37847e+06	3.72755e+06	3.45878e+06	1.55719e+06	4.5589e+06	2.28433e+06	1.03758e+06	1.35358e+06	2.21984e+06	532846	1.53377e+06	3.75135e+06	4.19239e+06	890950	897229	1.26846e+06	3.92159e+06	2.59313e+06	3.11637e+06	4.98234e+06	6.25098e+06	4.02798e+06	2.6045e+06	2.92695e+06	4.51306e+06	2.49896e+06
546.347929995894/15.412	2.30059e+06	2.52421e+06	2.38721e+06	2.4191e+06	1.95548e+06	2.28511e+06	2.27059e+06	1.84694e+06	2.08161e+06	2.18888e+06	1.23146e+06	1.20874e+06	1.62649e+06	1.0286e+06	1.31999e+06	1.4662e+06	1.71683e+06	1.10912e+06	1.23903e+06	1.26921e+06	2.29084e+06	2.36364e+06	1.9645e+06	2.15314e+06	2.79574e+06	2.52081e+06	1.88757e+06	2.08145e+06	2.35629e+06	1.86099e+06
459.280358586945/7.0245	118299	2.36391e+06	1.64284e+06	90069	1.40443e+06	116747	128463	2.49087e+06	102843	2.54327e+06	2.55236e+06	194128	123112	2.75832e+06	3.2963e+06	110778	95420.6	198366	2.2268e+06	289992	104159	1.625e+06	88648.1	2.55648e+06	110354	5.68358e+06	127221	5.34014e+06	1.86162e+06	266044
804.553432900194/21.37175	0	0	988431	2.18125e+06	4.70739e+06	8.31903e+06	9.16528e+06	8.20415e+06	7.4134e+06	5.80014e+06	300231	4.10104e+06	3.32938e+06	740236	286477	1.01245e+06	678084	5338.33	123039	1.79663e+06	0	0	858192	2.07821e+06	1.1685e+07	3.809e+06	6.67073e+06	8.28126e+06	7.49204e+06	9.18149e+06
132.20633008368/2.55941666666667	1.35618e+07	1.06795e+07	1.29659e+07	1.1559e+07	1.24863e+07	1.22818e+07	1.05948e+07	1.38144e+07	1.01074e+07	1.46416e+07	9.99187e+06	1.48734e+07	8.34269e+06	1.52793e+07	9.65684e+06	1.3999e+07	1.27682e+07	1.17861e+07	7.61089e+06	9.63667e+06	8.0583e+06	8.92189e+06	9.44538e+06	7.04625e+06	6.54748e+06	7.17913e+06	7.44531e+06	4.80821e+06	7.70231e+06	6.06187e+06
758.571696748426/18.8151666666667	0	0	0	352649	0	1.15928e+07	1.66695e+07	6.56708e+06	8.44384e+06	8.77701e+06	1.33885e+07	4.08881e+07	3.29122e+07	4.10375e+07	1.02448e+06	2.57409e+07	3.44957e+07	0	0	0	0	0	0	55689.1	2.24001e+06	9.50481e+06	7.15821e+06	8.57617e+06	9.7572e+06	4.92262e+07
324.290626519456/18.888	833377	1.08004e+06	3.0203e+06	2.44326e+06	1.54782e+06	709111	821468	927731	533628	473661	3.74004e+06	3.02664e+06	4.25729e+06	3.73692e+06	3.56665e+06	1.80852e+06	1.28103e+06	2.30173e+06	2.6149e+06	2.97825e+06	1.07975e+06	818121	877399	847169	618289	636337	698130	679822	548330	422072
132.077014452976/1.29191666666667	2.95017e+06	89773.2	172184	997825	1.06968e+06	1.23357e+06	1.25986e+06	2.16379e+06	681845	736554	1.49526e+06	990785	1.08092e+06	1.84726e+06	154318	639968	606733	80396.9	1.29808e+06	1.48667e+06	2.1738e+06	6.13588e+06	1.58548e+06	3.17052e+06	905645	607402	447123	89026.2	1.33261e+06	541237
451.326311984782/12.901	1.65792e+06	954242	458922	1.13906e+06	1.67019e+06	488013	830628	3.47982e+06	1.08104e+06	1.86121e+06	2.60273e+06	1.73447e+06	960452	4.44308e+06	1.46873e+06	1.32728e+06	2.01988e+06	3.69251e+06	2.47928e+06	3.56567e+06	866873	1.44504e+06	842902	783983	1.16924e+06	2.93773e+06	1.49278e+06	2.68508e+06	628904	601227
384.115953164759/5.18516666666667	1.15536e+06	2.1874e+06	956493	1.24835e+06	709301	1.84797e+06	1.05807e+06	586381	1.39562e+06	772161	421710	605751	899585	433275	843093	1.01425e+06	1.66606e+06	684448	833103	784686	2.40679e+06	2.09879e+06	2.50188e+06	2.93858e+06	5.22818e+06	2.12348e+06	2.55186e+06	2.23055e+06	3.62081e+06	4.51923e+06
640.347263495202/14.7956666666667	2.32317e+06	2.57381e+06	2.84371e+06	3.54808e+06	2.06053e+06	1.77895e+06	2.28037e+06	2.9547e+06	3.0899e+06	2.51441e+06	2.90065e+06	3.77314e+06	7.20453e+06	1.65618e+06	4.11004e+06	6.9152e+06	9.78806e+06	3.22616e+06	2.48145e+06	3.22826e+06	3.10007e+06	2.19194e+06	1.76014e+06	3.86394e+06	3.00701e+06	2.41014e+06	1.61831e+06	1.48116e+06	1.68968e+06	1.22202e+06
927.66403801352/8.267	2.18014e+06	2.3401e+06	2.23781e+06	2.30954e+06	2.30744e+06	2.05356e+06	2.2191e+06	2.3737e+06	2.08877e+06	2.47097e+06	2.08044e+06	1.98784e+06	1.73074e+06	2.09793e+06	1.91913e+06	1.97463e+06	1.77847e+06	2.02903e+06	1.8391e+06	2.25391e+06	2.38843e+06	2.17551e+06	2.2344e+06	2.43462e+06	2.08754e+06	2.5675e+06	2.26592e+06	2.51461e+06	2.30744e+06	2.11127e+06
548.37292191975/17.338	1.64753e+06	1.52968e+06	2.5827e+06	1.88136e+06	533618	1.11313e+06	948606	1.03256e+06	1.31136e+06	712836	871028	1.70344e+06	4.3574e+06	1.00158e+06	1.56709e+06	3.916e+06	7.6303e+06	1.59362e+06	1.79693e+06	1.58087e+06	3.24046e+06	1.78782e+06	1.16556e+06	2.27274e+06	2.04961e+06	1.11269e+06	846583	932523	1.33923e+06	1.01384e+06
183.084319614644/2.12666666666667	1.49751e+06	1.52193e+06	1.68572e+06	1.41655e+06	1.44778e+06	1.46175e+06	1.57604e+06	1.69909e+06	1.40955e+06	1.50931e+06	1.74897e+06	1.67261e+06	1.55367e+06	1.59163e+06	1.38126e+06	1.36333e+06	1.49526e+06	1.42332e+06	1.38542e+06	1.68547e+06	1.55241e+06	1.69246e+06	1.69903e+06	1.71604e+06	1.6721e+06	1.80518e+06	1.86045e+06	1.91103e+06	2.21535e+06	2.02148e+06
530.325787381865/16.9345	3.03324e+06	1.57493e+06	2.51539e+06	2.35586e+06	1.67445e+06	1.13559e+06	1.60822e+06	2.82949e+06	1.37083e+06	2.68921e+06	834639	1.06867e+06	1.83458e+06	1.14522e+06	1.02399e+06	1.24239e+06	1.18398e+06	1.31758e+06	1.04108e+06	1.50919e+06	1.9186e+06	1.66806e+06	1.32093e+06	1.31636e+06	1.5323e+06	1.28352e+06	995849	1.11551e+06	1.41744e+06	1.00397e+06
327.20228858469/6.33291666666667	141588	2.17191e+06	1.73517e+06	135401	1.35336e+06	145417	167049	2.38206e+06	128396	2.43594e+06	2.41795e+06	222052	154989	2.61389e+06	3.12644e+06	150963	113851	232647	2.19769e+06	377112	141022	1.61897e+06	124755	2.40279e+06	141545	4.74863e+06	173853	4.66562e+06	1.73708e+06	296126
498.290029607455/9.88475	2.69239e+06	3.30642e+06	1.94415e+06	2.67264e+06	6.07051e+06	4.03532e+06	2765545	3.17504e+06	3.27815e+06	1.9297e+06	490776	1.86455e+06	1.60355e+06	604231	1.71703e+06	1.31789e+06	982721	724227	1.0572e+06	209095	2.7884e+06	1.24167e+06	963811	205754	1.51152e+06	4.66332e+06	2.24031e+06	1.83741e+06	455699	1.27143e+06
298.129611852219/5.09858333333333	3.06681e+06	2.47097e+06	1.36359e+06	1.84942e+06	3.28467e+06	3.12665e+06	2.40137e+06	1.59053e+06	3.11195e+06	2.51819e+06	1.03793e+06	1.15458e+06	1.61794e+06	1.0313e+06	1.06592e+06	1.62475e+06	2.51968e+06	943368	1.24858e+06	1.19144e+06	3.02341e+06	3.06351e+06	2.57643e+06	3651882	3.32424e+06	3.05695e+06	2.28204e+06	2.6795e+06	2.60252e+06	1.69452e+06
230.248245236466/11.5873333333333	1.14048e+06	1.07263e+06	1.28447e+06	1.20208e+06	1.04719e+06	1.1364e+06	1.04947e+06	1.185e+06	1.14582e+06	1.23392e+06	1.7449e+06	1.88888e+06	2.09771e+06	2.02236e+06	2.22035e+06	1.77013e+06	1.79288e+06	1.75955e+06	2.18076e+06	1.72036e+06	1.26799e+06	856845	1.02749e+06	1.08252e+06	1.40502e+06	958541	1.23132e+06	935700	1.11252e+06	1.15147e+06
165.05457274138/1.57058333333333	6.28729e+06	6.1372e+06	7.05682e+06	5.7419e+06	5.99646e+06	5.64374e+06	5.29601e+06	6.58304e+06	4.94727e+06	6.67915e+06	2.88937e+06	7.49796e+06	5793883	7.99286e+06	4.34342e+06	7.18139e+06	6.90668e+06	4.55335e+06	3.76666e+06	6.41273e+06	4.13948e+06	4.05638e+06	5.59013e+06	4.39881e+06	3.98311e+06	3.90883e+06	4.30124e+06	5.0371e+06	4.46851e+06	2.91153e+06
781.556993222033/21.0213333333333	0	0	97618.5	1.71718e+06	6.25495e+06	3.5361e+06	3.85424e+06	1.22644e+07	2.16412e+06	2.95952e+06	3.22009e+06	1.67856e+06	5.23746e+06	6.08771e+06	1.91533e+06	4.52994e+06	3.43667e+06	0	16452.9	309118	0	0	57351.2	1.42222e+06	1.03723e+07	3.00176e+06	3.19599e+06	2.15596e+06	2.79442e+06	2.5906e+06
305.304035561494/14.2911666666667	1.90366e+06	2.16768e+06	1.38674e+06	1.48802e+06	1.77134e+06	2.26169e+06	2.1156e+06	4.21144e+06	1.86336e+06	3.1259e+06	1.76757e+06	1.11589e+06	1.70386e+06	910326	1.64509e+06	1.9374e+06	1.57791e+06	990365	1.00903e+06	1.29526e+06	837683	793119	1.03366e+06	953470	944688	1.1759e+06	1.38946e+06	1.99333e+06	1.06977e+06	1.58851e+06
313.274582787579/21.605	4.74314e+06	3.88625e+06	3.88493e+06	0	18737.7	0	947206	1.11611e+06	812049	985465	0	0	1.11788e+06	0	1.74844e+06	1.34677e+06	984103	3.95249e+06	3.69446e+06	0	4.53009e+06	4.47469e+06	3.51844e+06	0	0	955779	906515	920586	924790	968275
205.22654375615/5.766	2.30568e+06	1.9537e+06	2.22327e+06	1.6774e+06	1.79358e+06	1.92408e+06	1.6238e+06	2.18815e+06	1.68058e+06	2.38118e+06	1.8064e+06	2.45063e+06	1.25527e+06	2.43952e+06	1.81392e+06	2.42647e+06	2.17569e+06	2.26955e+06	1.23408e+06	1.50067e+06	1.84505e+06	1.75267e+06	2.10194e+06	1.517e+06	1.03818e+06	1.21497e+06	1.30094e+06	1.44031e+06	1.33902e+06	1.01852e+06
984.396795286444/7.41916666666667	0	3.56002e+06	3.17298e+06	6.47097e+06	4.06965e+06	4.69413e+06	2.56917e+06	564608	3.37102e+06	1.07954e+06	1.9233e+06	3.55773e+06	4.58062e+06	1.88141e+06	3.79079e+06	2.58343e+06	3.12849e+06	710132	3.76457e+06	3.47398e+06	0	1.29406e+06	4.20036e+06	2.5767e+06	2.67721e+06	0	0	2.40828e+06	2.74843e+06	1.71696e+06
760.578929900893/24.5024166666667	0	0	0	0	249911	193081	1.02709e+07	4.49447e+06	1.03043e+07	1.24008e+07	453534	2.98533e+06	3.91238e+06	253410	3.43227e+06	2.88838e+06	6.53223e+06	94983.5	11220.1	740971	0	0	0	0	180229	8.94815e+06	7.9007e+06	4.86825e+06	8.89091e+06	8.08541e+06
124.058546266585/1.88608333333333	1.13069e+06	1.15498e+06	1.20033e+06	1.41512e+06	1.38921e+06	1.33164e+06	1.18639e+06	947419	1.21776e+06	1.11526e+06	1.40918e+06	1.12917e+06	1.35633e+06	1.21002e+06	1.26413e+06	1.12818e+06	1.12367e+06	1.04849e+06	1.28878e+06	1.1695e+06	1.02569e+06	990811	1.17494e+06	1.25876e+06	1.29012e+06	1.13993e+06	1.03281e+06	1.11327e+06	974893	1.08673e+06
758.571518541575/18.371	0	0	0	106093	0	2.14647e+06	7.14562e+06	2.369e+06	5.75392e+06	8.10334e+06	4.99725e+06	1.28288e+07	1.09428e+07	1.13214e+07	425559	9.71209e+06	1.19107e+07	0	0	0	0	0	0	28742.3	667201	6.82131e+06	8.3591e+06	6.49201e+06	7.04547e+06	7.9578e+06
571.360736058813/15.86575	1.89434e+06	1.57394e+06	2.13139e+06	2.02817e+06	1.5449e+06	1.0578e+06	1.3093e+06	1.61263e+06	1.25206e+06	951677	1.14172e+06	1.12358e+06	3.21478e+06	1.12818e+06	1.54047e+06	1.75462e+06	3.01413e+06	1.54044e+06	1.45429e+06	2.0643e+06	1.82464e+06	1.25257e+06	940052	1.20446e+06	2.17467e+06	1.39474e+06	848965	739026	1.2623e+06	710962
318.235519064819/21.772	3.01224e+06	3.63361e+06	2.39234e+06	0	0	0	1.84557e+06	1.28147e+06	1.01855e+06	1.38243e+06	0	0	1.04454e+06	0	1.54622e+06	1.78879e+06	778645	2.75447e+06	1.78349e+06	0	4.43799e+06	3.15934e+06	2.7142e+06	0	0	1.80576e+06	1.73884e+06	2.03205e+06	1.14676e+06	845982
358.369212050997/16.4410833333333	894909	1.3e+06	979734	1.29094e+06	770132	1.27672e+06	79601.4	667080	0	0	1.47605e+06	2.43346e+06	1.08088e+06	2.13049e+06	2.13022e+06	1.54377e+06	2.41321e+06	1.94908e+06	3.07573e+06	2.11187e+06	128875	6726.43	877636	1.6171e+06	1.14304e+06	904123	808497	983182	480896	3.67241e+06
192.0654725053/4.69958333333333	1.12159e+06	1.24646e+06	1.70831e+06	1.70753e+06	1.63121e+06	1.27364e+06	1.43812e+06	918532	1.36424e+06	1.13856e+06	1.50161e+06	1.51205e+06	2.64319e+06	1.40066e+06	1.37002e+06	778721	1.04951e+06	915388	1.52685e+06	1.52486e+06	834569	936553	678621	1.32376e+06	1.23507e+06	1.3248e+06	1.38057e+06	977928	1.02905e+06	927498
309.133018385454/1.215	1.43691e+06	2.2033e+06	330140	903216	1.51714e+06	2.28887e+06	1.6918e+06	823865	1.82613e+06	1.578e+06	1.22083e+06	1.28707e+06	830965	922364	1.18619e+06	2.60819e+06	2.73693e+06	2.13997e+06	1.55672e+06	1.16694e+06	1.16708e+06	1.474e+06	1.13443e+06	361485	1.57933e+06	979394	1.36798e+06	1.1622e+06	934662	1.00819e+06
830.566079647446/24.4726666666667	33099.5	11305.1	2.59501e+06	99324.3	6.8859e+06	5.71624e+06	3.22778e+06	4.49323e+06	2.07618e+06	1.93526e+06	286718	205288	881804	8.96716e+06	2.80137e+06	3.04668e+06	626516	17634.4	88088.6	439632	0	0	3.16849e+06	135250	6.22394e+06	2842570	3.83145e+06	3.02648e+06	2.36782e+06	3.06602e+06
522.347939700721/15.3561666666667	1.73887e+06	1.71215e+06	2.34274e+06	2.0517e+06	1.34486e+06	1.45872e+06	1.44103e+06	1.51744e+06	1.68942e+06	810471	1.5263e+06	1.9222e+06	3.61285e+06	1.38799e+06	1.83938e+06	2.32273e+06	3.26149e+06	1.64336e+06	1.58394e+06	1.72166e+06	2.31267e+06	1.8391e+06	1.36019e+06	2.22201e+06	1.6996e+06	1.53839e+06	1.46014e+06	1.22803e+06	1.343e+06	1.20726e+06
570.347960298217/15.33975	1.66909e+06	1.66382e+06	1.1328e+06	1.30488e+06	2.02936e+06	1.65228e+06	1.60624e+06	1.5772e+06	1.15901e+06	1.64608e+06	1.99434e+06	1.44338e+06	1.09477e+06	1.75313e+06	1.68326e+06	1.70141e+06	1.27142e+06	1.80119e+06	1.45816e+06	1.85068e+06	1.12244e+06	1.61197e+06	1.39844e+06	1.02831e+06	1.49279e+06	1.75071e+06	1.19335e+06	1.86904e+06	1.78903e+06	1.20452e+06
387.181478637684/12.854	1.14384e+06	1.09259e+06	1.59945e+06	1.28579e+06	1.14577e+06	1.30372e+06	1.09386e+06	904585	1.1797e+06	1.57437e+06	1.26876e+06	1.52573e+06	1.89798e+06	1.0505e+06	1.37439e+06	1.43295e+06	1.20304e+06	1.38468e+06	1.13527e+06	1.21131e+06	1.15575e+06	1.0926e+06	1.13411e+06	1.16022e+06	1.57501e+06	1.2858e+06	959649	1.09224e+06	1.27252e+06	1.37096e+06
784.578887950411/21.64	0	0	0	17397.1	3.3228e+06	4.54595e+06	6.67817e+06	7.13425e+06	6.54375e+06	8.79581e+06	2.45092e+06	2.5498e+06	4.61424e+06	3.45142e+06	1.92892e+06	2.01228e+06	5.83433e+06	0	0	1.36397e+06	0	0	0	75866.7	5.52868e+06	7.43928e+06	6.01201e+06	8.27859e+06	6.8364e+06	5.24672e+06
965.649586283449/18.3843333333333	1.53354e+06	1.60828e+06	3.55027e+06	2.25748e+06	1.42818e+06	1.02114e+06	992041	2.81646e+06	894447	1.34178e+06	1.37848e+06	1.1901e+06	2.95907e+06	1.73872e+06	1.19429e+06	1.13956e+06	1.21385e+06	1.4663e+06	1.13838e+06	1.13283e+06	2.12863e+06	1.78925e+06	1.64168e+06	1.72893e+06	1.82424e+06	1.60238e+06	1.31128e+06	1.24496e+06	1.31782e+06	1.36681e+06
528.300674299964/15.2645833333333	1.40891e+06	1.52223e+06	1.4564e+06	1.7195e+06	1.62931e+06	1.41559e+06	1.48492e+06	1.20109e+06	1.22548e+06	1.1268e+06	1.87184e+06	1.60719e+06	1.64827e+06	1.57484e+06	1.63947e+06	1.50766e+06	1.30969e+06	1.50961e+06	1.40461e+06	1.75504e+06	1.40676e+06	1.49486e+06	1.38728e+06	1242765	1.72548e+06	1.51685e+06	1.25018e+06	1.54204e+06	1.69232e+06	1.45344e+06
781.556974063933/20.6220833333333	0	0	67529.6	1.87776e+06	2.75136e+06	3.64963e+06	2.85424e+06	7.81443e+06	2.36789e+06	4.18847e+06	2.59771e+07	2.13575e+06	2.78301e+06	5.61235e+06	189858	4.67275e+06	2.02859e+06	0	0	1.42622e+06	0	0	0	241448	5.05961e+06	3.56256e+06	2.86434e+06	2.81327e+06	4.39502e+06	2.95434e+06
974.014192564869/5.98333333333333	1.17493e+06	2.47199e+06	971074	1.64221e+06	1.3448e+06	2.43761e+06	1.51052e+06	2.27084e+06	1.64657e+06	396228	2.08542e+06	529986	1.58709e+06	462467	353085	374303	1.37064e+06	352921	1.60607e+06	774479	1.14355e+06	901962	1.0915e+06	1.24498e+06	823117	877998	1.15318e+06	1.1343e+06	1.15557e+06	1.04334e+06
470.145066552709/1.951	339707	2.44494e+06	155878	2.50888e+06	1.30744e+06	3.49518e+06	1.78416e+06	44823.1	3.33938e+06	712052	58976.4	490192	734226	5352.07	1.16265e+06	2.08168e+06	2.27948e+06	173102	1.125e+06	81694.4	2.39115e+06	732546	2.78858e+06	3.5549e+06	4.61885e+06	2.13192e+06	2.97773e+06	1.47259e+06	2.2435e+06	3.27774e+06
133.10528481085/2.21533333333333	6.19966e+06	5.6744e+06	6.38819e+06	5.32736e+06	6.02333e+06	807371	4.95314e+06	6.37834e+06	3.22772e+06	779509	801014	6.1179e+06	5.37579e+06	6.22768e+06	6.10983e+06	5.81196e+06	6.14393e+06	6.32172e+06	4.4588e+06	5.9955e+06	5.33845e+06	3.55438e+06	3.8913e+06	4.6517e+06	2.80501e+06	2.3854e+06	4.47073e+06	5.35925e+06	5.00113e+06	3.77964e+06
616.347512591232/15.4514166666667	2.74764e+06	1.78078e+06	2.8497e+06	1.94629e+06	4.56642e+06	1.44608e+06	1.72244e+06	1.68423e+07	2.04346e+06	5.66151e+06	3.47052e+06	2.28825e+06	4.49822e+06	5.88234e+06	3.04546e+06	4.139e+06	2.76697e+06	6.72988e+06	1.65324e+06	2.93135e+06	1.87738e+06	2.2847e+06	1.5904e+06	2.97711e+06	2.89076e+06	2.62057e+06	2.01649e+06	2.51003e+06	2.27664e+06	1.3706e+06
608.386079635754/7.5155	124616	1.75014e+06	1.38631e+06	69885.6	1.15717e+06	99325.1	111296	2.29608e+06	80922.4	2.33606e+06	2.14609e+06	162672	114696	2.38844e+06	2.70114e+06	95413.7	72954.1	192277	1.66859e+06	233455	114556	1.37397e+06	72874.2	2.14307e+06	103750	5125144	156981	3.97832e+06	1.64125e+06	270993
120.181017955055/4.7495	3.20172e+06	2.85833e+06	3.35475e+06	2.70159e+06	2.90968e+06	2.96036e+06	2.49938e+06	3.04777e+06	2.59097e+06	3.35517e+06	3.4543e+06	4.15366e+06	3.01682e+06	4.30667e+06	3.32489e+06	3.97174e+06	3.70887e+06	3.51712e+06	2.58796e+06	3.14692e+06	2.68771e+06	2.64467e+06	2.98765e+06	2.45356e+06	2.13663e+06	2.24301e+06	2.45457e+06	2.58328e+06	2.43251e+06	2.03281e+06
794.604017210966/8.101	862297	1.2256e+06	1.11516e+06	1.22481e+06	1.31939e+06	969242	1.01628e+06	1.21769e+06	895774	1.37197e+06	1.4468e+06	1.28402e+06	1.10503e+06	1.38066e+06	1.40916e+06	1.33922e+06	1.04739e+06	1.23646e+06	1.15572e+06	2.16291e+06	1.22767e+06	1.09562e+06	1.0603e+06	1.57517e+06	987022	1.99032e+06	1.23071e+06	1.64475e+06	1.24588e+06	991037
256.263649008448/20.838	1.68847e+06	1.46986e+06	2.24845e+06	2.30748e+06	61095.4	1.12241e+06	810342	1.22855e+06	779667	1.44804e+06	1.10317e+06	922525	3.20661e+06	767931	1.52891e+06	1.088e+06	922971	2.88201e+06	1.83683e+06	0	2498418	1.47627e+06	1.05e+06	76895.6	1.17558e+06	1.10418e+06	1.04495e+06	1.92353e+06	1.23558e+06	846423
805.556855516043/21.7098333333333	0	0	1.57667e+06	4.53173e+06	1.61625e+06	2.30895e+06	5.7492e+06	1.29143e+07	5.49153e+06	1.06938e+07	1.42468e+06	1.75731e+06	2.51184e+06	1.33477e+06	906466	3.6338e+06	6.3208e+06	0	417885	1.09494e+06	0	0	605993	502563	1.87127e+06	7.72577e+06	4.9653e+06	7.764e+06	5.19374e+06	4.48728e+06
433.315718706019/12.5328333333333	1.58517e+06	903440	834965	2.04312e+06	3.19723e+06	1.63082e+06	1.10709e+06	1.03281e+06	1.29956e+06	1.87644e+06	518626	1.33549e+06	688480	406950	1.13543e+06	1.11751e+06	1.13424e+06	542670	562211	351111	595635	1.5369e+06	1.13796e+06	1.16025e+06	1.69293e+06	5.05103e+06	1.98102e+06	4.40879e+06	1.11707e+06	1.1455e+06
781.556942680333/21.339	0	0	319712	387425	2.27212e+06	4.81387e+06	3.84354e+06	5.21181e+06	2.93302e+06	4.36382e+06	3.07649e+06	8.22325e+06	4.11736e+06	3.62139e+06	493753	7.39823e+06	6.38901e+06	0	71110.2	771966	0	0	1.3386e+06	268820	6.44652e+06	5.53245e+06	3.49466e+06	2.87202e+06	3.36585e+06	2.66487e+06
381.080720934478/1.23133333333333	1.67658e+06	1.95264e+06	90921.1	179467	353483	1.57678e+06	725985	188169	2.30793e+06	1.66539e+06	35957.6	63547.7	62877.5	12791.6	64813.7	1.07786e+06	1.83525e+06	149900	115547	75929.3	2.08056e+06	2.10829e+06	2.22849e+06	2.21052e+06	2.50412e+06	2.02238e+06	2.24905e+06	2.07021e+06	2.0445e+06	2.43051e+06
130.05013476519/2.02341666666667	1.89509e+06	1.91696e+06	2.12819e+06	1.87653e+06	2.38172e+06	1.73457e+06	1.89106e+06	2.20237e+06	1.78417e+06	1.7429e+06	1.93686e+06	1.52798e+06	2.45721e+06	971646	2.40765e+06	1.12947e+06	1.38274e+06	3.84669e+06	4.30896e+06	2.96783e+06	1.45909e+06	1.373e+06	1.2636e+06	1.35528e+06	1.30484e+06	1.6211e+06	1.67725e+06	336331	1.16338e+06	1.445e+06
70.0659896826102/1.249	961976	1.14574e+06	1.47082e+06	1.36118e+06	1.32367e+06	1.21905e+06	1.25491e+06	1.40888e+06	1.0906e+06	1.12976e+06	1.40513e+06	1.48518e+06	1.28579e+06	1.52233e+06	1.32384e+06	1.14203e+06	1.13673e+06	1.32247e+06	1.1879e+06	1.35717e+06	648751	706253	920265	790491	727035	648827	663458	742695	722199	684887
354.301197636824/21.1136666666667	3.48963e+06	1.90793e+06	4.1437e+06	1.14076e+06	494390	829867	745320	1.79425e+06	592650	2.63071e+06	491408	1.03888e+06	2.14318e+06	683025	1.19178e+06	928562	662958	2.03179e+06	1.02526e+06	41186.5	1.50915e+06	77524.7	840794	224678	604501	793695	393746	295433	452554	300302
570.35266449079/15.5776666666667	1.92801e+06	1.97619e+06	1.05257e+06	1.57019e+06	1.17895e+06	1.37153e+06	1.09024e+06	1.11621e+06	1.40019e+06	548829	303286	882057	1.51559e+06	726806	1.1175e+06	1.30618e+06	2.09662e+06	900686	1.0366e+06	1.31516e+06	2.30522e+06	1.37593e+06	1.26851e+06	1.41777e+06	2.73019e+06	1.68572e+06	1.15459e+06	1.12957e+06	1.53577e+06	1.1556e+06
482.518582556821/18.3843333333333	1.50899e+06	1.54204e+06	2.92349e+06	2.07091e+06	1.42622e+06	1.01832e+06	1.01366e+06	2.52691e+06	975020	1.20986e+06	1.1571e+06	1.05826e+06	2.49468e+06	1.52234e+06	1.05176e+06	864949	1.10126e+06	1.3471e+06	781683	1.05353e+06	1.9721e+06	1.57096e+06	1.51466e+06	1.55917e+06	1.60128e+06	1.49405e+06	1.16233e+06	1.10869e+06	1.14638e+06	1.38915e+06
725.558063086287/24.52225	0	33616.1	8.99944e+06	38626	2.97387e+06	3.49424e+06	2.29068e+06	3.63149e+06	1.9444e+06	2.03262e+06	0	100133	1.1838e+06	5.22518e+06	3.96205e+06	3.379e+06	1.14378e+06	0	21650.6	81872.9	0	4734.06	3.1651e+06	173913	256765	2.63454e+06	2.07026e+06	2.30381e+06	2.29003e+06	2.12699e+06
432.312409313316/11.5700833333333	737897	384852	352610	513765	1.20675e+06	402530	413790	643644	268054	1.55345e+06	2.45251e+06	1.37668e+06	725877	2.31426e+06	1.58614e+06	1.03879e+06	1.09944e+06	1.77763e+06	2.13774e+06	2.95043e+06	120853	1.21368e+06	814412	855811	806646	2.85589e+06	1.01496e+06	2.47786e+06	528663	241460
503.298166061482/15.0436666666667	1.23699e+06	1.57854e+06	2.00332e+06	2.14804e+06	1.10083e+06	1.47928e+06	1.52546e+06	1.04168e+06	1.66691e+06	1.15298e+06	538558	791976	1.13686e+06	560770	758677	743340	674650	419947	705004	725156	1.78856e+06	1.32203e+06	1.7653e+06	1.76653e+06	2.14921e+06	1.54186e+06	1.37661e+06	1.47342e+06	1.66183e+06	1.97835e+06
780.55332352016/24.505	0	157904	1.46544e+06	138200	2.28705e+06	716701	1.39963e+06	2.55481e+06	3.66852e+06	4.7655e+06	69389.8	1.0234e+06	1.46877e+07	2.52997e+06	3.11922e+06	4.21287e+06	1.69216e+07	0	2.13946e+06	334990	0	0	1.41325e+06	172784	1.60543e+06	2.4441e+06	1.16462e+06	1.13194e+06	3.0606e+06	1.01752e+06
973.512720310455/5.98333333333333	1.09259e+06	2.31023e+06	920991	1.52937e+06	1.26232e+06	2.27807e+06	1.43633e+06	2.14533e+06	1.54719e+06	389588	1.95493e+06	507809	1.49776e+06	441174	332908	358072	1.28752e+06	341767	1.49333e+06	732412	1.0748e+06	851246	1.02716e+06	1.16113e+06	779915	825319	1.07895e+06	1.05863e+06	1.08219e+06	978835
583.326078927161/24.6528333333333	3.26377e+06	3.25726e+06	1.21766e+06	1.0965e+06	3.52903e+06	2.89324e+06	2.92508e+06	2.05848e+06	3.53007e+06	3.47689e+06	5.60923e+06	3.43102e+06	4.08507e+06	5.38925e+06	4.65656e+06	3.16133e+06	3.60115e+06	1.27943e+06	5.28346e+06	4.42759e+06	152785	94690.2	1.49155e+06	4.12649e+06	4.11092e+06	1.79688e+06	2.19119e+06	2.24149e+06	1.82732e+06	2.54478e+06
270.23022252757/21.3893333333333	5.95934e+06	5.31e+06	3.97457e+06	172195	0	1.64456e+06	1.0015e+06	1.27664e+06	1.18576e+06	946037	0	78047	3.78197e+06	0	4.41907e+06	5.17323e+06	5.95382e+06	2.52991e+06	3.96469e+06	0	5.55741e+06	3.87148e+06	3.47514e+06	0	134627	1.46123e+06	911252	388332	585427	318005
480.279389573408/9.87666666666667	2.23769e+06	2.96228e+06	1.66149e+06	2.42016e+06	5.24072e+06	3.50842e+06	2.53266e+06	2.57601e+06	2.89677e+06	1.58979e+06	408668	1.58158e+06	1.35189e+06	507811	1.4802e+06	1.15134e+06	815363	603932	874735	172499	2.51641e+06	1.08176e+06	834714	201999	1.32005e+06	4.43357e+06	2.05329e+06	1.6605e+06	419133	1.17503e+06
572.363266425732/16.437	2.8997e+06	2.46901e+06	1.67229e+06	1.99224e+06	2.15266e+06	1.96352e+06	1.97622e+06	2.24664e+06	1.37445e+06	3.19345e+06	464092	407848	694507	539842	521703	744621	769199	855755	559773	742331	1.61611e+06	2.06813e+06	1.61533e+06	1.39946e+06	1.42715e+06	2.22e+06	1.14286e+06	2.05137e+06	1.74108e+06	1.03349e+06
960.61472392078/16.626	1.03774e+06	1.04706e+06	5.24446e+06	2.22567e+06	795126	577536	716689	2.92305e+06	1.17305e+06	1.44901e+06	523472	649200	4.1607e+06	864293	580766	733079	1.2558e+06	605919	762737	661314	1.59798e+06	763976	847887	1.78605e+06	974758	824349	584932	371619	391733	551347
503.306334602311/7.20266666666667	86911.9	1.73852e+06	1.1937e+06	55999.7	1.01752e+06	76518.6	89408.1	1.86751e+06	71821.5	1.88135e+06	1.9053e+06	121798	95842.6	2.04517e+06	2.43422e+06	73918.8	61974.4	141788	1.6437e+06	207351	82527.3	1.24824e+06	67312.4	1.96669e+06	82048.6	4.36842e+06	103308	4.03351e+06	1.38268e+06	213795
426.30200439152/12.5096666666667	1.47171e+06	1.11743e+06	1.56169e+06	773953	272525	276376	203770	955539	443279	1.16848e+06	1.26069e+06	839512	975028	1.18295e+06	461491	923007	749403	1.58694e+06	1.39834e+06	940919	1.27276e+06	8003.85	1.12211e+06	1.26515e+06	1.23151e+06	693312	1.31875e+06	2.85477e+06	967564	1.16349e+06
994.683625830698/16.104	1.51886e+06	1.52774e+06	2.57001e+06	2.04671e+06	1.58742e+06	1.26181e+06	1.29029e+06	1.86084e+06	1.29351e+06	1.26536e+06	1.11799e+06	656646	2.86592e+06	1.12345e+06	921565	884312	1.48264e+06	1.20224e+06	1.08221e+06	916037	1.70024e+06	1.39375e+06	1.48579e+06	1.52391e+06	1.77906e+06	1.52142e+06	1.27508e+06	1.36645e+06	1.45128e+06	1.53515e+06
449.310795086423/10.84575	1.77015e+06	894638	727150	1.46048e+06	2.90719e+06	1.33927e+06	998460	1.67283e+06	1.09273e+06	2.45339e+06	1.17794e+06	1.80668e+06	1.55053e+06	1.1026e+06	1.93653e+06	1.51457e+06	1.27606e+06	1.29959e+06	1.91759e+06	1.09773e+06	907030	1.31808e+06	950156	927879	1.33916e+06	3.11015e+06	1.49149e+06	2.32761e+06	745931	663180
415.212780328689/14.3169166666667	1.54761e+06	1.19239e+06	1.31998e+06	412905	370822	1.45746e+06	359305	1.43263e+06	458935	633515	594869	1.81893e+06	377203	1.56255e+06	1.74896e+06	1.38703e+06	530213	1.8461e+06	2.21368e+06	674021	1.43197e+06	1.65245e+06	1.74722e+06	1.73069e+06	1.78887e+06	1.60397e+06	1.30606e+06	1.42368e+06	1.56908e+06	1.73918e+06
357.279805181005/15.1518333333333	1.08712e+06	552494	283904	339422	46830.3	283563	787341	932201	559481	575135	3.99044e+06	1.67362e+06	1.13343e+06	3.09781e+06	1.3449e+06	708266	1.52247e+06	3.83504e+06	3.86533e+06	2.27196e+06	669496	1.00112e+06	675394	1.10052e+06	585572	1.14844e+06	1.16182e+06	1.67448e+06	474252	649943
319.304701399517/11.6239166666667	935950	990110	1.0003e+06	1.01265e+06	939851	1.0368e+06	976448	1.04065e+06	992501	999314	1.24778e+06	1.40063e+06	1.36743e+06	1.36372e+06	1.39685e+06	1.35952e+06	1.39807e+06	1.17646e+06	1.42014e+06	1.32509e+06	974316	808073	927977	858004	1.07876e+06	824936	941787	861004	901543	966525
783.572419773307/21.1083333333333	0	0	0	185568	1.87419e+07	5.84439e+06	2.06054e+06	756571	7.63469e+06	2.42878e+06	884191	995981	548052	987554	1.04488e+06	533461	591624	0	0	459851	0	0	0	300411	1.39472e+07	2.47409e+06	1.4807e+06	8.71025e+06	5.41404e+06	2.42635e+06
123.156246227089/1.88608333333333	815665	889986	886782	1.01781e+06	1.04994e+06	984422	847673	650827	920425	816596	961438	822529	974501	824195	888160	751888	524255	623845	862313	806078	743700	663049	842871	884691	529438	784585	481747	452743	645383	746253
120.045026526945/7.72033333333333	327597	537537	1.53492e+06	1.46743e+06	1.12298e+06	717036	758917	445601	602486	352134	1.04632e+06	3.41918e+06	4.70549e+06	828356	2.90051e+06	1.09507e+06	1.22841e+06	642933	2.39525e+06	1.50723e+06	335310	271034	384424	616129	711913	730755	683967	475261	515735	483868
330.337623158277/14.8275	995366	1.24226e+06	1.00832e+06	1.15978e+06	703798	915360	742765	603674	264821	457413	1.06861e+06	1.41692e+06	888793	1.42074e+06	1.22215e+06	987584	1.43866e+06	1.39682e+06	1.80544e+06	1.3227e+06	2.27522e+06	367934	858898	1.54525e+06	1.14485e+06	844266	813053	862928	539999	2.63323e+06
807.574173627785/20.6388333333333	0	0	0	7.57013e+06	2.66268e+06	3.20161e+06	712165	2.52455e+06	1.01318e+06	2.12315e+06	1.67977e+07	1.49608e+06	2.62004e+06	1.54222e+06	2.78038e+06	2.14795e+06	1.12993e+06	0	0	5.75939e+07	0	0	0	7.08704e+06	4.20858e+06	1.76771e+06	1.17807e+06	1.21237e+06	1.25456e+06	1.06308e+06
817.583580634522/12.363	778108	170806	20392	144415	401848	2.40317e+06	367919	26795	155720	452404	323489	6.9451e+06	824379	171289	1.2916e+06	510506	345750	386691	2.32603e+06	118353	168524	245751	302278	324635	733625	4.32166e+06	587044	1.31564e+06	49821.6	249279
484.331835940729/18.388	1.73312e+06	1.7464e+06	3.04453e+06	2.2141e+06	1.628e+06	1.30925e+06	1.29774e+06	2.55149e+06	1.23731e+06	1.56908e+06	1.53982e+06	1.40938e+06	2.59236e+06	1.77736e+06	1.39437e+06	1.35067e+06	1.41556e+06	1.57529e+06	1.32533e+06	1.37761e+06	2.10202e+06	1.84724e+06	1.77098e+06	1.80237e+06	1.88445e+06	1.73193e+06	1.51148e+06	1.45856e+06	1.52768e+06	1.59026e+06
526.49729610277/15.2845833333333	748086	242795	765223	905801	637742	575802	542187	469465	499441	436520	1.4752e+06	1.13308e+06	1.13727e+06	1.15356e+06	1.16054e+06	1.0732e+06	948318	1.10509e+06	1.01066e+06	1.39111e+06	993793	1.08375e+06	988175	531825	1.34423e+06	1.07366e+06	719379	1.11183e+06	1.21698e+06	1.05131e+06
566.325710200017/14.5623333333333	1.19569e+06	1.45938e+06	1.09556e+06	1.30387e+06	1.49305e+06	1.13648e+06	999346	792815	708784	753766	985385	633648	1.75752e+06	684569	881514	1.35988e+06	1.87833e+06	838113	678684	1.12545e+06	1.12205e+06	1.4929e+06	797606	940104	1.57343e+06	1.44124e+06	622400	1.14029e+06	1.36078e+06	613224
281.248014273401/21.6224166666667	3.82864e+06	2.39972e+06	3.69068e+06	0	504716	67879.3	1.24496e+06	1.80914e+06	917260	1.42373e+06	0	421832	2.79489e+06	70996.8	2.45683e+06	1.99941e+06	1.59182e+06	5.31608e+06	2.03991e+06	0	2.67129e+06	3.22316e+06	1.9247e+06	0	449012	1.25557e+06	984891	1.15522e+06	1.14332e+06	799640
373.274884509817/12.3678333333333	1.4702e+06	497072	207522	492132	888669	2.34481e+06	769205	201205	468206	939809	734974	4.57011e+06	1.22906e+06	547303	2.45552e+06	947625	758048	767320	2.33429e+06	422680	179003	971389	658562	675486	1.45877e+06	3.8712e+06	998477	1.77839e+06	264090	570419
344.135078107051/2.49916666666667	2.85959e+06	9.63533e+06	1.56158e+06	4.49545e+06	7.34236e+06	7.0917e+06	3.48507e+06	3.04131e+06	4.87872e+06	3.93033e+06	4.07783e+06	3.35655e+06	2.99333e+06	4.64992e+06	3.68679e+06	5.76955e+06	1.07605e+07	4.75175e+06	5.41395e+06	3.6102e+06	1.66743e+06	7.09569e+06	1.87832e+06	2.1695e+06	2.73165e+06	2.2392e+06	1.91692e+06	1.22381e+06	716693	1.12427e+06
131.049377332717/4.74966666666667	2.83201e+06	2.59176e+06	2.98689e+06	2.42947e+06	2.58516e+06	2.63111e+06	2.2826e+06	2.76719e+06	2.31172e+06	3.00377e+06	3.10101e+06	3.66694e+06	2.72008e+06	3.84177e+06	2.99177e+06	3.57708e+06	3.29945e+06	3.22908e+06	2.35852e+06	2.93284e+06	2.40963e+06	2.40636e+06	2.6378e+06	2.16261e+06	1.93797e+06	2.0631e+06	2.22359e+06	2.29922e+06	2.20098e+06	1.84902e+06
341.263343213157/7.90333333333333	798389	1.0659e+06	952411	955136	1.10117e+06	760061	839136	1.03874e+06	706884	1.10935e+06	1.04311e+06	879148	791648	953313	1.05122e+06	909613	687319	841887	903447	1.54629e+06	1.12492e+06	1.02366e+06	902981	1.46028e+06	891662	1.86303e+06	1.12984e+06	1.46236e+06	1.19567e+06	958808
588.411459061229/7.63283333333333	1.03135e+06	1.4461e+06	1.29902e+06	1.00603e+06	1.48182e+06	979370	998175	1.44692e+06	942100	1.54175e+06	1.26683e+06	972055	831231	1.21575e+06	1.18327e+06	949779	771983	1.00236e+06	1.08635e+06	1.37333e+06	1.09741e+06	1.28218e+06	1.01704e+06	1.53202e+06	1.00638e+06	1.59758e+06	1.10816e+06	1.63598e+06	1.42441e+06	1.14238e+06
760.583697537464/20.269	0	0	0	0	114585	2.05652e+06	6.58431e+06	1.54747e+06	1.82515e+07	6.38685e+06	4.12447e+06	4.28965e+06	3.01671e+06	3.24243e+06	3.28525e+06	2.90615e+06	4.24951e+06	0	0	0	0	0	0	0	5.1524e+06	5.0439e+06	5.15822e+06	8.33479e+06	5.04476e+06	5.09832e+06
614.163316846704/2.13966666666667	482927	2.47499e+06	1.07056e+06	2.36808e+06	3.06764e+06	1.33609e+06	2.10316e+06	898031	1.92354e+06	3.39114e+06	1.04991e+06	2.03093e+06	3.043e+06	250574	2.56281e+06	2.6812e+06	2.85597e+06	116109	3.66604e+06	686275	2.88606e+06	3.38673e+06	3.28615e+06	2.86858e+06	2.88191e+06	3.06495e+06	3.47284e+06	3.3772e+06	2.8997e+06	400476
681.519997157214/7.90933333333333	760231	1.09692e+06	971405	999257	1.16973e+06	842570	854448	1.09418e+06	768744	1.20488e+06	1.21444e+06	1.06587e+06	941431	1.17307e+06	1.22172e+06	1.11438e+06	878849	1.01675e+06	970870	1.69338e+06	1.03722e+06	966031	910912	1.38116e+06	862354	1.7367e+06	1.04588e+06	1.43414e+06	1.12152e+06	887531
613.160721855614/1.29916666666667	1.29803e+06	2.29541e+06	2.28948e+06	3.21426e+06	2.12002e+06	2.3887e+06	2.57593e+06	819432	2.12215e+06	1.73545e+06	715155	1.60751e+06	2.86967e+06	149522	2.59664e+06	1.40321e+06	1.71117e+06	802669	3.09426e+06	459050	945082	1.53703e+06	1.61538e+06	1.1697e+06	1.37773e+06	918505	1.02545e+06	1.39048e+06	1.32172e+06	913072
759.574546889243/22.1281666666667	0	0	0	0	1.27643e+07	1.70812e+06	2.72819e+06	9.19162e+06	2.41603e+06	6.2935e+06	2.00046e+06	4.07704e+06	5.89169e+06	2.61494e+06	223639	4.83844e+06	5.63697e+06	0	0	1.17662e+06	0	0	0	0	1.09195e+07	5.94683e+06	4.00276e+06	2.44798e+06	4.77386e+06	3.31646e+06
528.31019727599/16.0703333333333	1.63065e+06	2.13043e+06	456242	1.57585e+06	1.12053e+06	1.92705e+06	1.65631e+06	591753	1.38361e+06	1.82282e+06	220263	349088	151244	284090	305404	315112	252878	330280	321368	455316	1.60438e+06	1.51195e+06	1.71632e+06	1.18297e+06	1.20946e+06	1.45687e+06	1.16316e+06	1.73334e+06	1.40057e+06	1.42799e+06
759.574105993196/24.5785	0	0	37371.2	0	945788	735018	779960	2.09545e+06	3.9214e+06	5.87369e+06	1.83608e+06	9.34692e+06	1.50081e+07	1.03988e+06	6.85719e+06	6.96743e+06	1.44986e+07	0	0	463018	0	0	36029.2	0	476952	1.79057e+06	635482	898486	3.87079e+06	684912
213.12328850975/2.009	2.56562e+06	3.3001e+06	1.33872e+06	1.12594e+06	1.28029e+06	1.79659e+06	1.01073e+06	1.47962e+06	1.10953e+06	2.21637e+06	1.87989e+06	1.27276e+06	879113	2.22805e+06	809729	2.01301e+06	1.52e+06	2.46549e+06	1.01277e+06	2.90119e+06	1.79657e+06	2.11142e+06	1.49823e+06	876600	857096	1.16733e+06	1.0889e+06	1.76562e+06	1.23803e+06	686751
479.2978168238/14.9516666666667	851513	1.2407e+06	1.44474e+06	1.88636e+06	449694	963063	490274	445972	1.19167e+06	152541	494716	962485	2.23569e+06	295460	925778	1.12181e+06	1.99638e+06	363355	680526	585694	2.43336e+06	924360	1.25036e+06	2.0093e+06	1.65467e+06	983977	877890	801934	941724	1.13503e+06
511.360437945313/17.0038333333333	1.34635e+06	1.52318e+06	3.16673e+06	2.49571e+06	1.12567e+06	1.19213e+06	1.41608e+06	1.35867e+06	1.85546e+06	1.49777e+06	349962	412806	2.59731e+06	422852	414693	514953	1.29425e+06	763750	504105	261814	1.89993e+06	1.20038e+06	1.82808e+06	2.10608e+06	2.53788e+06	1.48797e+06	989149	1.05455e+06	1.51672e+06	1.62696e+06
221.121333888002/5.19941666666667	1.06019e+06	1.17031e+06	1.31037e+06	1.30399e+06	1.55637e+06	1.18897e+06	1.11611e+06	1.06601e+06	1.13276e+06	1.19393e+06	1.3256e+06	1.54852e+06	1.8161e+06	1.55745e+06	1.6271e+06	1.3253e+06	1.28352e+06	1.11831e+06	1.37353e+06	1.43287e+06	1.04952e+06	944622	1.29921e+06	1.20346e+06	1.34988e+06	1.39543e+06	1.13009e+06	1.0695e+06	1.13385e+06	1.0098e+06
496.341344022241/19.6433333333333	1.02022e+06	1.50719e+06	5.29209e+06	2.11322e+06	1.13217e+06	660885	875941	1.10127e+06	800317	470733	861022	1.94047e+06	6.90877e+06	1.13402e+06	1.7207e+06	1.62084e+06	1.79888e+06	726616	1.38167e+06	34060.3	1.49765e+06	1.24289e+06	1.33205e+06	1.3618e+06	1.5271e+06	1.37852e+06	825879	561591	827455	750042
283.175498667363/6.033	114609	1.60861e+06	1.30016e+06	143358	1.01635e+06	128961	163417	1.7124e+06	136834	1.78261e+06	1.71431e+06	208223	132968	1.86074e+06	2.27501e+06	156005	116347	257742	1.59858e+06	346990	144238	1.17837e+06	116277	1.79035e+06	137064	3.26887e+06	174002	3.20606e+06	1.30533e+06	253864
229.154747660892/5.66416666666667	3.36053e+06	9.49847e+06	1.90765e+06	3.58887e+06	3.69592e+06	5.70777e+06	1.8375e+06	2.41367e+06	4.01318e+06	4.67183e+06	2.18295e+06	3.80355e+06	1.66604e+06	2.8473e+06	1.33707e+06	2.9777e+06	3.34914e+06	2.27332e+06	1.42239e+06	4.46757e+06	2.98694e+06	2.91983e+06	2.13541e+06	1.11605e+06	1.20749e+06	2.97396e+06	2.83046e+06	2.95693e+06	3.11319e+06	1.0386e+06
547.360301798294/16.16875	1.90774e+06	1.6367e+06	1.37042e+06	1.53722e+06	573854	1.39213e+06	1.21858e+06	631793	1.72032e+06	990462	306643	708539	383440	187745	545313	1.56084e+06	1.89531e+06	388616	498492	559966	2.27441e+06	1.84094e+06	1.16268e+06	2433580	2.14393e+06	1.35473e+06	971580	1.07118e+06	1.37964e+06	855948
409.188399768592/5.766	1.53617e+06	1.27053e+06	1.72699e+06	1.13253e+06	1.22644e+06	1.33591e+06	1.05786e+06	1.4753e+06	1.0699e+06	1.56131e+06	1.21761e+06	1.83031e+06	852729	1.79552e+06	1.34981e+06	1.7993e+06	1.48885e+06	1.54914e+06	829093	1.05756e+06	1.33754e+06	1.19764e+06	1.57089e+06	1.05427e+06	759473	796920	924295	994721	926632	775248
782.565703271182/20.6225833333333	0	0	19801.3	266133	2.66567e+06	1.45757e+06	2.92797e+06	2.00009e+06	3.64808e+06	4.76141e+06	8.92225e+06	1.22733e+06	1.12213e+06	2.08299e+06	856743	1.85756e+06	1.32905e+06	0	0	1.96596e+06	0	0	0	441279	1.90536e+06	4.90011e+06	3.17999e+06	4.88946e+06	5.69584e+06	2.93583e+06
829.555352238728/24.4728333333333	0	0	1.29692e+06	258322	3.93123e+06	205741	2.792e+06	3.03719e+06	1.83791e+06	1.52551e+06	233522	220542	1.16987e+06	58402.5	6.68615e+06	5.22132e+06	1.03332e+06	0	175559	280002	0	0	1.55943e+06	109381	4.33428e+06	3.84477e+06	3.00165e+06	3.0571e+06	2.36626e+06	2.60354e+06
567.432657162222/7.63283333333333	658747	1.17646e+06	1.00279e+06	671945	1.16911e+06	619287	644533	1.22659e+06	579001	1.29036e+06	1.29473e+06	821731	723924	1.28254e+06	1.35812e+06	785824	575062	752861	993701	1.25724e+06	840206	1.03204e+06	661794	1.42884e+06	701128	1.9887e+06	873163	1.67248e+06	1.21659e+06	812241
295.158488711076/3.27416666666667	3.8345e+06	3.65872e+06	952795	1.27236e+06	3.17493e+06	3.44308e+06	2.60837e+06	2.20622e+06	5.54258e+06	3.85639e+06	2.0413e+06	1.97352e+06	1.95974e+06	1.38582e+06	1.83176e+06	3932462	4.71199e+06	2.86275e+06	2.23867e+06	1.66903e+06	5.1681e+06	5.46287e+06	4.51381e+06	5.42563e+06	5.56546e+06	5.36902e+06	4.39919e+06	3.63502e+06	4.56455e+06	3.08482e+06
446.327141001391/20.3418333333333	2.24935e+06	1.45375e+06	2.92598e+06	106986	141269	637000	670515	1.40056e+06	583123	1.64557e+06	1.60937e+06	1.53068e+06	2.20433e+06	69251.6	1.49213e+06	1.03696e+06	693779	2.71879e+06	1.33359e+06	1.31465e+06	857109	977586	637384	0	102175	349927	240768	262671	240097	149481
444.312212649329/18.9768333333333	672545	536825	868378	697688	1.20959e+06	365647	411868	589894	229241	409539	2.08583e+06	2.9316e+06	2.57933e+06	3.08609e+06	2.87823e+06	2.0595e+06	1.12045e+06	2.55789e+06	1.89646e+06	2.06258e+06	280611	297923	279800	229482	110673	149763	150433	155888	159046	90361.3
522.34772208021/15.026	1.25875e+06	1.61337e+06	1.20789e+06	1.4603e+06	874949	1.28391e+06	1.06462e+06	623167	1.33449e+06	385911	572233	796530	1.68783e+06	442154	833643	1.45731e+06	2.58031e+06	568513	669966	749152	2.31875e+06	1.71102e+06	1.18744e+06	1.88376e+06	1820054	1.41462e+06	1.15113e+06	1.14335e+06	1.24209e+06	994599
926.548494283255/7.41666666666667	0	2.92001e+06	2.37575e+06	4.54729e+06	2.81808e+06	3.32734e+06	1.82006e+06	961657	2.47111e+06	490010	1.37519e+06	2.09024e+06	3.33578e+06	1.33555e+06	2.72214e+06	1.88094e+06	2.01866e+06	473248	2.3371e+06	2.23331e+06	0	699060	3.21214e+06	1.97161e+06	1.95453e+06	0	0	1.65306e+06	2.0341e+06	1.23852e+06
188.194485667101/5.766	1.60339e+06	1.18993e+06	1.38937e+06	1.14029e+06	1.24068e+06	1.33969e+06	1.03435e+06	1.51697e+06	1.09359e+06	1.6998e+06	1.36573e+06	1.83426e+06	934007	1.86011e+06	1.35391e+06	1.84479e+06	1.64284e+06	1.65118e+06	786742	1.12262e+06	1.27181e+06	1.14717e+06	1.39491e+06	992889	750695	894874	871439	1.07825e+06	1.00544e+06	754125
307.585338341179/2.12116666666667	126743	1.3014e+06	842219	468724	316183	408431	1.49423e+06	659206	935742	131983	624781	625815	2.32373e+06	0	964501	295607	978314	0	3.10235e+06	681593	1.99579e+06	3.05343e+06	2.31307e+06	3.15111e+06	4.37018e+06	3.79993e+06	3.77993e+06	3.18293e+06	2.87767e+06	3.33825e+06
219.026885333139/1.178	853414	1.06681e+06	351787	833718	831913	1.18456e+06	923935	591474	1.2833e+06	776929	461405	512231	525129	290037	531940	658792	928593	514223	779039	475910	1.25853e+06	1.18455e+06	1.18955e+06	1.2648e+06	1.69089e+06	1.20245e+06	1.25634e+06	1.16276e+06	1.09978e+06	1.48311e+06
414.30522457603/22.0034166666667	3.83506e+06	2.56885e+06	5.18618e+06	0	0	58210.7	698455	1.49286e+06	621646	2.35583e+06	0	129831	95766.8	0	2.30441e+06	928983	532621	3.35528e+06	2.07618e+06	0	1.46332e+06	1.57268e+06	1.00944e+06	0	0	289960	194917	205049	189211	112081
784.578828401613/22.0923333333333	0	0	0	923703	4.47336e+06	1.61645e+06	3.62542e+06	6.81752e+06	3.49078e+06	4.78661e+06	972358	1.55458e+06	3.19434e+06	1.72049e+06	7.36628e+06	2.23765e+06	2.81606e+06	0	0	1.83062e+06	0	0	0	970669	3.5033e+06	4.01906e+06	3.95849e+06	3.51608e+06	4.6163e+06	3.96304e+06
309.166671020628/1.0685	975328	1.07514e+06	540113	857223	1.25972e+06	1.20032e+06	798579	936893	839577	1.20192e+06	1.64446e+06	1.97241e+06	1.09443e+06	1.75945e+06	1.82156e+06	2.70701e+06	1.95422e+06	1.83728e+06	1.31324e+06	1.42022e+06	455195	530825	717481	575119	520022	480386	522529	605576	614726	354809
185.153472550268/14.22925	1.21261e+06	971988	1.94758e+06	703078	1.9969e+06	2.14432e+06	1.3042e+06	1.15509e+06	1.49879e+06	2.13962e+06	440107	721726	1.05558e+06	887472	1.37264e+06	801315	301247	2.39092e+06	852983	2.4579e+06	818023	709634	844440	689506	1.07944e+06	868911	754584	642982	818207	862237
300.446249956665/13.736	1.65322e+06	1.73097e+06	1.45992e+06	1.88732e+06	1.39058e+06	1.45784e+06	1.7806e+06	1.17153e+06	1.29256e+06	1.227e+06	1.02208e+06	1.11632e+06	899329	1.11203e+06	860118	1.41539e+06	953946	623422	949373	1.06785e+06	1.5476e+06	1.72584e+06	1.15444e+06	1.49576e+06	1.27157e+06	1.3625e+06	1.47042e+06	1.85053e+06	1.55276e+06	1.2074e+06
783.574275634901/22.812	0	0	0	1.4583e+06	1.79509e+07	1.29866e+06	1.51191e+07	3.68138e+06	3.65111e+06	2.44783e+06	2.01342e+06	2.26358e+06	2.33675e+06	644684	6.51212e+06	5.34634e+06	1.19715e+06	0	0	1.28291e+06	0	0	0	3.12402e+06	1.97371e+06	4.63105e+06	4.47146e+06	2.73492e+06	3.2384e+06	2.08333e+06
415.304947316821/12.535	1.18639e+06	688321	637049	1.51081e+06	2.39281e+06	1.22501e+06	805912	790349	986966	1.4328e+06	395492	1.03997e+06	519926	320186	886389	846728	875698	411704	435189	270357	438603	1.13898e+06	860236	874496	1.28779e+06	3.75337e+06	1.51518e+06	3.1968e+06	854756	895229
806.570699012223/23.0633333333333	0	0	1.15472e+06	1.50232e+06	2.36306e+06	765237	796378	4.90683e+06	639456	5.47566e+06	2.88287e+06	1.848e+06	3.44669e+06	489621	7.78366e+06	7.12152e+06	3.34096e+06	0	96549.3	5.61723e+06	0	0	1.13858e+06	557969	8.08788e+06	1.19592e+07	4.59976e+06	5.38237e+06	4.10024e+06	1.1175e+07
262.129110505719/1.297	1.10355e+06	1.18824e+06	387750	664851	1.14962e+06	1.31676e+06	1.07626e+06	902176	1.55954e+06	1.39845e+06	885360	1.07166e+06	828984	773599	976623	1.8008e+06	1.81402e+06	1.22908e+06	1.08443e+06	861657	976055	1.23569e+06	1.22694e+06	1.4062e+06	1.47537e+06	1.28242e+06	1.19964e+06	1.43169e+06	1.23869e+06	875574
424.343681183048/15.08	594278	351339	473372	545175	1.00628e+06	549721	686766	844864	442044	253743	1.53455e+06	2.32639e+06	982228	1.86035e+06	2.45763e+06	1.37967e+06	704444	2.22043e+06	1.66662e+06	1.78339e+06	359381	718679	184473	383827	264043	297443	479757	535475	464978	284862
351.230385772782/20.988	3.57676e+06	2.72484e+06	2.97668e+06	0	0	191171	159969	438356	107468	189291	0	9792.72	399441	0	510792	245798	155623	4.9684e+06	1.63886e+06	0	3.54819e+06	3.50811e+06	2.02455e+06	41260.1	210839	155683	141176	87412.8	156641	120945
828.552298491356/20.6220833333333	0	0	33792.4	8.60049e+06	2.83326e+06	1.10064e+06	355085	905440	364569	445890	9.20007e+06	849989	688852	926229	1.15413e+06	1.10234e+06	429653	0	76123.6	1.4113e+07	0	0	0	9.12764e+06	3.00306e+06	731712	520695	367667	494570	457155
641.350688012043/14.6435	1.77079e+06	1.13343e+06	899776	1.66498e+06	1.04406e+06	857553	995232	946470	1.30107e+06	509027	932560	1.83133e+06	3.04066e+06	531380	1.85214e+06	2.89714e+06	3.95014e+06	1.02376e+06	1.08901e+06	1.37018e+06	1.30097e+06	914148	863817	1.91777e+06	1.29922e+06	1.18687e+06	773519	686084	883110	601392
203.150068090367/1.247	812400	841512	771740	690752	865601	861966	715035	1.81992e+06	647467	984576	1.35989e+06	131124	504220	1.29278e+06	178300	457693	450632	1.20074e+06	666895	915977	565638	678650	600754	493442	576212	548882	510385	869546	570784	551972
524.363428860311/16.3525833333333	1.63748e+06	1.89392e+06	1.518e+06	1.66026e+06	926625	1.62321e+06	1.32914e+06	985520	1.86924e+06	961470	227420	262833	857673	181685	315243	566166	1.21769e+06	298300	284029	338376	2.71816e+06	1.8845e+06	1.48435e+06	2.04199e+06	2.13544e+06	1.81267e+06	1.3356e+06	1.44031e+06	1.47294e+06	1.39026e+06
314.269654611856/19.9818333333333	1.04197e+06	959506	1.1714e+06	1.20311e+06	1.78721e+06	715153	536960	853935	475374	973251	1.18332e+06	2.11726e+06	1.82666e+06	1.30784e+06	2.64459e+06	1.29555e+06	934672	1.55345e+06	2.02171e+06	1.27429e+06	493079	507977	613958	288455	251748	344168	328707	338443	339393	241309
783.572523467733/24.4548333333333	0	0	0	6.88108e+06	2.01548e+06	2.07896e+06	3.52458e+06	2.00952e+06	2.52221e+06	2.91806e+06	1.74686e+06	566675	378011	1.73956e+06	824353	616508	785887	39661.6	18835.7	2.8805e+06	0	0	0	7.15318e+06	1.45828e+06	3.01566e+06	3.20455e+06	2.9872e+06	2.93248e+06	2.77169e+06
613.160040036618/2.49733333333333	3.48052e+06	4.90007e+06	1.70716e+06	8.36238e+06	4.29826e+06	4.0238e+06	3.96086e+06	112296	7.54009e+06	4.06709e+06	665377	295672	3.65685e+06	171116	1.82949e+06	800537	3.49629e+06	4.13865e+06	7.14597e+06	183920	808244	621475	601607	587283	1.40155e+06	1.531e+06	285863	195658	236404	109675
545.344460452567/15.638	1.64339e+06	2.57753e+06	2.08664e+06	2.30002e+06	1.39743e+06	1.84867e+06	1.47348e+06	1.25439e+06	1.37316e+06	1.29272e+06	420378	253726	1.76991e+06	329235	895996	2.10754e+06	1.89643e+06	566128	592743	487747	2.05025e+06	1.89843e+06	1.32021e+06	1.90356e+06	2.75654e+06	2.23353e+06	1.15938e+06	1.41047e+06	1.73861e+06	1.15261e+06
781.556660548103/21.656	0	0	453945	223365	2.44873e+06	1.53081e+06	3.07643e+06	8.64004e+06	2.24824e+06	7.07543e+06	1.7773e+06	1.38082e+06	5.75896e+06	1.20223e+06	815065	5.45441e+06	4.13667e+06	0	396535	1.46608e+06	0	0	1.04174e+06	178963	1.86657e+06	6598669	3.12902e+06	2.32789e+06	2.85079e+06	2.25152e+06
388.288968764323/21.5221666666667	2.39854e+06	2.10377e+06	3.05923e+06	0	0	0	539518	785829	380545	1.04547e+06	0	0	2.22637e+06	0	3.85104e+06	2.07594e+06	1.02152e+06	3.65983e+06	3.42603e+06	0	1.03834e+06	968438	898001	0	0	213114	156460	153507	145336	95764.7
569.344795997501/15.4945	1.57844e+06	8.04716e+06	1.14962e+06	1.34858e+06	1.92905e+06	1.57387e+06	1.40422e+06	1.18516e+06	974542	1.07753e+06	1.45925e+06	1.17814e+06	1.93838e+06	1.37667e+06	1.56155e+06	1.98343e+06	2.90828e+06	1.56994e+06	2.24773e+06	1.84144e+06	1.21535e+06	1.77732e+06	1.27145e+06	1.09611e+06	1.75091e+06	1.66998e+06	956549	1.37433e+06	1.6853e+06	945259
344.134952960796/2.19866666666667	1.63774e+06	1.42154e+06	1.11882e+06	868913	1.35526e+06	1.26067e+06	1.3933e+06	1.01929e+07	1.09443e+06	2.16177e+06	1.3078e+07	9.37696e+06	1.30404e+06	2.48528e+06	1.35661e+06	2.98773e+06	3.32018e+06	3.10624e+06	1.82713e+06	1.00456e+07	725598	1.20917e+06	989205	1.52395e+06	1.91999e+06	1.5491e+06	1.49891e+06	2.54907e+06	3.13846e+06	1.93772e+06
417.246374544839/5.366	1.29901e+06	1.19191e+06	1.00603e+06	757458	579415	1.28995e+06	1.35386e+06	2.37073e+06	813455	823347	1.11753e+06	122580	75933.3	845606	55293.7	479725	419821	631526	694082	499421	1.28441e+06	1.19394e+06	666898	590749	872922	690381	807145	1.33715e+06	969264	1.16424e+06
570.285165600872/15.6183333333333	786381	539370	814976	917690	1.44439e+06	877847	632562	1.56804e+06	749609	719999	2.15255e+06	1.70955e+06	627190	1.3887e+06	1.60973e+06	1.03633e+06	0	1.61633e+06	1.80345e+06	2.56513e+06	0	1.35665e+06	693510	342630	557052	777291	585613	1.36491e+06	918009	941451
338.269848292962/19.03	453748	442147	715523	680004	1.16971e+06	376653	322206	519661	228158	352619	1.6807e+06	2.68749e+06	2.74569e+06	2.08174e+06	2.96151e+06	1.70176e+06	969832	1.92946e+06	2.01731e+06	1.72341e+06	219560	226035	279850	239794	156121	171809	186490	182801	190024	135108
994.529803887593/7.401	0	1.8719e+06	920083	2591957	2.47424e+06	2.64741e+06	1.42999e+06	748506	1.96942e+06	315994	1.21242e+06	2.66401e+06	2.33756e+06	1.05374e+06	2.99169e+06	2.75009e+06	2.61651e+06	401017	3.10005e+06	1.94259e+06	0	503975	1.63281e+06	1.17429e+06	1.25853e+06	0	0	1.16346e+06	1.03618e+06	579333
805.556192315912/22.1715	0	0	274955	2.12094e+06	1.04435e+06	4.52518e+06	2.02711e+06	2.26976e+06	1.87972e+06	1.80455e+06	1.48829e+06	1.05344e+07	1.43382e+06	3.64469e+06	2.38069e+06	1.76251e+06	1.15686e+06	0	326182	705254	0	0	229192	3.47272e+06	5.23807e+06	1.70928e+06	1.54812e+06	1.63471e+06	1.46027e+06	1.22615e+06
815.582936971761/8.117	1.46335e+06	1.5716e+06	1.52356e+06	1.55074e+06	1.65905e+06	1.46981e+06	1.53974e+06	1.57607e+06	1.43536e+06	1.65074e+06	1.36239e+06	1.2806e+06	1.19696e+06	1.37047e+06	1.29331e+06	1.32334e+06	1.22081e+06	1.32673e+06	1.2535e+06	1.53118e+06	1.58546e+06	1.50128e+06	1.53122e+06	1.64695e+06	1.43484e+06	1.73117e+06	1.54342e+06	1.7409e+06	1.56725e+06	1.42899e+06
626.388893304275/6.93266666666667	450751	430636	309821	454810	610239	731859	1.04978e+06	723781	1.22373e+06	1.58735e+06	1.6064e+06	2.54991e+06	809440	1.84607e+06	945970	2.40873e+06	2.91782e+06	1.15607e+06	683524	1.49748e+06	256322	166306	261835	135923	178181	228661	258603	265905	211775	224935
490.193650495914/4.98275	3.42367e+06	1.54222e+06	0	10233.8	208948	969164	276229	76108.8	2.34971e+06	3.76147e+06	0	17929.6	0	0	0	3.13166e+06	4.4506e+06	161299	25766	0	3.84879e+06	4.04019e+06	3.28127e+06	3.91734e+06	3.18857e+06	4.97278e+06	3.65833e+06	3.63334e+06	3.48288e+06	2.08264e+06
153.040632914884/4.63366666666667	1.12577e+06	1.06552e+06	789339	1.45821e+06	1.24725e+06	995366	1.0571e+06	1.06954e+06	1.16981e+06	883359	1.33852e+06	906962	798817	1.07502e+06	1.32643e+06	1.03473e+06	646039	1.37023e+06	1.80553e+06	1.57174e+06	1.26528e+06	1.29777e+06	1.3153e+06	1.23883e+06	1.08611e+06	1.10756e+06	1.37229e+06	1.28123e+06	1.00633e+06	1.42422e+06
421.652121472857/7.95216666666667	585087	720340	774633	685805	893470	533877	528262	552839	579449	915922	838360	824792	652595	739422	908505	630185	492832	559279	698479	1.62521e+06	916405	825727	806833	1.21382e+06	640253	1.67494e+06	828039	859799	943541	689267
643.365916098825/15.9083333333333	2.00494e+06	1.63151e+06	2.03971e+06	1.85534e+06	1.52507e+06	1.18932e+06	1.45919e+06	2.96313e+06	2.26563e+06	2.65607e+06	845492	1.10519e+06	3.54482e+06	835668	1.15301e+06	2.15942e+06	3.21218e+06	1.32229e+06	1.04028e+06	1.20946e+06	1.46049e+06	1.07586e+06	1.02887e+06	2.41076e+06	1.62977e+06	1.7555e+06	1.04802e+06	792497	882495	684293
151.061235011019/1.84883333333333	1.02214e+06	915087	1.23863e+06	978758	1.04405e+06	962153	923627	1.13677e+06	840368	1.08875e+06	1.11511e+06	1.22842e+06	956613	1.29731e+06	1.02865e+06	1.00815e+06	925460	1.35103e+06	951619	1.06054e+06	719701	750083	775082	633296	541766	594969	592709	677059	600989	519513
780.552956242367/22.1423333333333	0	0	1.34551e+06	10622.5	1.73796e+06	4.18502e+06	1.33822e+06	2.45973e+06	1.68891e+06	1.47185e+06	2.06483e+06	1.74821e+06	3.7116e+06	4.44378e+06	650032	2.5944e+06	3.02035e+06	0	355795	755592	0	0	922063	28726.5	1.20949e+06	1.49996e+06	960874	1.63292e+06	1.169e+06	1.36107e+06
477.310432150722/7.01716666666667	88943.1	1.47974e+06	1.13139e+06	72400.8	1.06208e+06	94597.7	110514	1.62551e+06	83048.3	1.64903e+06	1.55262e+06	162322	108422	1.72458e+06	2.0706e+06	91607.1	72285.1	146614	1.40131e+06	206698	79670.1	1.04025e+06	67861.6	1.55329e+06	85736.3	2.65878e+06	106703	2.53084e+06	1.21663e+06	218326
117.074269788396/1.24916666666667	667726	779148	1.01642e+06	938232	917965	818473	861664	965475	732963	761450	962868	992857	862695	1.02466e+06	882725	777049	754261	916142	807073	914759	459121	484507	639558	551802	491999	439125	444779	500477	474486	468206
225.123562085858/7.07516666666667	597564	856307	767115	915748	876276	677993	623731	491565	675547	474764	268371	933353	957830	336663	438376	725978	460287	340177	909900	482546	395028	1.03693e+06	1.29956e+06	636174	1.02246e+06	868854	984507	1.00872e+06	1.35408e+06	1.09508e+06
953.608617763555/10.8445	1.57228e+06	904142	721899	1.44531e+06	2.35087e+06	1.15471e+06	1.17927e+06	1.42618e+06	1.08596e+06	2.16064e+06	921491	1.23602e+06	1.08367e+06	1.02342e+06	1.27423e+06	1.03788e+06	895439	1.03495e+06	1.36798e+06	922987	1.01585e+06	1.33566e+06	1.05296e+06	946734	1.295e+06	2.08772e+06	1.43446e+06	1.91508e+06	758753	698094
482.325592118253/18.1063333333333	937518	1.17836e+06	3.53043e+06	2.04907e+06	772771	891110	829134	2.22788e+06	883701	1.1922e+06	959027	1.06629e+06	3.74385e+06	1.44419e+06	756183	664247	1.49999e+06	1.00093e+06	902302	882150	1.36578e+06	1.26213e+06	1.20509e+06	1.31208e+06	1.62138e+06	1.02264e+06	861564	725243	932959	1.10113e+06
156.076481035713/1.107	828465	1.06959e+06	1.24527e+06	1.20881e+06	1.35696e+06	1.09113e+06	1.12618e+06	1.41671e+06	651039	886138	1.16119e+06	1.67692e+06	947837	2.16152e+06	1.2386e+06	1.38626e+06	943725	920689	879755	1.0561e+06	783478	671896	879876	682126	588054	915991	734226	748184	661447	570648
452.278497995877/14.557	602214	882415	3.09874e+06	1.72919e+06	555667	524431	591046	1.24191e+06	1.0188e+06	724646	337381	265150	2.75834e+06	285861	263365	373790	718234	491172	344827	344347	1.5391e+06	587403	766255	1.16903e+06	1.30923e+06	714009	515892	423841	599471	914024
806.569131548371/21.339	0	0	77618.9	6.26358e+06	1.38811e+06	2.4779e+06	1.74011e+06	3.34945e+06	1.59209e+06	2.3809e+06	887775	2.53175e+06	2.86958e+06	1.56643e+06	6.73056e+06	3.34157e+06	2.35348e+06	0	0	1.24802e+06	0	0	60964.7	3.2068e+06	3.87505e+06	2.0572e+06	1.88969e+06	1.89433e+06	1.55037e+06	1.42896e+06
308.086099496701/2.1335	272033	986101	182586	2.04047e+06	860974	1.32981e+06	1.00813e+06	357036	1.77353e+06	375059	416669	700801	1.45724e+06	0	601721	794694	1.36069e+06	134117	1.86531e+06	394820	2.78509e+06	1.89806e+06	2.90655e+06	3.67304e+06	5.03979e+06	3.46327e+06	3.99541e+06	2.08738e+06	2.72426e+06	4.04667e+06
760.580734735335/22.1603333333333	0	0	0	0	3.19194e+06	424563	4.60237e+06	2.1747e+06	3.99311e+06	6.92592e+06	513939	1.12369e+06	1.61179e+06	651293	3.69064e+06	3.33357e+06	6.18412e+06	0	0	307461	0	0	0	0	2.76623e+06	5.23101e+06	4.00824e+06	4.21099e+06	3.39271e+06	2.57083e+06
518.32550693275/14.2423333333333	1.33777e+06	1.3536e+06	649833	571816	1.60535e+06	872086	738809	651721	429434	803695	276201	500670	2.23449e+06	219731	172657	1.02509e+06	1.706e+06	106890	348009	540312	915113	691961	1.02177e+06	896472	1.23672e+06	2.44774e+06	659839	881431	780442	367483
781.556933347915/20.2903333333333	0	0	0	263289	540124	1.45973e+06	1.51745e+06	2.52053e+06	972936	1.55275e+06	6.30823e+06	2.76987e+06	4.80481e+06	5.58092e+06	210743	3.33434e+06	2.57867e+06	0	0	349100	0	0	0	173278	1.87897e+06	1.44649e+06	1.50319e+06	1.45373e+06	1.45787e+06	1.34387e+06
521.344769270187/15.6608333333333	1.40621e+06	1.40755e+06	1.98081e+06	1811938	715827	939193	914703	908755	1.34523e+06	646151	372357	694538	1.76325e+06	1.09926e+06	779323	1.28596e+06	2.55917e+06	556697	650731	495110	2.06032e+06	1.25119e+06	831959	1.53634e+06	1.77947e+06	1.23926e+06	862090	770002	1.04518e+06	660737
283.283043551684/13.73575	1.57455e+06	1.74356e+06	1.39749e+06	1.85826e+06	1.42654e+06	1.55213e+06	1.70897e+06	1.28945e+06	1.30972e+06	1.32387e+06	1.15242e+06	1.17886e+06	1.06582e+06	1.17622e+06	968319	1.38897e+06	1.12872e+06	718936	1.04845e+06	1.10744e+06	1.69097e+06	1.62103e+06	1.44417e+06	1.40774e+06	1.378e+06	1.39599e+06	1.45501e+06	1.77266e+06	1.52847e+06	1.31875e+06
433.315647293862/12.9176666666667	915263	538363	259727	631100	939345	289807	405668	1.82805e+06	370091	1.02208e+06	1.42441e+06	957890	542889	2.31195e+06	812159	747963	1.10447e+06	1.931e+06	1.35281e+06	1.90146e+06	479054	822005	470203	435893	666752	1.65486e+06	840731	1.53032e+06	351786	359608
539.391758483006/19.7610833333333	1.01475e+06	1.50034e+06	2.24219e+06	1.46556e+06	955354	719865	712670	404869	809611	437496	528003	1.20409e+06	4.73297e+06	478214	1.29851e+06	1.45832e+06	1.88999e+06	487452	1.62499e+06	507242	1.13181e+06	911017	1.07313e+06	1.43515e+06	1.51458e+06	1.59032e+06	797044	592346	714552	736791
146.060320090572/5.76675	1.40133e+06	1.1666e+06	1.35458e+06	989443	1.12291e+06	1.21586e+06	986271	1.29304e+06	1.06036e+06	1.52856e+06	1.35253e+06	1.73193e+06	964483	1.81474e+06	1.33529e+06	1.7728e+06	1.58416e+06	1.50144e+06	895971	1.20836e+06	1.1479e+06	1.13791e+06	1.32977e+06	983567	819102	886868	999772	1.09112e+06	1.01562e+06	837938
928.666469777533/8.268	1.19374e+06	1.31435e+06	1.23871e+06	1.27111e+06	1.27176e+06	1.15007e+06	1.23022e+06	1.31287e+06	1.1275e+06	1.37206e+06	1.13177e+06	1.08991e+06	942405	1.15139e+06	1.05947e+06	1.06712e+06	976065	1.11214e+06	1.00216e+06	1.23053e+06	1.3084e+06	1.19603e+06	1.22599e+06	1.31945e+06	1.14024e+06	1.40333e+06	1.23986e+06	1.39511e+06	1.27146e+06	1.15937e+06
300.201482886087/6.034	149480	1.42989e+06	1.16135e+06	152404	955552	158153	173655	1.5584e+06	35782.3	1.56367e+06	1.38169e+06	212194	144362	1.54345e+06	1.96257e+06	37393.6	129066	251155	1.37786e+06	320449	170186	50173.2	126709	1.57509e+06	132341	2.58021e+06	166690	2.49283e+06	1.13235e+06	241079
312.112040212457/1.35466666666667	1.56488e+06	1.7246e+06	310472	680217	1.1554e+06	1.79842e+06	1.09379e+06	807713	2.40498e+06	1.53984e+06	711493	806049	714322	536230	811737	1.76737e+06	2.2094e+06	1.25526e+06	1.00156e+06	705970	1.99278e+06	2.16133e+06	2.09125e+06	2.49081e+06	2.59493e+06	2.21662e+06	2.15397e+06	2.36212e+06	1.94104e+06	1.51611e+06
756.555818255889/21.0023333333333	0	0	0	5.25924e+06	2.7754e+06	839017	1.74485e+06	1.62788e+06	2.55801e+06	3.67117e+06	2.59013e+06	6.01617e+06	2.56446e+06	81326.9	5.41141e+06	2.91254e+06	3.29069e+06	0	0	3.28956e+06	0	0	0	2.28704e+06	2.10639e+06	981666	1.30962e+06	1.00344e+06	668096	706546
476.317380131413/21.0056666666667	632536	783607	958158	632987	1.45894e+06	0	280775	363475	118502	287880	8380.3	2.30409e+06	938816	1.86997e+06	2.88499e+06	1.37219e+06	564583	2.01611e+06	2.80474e+06	0	337287	293630	594389	0	92337.8	109945	135729	101093	140393	91882.5
420.312093002391/19.83325	1.04597e+06	835082	959393	931407	1.39592e+06	534417	526806	712985	406897	904192	1.05625e+06	1.82058e+06	1.28019e+06	1.53732e+06	2.01928e+06	1.18882e+06	850436	1.4598e+06	1.58953e+06	1.22075e+06	451552	477597	436478	276518	147027	224416	182285	197682	189555	118020
510.888120928252/8.3985	529787	811392	745292	803170	693492	491663	639963	813292	505757	820394	844588	788434	542746	773712	852215	699682	494864	736410	610787	1.36282e+06	922424	674792	701160	1.06816e+06	572610	1.2792e+06	755594	1.03928e+06	817434	643857
204.123110175283/7.6005	983900	1.09168e+06	528625	845106	564227	1.3355e+06	461392	769868	785922	1.37063e+06	634599	1.01968e+06	525082	554979	666887	1.25006e+06	1.44797e+06	557497	523790	336486	833601	798344	831321	628898	926361	550820	656673	688984	774993	504077
550.388236308198/18.9820833333333	1.23057e+06	1.34767e+06	3.14606e+06	1.69874e+06	652297	925542	830540	1.36331e+06	1.03899e+06	1.14274e+06	422432	482555	2.76099e+06	357444	584353	920176	2.02547e+06	691755	856252	516997	1.66986e+06	1.13313e+06	759870	1.39628e+06	1.43278e+06	891877	644997	783995	956675	875129
309.094776912707/1.89391666666667	186016	1.13741e+06	347096	1.76544e+06	655352	1.34382e+06	1.03332e+06	45271.6	1.36887e+06	338502	51150	260333	615164	18533.6	584465	450258	581385	86084.7	106408	56408	1.47983e+06	445247	1.40885e+06	1.50871e+06	1.75789e+06	1.05167e+06	1.53757e+06	711374	1.17343e+06	1.76476e+06
546.347567454787/15.1075833333333	1.03309e+06	1.51138e+06	938867	1.15117e+06	696912	1.30248e+06	1.04276e+06	498916	1.14284e+06	680540	312604	351703	793100	248536	370435	496365	1.17918e+06	252507	351734	369075	1.3555e+06	901393	1.1283e+06	1.39691e+06	1.91676e+06	1.4514e+06	1.0246e+06	1.16484e+06	1.24978e+06	1.03715e+06
992.946234691243/16.1168333333333	845913	682825	1.44896e+06	1.22196e+06	720884	614780	742303	1.03451e+06	745671	628728	640993	0	1.72197e+06	641890	431719	319071	835791	679892	508140	322022	951935	796355	835618	863488	982476	969202	599601	650395	820011	852672
436.288964011255/20.5236666666667	1.02945e+06	1.01732e+06	1.88079e+06	1.06146e+06	1.75642e+06	574539	577280	603637	349656	706957	0	2.1082e+06	90894.4	2.20637e+06	2.15468e+06	1.16951e+06	669140	1.45121e+06	1.30856e+06	0	81943.1	413292	595974	284247	4192.34	246493	213389	226523	195377	129802
463.347278593911/13.0553333333333	1.93861e+06	1.85502e+06	482514	1.23491e+06	1.73572e+06	1.94604e+06	2.08629e+06	1.27553e+06	1.97551e+06	1.80933e+06	966321	1.2388e+06	772157	789875	1.17935e+06	2.23803e+06	2.25711e+06	938825	1.02443e+06	1.20156e+06	1.46018e+06	1.11192e+06	1.62299e+06	1.78012e+06	1.66186e+06	1.72077e+06	1.67438e+06	1.90196e+06	1.59934e+06	1.15182e+06
115.086965675192/1.06516666666667	885532	839427	1.06746e+06	878476	853897	859615	795900	847775	758372	931203	915676	901676	819571	1.06011e+06	847250	854287	856522	895109	688271	807326	804319	767849	916461	713913	664849	667196	720185	720886	743726	611011
807.573778833628/20.9896666666667	0	0	0	1.36844e+07	1.43282e+06	1.37724e+06	558783	1.9065e+06	546037	658067	846848	577969	989848	1.81589e+06	4.51521e+06	901051	754014	0	0	1.30429e+06	0	0	0	1.56957e+07	1.92724e+06	928314	803836	538631	524648	521321
481.313387757812/16.8615833333333	995874	1.27261e+06	5.48908e+06	2.51309e+06	1.08979e+06	785591	902842	2.64275e+06	1.16447e+06	60791.7	240415	389670	1.52368e+06	438331	298064	269967	439423	666003	276528	308919	1.53315e+06	998432	1.0188e+06	1.52432e+06	1.58969e+06	1.23885e+06	996531	725400	840353	1.01766e+06
805.556864245198/21.3698333333333	0	0	553301	1.04684e+06	2.25824e+06	4.08751e+06	3.65124e+06	4.07987e+06	3.46531e+06	2.85072e+06	139780	1.99856e+06	1.6388e+06	1.43434e+06	107338	180585	1.27248e+06	0	57146.5	867024	0	0	224884	973312	5.74901e+06	1.8534e+06	3.28248e+06	4.07861e+06	3.68132e+06	3.26789e+06
640.347468436093/14.3163333333333	1.03419e+06	1.64448e+06	527587	1.66671e+06	915943	1.34158e+06	1.16069e+06	590964	1.92067e+06	353487	552368	1.26167e+06	2.30684e+06	284255	1.34628e+06	2.8429e+06	5.27379e+06	595000	722777	922536	2.79386e+06	1.15082e+06	1.31013e+06	2.90452e+06	2.357e+06	1.63183e+06	960244	998399	1.16018e+06	857617
285.083387585691/4.63383333333333	1.0784e+06	1.0757e+06	866658	1.69249e+06	1.39552e+06	1.12171e+06	1.25221e+06	1.04239e+06	1.33603e+06	837017	1.1803e+06	984720	749440	911902	1.13818e+06	1.06716e+06	489063	1.26612e+06	1.95667e+06	1.44198e+06	1.21641e+06	1.17974e+06	1.22098e+06	1.29414e+06	983496	1.17046e+06	1.25231e+06	1.23043e+06	933318	1.37078e+06
288.144802904017/4.583	973091	1.11782e+06	408657	709265	863104	709046	645144	728289	753204	523219	114005	506406	303083	162779	820625	522284	493829	117820	196592	206879	1.23209e+06	1.64176e+06	1.50922e+06	1.4168e+06	915192	1.18574e+06	1.4397e+06	1.20866e+06	1.16373e+06	993630
832.586369580527/21.014	11792.7	0	439015	226039	3.40588e+06	898201	662443	1.1174e+06	1.50553e+06	3.49515e+06	1.08969e+07	1.76844e+06	2.09552e+06	5.7589e+06	5.35885e+06	3.68303e+06	2.52828e+06	0	213227	3.78318e+06	0	0	264301	298534	2.17285e+06	1.1922e+06	812679	1.26841e+06	1.37023e+06	614372
784.583287417106/21.1055833333333	0	0	0	132504	5.16846e+06	3.74158e+06	1.02297e+06	6.45043e+06	3.16206e+06	6.08894e+06	558099	2.55838e+06	891707	1.89961e+06	1.56515e+06	191435	1.52794e+06	0	0	137266	0	0	0	15526	3.14461e+06	3.10742e+06	1.40593e+06	3.62472e+06	2.55964e+06	1.4325e+06
433.284073599811/6.817	79988.8	1.36479e+06	1.04226e+06	75216.9	991118	92321.4	102359	1.53061e+06	79957	1.54697e+06	1.44815e+06	142972	106463	1.43565e+06	1.94139e+06	86798.5	70624.7	140527	1.31896e+06	203195	82224.6	1.00345e+06	67839	1.46886e+06	86811.2	2.42916e+06	108965	2.34497e+06	1.15047e+06	212303
494.32538053837/14.3280833333333	709257	1.23099e+06	1.0256e+06	1.19568e+06	461273	837851	659667	378753	1.30027e+06	421410	120887	90785.8	974737	67967.3	124542	237825	769271	190333	144067	123340	2.7899e+06	995375	897940	1.43053e+06	2.45061e+06	1.17214e+06	675964	833135	1.18626e+06	1.12946e+06
368.15434655591/5.633	1.5501e+06	1.28596e+06	771722	964432	1.66815e+06	1.43999e+06	1.25849e+06	1.54523e+06	1.24564e+06	1.88549e+06	1.58164e+06	2.15246e+06	1.0683e+06	1.67723e+06	1.81985e+06	3.38758e+06	2.62704e+06	2.46669e+06	1.31424e+06	1.51004e+06	810143	1.03154e+06	1.14566e+06	1.03487e+06	927136	872674	759029	1.04903e+06	907892	534003
546.354851101974/18.505	3.18401e+06	3.10248e+06	1.81218e+06	2.38063e+06	2.22728e+06	2.16831e+06	1.82115e+06	1.67328e+06	1.82566e+06	2.07241e+06	1.47363e+06	1.43479e+06	1.72373e+06	1.29801e+06	1.64519e+06	1.6577e+06	1.71877e+06	2.20041e+06	2.08979e+06	1.40668e+06	3.2301e+06	3.12881e+06	2.68441e+06	2.46518e+06	2.23973e+06	2.12864e+06	2.01686e+06	2.1505e+06	1.9834e+06	2.20806e+06
340.285557809132/20.552	1.76083e+06	1.11526e+06	2.25287e+06	224802	42537.4	114706	606926	1.48199e+06	526028	1.64051e+06	976332	961006	1.54957e+06	985450	1.2071e+06	714855	499584	1.20192e+06	1.0469e+06	878007	675220	784356	653110	510780	314419	528045	372307	365905	348892	242310
521.336380586053/7.201	69485.6	1.29413e+06	969354	58773.8	920886	74331.2	84799.7	1.48086e+06	69912.1	1.48619e+06	1.42825e+06	133807	92267.9	1.46153e+06	1.89808e+06	74971.4	59146.6	116682	1.25225e+06	178015	65542.2	989246	57497.6	1.45215e+06	71836.5	2.55999e+06	94373.3	2.39546e+06	1.0742e+06	191221
691.365604888462/15.694	2.18446e+06	2.06094e+06	873771	3.6089e+06	1.9187e+06	1.70806e+06	2.28658e+06	2.96664e+06	1.60927e+06	3.92637e+06	346842	710299	199539	271502	536330	809151	1.13357e+06	707480	328615	746887	839094	1.30627e+06	1.20555e+06	1.18613e+06	2.83024e+06	4.63511e+06	959553	1.4753e+06	3.18955e+06	1.80214e+06
371.295708211168/18.805	1.08578e+06	578535	181870	229362	288428	312823	134684	1.1736e+06	234563	662719	3.22568e+06	1.08263e+06	905375	2.29834e+06	1.12155e+06	574686	1.13123e+06	3.88151e+06	2.65364e+06	1.86718e+06	37891.1	646435	144154	448707	225890	310170	41431.6	268685	29725.4	40428.2
344.262585980047/20.625	2.43786e+06	1.26396e+06	1.54675e+07	24186.4	9778.18	633524	516832	4.14893e+06	456102	1.88202e+06	0	1.09341e+06	1.13295e+06	11833.8	934819	750064	465379	1.23361e+06	582072	0	1.29524e+06	1.734e+06	805780	15229	204186	351566	416568	372661	672624	270289
702.498672701444/7.917	1.19757e+06	1.34966e+06	1.28143e+06	1.31183e+06	1.37241e+06	1.22527e+06	1.2444e+06	1.32609e+06	1.1788e+06	1.40071e+06	1.12321e+06	1.05773e+06	1.0025e+06	1.11533e+06	1.0767e+06	1.10506e+06	983214	1.07567e+06	1.04184e+06	1.29976e+06	1.32389e+06	1.29003e+06	1.27209e+06	1.43747e+06	1.20614e+06	1.45231e+06	1.27638e+06	1.46961e+06	1.33064e+06	1.24612e+06
547.360580487798/15.8289166666667	950037	1.42267e+06	889984	1.22944e+06	351108	1.41562e+06	827364	260069	1.501e+06	463953	63214.1	138393	272511	35910.1	138701	417339	1.1898e+06	81878.1	186772	122922	2.33666e+06	1.25547e+06	1.07084e+06	1.98274e+06	2.08355e+06	1.02142e+06	727316	903179	882455	878830
414.302083515814/12.9034166666667	810048	497752	280830	590972	873943	282162	373007	1.66945e+06	359504	939930	1.31577e+06	944046	531128	2.21937e+06	615428	708251	1.06874e+06	1.74628e+06	1.24838e+06	1.77504e+06	201009	745646	343089	393014	615648	1.61584e+06	795290	1.4847e+06	335489	343216
258.110535419384/1.1835	1.02077e+06	823485	593001	762596	482047	931820	719074	588818	947151	936610	1.21326e+06	829978	643104	1.14808e+06	691412	1.49629e+06	962933	820376	545979	852983	690135	1.00716e+06	724792	516791	279567	326657	541864	460145	342816	316199
437.237138248846/6.82358333333333	167053	1.54621e+06	1.23798e+06	111136	1.02282e+06	161951	182259	1.54343e+06	140163	1.6008e+06	1.26594e+06	178232	125820	1.31173e+06	1.27891e+06	116066	99506	234387	1.13554e+06	290618	143472	1.22198e+06	112880	1.52932e+06	127759	2.66959e+06	160877	2.57038e+06	1.2745e+06	282807
808.58308404413/20.639	0	0	0	2.13963e+06	3.01937e+06	1.67353e+06	1.66957e+06	2.23638e+06	1.46102e+06	4.57152e+06	2.10866e+06	1.94919e+06	940602	1.14445e+06	1.45272e+06	629489	618456	0	0	9.56279e+06	0	0	0	2.01084e+06	2.64973e+06	1.65816e+06	1.05134e+06	1.2548e+06	2.25221e+06	1.60486e+06
498.347445802712/15.6981666666667	899519	989584	1.75263e+06	1.34947e+06	998258	782261	840306	1.24994e+06	890366	879431	668923	434614	1.94194e+06	695719	568297	591647	996680	765286	695035	568695	1.069e+06	888491	1.00945e+06	1.04383e+06	1.12132e+06	1.03224e+06	770442	889569	912390	988250
276.144557490006/2.73183333333333	2.90296e+06	2.67848e+06	842527	1.26869e+06	2.2317e+06	2.96385e+06	2.24072e+06	1.93962e+06	4.21476e+06	3.28598e+06	2.11926e+06	2.13809e+06	1.93118e+06	1.48069e+06	1.976e+06	3.38489e+06	4.10149e+06	3.20178e+06	2.46843e+06	1.80352e+06	3.62024e+06	4.27503e+06	3.98897e+06	4.464e+06	5.5386e+06	4.5551e+06	4.32716e+06	2.18656e+06	4.62961e+06	3.59022e+06
301.293703151596/19.905	860698	977475	1.71887e+06	1.68627e+06	1.06131e+06	741143	897892	644563	734046	717729	873023	1.02558e+06	1.15066e+06	984862	1.1453e+06	697098	650842	775650	925031	823474	845823	584405	750371	844446	720955	595892	533043	494058	617171	489165
828.552845152487/20.342	0	0	0	2.16179e+06	3.36856e+06	849356	306260	961004	220828	339451	1.28411e+06	1.62478e+06	2.40076e+06	1.0843e+06	1.73786e+06	1.42442e+06	2.80155e+06	0	43233.7	7.66395e+06	0	0	0	7.67852e+06	1.34427e+06	764865	561270	245150	310576	301634
294.101429174181/1.90483333333333	1.29605e+06	1.22566e+06	304497	582862	1.02156e+06	1.31002e+06	931659	758788	1.78627e+06	1.33509e+06	834216	1.02264e+06	768780	637648	917009	1.77925e+06	2.09279e+06	1.15169e+06	973957	911560	1.35664e+06	1.62493e+06	1.5231e+06	1.69062e+06	1.86176e+06	1.57014e+06	1.58478e+06	1.77205e+06	1.42547e+06	1.1361e+06
428.317139389864/21.3835	842909	732212	1.26932e+06	0	71230.7	0	304859	343094	134054	295604	0	170302	2.32755e+06	0	3.38493e+06	1.67042e+06	846607	3.89607e+06	3.17885e+06	0	290778	328339	454073	0	0	139161	117244	77816.7	94135.9	56760.5
519.328815162551/14.4751666666667	1.67381e+06	1.20789e+06	1.36631e+06	1.35502e+06	2.11624e+06	713760	862404	1.36205e+06	431912	1.31632e+06	555943	186521	652690	283641	436535	555600	464366	322956	282013	386807	750729	713308	685177	806082	1.00845e+06	2.10847e+06	580129	734411	750623	287799
456.300291562447/16.0046666666667	1.05798e+06	829091	2.1531e+06	1.1834e+06	927699	601143	631258	2.08682e+06	657925	1.13809e+06	1.05445e+06	752302	1.68065e+06	1.3327e+06	712101	730889	772407	1.00766e+06	681887	842808	1.20577e+06	883423	782289	791399	845548	836290	703442	678162	674207	703735
281.142948407581/1.83658333333333	739430	706788	340165	419686	804088	820489	664466	630378	885606	849454	700560	837819	609596	702726	753544	1.2552e+06	1.11589e+06	1.07239e+06	814194	685590	576583	729784	671154	765276	739819	697871	594318	774539	615217	457931
500.305461789617/11.416	1.11014e+06	1.3378e+06	532980	954483	1.03872e+06	646937	1.22565e+06	4.19968e+06	1.10076e+06	656942	1.21976e+06	751560	436250	3.13395e+06	557604	586237	1.01825e+06	2.01508e+06	1.03966e+06	1.33184e+06	975927	1.04081e+06	0	0	572031	1.52304e+06	821572	1.30451e+06	173141	407383
603.294628604471/16.0376666666667	400936	573480	0	2.78643e+06	3.15089e+06	3.49385e+06	750658	81844	3.26909e+06	1.03709e+06	1.60894e+06	165654	1.24926e+06	339330	2.35865e+06	271807	2.3735e+06	391928	3.7637e+06	1.56307e+06	1.15299e+06	1.64974e+06	240323	1.24775e+06	1.03214e+06	912461	1.17388e+06	843994	681533	713698
182.203988810249/2.18158333333333	542995	619638	633619	438442	582839	593915	610078	409058	590580	244453	819700	472319	665928	652665	576849	87676.6	394710	160572	580892	742942	676594	778976	720792	734270	786544	832290	828366	847948	1.0492e+06	938741
255.231907461229/21.1098333333333	2.29795e+06	1.34352e+06	2.45304e+06	12900.1	37893.8	26293.8	925625	1.97011e+06	772087	2.12491e+06	0	726125	2.02664e+06	7980.92	469236	585631	515925	1.44691e+06	445086	0	1.78654e+06	2.5554e+06	1.1473e+06	0	520564	1.44089e+06	819359	825865	1.28836e+06	797333
546.355441398476/16.6748333333333	1.15584e+06	1.18298e+06	1.44245e+06	965613	493062	807077	784941	784643	808896	1.53045e+06	139836	113469	238935	107110	172895	209745	290811	165778	178524	133299	1.20792e+06	841790	930240	1.22735e+06	1.1486e+06	1.33601e+06	691962	691858	864798	772298
157.060824992896/10.468	1.02588e+06	772256	892759	605828	1.0828e+06	1.15272e+06	1.02206e+06	877432	1.2527e+06	1.22377e+06	526121	699154	1.02659e+06	799986	927947	694938	485524	1.09862e+06	772406	1.26964e+06	735689	671860	587090	651762	671507	643407	570522	454783	673185	819287
362.327779946941/11.7328333333333	633417	622505	662963	648370	580776	634196	609072	664808	613001	636646	834948	914016	936128	893154	909096	925308	866839	841092	927298	927408	633678	455303	599505	567925	704583	565718	671322	599665	573875	646000
524.278618467683/14.4905	606755	773734	996867	1.40323e+06	816802	672586	703358	49124.9	562499	412332	785807	640923	1.60251e+06	573859	691082	668028	736474	507400	574296	852209	815541	743511	596516	674490	1.07219e+06	647972	476293	667557	889201	716747
294.15516179448/2.0735	3.51916e+06	740909	897828	2.08697e+06	4.09943e+06	4.78412e+06	2.1618e+06	2.66958e+06	4.47152e+06	3.99288e+06	2.85545e+06	602683	1.76641e+06	2.00794e+06	1.65071e+06	5.41949e+06	6.14939e+06	1.47543e+06	1.23172e+06	2.51033e+06	3.26622e+06	2.82303e+06	6.72161e+06	8.53268e+06	8.74761e+06	7.6648e+06	6.76997e+06	6.81447e+06	5.10605e+06	4.82697e+06
761.588854006046/21.339	0	0	0	0	602256	696303	4.12715e+06	965295	3.42905e+06	4.50953e+06	623748	2.24205e+06	703860	531851	6.77283e+06	4.30714e+06	3.49618e+06	0	0	97977.4	0	0	0	0	810246	5.48243e+06	5.85108e+06	2.81571e+06	3.45533e+06	2.99538e+06
286.274585517271/12.9549166666667	747291	967639	908637	1.11321e+06	682482	885471	1.15346e+06	448370	994480	522540	347038	910271	743097	457785	413783	943451	657831	240761	520194	503267	979381	65687.8	808661	801766	786013	636277	733855	652838	745606	740233
526.294409618812/15.5088333333333	1.31077e+06	2.02316e+06	1.7323e+06	3.34985e+06	2.23473e+06	1.71725e+06	1.87213e+06	939045	1.55924e+06	1.10408e+06	2.46627e+06	2.97271e+06	2.96771e+06	2.04349e+06	3.02485e+06	2.40944e+06	1.88848e+06	1.72544e+06	2.76277e+06	2.51576e+06	1.84825e+06	1.58676e+06	2.20348e+06	1.58394e+06	2.44428e+06	1.82172e+06	1.68855e+06	1.99182e+06	2.41501e+06	2.3732e+06
470.421912637138/18.8645	1.4245e+06	901869	470618	526866	899945	758004	986559	616454	1.03253e+06	864582	634795	778875	203370	358151	859869	955391	392137	567552	794331	133524	764051	928025	849699	575369	436274	275788	598234	1.00322e+06	419119	126983
393.211141978439/6.59941666666667	161007	1.44469e+06	1.18652e+06	127334	960320	158600	186665	1.42527e+06	143596	1.42893e+06	1.12995e+06	165473	134229	1.14725e+06	1.15948e+06	118598	92593.3	220140	1.07252e+06	285162	157502	1.17099e+06	121491	1.47861e+06	132257	2.46449e+06	163236	2.41845e+06	1.18553e+06	283670
652.41135480489/7.64566666666667	64734.4	998375	747501	47089.9	648795	61510	61518.8	1.19731e+06	54689.3	1.23897e+06	1.1511e+06	113066	73181.6	1.3516e+06	1.64473e+06	64943.6	54451.7	114123	971923	141919	56665.8	698267	41398.4	1.11178e+06	58470.3	2.69586e+06	75139.9	2.23731e+06	845484	141338
481.26278690431/7.025	159442	1.45395e+06	1.14047e+06	95448.1	974057	143081	161472	1.47102e+06	26296.3	1.51628e+06	1.2567e+06	34731.4	129977	1.30105e+06	1.24682e+06	112944	103180	221410	1.08878e+06	279462	127724	1.13041e+06	103292	1.44323e+06	124009	2.56902e+06	144911	2.4647e+06	1.21179e+06	267924
808.583900331735/21.007	0	0	0	3.88509e+06	3.48399e+06	1.83202e+06	2.15927e+06	1.78098e+06	1.27094e+06	5.86635e+06	2.00765e+06	3.42876e+06	1.01104e+06	1.6472e+06	2.62353e+06	787007	1.04826e+06	0	0	1.30634e+06	0	0	0	4.54237e+06	1.97254e+06	985764	1.11094e+06	1.03169e+06	2.14397e+06	1.42555e+06
761.587764805747/20.9980833333333	0	0	0	0	469552	305852	3.32015e+06	448884	6.27947e+06	9.14397e+06	1.81267e+06	1199546	636904	1.15411e+06	3.24561e+06	1.76998e+06	1.88282e+06	0	0	0	0	0	0	0	763835	3.47031e+06	3.22779e+06	2.52039e+06	2.8981e+06	2.55052e+06
220.119194964795/5.54983333333333	585028	615456	850084	709235	860088	619511	683118	42420.9	724355	28181.4	737156	1.23302e+06	1.57783e+06	909147	1.01901e+06	872511	674453	685256	1.121e+06	904728	547115	493743	756183	753989	1.02991e+06	933653	649728	572381	822109	784324
394.332670797674/21.4889166666667	740872	672078	1.17781e+06	0	0	0	236702	277990	109088	225020	0	242947	2.83266e+06	0	4.02592e+06	2.09556e+06	924989	2.92381e+06	2.69429e+06	0	312932	280414	405353	3889.3	0	111611	96326.4	77164	76683.6	47392.3
352.28585303527/19.6373333333333	481750	453516	475722	778820	761424	320763	294169	337884	227517	272245	1.24517e+06	2.02646e+06	1.83647e+06	1.65228e+06	2.02676e+06	1.37047e+06	965792	1.72373e+06	1.28247e+06	1.35171e+06	287933	299407	281624	267297	196865	200287	191437	188061	197844	174031
104.05340144284/1.84891666666667	800707	741970	992722	765120	840366	771221	743239	894819	684452	889439	877753	985751	792322	1.0086e+06	845371	837871	767189	1.05167e+06	760750	830905	547879	576105	609593	487049	448030	477190	493055	563126	499864	426303
689.350499732436/14.4146666666667	900125	1.42052e+06	319697	1.09949e+06	1.30442e+06	1.43349e+06	1.24782e+06	551531	1.31667e+06	692865	1.19762e+06	1.22033e+06	1.51305e+06	845095	1.38718e+06	2.16547e+06	2.32011e+06	1.0185e+06	976154	1.32334e+06	1.07385e+06	996496	1.03692e+06	1.20229e+06	2.08999e+06	1.4311e+06	929647	1.30909e+06	1.88174e+06	902610
330.251686902067/20.9795	1.47115e+06	1.17668e+06	1.62394e+06	124847	173478	70418.7	727836	1.21393e+06	475572	829523	146082	180085	1.27597e+06	1.53404e+06	1.22805e+06	1.0407e+06	782116	2.10343e+06	1.103e+06	167184	1.31126e+06	1.33965e+06	1.14766e+06	77302.4	76170.2	706048	612848	539787	707134	524148
570.347588619784/15.0833333333333	672215	906331	470972	600937	779888	904052	681372	476291	557454	76553.8	730426	528554	723351	539266	674960	873146	992949	611605	492199	799560	740596	911399	688824	608670	902865	856550	609137	988340	690931	612196
279.232153689024/20.5198333333333	1.93799e+06	1.03521e+06	1.49654e+06	266371	66473	613258	1.07212e+06	1.8698e+06	366976	1.82035e+06	400830	701039	1.28348e+06	301051	802419	853644	579865	1.80824e+06	614882	173593	820621	1.0193e+06	889383	185471	240919	1.86006e+06	781994	906435	884573	424762
547.332847067878/7.36333333333333	59039.3	858732	740342	33953.9	516224	45344	51238.2	1.162e+06	37271.5	1.21175e+06	998720	72100.6	50261.5	1.10192e+06	1.1381e+06	37183.5	29983.7	93911	756944	119576	42433.2	736539	31438.3	1.09378e+06	39797.5	2.85118e+06	60213.8	2.22979e+06	771860	123880
832.584556089077/20.6296666666667	18394	0	217395	256292	3.68258e+06	1.60912e+06	1.20196e+06	2.74928e+06	946868	4.41088e+06	219010	1.73923e+06	2.78408e+06	4.65856e+06	547471	4.69612e+06	1.78809e+06	0	148296	702932	0	0	142484	194981	542695	2.69744e+06	1.57148e+06	1.17783e+06	1.79601e+06	1.09519e+06
555.294518859546/17.03325	1.73156e+06	2.14131e+06	571071	854447	1.42712e+06	1.61662e+06	1.14013e+06	970484	1.07962e+06	732608	1.77516e+06	1.1441e+06	1.59019e+06	1.64196e+06	1.56822e+06	1.04018e+06	1.1297e+06	1.24696e+06	2.63788e+06	1.53179e+06	2.3871e+06	1.13973e+06	1.80102e+06	1.35748e+06	1.19158e+06	1.2693e+06	1.95639e+06	1.46407e+06	1.56927e+06	1.80233e+06
726.354786513136/13.7698333333333	473188	570599	749834	1.13167e+06	1.07436e+06	1.05281e+06	1.29056e+06	1.0961e+06	967442	1.04603e+06	824684	722137	958417	649479	687650	684634	876353	294564	708092	779914	219872	186468	322911	441993	693610	617835	618809	620871	739095	1.04972e+06
504.310060858479/16.0868333333333	692731	778808	718663	1.14282e+06	282751	622315	732318	204934	905746	353604	186929	580181	258112	122376	409015	703620	661716	213855	440641	433419	1.02236e+06	647507	592248	975486	849642	434627	422396	468911	625168	544706
344.134892750735/1.4075	2.00003e+06	2.08245e+06	698954	1.13561e+06	1.7682e+06	2.34957e+06	1.35868e+06	1.44189e+06	1.85699e+06	1.92755e+06	1.71773e+06	2.85231e+06	1.52535e+06	2.15608e+06	1.87607e+06	4.66054e+06	3.35063e+06	4.33838e+06	1.95132e+06	1.47137e+06	1.23366e+06	1.48541e+06	1.61023e+06	1.49713e+06	1.48876e+06	1.13719e+06	1.07326e+06	1.41367e+06	1.12597e+06	908243
242.100062966166/5.1995	692510	826537	961383	981350	1.12934e+06	795582	908771	663452	860694	687853	476714	645098	956073	475825	710881	457782	499454	381026	652217	646540	795920	708268	1.01613e+06	977193	1.16885e+06	1.16208e+06	957210	795292	948880	882891
434.27122772258/20.5910833333333	1.6851e+06	1.11979e+06	1.75951e+06	42437.3	1.51383e+06	10755.2	124617	431958	76065.5	225194	608994	672143	953318	1.38188e+06	1.15666e+06	444083	324623	4.26812e+06	1.59174e+06	1.01714e+06	647213	716900	33734.3	0	37809	71926.4	52350.2	55492	61483.3	18222.8
907.687727203866/8.26691666666667	497864	684501	618013	686221	678348	514978	594734	710390	503308	739516	816797	754155	581991	783035	781641	752091	590719	705785	636963	1.1981e+06	667434	558915	583530	790221	504765	960931	628020	803278	643346	523745
573.37513828451/17.021	2.06589e+06	1.00459e+06	1.05277e+06	851268	911608	650854	718870	1.56729e+06	580026	1.53506e+06	343686	337356	644999	420025	416891	638424	757463	726183	459523	590611	872129	943908	531521	614855	751705	910192	498461	676603	741537	396064
385.307242199776/17.8418333333333	767150	684407	711902	746571	1.1954e+06	484586	494833	557021	336043	749137	1.03186e+06	1.19967e+06	1.36044e+06	1.07956e+06	1.37842e+06	947218	571999	1.09826e+06	1.13047e+06	899521	376378	364114	328191	256807	190395	303503	240451	276406	283920	164794
784.584591775603/20.6220833333333	0	0	0	10947.9	427549	422753	1.25955e+06	5.50348e+06	2.81961e+06	6.12679e+06	471268	1.5092e+06	394298	679616	856909	320701	795488	0	0	228357	0	0	0	37086.7	762585	3.55955e+06	2.48724e+06	3.93625e+06	3.31741e+06	1.96315e+06
355.264148650442/12.3756666666667	869592	283711	116223	287721	542993	1.40576e+06	448753	115435	217295	566339	447424	2.76072e+06	735495	324343	1.4752e+06	566551	461972	457207	1.41128e+06	259547	28402.1	566740	387629	359839	849991	2.24899e+06	561958	1.07589e+06	159349	347340
311.131266940599/4.917	1.68245e+06	1.36795e+06	827630	881789	1.58638e+06	1.51579e+06	1.57062e+06	1.56115e+06	1.64576e+06	2.49255e+06	1.56615e+06	1.82082e+06	2.03182e+06	1.44649e+06	1.55599e+06	2.75065e+06	2.48251e+06	2.62172e+06	1.14576e+06	1.41734e+06	1.21215e+06	1.43471e+06	1.39239e+06	1.54503e+06	1.82607e+06	1.4393e+06	1.17238e+06	1.94735e+06	1.41839e+06	1.09711e+06
809.587896461651/24.524	0	0	28220.4	47437.4	4.71409e+06	3.90964e+06	2.58677e+06	2.85913e+06	2.7551e+06	632569	4.78319e+06	815633	1.74136e+06	4.85892e+06	796360	1.50622e+06	497888	21117.3	53165.4	1.09121e+06	0	0	22336.5	58819.3	4.93998e+06	2.61365e+06	1.2349e+06	2.17225e+06	2.08184e+06	1.74769e+06
469.313350359676/17.1485	637460	579925	2.38887e+06	999800	530103	375807	434324	1.52089e+06	476835	620342	563133	772547	2.55125e+06	1.07853e+06	659848	725525	735927	597221	615886	568681	836112	538669	573933	672598	719292	581724	411697	343304	418605	450446
936.085307009726/7.40408333333333	0	1.50996e+06	594311	1.85562e+06	1.81132e+06	1.93881e+06	873717	202118	1.31769e+06	236726	895401	1.69797e+06	1.72321e+06	653241	2.15871e+06	1.95539e+06	1.96167e+06	390345	2.24747e+06	1.79052e+06	0	365954	1.09716e+06	751664	816899	0	0	835210	594927	299266
333.335316698399/15.8895833333333	717062	747351	544713	565406	726756	797758	313762	1.78585e+06	47029.5	1.08474e+06	768663	555316	554586	383280	581782	763342	652859	405629	405543	530908	16483.8	385084	170558	488154	439363	480796	686493	824686	478514	679494
544.339058847345/16.745	1.94022e+06	1.8814e+06	1.3387e+06	3.1861e+06	1.7405e+06	1.77676e+06	1.61337e+06	1.64803e+06	2.75175e+06	1.49621e+06	1.1983e+06	1.04534e+06	1.32508e+06	1.25722e+06	1.21647e+06	1.36363e+06	1.75184e+06	1.57178e+06	1.20675e+06	1.1668e+06	1.80695e+06	1.98071e+06	1.84619e+06	1.73985e+06	1.74393e+06	1.76304e+06	1.63529e+06	1.7199e+06	1.88934e+06	1.54761e+06
828.552478668752/20.98475	0	0	0	8.15867e+06	1.07882e+06	595170	250566	505024	136425	217627	1.01309e+06	188542	586928	860432	3.26883e+06	529478	388953	0	101077	1.71479e+06	0	0	0	2.52324e+07	1.28862e+06	329569	328264	73501.1	180119	228119
806.566218427894/22.656	0	0	721397	241081	628696	775187	1.58106e+06	2.18811e+06	2.34019e+06	1.82227e+06	7.13428e+06	3.13605e+06	1.41232e+06	674859	2.83063e+06	857038	1.51234e+06	0	38787.5	159686	0	0	574654	221779	1.1581e+06	1.93031e+06	3.54237e+06	2.45921e+06	1.81191e+06	3.37026e+06
759.574973146427/18.371	0	0	0	0	0	1.14965e+06	3.33559e+06	1.10276e+06	2.69694e+06	3.8086e+06	2.76722e+06	5.89082e+06	5.05777e+06	5.23003e+06	205124	4.43029e+06	4.66667e+06	0	0	0	0	0	0	0	275179	3.11954e+06	3.88547e+06	2.98542e+06	3.23173e+06	3.67062e+06
782.566947239087/20.3259166666667	0	0	0	210622	2.52268e+06	648227	1.58512e+06	969213	1.43329e+06	1.64951e+06	2.21606e+06	1.95178e+06	1.71936e+06	1.92418e+06	1.93092e+06	1.21016e+06	1.66256e+06	0	0	3.96538e+06	0	0	0	523601	931228	1.94843e+06	1.53753e+06	1.98037e+06	1.85415e+06	1.24176e+06
130.05037272334/1.19616666666667	689207	912252	781733	732460	663158	838531	909795	627768	807561	709310	736409	651628	648009	701246	587907	579481	643422	771138	674401	746835	878767	777886	790818	743004	753752	729523	918235	689769	726469	793458
686.251923609724/1.5645	2.06687e+06	754183	0	0	0	315910	82263	0	1.452e+06	1.98623e+06	0	0	0	0	0	843975	1.93846e+06	0	0	0	6.63482e+06	4.81058e+06	4.42267e+06	4.52149e+06	4.05984e+06	6.14818e+06	6.46214e+06	4.49499e+06	4.73333e+06	5.20102e+06
370.331952958454/22.4275833333333	1.6655e+06	1.47148e+06	1.82795e+06	0	0	0	408024	709759	301360	1.04578e+06	0	0	1.05704e+06	0	1.56107e+06	816704	725724	2.27301e+06	2.14823e+06	0	736592	644808	719985	0	0	207849	204658	63694.7	195380	126535
756.555746771956/21.339	0	0	0	2.68078e+06	912965	1.31497e+06	1.72481e+06	1.86874e+06	1.26056e+06	1.54984e+06	1.9386e+06	3.30095e+06	1.70056e+06	39433.9	5.65489e+06	4.64579e+06	5.18437e+06	0	0	5.3046e+06	0	0	0	870636	1.58388e+06	1.37041e+06	1.26287e+06	1.12575e+06	598397	708092
784.582672412914/22.75825	0	0	0	372972	867477	1.95989e+06	2.57081e+06	3.30921e+06	2.58784e+06	3.49934e+06	269967	1.42005e+06	734724	1.46181e+06	2.74514e+06	1.43318e+06	1.90137e+06	0	0	224778	0	0	0	816456	1.43129e+06	3.63274e+06	4.31489e+06	1.41083e+07	3.09283e+06	2.22798e+06
832.585905717994/21.3405	56215.5	0	134873	1.47354e+06	224428	796064	1.0941e+06	5.56945e+06	447389	2.63239e+06	865181	2.25787e+06	2.21473e+06	1.06087e+06	1.23653e+07	3.85242e+06	1.73556e+06	0	233727	2.21218e+06	0	0	133461	640433	2.9825e+06	2.50993e+06	2.16759e+06	414302	812969	1.11777e+06
690.353536940327/14.7410833333333	1.27233e+06	1.42512e+06	603621	750611	723254	787649	602870	988191	647527	580228	1.00768e+06	1.4867e+06	1.11734e+06	1.07184e+06	1.93139e+06	2.28313e+06	2.20206e+06	1.7352e+06	1.13e+06	1.9671e+06	1.05399e+06	1.17334e+06	1.02513e+06	1.15795e+06	1.8898e+06	1.25965e+06	1.04822e+06	1.42575e+06	1.64056e+06	892387
328.302187100095/4.91583333333333	1.53795e+06	1.20392e+06	0	219333	1.50706e+06	1.27474e+06	988156	1.08253e+06	1.45843e+06	1.56109e+06	1.06962e+06	1.26109e+06	1.00206e+06	821307	1.03985e+06	2.07442e+06	1.97508e+06	1.82836e+06	826351	988508	817030	1.25648e+06	1.0178e+06	1.29695e+06	1.24633e+06	1.05442e+06	654403	1.22956e+06	894780	0
157.060837664345/7.08183333333333	412269	609372	529446	650534	619906	488419	448972	352350	482102	339435	200885	676781	671832	246481	559082	522942	337406	243860	644178	355592	520462	726533	907685	442661	714748	609717	701010	720705	956777	780391
344.134724947047/2.81383333333333	2.13312e+06	1.68519e+06	783979	1.68798e+06	2.6125e+06	2.08963e+06	2.17719e+06	1.63654e+06	1.84279e+06	2.74829e+06	2.24957e+06	3.20324e+06	1.45523e+06	2.17937e+06	2.28681e+06	2.68105e+06	3.66086e+06	3.90746e+06	2.59015e+06	1.70888e+06	840100	1.40286e+06	976609	980364	864177	1.02683e+06	765559	2.52729e+06	783942	606818
495.329141400976/14.74	1.25724e+06	1.46347e+06	1.50377e+06	913880	399019	381374	378933	1.04154e+06	701810	387058	118311	252414	918218	106999	120763	196028	472901	255768	138695	146732	2.2723e+06	1.20094e+06	1.06498e+06	729281	2.31322e+06	1.3216e+06	791977	942319	1.42149e+06	1.25534e+06
483.364696728295/16.6545	624199	585018	1.65783e+06	759679	794627	481091	435807	1.4064e+06	584117	914071	629187	545328	572448	1.57838e+06	520501	462418	410858	532708	594333	398843	735208	658029	761978	611812	386203	503894	547405	664270	430702	494015
509.381117564841/17.2695	1.23237e+06	847303	2.82733e+06	1.04349e+06	1.19084e+06	699859	570352	2.5238e+06	693461	1.64396e+06	911084	510184	754530	1.23969e+06	533206	537046	445895	739187	619588	464451	891088	700430	626829	681527	418323	533184	530243	702223	460131	454186
497.540521322161/16.1128333333333	879820	776750	1.29756e+06	1.0904e+06	891060	738181	821664	1.04877e+06	811795	752553	643550	421024	1.40132e+06	639338	576385	510408	841616	672895	633803	501276	947240	845652	839696	837129	969887	867632	747265	764315	854420	813638
525.289076694449/7.20116666666667	119446	1.2073e+06	911259	78637.7	786944	118089	119104	1.24392e+06	95723	1.29548e+06	1.0541e+06	149466	89002.3	1.10111e+06	1.04332e+06	84858	71474	177999	872682	232512	98368.7	928060	70835.4	1.21978e+06	87258.7	2.11797e+06	107296	2.02564e+06	954254	210229
152.055329042918/1.849	741432	689587	913424	665777	767246	701398	692720	821014	622729	774116	805176	904419	804204	949937	805376	745506	718730	993762	683093	788730	542050	569169	602822	506763	470785	492590	510843	538665	458229	428419
389.257405513568/6.5965	63079.2	1.04061e+06	850346	69356.3	746900	75193.4	89390	1.13033e+06	69197.6	1.16913e+06	1.05932e+06	123691	89066.4	1.20193e+06	1.43771e+06	65198.6	53175.5	101501	1.01252e+06	173982	75772.3	757628	63306.5	1.12321e+06	72437.5	1.83258e+06	84991.8	1.73875e+06	835867	161522
860.432169701314/6.24816666666667	1.14456e+06	332019	488688	436947	895217	270677	609100	408467	585541	908580	558755	615894	446681	984750	591662	641426	324967	647837	444406	946232	879084	772651	866479	382526	199863	637027	676968	668222	555693	55125.8
616.347477645274/14.9035	1.04439e+06	742667	1.28527e+06	834654	1.18571e+06	531658	757424	4.35744e+06	676322	2.07783e+06	1.19222e+06	800394	1.97888e+06	1.42624e+06	867509	1.24701e+06	1.20504e+06	1.63567e+06	630646	1.04847e+06	711660	625726	489815	723983	822790	1.02111e+06	669318	583433	614593	440483
761.588034291358/20.6231666666667	0	0	0	0	74832.9	424951	2.69384e+06	475855	2.73598e+06	6.26113e+06	911424	1.67151e+06	402470	844500	1.24931e+06	749242	1.32953e+06	0	0	0	0	0	0	0	512692	4.36373e+06	2.92498e+06	3.00306e+06	3.47276e+06	3.0618e+06
818.586852853574/12.3599166666667	402897	86016.1	10794.1	70343.8	210839	1.15252e+06	185096	6463.97	80621.9	240784	170123	3.77265e+06	438785	89738.8	678552	269122	182065	200742	1.22572e+06	65291.3	0	313803	153433	163505	387525	2.25887e+06	326434	699158	27180.7	129561
183.084268755561/1.573	2.76146e+06	2.29423e+06	3.04142e+06	2.46644e+06	2.59649e+06	2.69205e+06	2.28897e+06	2.88791e+06	2.12402e+06	2.81883e+06	1.25238e+06	3.14989e+06	2.39471e+06	3.27919e+06	2.41074e+06	2.90431e+06	2.85143e+06	1.92834e+06	1.99275e+06	2.50309e+06	1.78526e+06	1.74228e+06	2.39564e+06	1.87067e+06	1.43575e+06	1.60634e+06	1.74659e+06	2.04655e+06	1.83673e+06	1.4384e+06
306.251450658737/21.3570833333333	1.64265e+06	1.28341e+06	1.96174e+06	0	0	100669	878188	1.01319e+06	605466	1.04402e+06	0	146447	158725	0	846199	723449	530459	1.59644e+06	722584	0	1.56375e+06	1.50454e+06	1.1907e+06	0	164278	916311	660570	93769.9	719357	537833
149.059811710176/4.75	1.56656e+06	1.41563e+06	1.66953e+06	1.36908e+06	1.43962e+06	1.47109e+06	1.28477e+06	1.52759e+06	1.29194e+06	1.67025e+06	1.68774e+06	2.01127e+06	1.47728e+06	2.06169e+06	1.60824e+06	1.92944e+06	1.78543e+06	1.77285e+06	1.28186e+06	1.59935e+06	1.36687e+06	1.32412e+06	1.50085e+06	1.23297e+06	1.05573e+06	1.09046e+06	1.23688e+06	1.24752e+06	1.19269e+06	1.06239e+06
726.560959391764/24.4545	0	0	4.20261e+06	51193.1	1.29008e+06	1.51441e+06	144222	1.56393e+06	845988	873510	0	1.40479e+06	522727	2.28712e+06	1.68976e+06	1.39706e+06	492034	0	0	747967	0	0	1.27525e+06	816352	1.15718e+06	1.13296e+06	900902	1.00222e+06	998738	926942
159.091629761553/5.766	999269	839762	980689	723438	798329	869185	703186	930703	754924	1.0706e+06	956077	1.22997e+06	702427	1.28068e+06	940026	1.24744e+06	1.11073e+06	1.09498e+06	658821	873012	846616	825400	950597	721249	584656	644794	717091	777164	725869	588637
644.378442713405/17.187	2.31666e+06	2.17249e+06	633899	755899	917883	518181	434423	1.58571e+06	1.81431e+06	513350	739794	703685	1.34563e+06	790916	872100	3.75179e+06	2.45141e+06	1.06237e+06	577327	1.6718e+06	624004	717060	2.07212e+06	767647	1.76987e+06	2.23558e+06	644942	362130	2.1803e+06	1.53959e+06
413.291846973232/20.5883333333333	730080	486558	959289	459082	69480	21059.3	177403	490817	124858	316964	1.19881e+06	1.4067e+06	1.48617e+06	2.01554e+06	1.45999e+06	932238	592111	1.98356e+06	1.02724e+06	1.34009e+06	310491	415730	234184	0	60271.5	119551	85513.6	93335.1	96173.9	46810
266.12360076733/1.32425	306920	94616.8	231866	397216	196060	302790	299947	446212	313666	412935	1.17245e+06	1.74466e+06	326381	777263	2.16389e+06	1.78193e+06	1.33026e+06	1.83234e+06	513151	1.80401e+06	180171	199736	271210	266469	311473	231657	249059	44681.8	180010	118649
526.378580328482/18.0373333333333	894410	991481	1.17071e+06	1.0623e+06	736025	634962	522807	745744	578239	808218	490051	472386	1.45164e+06	469328	579220	641260	843476	565482	698348	498890	932365	859632	786194	926557	1.31927e+06	1.05056e+06	791158	759039	752883	828118
542.325367741848/14.4161666666667	787114	964246	1.17077e+06	1.13545e+06	397000	441970	110054	352327	132809	244147	419380	422609	1.77141e+06	234318	400002	671928	1.24689e+06	164923	283874	358712	1.68458e+06	562806	582730	1.0249e+06	1.67967e+06	928966	468257	353749	699763	477449
332.288034383841/21.6051666666667	2.00779e+06	1.65043e+06	1.68306e+06	79387.1	77634.5	0	397215	472870	332183	395507	0	22868.1	479660	0	751903	559921	403835	1.7546e+06	1.56989e+06	0	1.92502e+06	1.86246e+06	1.47121e+06	42643.9	0	376561	359433	363429	372036	381556
854.569286073147/21.1028333333333	40452.6	0	99456.3	1.93198e+06	725838	5.44338e+06	698680	1.4348e+06	1.65176e+06	774895	2.77901e+06	1.62361e+06	1.25715e+06	2.98141e+06	1.62651e+06	1.61584e+06	983458	0	107787	2.2227e+06	0	0	79327.8	1.82875e+06	2.39565e+06	1.61856e+06	4.12478e+06	513372	1.29889e+06	1.99187e+06
784.583186176517/24.4548333333333	0	0	0	1.81474e+06	2.0217e+06	1.66594e+06	1.24527e+06	797737	279702	1.04641e+06	7.84516e+06	2.01898e+06	1.39899e+06	7.51546e+06	381110	716729	1.11565e+06	0	0	873954	0	0	0	1.88273e+06	1.69214e+06	986110	1.11331e+06	1.04363e+06	1.03537e+06	1.03512e+06
468.405901728801/17.8250833333333	1.0883e+06	631716	737424	553839	336393	670340	995118	710895	1.31324e+06	823780	589571	598854	311870	438679	586264	1.01436e+06	581686	705499	617110	549533	187240	175336	372172	536585	363665	184274	437983	392265	343162	98825.1
775.212524924216/2.93383333333333	1.11723e+06	1.79364e+06	361129	1.35339e+06	1.50875e+06	2.38337e+06	1.67635e+06	311372	2.17803e+06	1.75763e+06	493607	1.59801e+06	1.67108e+06	76631.2	3.11677e+06	3.84504e+06	4.46718e+06	952775	4.43112e+06	342518	1.1269e+06	1.66725e+06	1.73781e+06	1.56515e+06	2.17102e+06	1.48262e+06	1.68267e+06	1.73206e+06	232198	1.35467e+06
761.584461262244/21.6395833333333	0	0	0	10339.8	496230	374420	3.86206e+06	380854	2.88784e+06	4.16003e+06	403225	3.0869e+06	746614	1.45934e+06	6.36813e+06	3.78766e+06	2.62671e+06	0	0	305183	0	0	0	0	578822	5.13195e+06	3.40796e+06	2.95823e+06	3.52636e+06	4.04146e+06
583.256649999963/12.1708333333333	533035	610041	698338	490280	571074	411143	502084	724961	542437	861180	599851	571513	529446	628761	511558	458136	505827	466241	525574	366817	452357	725192	625751	810410	791114	952845	744105	1.16588e+06	600178	537869
787.168020303332/5.767	549601	654330	657340	797511	691276	683109	692524	363515	629281	527658	449164	528298	563912	551229	700458	583670	597050	442627	652394	656510	691387	588306	799866	704563	675106	736522	796350	710757	636301	662943
615.159967641284/2.13933333333333	1.52154e+06	1.31155e+06	488320	1.23333e+06	1.63165e+06	707119	1.16563e+06	480379	1.01423e+06	442982	554336	1.0706e+06	1.60989e+06	126922	1.35943e+06	1.33751e+06	1.50556e+06	71372.2	1.95481e+06	356991	1.52043e+06	1.78454e+06	1.73521e+06	1.52197e+06	1.5292e+06	1.61255e+06	1.84572e+06	1.78336e+06	1.52885e+06	215225
597.365701145872/12.986	687532	765866	666990	780506	1.29826e+06	1.51283e+06	774397	1.29804e+06	454673	1.50404e+06	173935	126251	114895	334215	266024	197798	116397	78399.1	229958	88100.5	621654	216404	479242	562314	2.17154e+06	4.35529e+06	1.65301e+06	906529	471373	470320
247.166438495948/24.423	1.68764e+06	1.76157e+06	1.60907e+06	0	800842	91908.9	781966	878064	683523	705968	53174.3	56090.6	398902	991288	719364	624743	386493	1.93346e+06	1.80447e+06	51060.4	1.31982e+06	1.40479e+06	1.35006e+06	104284	85258	634950	680005	77181.6	631362	695927
349.184345604341/6.333	112871	1.13284e+06	958201	103738	707903	110228	130742	1.10171e+06	103646	1.10623e+06	862069	109288	83853.3	855465	895158	76331.3	63780.2	138091	807283	203052	127152	907976	97858.3	1.15555e+06	104473	1.921e+06	134829	1.89981e+06	934261	211020
431.299884392936/10.8436666666667	899024	454280	382235	714924	1.42402e+06	693183	523253	860541	556769	1.27986e+06	598155	921699	797344	565767	1.00073e+06	784835	656069	640700	960222	562851	446334	647823	467231	465432	673908	1.70101e+06	751421	1.16723e+06	367192	322076
761.586951644324/24.5853333333333	0	0	0	0	25494.9	0	5.1097e+06	1.90745e+06	4.49819e+06	5.33754e+06	82473.1	679480	771268	32258.8	1.06535e+06	846161	1.9216e+06	30319.6	0	158926	0	0	0	0	0	4.21503e+06	3.91759e+06	3.77623e+06	4.39093e+06	3.81628e+06
502.294190490614/15.63	1.48283e+06	1.87654e+06	3.22898e+06	1.92128e+06	1.39521e+06	692054	1.72619e+06	1.10399e+06	1.69394e+06	351666	329916	552929	2.06749e+06	199399	627193	1.39546e+06	1.65789e+06	372822	624176	348264	2.3898e+06	1.45439e+06	833700	2.21592e+06	2.49773e+06	698407	581347	1.40677e+06	1.85897e+06	879623
146.165073598085/1.03075	1.20852e+06	829727	1.1144e+06	694416	764990	852264	768306	1.14071e+06	670416	1.19519e+06	1.01848e+06	711551	637737	1.2326e+06	704530	852864	663590	1.06954e+06	641679	686494	1.16358e+06	970599	838325	696718	606320	699094	694749	954699	763027	580577
530.316089135122/16.354	1.12533e+06	1.01876e+06	970447	1.36287e+06	1.07401e+06	829626	1.0132e+06	988533	660809	1.41512e+06	305841	339774	456230	388507	340985	322801	255612	443331	354810	477677	627913	775166	917632	668489	666137	878336	651689	922250	855663	830807
430.296703149262/12.3693333333333	850539	262656	147347	349573	1.9198e+06	258722	274606	1.2061e+06	287036	1.6572e+06	599241	503114	257882	1.04804e+06	462481	369215	407039	475304	502368	491905	261799	399103	187994	360456	353382	1.70456e+06	402102	1.40554e+06	124989	133716
448.343450783538/15.0779166666667	474441	331048	417793	503241	834593	563027	717284	830525	616602	623009	711748	587167	446873	887536	622711	327017	194125	779307	525202	625433	225735	649105	165053	327988	403994	336480	437674	716370	573618	425249
806.563515169001/21.6723333333333	0	0	215082	1.15154e+06	1.18597e+06	1.11091e+06	2.23537e+06	3.48912e+06	2.80438e+06	4.23647e+06	586254	1.0481e+06	2.48436e+06	584364	1.84181e+06	1.93264e+06	2.34409e+06	0	125040	704370	0	0	178402	1.38456e+06	1.11578e+06	2.16132e+06	1.81776e+06	3.13214e+06	1.84935e+06	1.67875e+06
279.159477938577/18.2335	904998	1.10652e+06	605704	905314	928062	563758	530415	1.07915e+06	533980	583356	1.06421e+06	675546	594294	704200	760274	982771	572660	1.73303e+06	866282	1.10199e+06	899135	984420	757611	786219	867412	730574	726383	720021	955227	1.04975e+06
649.342233334391/5.98383333333333	499297	1.07821e+06	436373	766357	579810	1.00409e+06	714869	907189	741837	186744	746405	209382	663855	190789	153183	144890	478087	150262	675246	336149	553278	451376	542510	660914	472364	480787	600094	567169	603212	599008
758.570160799534/22.7073333333333	51394	15638	0	0	1.92843e+06	1.10194e+06	5.73818e+06	1.42659e+06	1.23614e+06	2.33454e+06	1.41774e+06	1.37673e+06	3.43537e+06	2.79758e+06	212364	4.47339e+06	1.48038e+06	51209.6	0	1.44634e+06	0	0	10203.1	0	1.70612e+06	1.92863e+06	3.69502e+06	804140	1.75287e+06	4.39537e+06
123.049470324611/2.28791666666667	525822	2.18385e+06	794073	634174	634555	703368	2.00624e+06	1.35206e+06	653298	1.3827e+06	562478	672414	583538	883913	515825	541824	541190	830508	655545	633894	735673	756574	485692	815563	435703	926438	919915	570154	253888	1.01287e+06
462.344176656934/12.8580833333333	1.25256e+06	1.35383e+06	221035	665825	895183	1.41169e+06	1.3759e+06	566110	1.37551e+06	1.10193e+06	670761	749485	555594	500295	709558	1.47347e+06	1.56853e+06	618851	731531	833332	882592	923046	945769	1.08996e+06	1.23499e+06	1.36567e+06	1.24893e+06	1.43643e+06	1.15613e+06	801435
875.128726105599/7.41633333333333	0	1.55776e+06	1.14657e+06	2.5521e+06	1.59562e+06	1.83114e+06	993256	291414	1.38757e+06	176290	788110	1.27218e+06	1.70152e+06	788393	1.46455e+06	1.0616e+06	1.14003e+06	239437	1.38584e+06	1.18464e+06	0	410078	1.71829e+06	1.18914e+06	943068	0	0	965387	990917	515160
529.313262494269/15.7758333333333	618561	389088	1.19495e+06	955369	390154	271069	401140	567641	499238	251385	409438	582401	1.34535e+06	488076	600005	542424	688030	549001	558503	914217	833550	366669	415635	561291	917159	413870	367787	267926	455358	365283
804.552140327532/24.505	0	466015	483444	135646	2.82991e+06	2.29895e+06	1.06999e+06	1.39054e+06	877464	554243	48043.3	221957	452082	4.04284e+06	2.22011e+06	1.29163e+06	205473	0	966582	189250	0	222250	429421	298209	2.42171e+06	1.15323e+06	1.39975e+06	1.73068e+06	891971	1.28336e+06
302.565610625591/8.267	412220	579429	546848	570343	526644	388281	512733	562892	407086	539478	556032	509511	417903	496865	571242	482145	346313	499632	483435	820186	703122	607418	584460	781976	501519	893233	646710	769503	655228	565198
462.268759894924/9.88041666666667	996480	1.19848e+06	710154	999514	2.28174e+06	1.48871e+06	1.01569e+06	1.17244e+06	1.2213e+06	743203	152050	739064	619488	217682	673322	522816	385144	273674	417041	91951.9	1.02274e+06	460400	323182	20749.3	576465	1.78254e+06	874452	709605	50192.8	495727
282.118951250204/1.21583333333333	491158	696833	227011	631251	781030	783740	565264	412303	719893	589367	630015	649798	393327	554991	669244	1.02801e+06	1.10819e+06	709654	655784	538825	124984	475167	564247	554251	567404	444905	512325	441185	356462	364920
525.577592728903/18.488	875040	923776	953495	919049	718136	623806	556696	644473	588640	832240	440948	413682	1.0717e+06	415014	466650	585778	693500	541945	612822	515515	902019	853201	805272	883255	1.01001e+06	1.02221e+06	821714	811896	713413	842825
133.032131134169/1.57383333333333	1.8344e+06	1.72995e+06	1.90576e+06	1.62349e+06	1.71811e+06	1.83485e+06	1.40596e+06	2.02448e+06	1.41348e+06	1.95769e+06	2.28844e+06	2.48037e+06	1.66572e+06	2.78662e+06	1.94266e+06	2.27033e+06	2.20163e+06	2.71386e+06	1.63977e+06	1.91164e+06	1.32585e+06	1.25432e+06	1.50187e+06	1.00771e+06	900017	927236	1.16593e+06	1.16284e+06	1.08397e+06	872173
781.556383901836/24.507	0	8779.28	476835	46052.8	1.03659e+06	338891	612140	1.17302e+06	1.69371e+06	2.20499e+06	0	504356	6.89914e+06	1.14332e+06	1.43287e+06	1.92885e+06	7927470	0	988330	162133	0	0	577110	40574.5	481897	1.11879e+06	542779	520408	1.40575e+06	440894
264.144223819747/3.717	3.55922e+06	3.17812e+06	1.15808e+06	836322	3.4559e+06	4.31038e+06	2.66385e+06	1.5306e+06	5.64899e+06	3.24399e+06	545857	416386	845963	525792	718812	1.49434e+06	2.37502e+06	203430	1.28212e+06	1.21708e+06	5.75345e+06	6.24424e+06	4.99807e+06	7.51266e+06	6.11852e+06	7.15963e+06	4.15457e+06	5.9386e+06	5.50462e+06	2.50847e+06
810.599130583927/24.535	0	0	0	0	1.26019e+06	1.08369e+06	1.86825e+06	3.16117e+06	2.6209e+06	2.30464e+06	1.23579e+06	3.43133e+06	2.86765e+06	1.3924e+06	962723	398140	4.00246e+06	223284	0	1.18485e+06	0	0	0	0	1.3327e+06	3.39066e+06	2.66664e+06	2.37627e+06	2.11248e+06	2.6653e+06
137.046010338559/1.31216666666667	543817	375597	590329	591866	910464	431202	610218	865324	450952	659147	943806	415141	322531	816946	426103	387559	185780	648773	368190	888508	520684	489775	584185	799310	565786	775274	553825	591290	494106	589548
665.350590248377/14.4166666666667	889500	1.39941e+06	574971	1.1468e+06	810279	1.25556e+06	1.16542e+06	526438	1.42359e+06	842971	109947	184841	754141	73342.9	432033	1.26166e+06	1.31248e+06	207419	319726	619229	1.34602e+06	883973	1.05317e+06	1.69451e+06	2.14599e+06	1.38043e+06	888625	998273	1.11162e+06	852080
146.117426543582/5.666	583317	673937	799393	424069	667187	836024	487708	929624	479398	864421	571241	946991	806424	1.05345e+06	394414	567381	878577	484471	376686	746456	409553	481640	617346	504711	34298.8	383561	262081	285063	271472	569840
646.384594137529/17.5195833333333	1.12603e+06	1.04929e+06	1.03725e+06	1.0855e+06	1.197e+06	790180	805065	1.89255e+06	1.28035e+06	1.23718e+06	830453	863007	1.70849e+06	901833	925985	1.15237e+06	2.1669e+06	1.19689e+06	637159	865422	1.02453e+06	971600	929238	1.08588e+06	1.27578e+06	1.39432e+06	899536	859751	948283	635474
703.575598879367/23.956	0	0	0	1.30639e+07	283377	1.61627e+06	1.30011e+06	356257	1.6416e+06	449047	109669	9.40834e+06	383324	234030	2.19894e+06	93313.2	564548	0	0	990052	0	0	0	700009	1.63001e+06	2.13773e+06	1.55945e+06	1.89741e+06	2.20516e+06	2.11825e+06
278.123927036068/1.28458333333333	471061	513390	304297	491349	759728	620603	537828	639868	544084	683810	694253	867988	581495	631060	861513	1.12979e+06	977930	869197	649423	616080	240360	311890	368111	388171	397036	314624	282843	371415	304422	226075
276.280889722078/11.485	550652	600366	622817	657762	576576	638812	580925	537962	595448	585712	764867	874084	858519	812530	902209	828964	859404	725438	940345	874238	654013	484265	589681	558117	684018	505522	612762	511817	562596	602526
508.341066910308/18.8636666666667	562576	711957	2.55388e+06	1.11343e+06	349555	438088	471462	1.01856e+06	579803	685246	327188	419029	1.74178e+06	403142	414712	578609	1.00047e+06	489433	513058	390392	1.00131e+06	650832	495126	814017	825808	407531	342939	417423	514498	573289
510.391946838843/19.209	919978	902636	2.65492e+06	1.04262e+06	183980	663822	558873	1.56921e+06	684380	991834	388243	898929	670686	1.34076e+06	618396	555862	510791	470779	656077	345344	957703	826197	926768	920446	560951	702754	650890	759797	571320	574707
805.555686409243/24.4335	0	223554	184724	5.67207e+06	1.3365e+06	1.0749e+06	467918	671006	400096	261041	1.08963e+06	91696.4	203110	1.91664e+06	731580	585653	135499	0	523274	2.17342e+06	0	52463.4	136857	5.19674e+06	1.11484e+06	590153	679955	527921	386404	626830
831.57052413514/24.4934166666667	6372.67	0	1.38815e+06	11747.5	3.22307e+06	159552	1.37922e+06	1.94343e+06	896594	845610	111356	50743.6	347437	4.59001e+06	817631	1.03776e+06	240377	0	17554.6	95022.9	0	0	890626	10081.9	2.77325e+06	1.15421e+06	1.56791e+06	1.23851e+06	979830	1.24466e+06
348.070928438692/3.38283333333333	1.44419e+06	1.47209e+06	1.36026e+06	1.91404e+06	1.01145e+06	1.80198e+06	1.43686e+06	1.03746e+06	1.34779e+06	1.1561e+06	1.34696e+06	662057	1.12649e+06	2.06481e+06	755704	1.09963e+06	1.25693e+06	1.89071e+06	1.83513e+06	1.81884e+06	445323	1.16047e+06	1.71322e+06	1.31107e+06	1.83894e+06	980510	1.13675e+06	1.35405e+06	1.30583e+06	1.64885e+06
536.372616301846/17.8873333333333	1.22342e+06	1.06137e+06	2.22034e+06	1.20016e+06	460755	583973	649476	1.16461e+06	884176	577312	151638	215552	1.01842e+06	153698	231119	368213	787912	260257	257472	169845	1.38276e+06	897091	590785	1.02245e+06	972608	751209	391724	376159	476208	342509
409.307359754001/17.0348333333333	236631	204137	253893	256761	610524	189939	212408	200278	112031	189098	1.33424e+06	1.66887e+06	1.55711e+06	1.81692e+06	1.53883e+06	1.12641e+06	512484	1.25994e+06	1.08203e+06	1.28115e+06	111153	106809	113942	99348.1	55817.5	107060	111019	109757	106339	63289.7
703.576064373962/18.371	0	0	4.91127e+06	3.07659e+06	2.95554e+06	1.13614e+06	715733	1.07714e+06	474053	474548	1.79967e+06	436820	419554	0	1.23248e+06	518892	366771	0	1.1745e+06	5.07484e+06	0	0	6.03816e+06	3.70523e+06	1.11007e+06	527582	548074	597819	422071	675479
808.584044087373/21.339	0	0	0	946037	1.12208e+06	1.26344e+06	1.94035e+06	1.75655e+06	1.16535e+06	2.54934e+06	471087	3.77005e+06	1.66196e+06	598387	2.69094e+06	3.34834e+06	2.99142e+06	0	0	591257	0	0	0	504996	1.7065e+06	1.35029e+06	2.07355e+06	1.66314e+06	2.00071e+06	1.26336e+06
280.263978684668/12.7116666666667	592729	673398	593093	812791	408599	580538	740538	324506	613242	297513	262247	556896	27896.8	289819	252924	639590	503545	176185	377235	290517	839544	106553	706821	708586	761705	584176	638279	677086	600916	626795
397.481217136192/8.101	276257	405202	361845	386475	410181	270337	322894	385881	231682	443274	441871	348788	299464	358689	412642	396258	236603	347473	355927	705264	449219	433136	404940	611942	338433	780230	496491	617777	484744	355478
764.523785512814/24.5605	0	10541	749677	375527	1.16553e+06	1.10092e+06	1.19653e+06	1.4743e+06	906997	1.14986e+06	1.49955e+06	846357	939760	88709.2	1.36555e+06	1.18016e+06	935302	0	0	271856	0	0	1.59991e+06	466004	966498	857704	1.13064e+06	1.04008e+06	784411	998580
949.626755327303/16.06025	330417	257956	1.68525e+06	509052	392831	190806	201321	1.67614e+06	220017	518797	475929	233969	1.3771e+06	678289	246240	287068	300458	362943	235632	353734	415696	266352	218479	224415	267238	251648	224318	207177	177652	241523
119.0892907556/1.84525	560718	529617	645784	564798	597144	568275	519355	624257	488592	577034	565988	672248	535502	661307	580062	610665	550904	722193	579148	562875	400923	419244	468079	367315	334983	320521	343189	394365	372122	315763
388.109689928108/2.9655	1.49323e+06	1.95882e+06	527422	2.18234e+06	1.9766e+06	2.5998e+06	1.78426e+06	247521	2.39913e+06	1.94914e+06	47231.2	702571	1.22853e+06	42014.5	2.07342e+06	2.14018e+06	2.2413e+06	1.12064e+06	3.44903e+06	157468	1.17521e+06	1.55077e+06	1.25191e+06	1.24161e+06	1.65177e+06	1.23647e+06	1.13557e+06	1.91577e+06	656082	749157
133.032498869381/2.12116666666667	525446	560489	568725	566122	569924	601452	471252	626244	505056	659381	809832	1.1e+06	626564	866971	702530	925381	1.47332e+06	598066	609685	596022	502586	440770	554529	479376	178020	362675	483245	422650	355485	337653
312.130961703456/5.21616666666667	510711	410765	480785	672347	699512	448077	359525	809406	321614	465879	495818	744189	846405	550775	900047	573968	335672	460562	732554	526210	279026	337739	341631	295684	321332	381867	374381	372991	200157	302526
526.315236319354/19.7668333333333	2.80599e+06	2.20801e+06	4.79192e+06	1.84252e+06	1.60355e+06	1.04845e+06	915406	3.40647e+06	192801	1.34688e+06	1.50775e+06	1.5442e+06	453132	2.1923e+06	1.72443e+06	1.20185e+06	862786	3.00046e+06	3.1964e+06	39886.7	0	0	0	5098.15	1.0455e+06	1.26859e+06	1.31072e+06	1.52506e+06	921461	1.19533e+06
518.323408560917/16.1345	1.43794e+06	1.43942e+06	836066	906421	1.59869e+06	1.39365e+06	1.51988e+06	1.36226e+06	1.46907e+06	1.35482e+06	1.28388e+06	999704	1.3057e+06	1.29692e+06	1.27011e+06	1.0905e+06	1.19234e+06	1.33336e+06	1.13256e+06	1.06726e+06	1.42639e+06	1.2482e+06	1.2511e+06	1.24192e+06	1.25914e+06	1.3589e+06	1.39493e+06	1.46741e+06	1.43388e+06	1.50799e+06
786.601219938895/21.014	0	0	0	0	44850.6	145918	3.21658e+06	715692	5.29354e+06	7.90535e+06	0	7.4966e+06	951148	600056	261579	908615	1.69882e+06	0	0	0	0	0	0	0	87191.5	354106	631034	1.36892e+06	2.89974e+06	2.10234e+06
298.115280623607/4.73308333333333	585616	532832	698294	855909	903794	578961	482857	891162	426326	549032	621400	939946	993621	716843	1.05506e+06	639158	419504	636899	920281	883119	377997	448444	477712	446020	449527	507789	467945	482944	315422	450526
365.106600849845/1.2285	911184	805966	19066.4	53890.5	142318	536785	464219	81037.1	1.03598e+06	634522	0	14993.4	15862	0	20402.8	399299	601097	59399.5	38664.2	26951.9	923246	1.06494e+06	908177	1.08436e+06	1.01104e+06	1.19414e+06	929167	786268	912925	1.20008e+06
728.353053496883/13.76975	320856	376429	554840	838309	793735	779242	963830	811820	716727	780525	611314	531251	706549	477866	511403	509036	636496	213775	519087	579055	163324	125990	242042	322219	510004	398645	394334	459338	550415	776529
546.354588324431/18.06375	889313	996432	1.00515e+06	1.05527e+06	781737	707572	508010	821527	566463	777082	503102	434162	901692	464001	567049	553083	652420	570426	776967	434540	1.20355e+06	1.24567e+06	1.04994e+06	1.05485e+06	931863	875558	671283	671111	703021	726875
705.582959616494/24.5410833333333	0	0	2.28359e+06	328251	1.36037e+06	1.57453e+06	1.19011e+06	1.48383e+06	1.18178e+06	1.26854e+06	51063.8	982382	785391	1.94893e+06	1.33505e+06	993885	919196	0	127450	1.07739e+06	0	0	1.40792e+06	1.27223e+06	1.27032e+06	1.32999e+06	1.1886e+06	1.22614e+06	1.311e+06	1.38473e+06
569.314768104661/7.36691666666667	88452.9	948880	704320	31948	596662	54814.5	77879.2	926201	56706.8	1.01083e+06	862665	62024.4	43135.5	912259	777832	29921	26077.7	139888	617620	123151	68344.4	685247	40465.4	974474	64666.7	1.6809e+06	72909	1.63977e+06	751770	162300
283.282953121467/21.372	529886	584187	807607	821319	0	561966	208551	379351	165931	401043	515923	10736.6	1.31339e+06	0	252568	275739	245052	1.46785e+06	753893	0	1.42691e+06	727292	501293	0	475108	411755	444793	1.321e+06	677427	288216
805.555905220683/22.7963333333333	0	0	495397	599501	1.22821e+06	357934	781994	2.68938e+06	2.5928e+06	972111	286901	177113	1.76223e+06	1.40731e+06	3.25438e+06	485912	698909	0	109072	642310	0	0	220190	892784	794716	1.0487e+06	1.16838e+06	1.17724e+06	3.27742e+06	1.11385e+06
412.286003040832/10.8423333333333	710558	338726	306981	578573	1.16397e+06	537563	385276	683227	446129	1.00873e+06	502873	792011	647083	496765	824462	656488	553584	508247	805593	471528	315658	507210	356017	350277	512320	1.07278e+06	597125	872711	269865	239646
954.611759558759/10.8453333333333	906190	526588	446416	832361	1.35569e+06	667854	682698	825931	626819	1.25951e+06	546322	727828	625222	591187	743609	611302	516380	597403	774952	524394	584151	770990	617229	551658	746216	1.21939e+06	841922	1.12128e+06	449005	402088
579.294564562733/15.8698333333333	18802.2	337744	0	450292	799562	201057	376684	60878.4	389070	4997.08	1.17863e+06	711348	1.4539e+06	688230	1.80851e+06	903003	1.7225e+06	319015	2.10754e+06	1.18668e+06	0	118001	0	588969	791844	29773.3	89318.5	178355	575763	537331
804.553106098204/21.0066666666667	0	0	32966.1	725287	7.97521e+06	480877	303903	2.05499e+06	2.01874e+06	445550	160982	88895.4	458774	548640	394302	244724	296255	0	63207.6	2.04408e+06	0	0	78930.6	294415	442167	343543	365518	4.21437e+06	3.10884e+06	347611
299.277847549938/12.711	547725	636045	555751	759431	380266	531153	692543	302263	566662	272031	234899	488695	418866	256881	219518	560114	446409	164260	346925	254437	810838	100085	674178	675323	696793	512302	576005	602531	540837	565733
465.28749054289/11.0585	610284	1.59343e+06	947282	1.46983e+06	1.5301e+06	2.04655e+06	1.4523e+06	546832	1.27559e+06	248785	67109.4	311163	194037	64727.9	208297	244375	307126	99490.6	53863.5	19788.2	995906	491779	386220	280011	695460	2.75564e+06	997721	1.38532e+06	300073	951845
303.232348041702/20.1556666666667	650323	462418	1.01409e+06	534693	90971.4	183585	309190	450096	281934	349369	1.08928e+06	1.19479e+06	1.20584e+06	1.64087e+06	590467	521632	373590	600639	421398	666252	724387	376793	471439	456037	440195	369551	287543	271422	362704	250755
211.20556836442/20.6228333333333	1.14837e+06	889962	1.09745e+06	689784	817807	539877	491425	1.06156e+06	528174	965619	360915	228548	322578	395266	144682	168673	231663	521682	249166	347175	967666	1.49421e+06	660423	922486	683720	802404	469988	586840	720401	509393
247.128945706875/4.66816666666667	489202	581015	590824	467425	567100	482875	371340	553135	468201	501059	612147	822100	499982	684045	615647	591583	486087	1.25193e+06	741839	1.01247e+06	394958	327452	444573	423625	309540	405174	422544	385935	454887	457472
760.583819227973/18.3689166666667	0	0	0	0	0	249099	4.38568e+06	284642	3.11021e+06	3.87516e+06	719820	3.26239e+06	1.47362e+06	1.26382e+06	309118	1.43755e+06	2.48056e+06	0	0	0	0	0	0	0	72304.5	3.60071e+06	4.14993e+06	3.45542e+06	3.45103e+06	4.17295e+06
829.555437777716/20.6388333333333	0	0	0	4.44768e+06	1.41132e+06	552951	179762	452251	182931	197835	4.56306e+06	418692	340392	452134	566064	557498	232894	0	34669.2	7.15684e+06	0	0	0	4.67217e+06	1.49275e+06	363534	263709	183910	243144	230810
276.14450349068/3.8425	961335	1.19952e+06	1.17129e+06	568209	578431	844034	859412	1.55451e+06	1.34038e+06	1.38679e+06	392659	697640	776516	499518	1.90146e+06	1.41869e+06	1.44375e+06	643750	661692	499011	1.77006e+06	3.19377e+06	1.90418e+06	2.56044e+06	2.48297e+06	1.8781e+06	1.63887e+06	1.23642e+06	1.63455e+06	1.02456e+06
283.26357904525/18.8070833333333	926880	200562	297137	350302	263693	176315	233231	1.46002e+06	304747	1.15361e+06	660008	468839	401686	952338	824464	385078	381725	1.11407e+06	660468	826848	424124	849688	363498	307282	385883	375040	200037	257661	268887	168016
806.562743403533/22.093	0	0	126332	797971	852022	1.83956e+06	1.33194e+06	1.71619e+06	1.19431e+06	1.58727e+06	453038	998556	953116	807029	1.05797e+06	613861	742911	0	118247	268310	0	0	78452.7	1.25869e+06	1.0994e+06	1.15359e+06	1.0855e+06	1.23904e+06	1.04422e+06	1.19497e+06
307.083850981157/2.43633333333333	2.96124e+06	1.6831e+06	3.25615e+06	3.19599e+06	3.18398e+06	3.97316e+06	1.85771e+06	137343	3.9924e+06	3.23863e+06	74066.4	346199	517533	0	1.67423e+06	681637	876135	862700	1.45528e+06	6027.55	1.20616e+06	995397	741224	818150	1.00873e+06	402853	628441	158146	1.33811e+06	81294.4
780.552258186486/22.66675	0	0	800099	0	1.38523e+06	1.23447e+06	1.07609e+06	1.46107e+06	920588	1.07342e+06	542590	584644	3.10627e+06	1.2568e+06	188835	4.16253e+06	5.17663e+06	0	258657	697534	0	0	458757	0	1.24494e+06	1.09693e+06	1.18597e+06	489431	1.7242e+06	1.13858e+06
460.289420397416/20.2755	277677	374534	521221	80938.4	619892	170203	166622	235219	116262	201580	633732	1.449e+06	564522	1.43041e+06	1.54839e+06	805209	439013	990759	995175	973924	169174	157296	215473	85618.4	44672.3	61675.5	59526.2	89634.8	77765.5	45335.4
294.156495063878/4.30033333333333	6.13016e+06	201060	28464	82965.3	38194.5	177929	4.3656e+06	3.82029e+06	316729	1.75499e+06	2.58521e+06	52590.4	161577	106640	3.76507e+06	5.05786e+06	6.27387e+06	59773.3	161313	37219.7	274452	343481	223907	167490	201027	194217	251769	690953	168137	135493
250.128665442796/1.832	528428	449049	313279	345493	627114	625442	472075	315844	633799	497231	227445	217531	331899	232728	202742	266264	425751	192599	231654	231027	527108	574619	441784	697431	642226	632934	396721	523786	474361	338088
592.338658921188/16.4525833333333	1.09826e+06	1.03893e+06	689992	778774	898968	869443	910161	903609	731566	1.07796e+06	322440	288273	357735	358961	367554	436090	396988	528035	394580	407804	829971	1.08048e+06	887475	763652	712614	967456	676126	958445	868683	551132
432.309963823004/10.8615	384954	408356	167915	398884	551458	267569	233563	265671	210578	459035	356922	344053	184568	122477	222081	180593	552707	271102	193419	127461	176763	296922	640125	376685	1.08871e+06	3.45927e+06	505054	3.02763e+06	369552	230628
666.352171626617/14.709	889698	1.1425e+06	698373	1.12168e+06	863441	1.01856e+06	1.23884e+06	754471	1.20549e+06	1.01744e+06	406516	541551	845564	312999	698335	910376	1.23562e+06	504918	474746	538701	818375	777572	720143	1.35396e+06	1.51473e+06	1.37793e+06	725360	840771	1.04036e+06	671076
523.559175177561/16.737	740773	777832	1.01604e+06	844773	490085	597005	614143	691973	676434	537035	149044	0	657451	0	77301.8	302735	606788	226160	69301.3	155998	754182	749386	454990	763248	686513	739724	451166	487916	587559	325189
850.39908578317/14.07375	1.09761e+06	653271	0	69008.1	151864	312703	178560	41212.3	835419	929002	87751.7	88434.3	301917	0	106494	1.74042e+06	2.59255e+06	150058	55848.6	97023.1	1.51207e+06	1.45547e+06	969357	1.42202e+06	2.21205e+06	3.01806e+06	1.33846e+06	1.3819e+06	2.00433e+06	956193
165.054454711316/1.93833333333333	1.47204e+06	1.32144e+06	1.29316e+06	1.1514e+06	1.11533e+06	1.34615e+06	1.27615e+06	1.41836e+06	1.06085e+06	1.38415e+06	897674	995921	863372	932541	869716	1.69308e+06	1.18426e+06	2.19763e+06	1.22764e+06	1.05591e+06	1.08969e+06	1.11055e+06	1.00894e+06	890520	664259	928910	953203	1.08945e+06	796702	726872
318.300959427216/13.186	626492	682654	559106	704191	360407	487476	616052	285366	534966	381750	154030	543263	404578	230645	360565	626014	438987	131641	311586	205083	889762	476147	613644	501261	486830	642994	496409	539552	599215	537595
456.208923725281/4.10258333333333	1.54832e+06	592545	0	0	5196.2	340599	97417	0	1.55069e+06	1.76389e+06	0	0	0	0	0	771185	1.82981e+06	21764	0	0	4.47448e+06	3.70383e+06	3.19649e+06	3.17354e+06	2.55528e+06	5.06224e+06	6.8143e+06	3.37568e+06	3.67536e+06	1.87141e+06
151.061161069008/1.38716666666667	726895	665793	802864	633539	685169	654409	599358	754260	570427	780003	696181	741112	588611	766303	622219	662881	619788	840085	560971	688712	601612	567771	599653	490066	440730	453567	481374	526601	488686	407695
549.376050961133/17.338	483313	457160	774517	570522	161009	345535	280344	311774	389113	223955	256581	509831	1.32849e+06	298556	472820	1.18122e+06	2.33435e+06	477355	538039	472124	984749	535679	352347	677485	614623	335500	259275	285488	403185	302133
348.287863881261/20.488	1.65997e+06	1.37973e+06	3.30136e+06	197693	118519	216505	73426.9	624513	206474	285276	194373	59969.4	412627	249871	343634	80011.9	90113.1	38767	396903	0	1.95398e+06	983601	963681	94863.5	194010	275103	169521	148623	182509	98490.3
379.285253814011/20.2465833333333	785656	651013	178566	830779	580730	336809	443286	388158	314286	378390	260075	147324	359190	256765	390393	231903	177828	673842	497257	363368	646006	618702	744168	555075	479865	441346	365106	479710	573529	449390
301.141519003817/18.221	1.05812e+06	827179	634749	503712	538818	446814	432456	755851	444310	533814	490201	381518	292132	408926	427553	375861	271975	849163	622370	242351	1.06925e+06	1.2889e+06	748457	806895	770355	996650	646683	657239	635880	577875
504.300366246423/15.3244166666667	517706	541784	721052	675418	431020	494336	574377	477630	589802	610941	233567	336816	270989	303657	327401	253212	181414	235114	368064	298225	576442	453344	625599	620781	590138	505197	536723	490529	515739	678375
280.263865156063/19.7876666666667	288512	278112	530575	500059	410451	246133	172798	296535	139861	229449	761638	607828	1.27015e+06	608802	862370	501703	367186	916580	858603	658822	461566	239406	218149	190922	205563	220744	269726	812235	378575	184983
483.328988051963/15.03125	567227	499127	1.40791e+06	867591	529699	374045	461445	841182	519824	562363	227285	314208	1.20743e+06	333394	324364	320855	444491	417765	469980	267785	397185	312457	612211	463863	628828	474007	397842	416222	493051	581398
468.312705789078/18.988	345007	421698	691724	499055	604910	252297	273770	383234	168468	297798	212835	675042	515239	826734	1.03383e+06	572917	316290	486758	596867	146348	326822	155338	224309	119460	88790.3	96956.4	126757	132814	106158	117504
482.294962917056/11.4161666666667	624346	758595	265848	536078	584072	381872	702688	2.38413e+06	629224	365211	694570	440350	251690	1.81314e+06	340970	340908	590028	1.14064e+06	596522	768403	572556	596753	261002	0	334054	950650	493366	784630	105022	219661
280.119040057184/5.09858333333333	930122	725045	423522	544911	992222	935441	734666	511676	958959	806816	343591	379772	531288	413308	334152	536583	823937	324104	401260	397314	889668	895243	750808	1.07857e+06	1.00097e+06	943469	717305	856101	825616	534258
781.556368313162/22.1345	0	0	601993	40877.9	781306	1.88425e+06	836409	1.88367e+06	760944	1.38881e+06	918273	774117	1.68067e+06	1.9971e+06	411442	1.09912e+06	1.36435e+06	0	237445	412805	0	0	414726	0	482138	1.18779e+06	726993	738884	906462	620276
531.328763458112/16.9219166666667	902823	466689	742123	698309	496697	331522	474441	839070	409951	795333	253063	313604	539877	339153	297860	365320	355407	383144	301983	446389	567376	497859	389966	392807	452992	385477	291152	327867	423778	300259
344.280416410945/18.8956666666667	564268	409391	565552	552585	836604	329660	361054	511811	269120	626495	551268	1.01468e+06	737967	648384	1.19008e+06	708784	466519	612086	761638	597956	221340	227512	279934	249590	156902	187721	157685	171464	168700	129705
572.300694408218/16.9581666666667	542764	385882	288560	605638	859786	645226	620709	1.34941e+06	548185	1.3018e+06	185573	187240	74412	228885	164668	129328	35049.3	238454	266599	380002	669390	1.39202e+06	913300	368143	353679	554196	0	1.11848e+06	235199	601356
768.558549203338/22.2863333333333	0	0	0	802717	3.00105e+06	1.14712e+06	671854	1.38416e+06	3.01781e+06	2.60112e+06	649239	1.81886e+06	2.79235e+06	370659	1.78064e+06	1.89578e+06	2.17619e+06	0	0	12513.2	0	0	0	435654	1.71436e+06	1.44641e+06	4.54104e+06	2.17481e+06	2.92297e+06	2.9085e+06
168.091668336757/4.75	1.23172e+06	1.08805e+06	1.28441e+06	1.0335e+06	1.1104e+06	1.11623e+06	990138	1.18994e+06	972886	1.25328e+06	1.16913e+06	1.44407e+06	1.03831e+06	1.48032e+06	1.15971e+06	1.36754e+06	1.27104e+06	1.27604e+06	940061	1.09568e+06	1.0097e+06	953066	1.11096e+06	888737	766039	787737	875510	890011	855368	731624
308.092149311161/1.56616666666667	247015	1.64023e+06	330905	2.32804e+06	630656	1.73165e+06	1.18686e+06	26703.5	1.94822e+06	123505	21804	258095	597165	0	560450	604272	837748	91313.4	412486	11433.9	2.2152e+06	645362	2.22352e+06	2.47742e+06	3.2471e+06	1.54553e+06	2.67476e+06	1.09115e+06	2.0872e+06	3.2461e+06
566.323116432409/15.1356666666667	665822	771597	584246	665060	458170	693749	638043	442163	620146	469556	379192	288518	417668	313700	347184	339702	498425	459754	526248	280236	916703	842968	775108	827967	844773	771050	712036	760348	711722	676773
377.26715405144/20.472	2.08562e+06	673231	369457	346644	121661	68199	134258	738768	90602.7	267557	545866	112548	517224	505252	328066	116775	88288.3	3.17655e+06	922826	8721.71	599259	987846	647332	323671	168482	167862	130191	199717	231600	154660
934.635974934897/10.8461666666667	561026	107898	83860.7	290337	1.18609e+06	264022	143044	395960	189465	982124	236364	576734	409004	206394	614522	380902	289542	265980	646418	205258	112623	244689	126910	113269	234548	1.03896e+06	313808	668932	70771.6	61837.5
804.552143607683/22.9965	0	25392.8	443881	1.09324e+06	663748	613605	855429	1.15923e+06	1.73127e+06	334794	553828	266565	1.07249e+06	1.08509e+06	1.81633e+06	1.07463e+06	151822	0	146655	1.22291e+06	0	31606.2	411750	1.89039e+06	720206	1.9562e+06	2.43553e+06	935328	1.39309e+06	2.34675e+06
144.080591571478/5.766	733632	618288	707511	518593	585354	648631	525073	692890	561793	800303	686381	877700	488025	919141	666093	916894	822533	784177	471206	611218	597560	589806	676115	507627	417876	451998	497845	562760	516161	414589
146.117639490553/1.248	187539	368194	331218	562476	266135	304225	362391	375543	352369	150552	191917	555308	529705	293698	322091	447252	505497	376541	594880	211480	238252	178996	229249	424888	341134	246112	303590	167686	291079	229955
499.292724676698/9.87666666666667	788945	964723	568226	778809	1.79171e+06	1.16654e+06	801942	941825	956106	576419	132334	535388	457895	166265	497205	317824	283030	209916	300776	69577.3	815483	369842	210199	16152.2	434919	1.3631e+06	657163	543173	38214.3	323689
832.58165376963/24.4396666666667	0	0	439199	240647	985136	768865	1.20124e+06	2.02759e+06	1.04757e+06	884025	142649	1.40548e+06	1.0778e+06	1.38448e+06	506306	407787	1.33978e+06	0	0	115588	0	0	522900	326552	844248	1.5738e+06	402629	1.40999e+06	1.08638e+06	1.44014e+06
391.208699283675/5.65266666666667	1.81899e+06	1.05824e+06	367099	515962	930790	645910	685731	617794	673812	1.09274e+06	1.02955e+06	1.55257e+06	702250	950313	529376	2.04934e+06	1.35696e+06	1.56017e+06	557816	1.92846e+06	1.8287e+06	611901	1.57537e+06	267349	420432	365340	316921	556403	337551	173603
460.328205709226/12.1035	800079	934719	235014	690912	612188	894452	1.04918e+06	374666	1.00053e+06	437797	238327	592399	346281	211296	469524	1.1542e+06	1.08425e+06	250424	447663	355042	818809	604090	925414	1.06507e+06	1.29653e+06	929626	999447	932716	815982	721075
349.14058182356/5.633	793341	666605	397492	502989	853698	757700	649799	792356	660240	1.01316e+06	859771	1.16677e+06	573971	927819	977442	1.85328e+06	1.44495e+06	1.28786e+06	689820	811113	413596	537121	587957	538562	485013	476108	413093	569381	495050	286614
778.537606289653/21.054	0	0	59331.4	5.79292e+06	284710	1.04396e+06	613695	3.54227e+06	308713	733960	1.99926e+06	1.54421e+06	1.33656e+06	300562	1.37909e+06	738063	862257	0	43394.3	2.0559e+06	0	0	28462.7	3.31046e+06	1.52992e+06	881845	589096	373149	380571	384171
398.306317415505/8.11425	317069	423913	420142	438205	446862	330923	363223	403231	301198	448239	420514	367003	335405	385897	430607	417557	309485	368590	361404	622795	468128	419514	401585	570724	363958	675920	468654	565433	465053	385438
833.590136690134/20.9976666666667	0	0	16073.7	80280.5	1.74031e+06	454715	333579	509272	747065	484542	5.63566e+06	1.84059e+06	1.07297e+06	2.9629e+06	2.66294e+06	1.87668e+06	1.28219e+06	0	34804.3	1.94062e+06	0	0	0	54623.6	880586	582683	404267	587315	2.16518e+06	306443
756.555324839004/21.683	0	0	0	943006	1.02003e+06	825162	1.81317e+06	1.20557e+06	1.29899e+06	2.20858e+06	855690	1.73164e+06	2.30807e+06	0	4.35135e+06	1.93338e+06	3.8129e+06	0	0	581994	0	0	0	698921	732636	1.04266e+06	1.01733e+06	1.41288e+06	900302	703030
302.296714126583/13.73575	800746	869374	743412	920166	691500	773332	834363	632806	629183	643791	547952	566907	505476	553718	462026	664734	518849	361798	503355	532494	872962	812974	729085	696747	658788	647269	698670	852411	722307	623399
149.023261572347/18.2296666666667	609166	534068	404472	537049	559468	376642	362347	493157	385068	403412	702656	484016	432927	551449	549268	652836	422876	1.10237e+06	657172	736974	607120	653645	507957	543871	621149	526020	526748	522152	632719	699221
305.158228681322/6.03283333333333	68164.1	784529	646234	79666.7	451964	66472.7	92397.6	721779	75698.6	740859	532795	72108.5	56453.6	538555	598528	52342.8	43044.7	105884	536441	145850	89869.3	568482	69326.8	817641	74964.2	1.37112e+06	95580.2	1.33115e+06	585591	144077
185.032604328487/1.15366666666667	306926	341782	292335	295110	301388	338193	293440	277902	289081	308594	240379	234085	248277	231919	195319	196523	227560	249977	225020	220660	370649	290505	318281	277182	306288	283741	325292	300094	306138	281290
130.049875510607/1.7455	564452	632560	758284	632701	671917	643434	692356	738432	533844	645654	608811	862588	797588	803515	783207	670261	905850	1.48889e+06	852283	795172	1.04647e+06	641959	598004	509482	524248	628969	1.06725e+06	695527	607925	512242
783.570324179775/20.6285	0	0	0	110476	1.19887e+06	421535	1.16009e+06	580677	1.5524e+06	1.93313e+06	2.33952e+06	425144	315957	516955	386798	553808	476674	0	0	1.11557e+06	0	0	0	199268	525216	2.04959e+06	1.2724e+06	2.04541e+06	2.33667e+06	1.15176e+06
355.284998788112/20.4628333333333	1.08284e+06	414274	311847	417022	69729.2	251392	256661	904467	175784	448774	49266.9	193406	814363	703976	483299	283924	181279	1.53157e+06	763561	62765.8	335353	521001	504526	364068	300091	305606	260874	387176	422786	302441
808.582594047632/22.9063333333333	0	0	203292	123169	428866	884523	7.49344e+06	3.15073e+06	9.84331e+06	1.54924e+06	358467	1.62001e+06	3.88415e+06	92905	973812	1.09724e+06	1.00757e+06	0	0	1.53976e+06	0	0	259754	600207	1.04192e+06	1.72597e+06	1.42309e+06	1.79834e+06	1.73675e+06	1342119
287.236924919879/21.3458333333333	1.14086e+06	906206	1.27346e+06	0	85336.2	468553	512008	586964	355971	603952	0	126632	661105	0	620435	498761	402256	1.10246e+06	579805	0	1.08366e+06	995087	798403	0	111841	541494	380373	373842	411501	312900
469.313302797879/14.039	541491	516271	1.20539e+06	834987	270065	268637	274710	588502	471127	133089	49101.9	54631.6	544888	55732	56764.1	100421	304629	285139	76001.4	67675	763107	380266	480454	568567	869674	522887	366260	383913	549677	683757
308.170855501365/5.651	1.26496e+06	767651	504698	496297	1.25417e+06	1.08874e+06	923960	1.54183e+06	1.02919e+06	2.56217e+06	1.18998e+06	1.35456e+06	961264	1.1023e+06	863702	1.97831e+06	2.11633e+06	1.20017e+06	642063	986037	427980	487463	335579	350382	340372	408551	337174	396489	328019	142855
756.554152798935/20.5421666666667	0	0	0	1.61617e+06	781469	320289	1.6405e+06	1.58854e+06	1.00445e+06	2.93252e+06	47135.2	4.21839e+06	711235	80055.3	191843	910806	1.03258e+06	0	0	4.50737e+06	0	0	0	435656	235768	826965	949968	1.40166e+06	749220	568619
231.170346907484/5.933	381631	312131	401171	311358	328364	412813	585226	734551	484889	1.07195e+06	1.22677e+06	577501	335321	873380	263295	523165	660825	508957	223428	332291	214628	172960	168129	112892	113914	204182	159246	201985	104791	88755.7
278.123742150965/1.78283333333333	393639	414673	225359	410172	562788	500591	353765	478120	407617	543222	708169	853803	480475	827139	810186	1.20146e+06	991268	1.16147e+06	704355	558774	231782	280542	395943	334965	348641	292261	336156	298612	258756	224229
110.009046848875/1.016	695381	442917	125834	168508	235034	457075	296823	379664	493399	654404	278178	293399	102835	206629	175704	459405	565671	477295	113458	169873	698551	714712	457549	497766	592596	532287	517118	1.45476e+06	602439	475441
464.31496863344/21.1034166666667	772067	1.18726e+06	949260	0	0	105076	55956.6	112584	12655.3	107663	7378.63	83542.5	60946.5	114771	819686	257188	113516	2.35009e+06	1.91888e+06	57202	560016	418575	854557	111666	38316.8	29531.3	36331.9	5304.94	20744.2	18171.4
448.311332065361/12.3925	501454	366790	138449	382174	1.06555e+06	296596	309924	667541	378072	843902	544495	505859	209432	769981	349923	458173	484182	288689	377537	235756	201752	287592	202516	251537	401978	1.46279e+06	292827	1.02754e+06	206555	209723
119.089813862501/1.30075	762730	707403	947990	737548	828222	682811	794149	892795	652854	831460	641875	1.61945e+06	1.01614e+06	710734	621837	637165	528450	838967	648452	623926	488930	544544	610644	504391	495464	737344	483602	646443	644997	486457
793.600150190496/8.34608333333333	242350	272942	250500	267551	323498	226219	302518	310222	263848	297796	409752	314131	264196	373130	330027	457130	225615	343894	314862	568373	285596	350724	305994	479081	246785	394077	365032	230053	317465	263864
766.537830195917/24.469	0	12044.6	105126	145139	1.10382e+06	1.05058e+06	902283	1.70693e+06	1.14545e+06	1.8495e+06	806429	657776	641003	748936	584017	1.21411e+06	511547	0	22814.8	71265.1	0	4991.65	189884	701200	808594	954175	721474	738398	1.01921e+06	571364
810.599591719534/21.0213333333333	0	0	0	67662.3	567549	121551	696560	567033	759058	3.61094e+06	85585.1	1.85332e+06	413930	94977.3	3.5914e+06	3.14035e+06	1.0643e+06	45972.9	0	294061	0	0	0	74794.2	105980	1.26029e+06	1.17257e+06	1.01757e+06	1.34402e+06	696812
189.123244603575/5.25	1.01539e+06	449955	497177	334763	307209	430564	400746	622690	443275	974246	1.42047e+06	511260	242403	1.54939e+06	286437	865440	885276	1.39182e+06	179085	610098	822952	688944	448992	324921	227951	273359	318000	526089	292080	199644
329.324694282406/22.289	1.06346e+06	965634	2.05494e+06	0	0	0	593430	348496	616253	458557	0	0	370031	0	359837	186831	234425	291392	535845	0	1.1504e+06	525753	771796	0	0	506619	293787	304666	538628	272991
617.35040984022/15.4405833333333	834002	285379	862150	592179	1.34756e+06	439407	520850	5.16029e+06	612360	1.70438e+06	1.0406e+06	682777	1.35581e+06	1.72386e+06	900285	1.22612e+06	788430	1.99306e+06	497007	877170	799465	681727	481769	888041	635514	792088	609411	748113	484131	412759
253.141162449684/14.2123333333333	536728	443659	743545	343140	759986	830318	599912	487201	661715	814882	157538	232113	341250	310669	438457	245437	105492	735047	327764	735038	423694	364711	413383	328704	510690	392695	378294	298900	410007	456528
593.334579006567/8.92866666666667	21901.9	763814	497562	119937	810786	37209.4	317041	5450.97	140255	95380.3	46409	766025	716614	0	1.0024e+06	74838.9	834092	0	21777.1	0	38039.7	89538.8	141614	509663	968533	1.13052e+06	1.53065e+06	140158	246441	47777.7
313.114823812263/1.907	673132	697297	167820	309534	545580	684472	486688	404913	916354	688891	451779	499642	385698	329124	550308	923251	1.00714e+06	606833	497689	467857	724938	836015	792826	859102	931878	881102	744214	894879	696312	561813
183.084129734548/2.4295	1.59753e+06	1.43989e+06	1.64922e+06	1.4414e+06	1.48517e+06	1.63026e+06	1.41734e+06	155943	1.42713e+06	1.58142e+06	389225	578568	1.16097e+06	526870	930559	660441	1.1951e+06	1.72929e+06	1.13939e+06	747301	1.28694e+06	1.20594e+06	1.25832e+06	1.043e+06	884204	982770	1.07385e+06	627910	284982	762220
339.345726698702/19.7761666666667	119419	1.28284e+06	448292	2.38337e+06	2.15706e+06	1.53536e+06	2.26996e+06	1.88078e+06	1.14885e+06	561477	2.80475e+06	2.54651e+06	664897	1.57386e+06	1.00729e+06	1.98462e+06	2.1031e+06	37708.8	2.5907e+06	79958.5	90691	2.39357e+06	729517	2.10798e+06	1.52297e+06	1.42876e+06	1.19766e+06	1.54416e+06	3.62278e+06	1.86047e+06
269.226516962957/21.6335	1.47119e+06	2.03758e+06	399800	0	27246.9	0	262093	269652	256198	167867	0	4183.12	202869	5520.66	77507.5	81623.9	1.83894e+06	649477	1.24744e+06	0	2.36328e+06	1.0979e+06	1.19229e+06	0	7224.58	310143	240794	115869	139982	49237.7
162.076201932773/1.27066666666667	696275	73650.8	76475.5	136620	101082	109320	81896.9	1.01999e+06	95070.7	614242	58303.1	49007.9	932412	461932	868410	435084	739314	382495	516227	83630.9	64082	56863.9	57914.8	86370.1	170487	109514	81623.9	84790.4	75888.3	798934
200.146460955517/11.60275	349732	429595	254264	443839	376695	322295	373438	368202	265186	367312	376069	366027	298961	360874	369345	419181	253396	428398	330081	844645	549830	432438	421585	684275	284665	415959	469515	562392	421296	306475
618.26204457324/4.35333333333333	601339	174873	0	0	0	34766	0	0	615367	571062	0	0	0	0	0	247170	619423	0	0	0	3.93369e+06	2.86402e+06	1.97191e+06	2.69737e+06	2.52078e+06	5.45714e+06	4.98571e+06	2.44783e+06	2.60617e+06	2.4887e+06
382.301740233754/23.5558333333333	1.78826e+06	1.54122e+06	2.42322e+06	0	101473	164078	71208.8	123709	64190.5	58197	0	124601	49843.7	324584	68797.2	94146.3	66687.1	1.40766e+06	1.19984e+06	0	1.8248e+06	1.77785e+06	2.48999e+06	0	0	80342.6	96633.3	102435	77368.1	104752
348.238869294793/6.1175	660500	413463	248908	431238	558800	383261	340470	923718	179940	361119	682115	398793	343626	484652	660172	483773	308180	627227	460048	296579	485155	433810	369376	355834	384084	674391	468393	545611	430453	339320
571.358453773461/15.5833333333333	494969	584530	310899	456305	299281	395555	297663	286066	437718	164773	15317.8	23120.5	436909	58486.3	192858	276778	629007	190299	155910	297861	740160	423521	382840	439851	914752	511692	340100	334966	522372	343764
518.323108980204/15.713	538452	574458	858383	719630	591853	515106	465429	700826	309258	440306	524556	414726	758221	552229	455830	396088	472173	521818	478243	377624	609029	540344	526074	503483	534306	536222	570969	569309	583561	691362
104.053392516095/1.38433333333333	591430	537055	654896	523578	558193	533275	532629	616185	474842	646556	572609	622350	493988	640953	519553	566815	523041	673176	455315	564462	454819	441466	472921	384108	355903	370702	400701	435720	407875	338609
464.314937990181/18.3858333333333	557533	550480	974715	708259	527894	426407	436139	826569	409544	516820	520454	476916	869333	604917	472170	464459	483395	519121	437543	458977	660656	602106	572465	588493	624292	572047	512257	489300	518252	540146
310.09109030882/1.87575	84305.6	497657	154679	792475	292678	602944	467445	15522.4	609041	158237	12862.3	117931	288599	0	268296	198444	267037	29539.8	167794	21229.8	667201	206060	641459	675909	791088	464619	696413	325708	529448	780333
337.140279792817/5.83275	603512	479619	397102	493136	795846	643853	526915	419997	527772	565009	287339	408886	352518	345129	374976	513472	618779	284922	287134	330253	471384	486982	504209	621475	526706	498261	368985	447018	435755	279699
589.414282408417/7.63283333333333	346060	479436	434051	331281	490769	324932	334696	487725	311264	524424	407525	332366	276333	396444	409586	312313	255860	340559	372253	461982	371358	434552	346400	519344	338903	544667	371276	553754	479724	390810
407.239212413366/7.19183333333333	414966	427991	137255	372311	551925	576404	914318	635786	891251	984235	1.33554e+06	1.10936e+06	436152	542402	492308	959255	1.31026e+06	832824	518790	666006	62551.2	178418	193510	38613.9	291661	371152	310192	322112	192658	170015
370.278562033874/21.4295833333333	1.20928e+06	592934	6.83249e+06	23184.4	36453.1	44302.4	228486	1.97078e+06	164988	1.16116e+06	328021	82826.4	487732	0	407188	588581	144047	616834	442099	414215	547084	1.15422e+06	637425	316054	9497.21	110018	266031	210512	352895	66558.1
757.558948210419/21.0066666666667	0	0	0	2.37977e+06	1.24104e+06	378513	785951	903747	1.15866e+06	1.64616e+06	1.18528e+06	1.04846e+06	1.16509e+06	15192	2.47785e+06	1.31597e+06	1.49488e+06	0	0	1.48321e+06	0	0	0	890006	956426	449578	590330	465623	308992	324362
567.328911035709/14.57075	387558	464609	358703	414827	482676	374316	320478	258448	145641	246453	306467	206239	569029	209092	294467	452363	617925	278097	217203	358593	291911	480783	268092	316019	516592	476398	205629	374116	449745	195016
884.136835887158/7.401	0	833855	212925	1.05045e+06	992281	1.03957e+06	570875	146092	622003	130448	478663	1.04671e+06	954976	447351	1.09356e+06	1.09962e+06	898339	195669	1.26826e+06	795338	0	128781	713596	406861	456696	0	0	424706	309579	188651
104.107055634863/1.20116666666667	84167.9	317525	718270	533386	650845	390636	532144	689908	288748	408059	431560	532144	501218	589831	525200	91628.1	180180	470151	424600	473632	149154	159425	212517	175807	149812	198862	171273	290840	283020	204899
370.296046744895/19.5566666666667	661931	412848	919788	571741	846489	263445	317993	538241	251842	746041	390290	608576	713769	528487	640856	435023	271429	522493	406075	0	233760	255853	201135	172868	105551	169911	126279	120614	120095	73127.1
375.251625809462/18.9883333333333	667990	631614	599598	572897	526148	433665	441845	501696	417189	492336	534220	559642	587387	582891	629354	576074	490538	776999	751865	627026	772303	698851	617821	600358	582225	478374	461776	419443	431256	419619
416.216138783094/14.2876666666667	413491	314211	342449	353263	344079	379763	321296	357430	425687	165818	397302	463837	82709.4	398220	450563	349329	383216	469292	559363	443357	383357	447554	459908	453993	449820	410862	327667	360329	394570	453077
322.27219388215/19.905	535523	683797	947271	936912	621797	341943	417713	325814	317616	293168	245090	358238	428140	398697	527549	263908	270954	417122	532257	0	697751	525981	567953	621653	398471	262054	182740	178098	247089	167792
613.341613299652/7.50991666666667	58623.1	687729	482165	25520.7	420215	43903.1	44546.1	695322	39087.7	749384	656555	61126.1	32598.1	692772	691939	30749.2	33731.4	83016.3	548110	92742.5	42229.4	436382	28799.4	655575	40939.5	1.0721e+06	47571	1.08419e+06	513211	96492.8
524.36311134367/16.9746666666667	1.08221e+06	118951	1.81105e+06	1.48764e+06	802430	749416	723244	860732	993213	706414	165965	193616	777538	199482	44589.7	271199	513629	378562	220518	211422	1.25539e+06	971162	793112	1.1399e+06	1.21743e+06	989085	748096	672704	719960	685274
480.300530547086/15.2531666666667	338424	340780	720715	679647	264046	249110	277987	319384	369327	139796	274632	467277	1.03078e+06	219763	446405	534610	827196	239136	376615	355982	594978	350173	314828	583429	387816	309369	252517	212781	271724	277398
339.192667923213/4.4995	689726	477588	756928	233411	614022	485579	532082	693862	315804	386667	868887	135053	323100	744886	120994	72248.7	166608	352532	324176	522121	269145	328324	176533	109766	63028	302694	286453	315552	398830	69638.3
436.28363171063/16.0046666666667	486832	375386	964642	544785	421580	272166	291466	921807	308638	533043	505941	353834	806745	642189	332958	347914	376661	471381	324518	410701	543632	406660	358244	371656	398382	393277	337122	331693	332847	346792
362.269707450755/19.03	252449	353245	564513	491774	631794	276244	258805	218927	177516	265434	252603	1.03682e+06	557008	603921	1.026e+06	499325	252275	380999	647272	461456	199951	140116	264274	152499	130010	114306	148728	149628	125390	112059
584.329117314669/24.64	962657	868882	361841	327463	1.33509e+06	916452	745787	595624	1.01446e+06	954317	1.7059e+06	896940	1.20289e+06	1.70479e+06	857439	885485	1.00999e+06	380633	1.57107e+06	1.27193e+06	35401.2	4595.86	441890	1.22489e+06	1.22134e+06	595529	601235	513817	492108	756132
826.399324805208/14.0913333333333	962002	532907	0	66863.8	100732	245248	140519	33879.1	814353	1.0218e+06	0	5126.69	156683	0	61153.6	818932	1.52403e+06	40266	0	21082.9	1.48544e+06	1.0461e+06	830963	1.6921e+06	1.85061e+06	2.51879e+06	1.11553e+06	905762	1.356e+06	764503
659.28898053838/21.55525	1.02009e+06	683574	528606	0	0	122399	97247.8	132268	89176.5	216761	0	0	153450	0	447022	234451	381761	593576	612916	0	1.25335e+06	1.69909e+06	1.12492e+06	0	0	424888	127642	141299	227679	166546
87.1002863768563/2.59866666666667	1.8287e+06	2.571e+06	1.00916e+06	2.37036e+06	2.6036e+06	1.85991e+06	1.55576e+06	2.91014e+06	2.22927e+06	3.19827e+06	1.70136e+06	2.27892e+06	2.50699e+06	2.28764e+06	2.75362e+06	3.49616e+06	3.23964e+06	714568	2.08805e+06	1.73253e+06	2.17829e+06	2.13599e+06	2.42383e+06	1.22927e+06	1.6642e+06	1.76805e+06	1.98483e+06	1.13415e+06	564138	1.63149e+06
424.103719734933/2.09333333333333	132391	703952	154017	1.50036e+06	588576	933480	518954	38212.9	813712	321301	30676.9	286356	705969	17781.9	924065	344616	548860	89739.5	1.53569e+06	58159.4	463006	207648	551705	534722	608232	305912	572343	266725	429202	826981
520.341260382295/15.9676666666667	940948	2.18144e+06	1.06777e+06	1.17246e+06	480625	572665	471216	401918	1.67532e+06	335922	197337	620686	731005	153570	761620	1.11624e+06	1.00538e+06	301569	669867	235706	2.98191e+06	1.76995e+06	515563	1.06441e+06	1.13323e+06	759727	434679	398882	660201	457980
277.147709542686/3.31466666666667	1.46178e+06	1.3804e+06	99503.2	506064	905609	1.25011e+06	901662	654552	2.15033e+06	1.34401e+06	682303	1.2992e+06	705174	533086	709804	2.52242e+06	1.7799e+06	971179	1.48599e+06	192338	1.71598e+06	1.85504e+06	1.73066e+06	2.00917e+06	1.37192e+06	602432	1.90637e+06	2.15279e+06	1.5502e+06	502121
830.564687030523/20.6390833333333	6076.03	0	2.51777e+06	1.34734e+06	1.60439e+06	606576	283403	727499	243914	528117	2.2934e+06	166975	205769	384293	351968	125977	128942	0	968905	4.21788e+06	0	0	878423	1.3817e+06	964026	540904	324092	329518	501621	318631
566.322834213959/15.4738333333333	612805	643452	180582	545886	573707	612322	647301	461192	558515	636918	336765	351290	266792	339790	377498	303380	287280	327779	407879	324200	612615	654119	702929	723713	760289	796871	661481	665528	626901	641530
414.301812339462/10.8715	226997	277131	83872.6	236383	312517	145567	125406	128626	114144	259274	225444	198773	69162.7	39362	78231.9	34879.1	402768	99791.9	55206.3	49941	98394.6	160581	474275	265873	828952	2.66395e+06	358080	2.28749e+06	251526	164839
785.586595844143/21.339	0	0	0	0	855249	1.72696e+06	1.19098e+06	3.04776e+06	1.61431e+06	1.83638e+06	128062	572218	1.04385e+06	1.29942e+06	968218	116844	1.16037e+06	0	0	184527	0	0	0	0	2.80054e+06	1.38357e+06	1.29132e+06	1.69348e+06	1.24247e+06	1.13945e+06
810.600038962158/21.3365	0	0	0	28073.4	170391	189582	702458	899678	698763	1.51027e+06	74408.6	1.6543e+06	754845	431564	4.60922e+06	6.50118e+06	1.83402e+06	32657.1	0	111198	0	0	0	4001.74	192909	1.70633e+06	1.85252e+06	1.60801e+06	1.23585e+06	666030
703.576274802948/15.9781666666667	0	0	16445	3.94409e+06	2.69481e+06	2.3124e+06	677198	1.03903e+06	714588	579027	3.55458e+06	1.0841e+06	1.12804e+06	0	2.12289e+06	1.64053e+06	1.42273e+06	0	75508.2	2.63777e+06	0	0	22822.1	3.11909e+06	2.21849e+06	810887	654576	518046	765633	1.03377e+06
833.589544825179/20.622	0	0	29886	94140.6	1.87983e+06	837236	612868	1.42375e+06	480889	2.19099e+06	339652	892076	1.42798e+06	2.42859e+06	271137	953529	924254	0	5205.28	59273.7	0	0	5344.41	84161.5	258049	1.48809e+06	795594	582567	892601	646321
86.1822197995578/2.66466666666667	1.60153e+06	1.29453e+06	839624	1.21977e+06	1.39475e+06	1.29032e+06	1.20412e+06	1.23949e+06	1.21734e+06	1.36475e+06	906179	1.31695e+06	1.22537e+06	1.23854e+06	1.35824e+06	1.17828e+06	2.35257e+06	1.19922e+06	1.39591e+06	752661	1.13596e+06	1.12202e+06	1.21604e+06	1.26838e+06	660545	683164	1.21831e+06	894892	1.31005e+06	651690
136.075706655548/4.69908333333333	306850	354514	473160	468283	459232	357551	393872	257366	376096	311111	432080	423585	734167	32276.9	387910	225440	36544.7	267662	434030	427032	233012	262283	193185	377346	337455	376011	395328	274878	281706	259556
224.112878646714/1.18016666666667	140772	268858	129422	338192	301153	266564	401701	227206	292578	164672	524743	444775	380922	326620	488997	375988	399754	379475	353276	469734	143212	167665	200722	234937	238112	154934	185813	143862	114734	108320
431.141802864315/4.37533333333333	699556	671849	0	11664.5	92168.7	409805	164856	21223.3	585790	412117	0	0	0	0	0	588724	522080	67647.8	0	0	985042	949960	842889	785741	867444	664862	835730	810656	621008	788352
478.294479917485/15.5774166666667	447764	451447	1.39055e+06	1.14678e+06	283860	299912	393464	462163	602256	276296	32220	413996	861134	155977	394116	461293	654451	188333	385709	228782	902634	393028	403407	631486	650000	397291	342723	257604	366731	363693
481.282328477506/9.869	660935	871774	489896	706532	1.5506e+06	1.0253e+06	745786	758471	841878	465607	93059.5	457519	386051	131156	431114	334181	227098	165506	245785	56564.1	732176	312302	242828	25232	384549	1.26739e+06	589648	473346	47753	311303
528.308022111999/15.4971666666667	369907	406130	463877	637441	317632	301280	339290	236227	517565	158939	260746	380888	510290	270527	383704	262092	354962	234292	378729	452042	801046	345501	487730	500544	824510	333935	350263	292764	480835	434148
394.307693664025/14.0603333333333	333021	268372	427612	421310	473230	213427	240419	272996	197948	441992	426565	772694	699386	548665	857402	586958	399926	406518	485550	457489	158158	130471	157303	185913	122364	163411	162241	150307	154145	98104.8
231.158874324188/14.2095	446926	364151	713724	255184	728017	799403	485710	437244	539047	758372	137894	239651	287075	292401	453808	249424	101825	809421	292780	796494	104616	88273.9	298121	226486	380086	260176	231418	188982	238522	294672
166.058324875699/2.18666666666667	301555	333546	373051	311771	316353	326668	321625	366432	319798	343261	411012	363612	361260	364624	308561	324559	344941	325502	319445	395985	342672	385759	383334	390408	395252	436525	440317	457677	520690	488187
828.552094218071/20.102	0	0	0	2.13573e+06	2.79154e+06	873786	604530	894212	388506	298592	681123	486989	988241	644692	394707	605084	447607	0	36622.4	3.35027e+06	0	0	11109.8	1.3153e+06	426627	704178	530302	224939	305779	476388
829.55599898375/20.3473333333333	0	0	0	1.07432e+06	1.67806e+06	286738	142458	481756	92621.6	176619	635028	799913	1.20581e+06	542976	858103	697933	650292	0	0	3.90392e+06	0	0	0	1.2855e+06	669883	385887	202284	160665	143723	155186
458.270795045903/20.5221666666667	958756	762354	1.29193e+06	0	797651	106707	98962.4	140774	56689.4	133253	112770	160350	181034	459443	510513	142801	94298.4	1.15569e+06	643714	0	383897	328350	395996	100287	0	40316.1	37799.7	39841.6	32311.2	15335.8
167.206854449193/4.74916666666667	736787	642229	795235	578593	653663	656919	541581	706494	548880	759024	722972	664081	621084	664229	707084	651094	813267	816376	519946	686010	619504	556431	698278	510026	434711	437007	496341	530050	504904	404562
139.05020575075/1.992	300928	498351	318775	621214	382915	443721	345035	242685	389281	249804	311839	406648	575409	203815	480615	449775	777852	386947	664870	334717	395082	357237	456886	405223	519324	312354	422746	344266	246247	249295
416.313453674314/21.4695833333333	851348	796768	1.10263e+06	42170.3	111759	31160.7	19852.7	22437.1	0	14196.2	116904	81470.5	336013	0	809211	272071	105249	2.30459e+06	1.66677e+06	0	412787	347910	333147	56414.2	0	0	0	0	0	0
680.516357548299/8.167	234056	285350	264970	265954	231528	143227	283483	329656	111487	318744	422196	297520	264696	380865	353263	273210	205225	349827	326440	606428	208726	374501	316613	570593	252882	486211	381731	431023	359485	197879
855.57261270762/21.0353333333333	0	0	5075.43	2.42313e+06	1.33582e+06	2.92119e+06	443072	766534	443618	470408	369904	394312	1.45561e+06	1.21049e+06	753805	1.37298e+06	1.04668e+06	0	33851.7	995597	0	0	5357.6	1.01658e+06	1.28876e+06	536574	2.23686e+06	423501	1.4128e+06	389370
512.363155728462/17.255	439003	462857	758232	618058	340737	343062	345226	388818	351615	305583	214461	267336	1.11824e+06	292435	318934	357155	572314	273148	397620	223666	459773	362605	463128	518162	616924	458689	310486	297014	348881	373370
785.588364294382/21.0023333333333	0	0	0	0	385094	1.51055e+06	490834	2.6588e+06	2.39396e+06	2.49509e+06	148979	1.0706e+06	541519	2.20267e+06	637619	76366.6	674763	0	0	78280.8	0	0	0	0	1.01111e+06	1.2015e+06	862621	1.47926e+06	741648	527626
778.537549013459/20.6455	0	0	53375.6	678836	5.16346e+06	191712	944566	1.79012e+06	1.03534e+06	1.52654e+06	151655	987383	487129	257175	879609	429704	498389	0	95704	2.74539e+06	0	0	16988.6	333014	111187	826550	630207	1.08243e+06	759628	796937
754.53740808904/24.3805833333333	0	210331	210018	447406	2.48397e+06	1.74703e+06	267280	1.08075e+06	581274	103554	818448	399033	43137.7	1.3235e+06	297599	85671.2	68178.1	0	76157.9	636351	0	93542.1	1.09204e+06	329320	1.8225e+06	697720	189274	802330	422856	706556
147.044252480711/2.1695	309727	316565	348818	291750	295861	305720	334977	482000	298137	324372	389951	391367	358905	568381	312087	321762	352960	318464	307047	375270	322107	360714	373712	378882	386622	417538	438310	442573	523652	483476
778.538377830977/24.50625	0	589638	5.67798e+06	0	435874	583444	218877	332233	181379	188856	0	67863.9	37752.3	53772.5	230777	137869	104403	0	91448.4	0	0	414562	6.07149e+06	0	333280	179331	167219	45328.2	246020	188340
368.280443133123/17.9971666666667	153649	112287	170157	177157	365360	104946	122341	141659	70346.3	116341	706751	1.16398e+06	643817	953595	1.05445e+06	667097	336295	681929	541002	691919	55593.9	57591.2	69903.9	48943.6	21669.8	32859.9	43851.9	42231.7	42320.1	21654.8
543.133428863918/1.41266666666667	416157	299910	0	0	0	104580	0	0	493466	443504	0	0	0	0	0	203372	427107	0	0	0	695100	610292	670579	2.01298e+06	2.19492e+06	707719	792855	2.05095e+06	2.02408e+06	795237
442.19316337578/1.865	684582	314599	0	0	44825	225185	57991.6	5678.02	502148	761674	0	0	0	0	0	694665	903399	47253.6	0	0	676189	770974	596578	642596	545080	809112	640940	718064	562674	396241
595.350150466256/12.984	5509.25	1.06396e+06	515017	134983	1.20258e+06	70616.1	392040	5421.99	111117	63959.4	15551.1	411478	298918	0	385932	36355.4	373937	0	5217.78	0	7043.49	45961.1	180519	748049	1.11013e+06	1.18406e+06	1.29674e+06	69517.3	310316	53609.3
147.076448002215/1.33716666666667	781147	1.25313e+06	1.39498e+06	733467	699144	1.32264e+06	1.0176e+06	1.21474e+06	937864	743523	528648	1.03854e+06	611925	824635	416044	541468	387277	1.09001e+06	506058	1.09624e+06	1.13193e+06	1.14821e+06	1.18301e+06	804136	775668	959640	842956	951846	1.10642e+06	766454
785.582706857124/21.656	0	0	0	0	644278	1.21323e+06	1.42827e+06	1.81873e+06	1.57257e+06	2.15764e+06	361196	560865	1.05968e+06	1.03417e+06	786837	482450	1.33663e+06	0	0	282265	0	0	0	57002.2	1.72474e+06	1.77449e+06	1.41218e+06	1.89137e+06	1.56601e+06	1.2031e+06
830.568151017805/22.9341666666667	0	0	409157	156204	1.10847e+06	2.86557e+06	739537	1.57444e+06	1.12805e+06	1.27364e+06	90089.9	1.16369e+06	2.56943e+06	121193	2.06434e+06	857420	1.85686e+06	0	50326	397069	0	0	471832	635528	1.53277e+06	1.06432e+06	925284	2.31664e+06	2.45212e+06	1.25526e+06
330.145801310186/4.91633333333333	729855	886009	324700	405226	805522	733465	803719	694820	802413	805829	618796	767292	825275	558291	844608	1.17099e+06	1.13932e+06	846477	654087	635245	604352	706893	660308	749014	743818	658260	514846	678470	649935	397077
303.30918001/14.188	443367	373307	411341	315253	385763	249700	306145	486529	174037	471160	626036	322989	363200	447618	300824	302263	165152	341082	352832	484935	340983	310987	257991	172584	224260	290682	308815	331559	208738	188365
206.100214652725/6.00016666666667	319106	255667	424828	279914	281379	301443	221864	291937	228900	335885	357656	407826	189808	433063	345844	511940	368991	389872	176160	261202	361263	256555	306635	243265	167710	169813	251781	208013	206612	94937.1
833.589451267734/21.339	0	0	0	772579	109778	386678	547462	2.78251e+06	229734	1.36425e+06	467940	804004	1.04526e+06	535083	6.37326e+06	1.91676e+06	914378	0	36510.5	1.12501e+06	0	0	0	380449	1.52184e+06	1.26305e+06	1.10967e+06	202081	392266	574872
810.599900924362/20.622	0	0	0	27423.6	340613	135060	627790	447889	940189	2.90886e+06	156971	813071	310410	99480.6	2.29672e+06	1.675e+06	718157	0	0	954788	0	0	0	49476.9	139946	1.74589e+06	1.229e+06	1.48904e+06	1.77369e+06	931204
552.403664170862/21.0983333333333	252063	593670	1.17897e+06	681311	476572	294535	220169	243230	252320	299088	0	307245	1.70124e+06	0	334176	390483	636739	157517	485979	0	563845	520056	502527	709465	638149	631990	286596	183623	312341	350203
295.158158293535/2.74841666666667	1.24959e+06	1.13968e+06	467902	605890	978081	1.24909e+06	1.03088e+06	844863	1.71643e+06	1.31533e+06	885126	850966	837040	671525	800204	1.44696e+06	1.57739e+06	876076	1.02314e+06	869361	1.55399e+06	1.69685e+06	1.65315e+06	1.9702e+06	1.63412e+06	1.77318e+06	1.63629e+06	918477	2.08977e+06	1.60527e+06
532.339986961166/17.2553333333333	601047	540929	659908	631432	372479	423008	464283	357755	453261	336313	244659	275902	722802	313914	321732	300404	463871	375526	407018	227887	651725	616475	689140	405872	514739	476075	352415	380271	422839	390137
152.055052396519/1.382	505860	447207	503391	427626	424298	468817	408998	474901	390556	540495	421673	452617	370925	520971	408645	451830	447716	636193	357663	387198	405351	396678	405602	322792	287174	292611	309320	343151	316141	275808
834.597915442335/20.9816666666667	0	0	0	7239.67	650461	644802	182853	1.17628e+06	437303	282437	1.79527e+06	957503	732018	2.39547e+06	1.85325e+06	3.59806e+06	596501	0	0	547592	0	0	0	0	730920	467973	326389	331719	845493	240322
778.537303080004/21.3386666666667	0	0	59352.4	1.83324e+06	323737	518070	550916	686613	342771	584207	662385	2.09364e+06	645653	72091.1	1.47399e+06	1.75311e+06	2.0193e+06	0	60591.2	1.12472e+06	0	0	45723.7	1.29871e+06	701988	747245	487917	334723	252858	251674
524.198493429265/1.54075	2.10703e+06	1.34854e+06	64787.8	0	147714	829964	237332	72099.3	1.57567e+06	1.97312e+06	0	0	0	0	0	1.32855e+06	1.99624e+06	0	0	0	2.41446e+06	2.46514e+06	2.60609e+06	2.15381e+06	1.84415e+06	2.20907e+06	2.04852e+06	2.55665e+06	2.26745e+06	1.94104e+06
137.045824106606/3.99083333333333	1.03276e+06	358220	454320	553532	752746	699429	515455	684475	419168	535848	1.70396e+06	630267	550536	1.26682e+06	590394	835180	308427	1.43937e+06	737135	1.37799e+06	344916	854872	530526	343804	462077	683046	334332	866209	362806	500373
646.384195855148/17.7216666666667	907077	811660	832384	746091	364503	188121	577915	1.49955e+06	586212	405891	643064	592036	1.3456e+06	682355	533274	748266	1.01285e+06	375122	242781	296859	707689	712775	709170	889485	950252	770140	606622	571356	239879	482689
341.305652040307/17.921	341014	345140	943101	562083	339411	233573	248312	735247	221853	340395	332116	348843	909982	444820	314018	307221	349224	306954	270050	292497	447773	408229	368963	386505	421921	398289	308124	288323	316308	345491
500.279135091654/14.3368333333333	282994	357271	815789	815723	175137	188283	27127.4	163368	329971	67961.9	245935	343269	1.07048e+06	147311	293749	330014	494332	85629.9	194253	243107	618485	207276	365533	519166	687509	324188	209152	175567	327656	316415
307.084266508014/1.31408333333333	356434	750898	475736	962279	576505	627652	741567	170571	695648	400609	103601	241845	771202	31448.6	547122	272474	382788	153628	852393	70545.5	373747	668788	498411	431782	557635	426132	426868	505263	630350	418768
461.210669679815/5.19641666666667	274912	364603	426807	446421	482453	353479	398112	280852	379813	286682	186290	268719	425436	212568	310660	186163	198249	152859	282359	281261	347302	290365	463641	435970	524002	493597	389383	315811	408175	365760
160.133068363804/1.28433333333333	278113	241511	169215	198341	310371	321021	228564	298727	178009	228542	253197	350389	289916	335383	251195	688595	209007	266685	596956	380472	458410	239687	304727	205056	349177	270202	128708	358158	319890	211020
432.23927730661/14.2608333333333	335296	209241	261043	302644	246039	308828	286499	283497	358009	380932	292919	345825	222977	314430	341497	268073	265797	390550	414593	330607	177663	377044	379243	366805	339398	320280	262705	276977	314045	346678
642.362528838975/15.5220833333333	556349	790211	613801	574411	709713	458147	523517	963005	876122	981157	232913	500088	1.07227e+06	248351	307388	939639	1.366e+06	400718	299283	351054	555749	645249	634517	882030	657901	668109	424724	349186	585203	283537
828.552067206995/23.1075	0	0	1.0258e+07	212579	515907	465616	491914	82794.8	67874.1	1.03595e+06	410371	554247	773064	0	1.18984e+06	853862	637660	0	189710	241719	0	0	2.91775e+06	187317	682545	2.62021e+06	2.73376e+06	493194	1.94683e+06	489586
263.132308163388/1.83666666666667	287712	275479	120661	160136	308070	319943	248607	239490	348846	346834	290199	349446	250946	272114	311215	499681	446478	416413	320880	268526	216805	285607	266283	308202	295958	294854	244979	327951	263411	154952
829.555630431498/21.1966666666667	0	0	0	7.685e+06	162218	272262	64414.2	222655	20427	100629	145267	413916	177850	485442	735320	169174	189335	0	0	685634	0	27767.6	0	1.28801e+07	645509	191379	169395	19651.7	26867.3	109429
466.300206920606/13.4223333333333	450565	740486	408777	292413	416361	480160	777586	508568	378360	0	40036.2	93235.5	103630	75960	67573.5	70798.8	94847.7	128313	67565.6	88887.5	462941	332021	329194	262480	482666	1.29668e+06	410283	1.42753e+06	238047	485264
445.31536604007/18.9768333333333	199132	143320	239495	208445	356043	101980	119610	165168	60140.1	116264	600493	853352	754422	898643	854477	596494	328201	751458	550462	591334	79458.1	86296.2	82327.6	57254.8	28671.8	42280.1	36603.5	46087	43243.1	28765.2
140.068141870113/1.19883333333333	381284	228551	506941	287542	431701	230147	425007	460040	274160	373387	114158	204383	207719	131201	166699	192233	95332.3	208494	215792	133290	178818	167136	209901	192197	231155	348001	177203	342254	450465	327699
627.389085821735/6.92766666666667	153700	148074	103081	150682	197894	242459	348262	234042	405138	520500	516156	871971	249977	590488	308442	756113	965193	387006	225257	472334	78973.1	55587.7	89112	43033	59011.9	69358.6	88940.2	86403.8	72682.1	76143.2
468.343632093766/19.055	394839	466673	602764	360789	306655	217067	215744	538593	238835	206432	199933	1.2129e+06	244285	218047	279664	474800	211766	144758	241389	79075.5	691904	509319	461102	277810	260280	391510	272494	272625	349849	300305
263.237165202377/21.623	1.02565e+06	640232	998239	0	140277	39859.9	335698	496597	257736	390332	0	32622.1	782506	0	686513	565284	453924	1.42838e+06	558344	0	705784	857710	514197	0	42166.8	350317	282716	337028	328626	237296
411.322071040005/18.5541666666667	420369	265737	458101	346147	692241	264069	342060	395892	238114	593142	445573	472377	328621	499098	432513	360589	170050	432276	324501	407462	182286	183873	134250	143704	84012	161099	120396	139260	141911	74235.4
121.084123204621/5.116	394437	349147	392271	377811	365642	383870	306684	346128	326391	439297	416045	441944	404130	498193	419659	494092	410044	525987	376715	415765	414148	336527	452110	288650	311476	312907	327107	332137	397898	350841
249.155165253395/1.23383333333333	604106	164322	278501	137635	300875	249552	221698	467761	110217	227916	80701	137940	85584.2	156625	117761	145402	80250.5	174278	114721	64951.4	276587	550901	258302	358033	123764	138891	73307.1	163543	376571	102438
418.307677683737/13.6020833333333	115509	116219	207499	188327	257040	92301	110223	109838	70243.6	107706	435770	879991	917224	618673	879722	571167	365779	431014	442170	541049	53555.5	42748.4	66718	89167.3	46432.1	69771.4	70104.5	54481.5	59519.1	33891.1
123.044791245409/1.56725	1.23093e+06	1.22598e+06	1.38636e+06	1.14489e+06	1.20478e+06	1.08028e+06	1.05582e+06	1.24895e+06	1.01672e+06	1.35913e+06	568852	1.50138e+06	1.1384e+06	1.5618e+06	1.18973e+06	1.4341e+06	1.22491e+06	890834	957045	1.20652e+06	836074	978712	1.08824e+06	854929	741787	796583	878934	1.05521e+06	983083	709330
103.05470425582/4.74916666666667	750881	672509	783001	635065	690731	703128	589857	724249	610711	795442	833735	999424	731309	1.05548e+06	821115	954802	907836	841982	625916	774909	617703	615767	692377	569280	527571	548811	605823	615062	588993	505311
358.283059131568/15.15175	270151	107295	56292.2	74043.3	63691.4	65799.3	203109	232609	132277	122070	998460	419487	276075	795525	337497	168960	375716	966357	975269	566462	162596	246740	165867	271795	144131	286502	286158	382410	101000	156358
596.351911002916/8.97333333333333	274677	190799	237334	251750	287618	336052	211504	437381	120573	407546	112153	52856.8	76785.7	120723	117302	115974	71385.2	49734.2	146078	35464.7	345907	141530	157726	132047	663296	1.27501e+06	546534	367869	162625	163614
137.0458452362/4.435	1.29733e+06	367235	136725	84333.1	342581	296561	200272	631954	366821	737061	1.04411e+06	515608	176057	890048	461496	930368	382886	1.0324e+06	162204	560271	609328	932023	445456	362134	330190	460704	389887	416866	304861	313503
809.586666916162/20.6315833333333	0	0	0	427943	1.28399e+06	657748	751593	921380	626660	2.06846e+06	686177	253570	353851	306054	509054	198252	222318	0	0	3.87271e+06	0	0	0	402089	969454	689309	430528	529920	1.47932e+06	708764
809.58721667898/21.0116666666667	0	0	0	1.00841e+06	1.63948e+06	817781	1.00269e+06	1.858e+06	574867	2.72782e+06	634628	1.5528e+06	383577	271429	921590	315239	439400	0	0	548885	0	0	0	909400	791707	466027	494534	476563	1.02685e+06	669283
281.142235101224/1.30716666666667	361266	382231	122909	210264	365293	421952	328433	291023	479411	430674	273310	319894	258454	240083	291567	542101	539230	394842	335838	275071	304442	374439	375172	432091	438104	372633	344402	436993	367293	244543
227.200399579478/18.888	860565	361759	957641	420804	464728	196903	291821	1.10418e+06	234138	886234	203128	17406.1	272280	85321	17943.7	39779.1	10611.5	107392	0	43912.9	516624	1.04512e+06	245660	602453	561519	747428	281437	349634	592319	280912
143.072869146803/5.766	506411	421406	484480	353979	403442	434895	357421	470693	378135	545548	467612	597326	333345	644102	449417	625892	560611	516139	311465	401475	402615	392143	449335	339244	283763	300198	336530	379673	344637	285941
497.344499170178/19.6384166666667	271031	389532	1.43219e+06	557443	300922	174754	237364	290006	225220	122468	229740	512589	1.8511e+06	308387	447133	424684	485961	196049	365064	196782	399961	329478	349081	387330	423912	370285	224034	147541	220406	200371
415.19512797384/10.6629166666667	677995	592050	217576	246492	342941	644127	1.04545e+06	138497	993619	565726	105029	142496	271145	83247.8	408373	192394	168147	344434	170660	123778	667553	504352	438427	467492	637327	371350	314426	354135	271347	581958
757.558876975722/21.339	0	0	0	1.19657e+06	406619	638024	773100	728080	574198	703198	876618	1.50494e+06	763481	0	2.56188e+06	2.10772e+06	2.33696e+06	0	0	2.40284e+06	0	0	0	434805	716866	613847	577428	547356	279872	326150
148.061005548947/1.3465	875262	424370	884405	834168	849924	473329	451213	900083	501282	919234	363881	450993	382038	665664	504122	357421	373849	1.31553e+06	576691	514348	633718	349992	1.13819e+06	494596	614770	269204	965986	1.03495e+06	620112	879317
732.555261584008/24.574	26182.7	0	0	44256.4	3.05327e+06	2.11895e+06	1.45817e+06	1.37652e+06	1.08998e+06	687723	434127	108955	117439	1.26564e+06	340594	462471	155189	0	35481.9	256736	0	0	0	91770.4	2.112e+06	867060	965479	1.04774e+06	670884	947104
119.049515532759/2.21083333333333	348710	279261	301316	262106	287038	276599	276138	307034	267161	281252	346366	232621	316498	331800	278199	292247	317765	298169	274734	327667	292442	323906	333515	329961	339176	375243	378024	394201	456864	419712
279.190619195563/1.20183333333333	182726	173975	422822	296751	338555	223178	254357	649120	135014	259121	105594	169312	147538	143593	174994	182046	141877	176012	150288	83432.3	128703	98762.2	112700	91736.3	140441	142773	98245	225379	313188	154772
966.651650828189/18.3843333333333	346042	363125	808681	526005	320386	0	222759	651639	10550.4	303891	300870	247431	668734	389534	268011	255314	262514	312524	245833	252046	482037	418565	368966	386611	412682	357496	295929	283068	297514	308811
207.102808913967/5.766	490792	411398	490356	353647	390659	433143	352346	471366	358175	511650	439130	581226	321653	571338	443580	572998	511511	516550	314528	408436	423760	401131	468752	345232	287616	294674	330289	360308	333479	274514
452.317139321066/21.272	474765	596804	1.06249e+06	0	0	223943	194136	146062	79056.6	234506	0	1.16616e+06	552908	0	1.31779e+06	534727	255812	744008	993309	0	275416	188930	410961	0	0	84802.2	78342.2	45367	48807.9	34744.2
468.323806846081/10.8406666666667	459802	222625	194573	370121	684944	332182	252440	425866	269509	627409	285536	427318	375773	272209	470937	361634	298584	321682	462284	256826	218626	318055	251059	214710	318207	768318	348894	540168	166885	148627
614.367538578553/18.0006666666667	573746	638099	859915	883373	987276	579015	592136	920152	530785	448162	236328	263231	868153	295373	307458	327003	569993	277805	325826	345941	787170	598316	529147	884626	1.01165e+06	884031	480003	472565	546123	440113
374.277874845814/12.3705	322750	123196	48557.7	116804	237138	617733	146297	47698.5	117514	240855	191214	1.1721e+06	312375	139070	623106	241879	190778	169847	590925	101174	112826	103690	79284.7	159310	314235	1.00198e+06	239832	456148	71197.9	147458
264.144249230639/3.22691666666667	1.48829e+06	1.41924e+06	328584	737433	1.22609e+06	1.82935e+06	332877	490234	1.94759e+06	1.27512e+06	281277	378541	226582	433472	329121	227528	1.2141e+06	563784	162742	427965	1.98456e+06	1.03359e+06	1.81869e+06	2.48306e+06	2.43602e+06	2.38152e+06	1.61345e+06	794424	697191	1.11617e+06
419.278010846519/18.9711666666667	465536	451614	432302	427753	390116	348900	366280	388066	349179	411179	453009	463008	491035	476223	493500	459713	469317	556344	566724	497120	510748	445146	419910	412378	432808	371348	429478	339801	339191	330657
206.047915684794/2.1375	1.75345e+06	606913	399121	736395	748338	366769	770040	645742	604414	315803	377769	597912	541005	274995	618113	304165	241413	201819	384413	357423	758365	803094	594289	1.13741e+06	656715	729939	720194	565811	766226	411845
416.317164281275/15.2695833333333	281648	178915	73273.2	62403.2	267040	119674	141010	265756	146933	349325	51994.3	83507.1	60319.7	42405.3	67841.5	66904.9	136950	152740	94307.7	189802	117856	279896	346692	330313	370177	1.53133e+06	502494	2.58084e+06	316563	243181
213.148547200833/14.2051666666667	225927	123437	569543	197524	581153	634169	385381	342156	446131	629292	119336	184635	294617	242282	384951	185061	85653.8	672846	235314	677849	89238.5	31891.2	244748	182332	310968	187682	162710	139259	221531	233096
327.309153289344/20.4266666666667	164997	167932	487076	1.32096e+06	801086	395633	171339	758706	141882	145505	453517	522126	225516	439706	142446	120953	118864	132920	136193	350570	200260	96908.4	127553	491276	360498	612407	78981.7	79240.2	123292	84528.9
802.536641598056/24.4690833333333	0	173863	1.87575e+06	0	682142	721506	429806	392700	435355	361138	0	0	272679	334437	721852	1.21441e+06	351709	0	327851	0	0	177123	2.12558e+06	0	810582	698070	723486	308419	266075	358999
614.162923550402/1.299	338718	597774	585656	816981	540925	621980	663222	209576	558920	450594	192907	408221	737798	32681.5	648648	362361	444413	209730	792659	120331	238296	381155	412106	308629	359233	246495	284311	350554	338178	218524
814.578765602548/8.35083333333333	188007	308911	278072	288031	229817	162321	202178	217975	187029	321689	249378	168541	142382	212541	178854	241448	197672	215803	190818	216753	227955	256547	236665	352243	287239	282658	277375	252753	241901	319293
401.267736726645/20.2415	879461	751374	154048	528294	0	110243	148800	136929	103427	137825	76240.1	44374.2	110593	80483.4	151336	62408.6	48596.5	601319	362597	119839	882664	820091	742604	353698	185642	163028	121674	159086	212755	142835
538.777656466454/6.448	353145	371997	763798	364405	365613	331911	372727	1.13587e+06	313521	243508	262681	40075.5	189386	177450	62071.4	34583.9	39071.8	66460.6	277200	177136	241806	321919	149739	166912	128512	233317	239994	314822	285946	139877
830.565804291477/21.0306666666667	0	0	895694	1.48777e+06	1.5659e+06	686581	315578	549357	122202	326642	548259	163192	226473	528588	988974	171207	156605	0	827984	956207	0	0	643329	2.26562e+06	921853	318155	298692	177299	361241	224586
355.303956399879/21.1206666666667	817490	443201	968689	147140	68954.4	0	162465	416236	130683	593945	116520	0	488014	85722.5	277772	201643	149601	474143	218654	0	364038	463043	194220	53967.7	0	176544	87999.3	64309.1	89365.8	59993.6
571.288078356132/15.594	285076	164355	249513	286244	499827	280418	68863.7	488341	235586	41439.7	658228	529379	202829	434989	497563	301902	5778.87	496383	560229	793977	0	422362	68229.9	77897.1	169625	203160	179873	415759	275222	313058
350.267757010453/20.6050833333333	871572	797203	645694	0	569963	0	68902.7	275305	75799.9	201583	69274.7	76497.3	86094.5	3313.73	143539	66333.3	85484.6	511870	293441	105164	584889	763427	429097	270733	82529.9	109087	52834.3	59905.5	80320.2	39916.3
604.297637577637/15.9716666666667	66276.3	465934	0	916282	934375	1.09244e+06	234087	16522.7	978099	325656	493084	150136	389606	133482	737215	267984	724218	81163.6	1.15587e+06	487997	329900	509576	77859.5	389175	401007	281057	501054	261472	464996	912897
590.322975360866/15.0914166666667	312770	304647	198778	210830	345869	315690	280753	280552	217682	256958	492862	287941	241380	416018	360432	329629	259439	498830	370783	365927	269353	348195	332120	230783	244338	318758	278609	408284	325213	260931
834.59827464273/20.6065	11408.6	0	0	3575.19	565924	661045	291455	2.63697e+06	436142	965040	70221	343482	896798	1.34529e+06	1.62213e+06	2.14979e+06	409350	0	0	20050.1	0	0	0	3010.08	137140	963175	471221	415712	445550	313871
542.322708346974/15.0265	493794	515815	414925	425021	355205	480864	411163	319301	472708	209489	236296	290433	379362	210863	329991	411086	551067	255522	284291	257062	707147	583137	447443	609720	442973	463821	471456	431296	407938	351221
312.111818110751/2.27366666666667	1.09528e+06	400853	21493.4	80403.5	188147	330874	121990	79244.6	47797.9	263048	99159.6	179525	107911	84248.2	133495	43184.5	421850	141468	97883.7	62481.9	687995	294230	462050	656154	545655	454363	385733	703659	35531.5	266362
415.308062408301/21.949	995908	664536	1.34997e+06	0	0	0	171349	378655	157382	609649	0	0	382715	0	587506	235255	86221.2	868449	539846	0	392425	416232	277307	0	0	71928.9	45562.9	58493.5	43980	24033.5
407.792240164264/8.11283333333333	280143	353974	354825	361298	357318	293596	327554	342054	300768	353835	193902	207568	215970	185970	227446	207661	170283	178467	209563	266569	403633	403608	396497	476814	378093	534327	447448	471835	440927	394431
839.565338588728/12.3648333333333	178904	49517.8	7751.65	47133.8	85045.6	592544	93393.1	0	49426.1	95977.2	85178.3	1.54847e+06	217045	43821.9	330806	119674	91410.8	112353	584785	38276.1	0	134274	84708.1	82782.2	166132	991421	146599	307747	22245.8	75079.8
372.296406535682/18.7885	357311	236992	167063	170406	188873	158350	111032	359373	106443	217933	1.01858e+06	487828	387716	764191	521771	287790	415036	1.146e+06	843012	625936	161488	226949	122607	179854	140574	137275	88118.6	129405	77092.7	71076.1
785.588234706798/22.6921666666667	8001.01	0	0	76776.9	310783	717929	3.36427e+06	1.11619e+06	3.71135e+06	2.30807e+06	80073.8	621634	350834	357020	817078	384527	573045	0	0	63938.2	0	0	0	87734.1	578717	1.14924e+06	2.24884e+06	742455	1.9125e+06	1.74264e+06
508.376836683431/17.5665	1.08674e+06	793724	2.38516e+06	764333	854249	551174	386345	1.86111e+06	337187	899714	344238	183336	261862	316247	132680	125837	125944	475836	337093	220560	588089	682593	441331	407832	221752	269181	245783	476789	299064	283875
282.101445782752/2.06741666666667	636986	600576	206227	434190	718990	803918	656563	319141	1.07829e+06	515778	187361	183666	383340	168924	213189	218565	499472	169351	344023	204518	987384	963328	813801	1.28185e+06	1.21805e+06	1.13614e+06	846811	842222	837544	702032
385.118844627173/5.18616666666667	198542	377124	140065	214678	117247	317252	176328	93936.7	236394	124341	65787.5	90640.1	146568	70515.9	150724	169220	281271	114299	142784	131117	409417	360392	437728	510480	888412	366812	428891	376952	604786	779384
344.262591900194/19.7281666666667	771462	536469	3.82884e+06	892058	392081	331811	310785	1.47132e+06	225951	849806	138288	495215	553042	752160	420643	539063	218701	579822	299326	125804	443818	486620	297689	179775	143780	133117	266126	162971	281289	154683
366.337550787033/15.6410833333333	124030	96626.7	284905	204206	624278	161005	86682.8	449684	0	0	965029	434817	536439	1.08453e+06	492020	190121	94272.5	739665	383338	800594	0	88869.4	78248.1	75821.3	24247.6	33715.7	58707.4	92428.7	43624.7	42008.8
499.350277468708/16.10375	457001	470444	674291	546632	465640	409963	399392	519568	410604	415606	373277	269690	748693	403371	330791	346794	427977	401858	367987	320437	489106	461335	475535	486870	543569	477155	433548	442116	446472	460506
979.578929689164/15.3066666666667	225748	171516	506752	384629	127657	165658	186492	147822	299485	92436.2	74206.4	208861	196097	92485.8	173469	160849	153401	90619	217162	130103	391227	0	259705	408635	224809	155252	197686	131517	143148	231916
701.560482932447/24.535	0	47336	1.34702e+06	647002	863490	689135	662209	580381	506976	548045	707268	471415	380114	573157	663535	345728	371223	0	24329.4	0	0	0	921059	809194	570904	519416	551845	561849	383140	522329
527.381660632517/18.488	534008	535146	561612	547594	452188	434067	383292	439198	409640	485032	342492	321289	591634	326460	352916	390423	446146	385111	397291	333755	549530	513645	496085	533333	545297	544171	489105	464682	462838	498969
309.147745736007/1.41158333333333	837144	547969	258703	416638	782288	561189	310914	486887	432001	595012	978095	1.16046e+06	513355	1.03558e+06	879769	1.95749e+06	968605	1.19185e+06	705801	739092	203190	356655	394878	261563	125538	415609	112532	430583	341034	463316
228.142214775013/10.468	369098	251786	329643	201110	381846	415796	360596	327145	435110	435434	186626	250651	356186	276598	325020	236677	168968	400634	285536	425351	278435	67004.2	222404	247831	271330	234311	212033	167994	244555	293495
280.092715737658/1.16558333333333	357926	205966	155285	130907	145042	219548	273784	191099	298676	284548	220131	171941	179890	172632	129456	263400	166159	168046	140168	215343	197781	342822	213263	162963	98477.5	151084	132963	164971	150472	130801
360.257713163759/21.122	229240	869757	772782	35280.1	0	343773	215251	102945	164350	368078	6538.35	318422	320600	0	508615	353018	263816	255109	437428	31454.6	630650	298689	580306	15251.9	0	191399	220431	90169.3	182059	169955
576.434922851951/7.85108333333333	158649	177250	200027	172267	239752	142139	132969	209619	133888	221664	213350	221177	193369	202975	249529	175368	147013	136722	186563	367085	235925	210302	217994	304459	180617	414513	217660	216361	244271	168754
318.120524452582/1.89083333333333	427001	217537	450550	268818	385838	256267	306023	488260	216728	443839	359040	281061	163123	436683	228181	242045	121863	765709	239089	299846	203699	213260	193609	193871	120092	201486	150167	155936	113847	110244
498.269214892523/6.3705	174041	141759	164262	145678	264515	234165	296855	388174	375998	595847	400050	421086	344674	550793	353334	356312	292701	391574	356102	518876	79906.2	58790.1	71278.8	61763.8	56373.9	71214.3	68538.3	63356.3	54889.3	57662.2
945.61836164181/7.399	0	398364	75353.9	330762	570056	570110	289938	77560.9	376994	94600.4	338948	692554	404510	259010	817815	1.14416e+06	976900	220854	921189	619525	0	93296.7	325715	263066	276514	0	0	276427	238824	98418.9
169.058495590006/1.166	253759	224842	220409	203408	180757	184728	379264	179259	204800	195709	143212	179718	183761	120727	141965	103159	116683	189312	148453	174440	248617	244713	201514	206449	200520	268264	195767	187016	223815	221538
425.346968750308/15.0655	142757	97965.8	112784	140890	277598	135932	130541	151257	17640.8	36788.3	419959	593837	265581	514681	539868	296779	176608	603066	458028	490916	175972	188530	106857	105819	73977.5	85782.3	125787	140925	124024	81352.5
905.681184570184/8.491	153941	311290	270827	281827	199349	135058	196095	214483	167762	194628	292058	225639	167610	262935	33204.6	309343	232223	239782	196167	400550	201315	206292	195708	193817	153109	242534	224735	216819	215081	163537
452.328975156178/12.9034166666667	271981	154593	77061.8	190986	280013	77055	89804.3	586243	56933.8	129133	433420	281228	154819	740502	242105	214161	336041	613982	412811	597779	68314.1	170734	107714	125302	193058	486419	245561	448808	99654	99984
765.526949655592/24.55975	0	22005.1	364374	211545	547937	185800	565215	703036	431570	548581	697794	393908	441701	27473.3	638436	555970	438483	0	0	547378	0	19111.9	717585	605726	454245	403004	531922	484855	367141	461901
464.333932637967/8.267	269536	338432	332560	340340	320334	253021	315867	327193	273286	315667	213269	202811	208519	171786	232187	197731	167118	183799	204857	262059	403491	391021	366779	463413	361978	505937	415024	462734	414500	377899
182.204148767652/1.56966666666667	825551	703092	937439	472149	419567	639497	296764	633737	147618	735147	395532	431322	640954	566970	674331	966715	975294	281401	130860	208829	453842	219766	652745	218854	0	0	0	366146	0	0
644.378119514596/17.9728333333333	245763	362582	158241	275530	318660	204169	250535	108166	172793	238633	176265	201786	439424	261718	257047	288777	307669	226785	126343	289407	280809	290525	307717	271596	266863	227576	212312	193272	187674	135687
429.320288772445/21.372	253804	22310.2	378383	0	0	92956.3	97811.4	101546	35233.1	82556.2	0	784325	689961	0	984989	477493	237932	1.15816e+06	936758	0	90523.9	105011	127456	88709.5	0	44572.5	36261.3	21267.4	24944.4	11552.4
353.248073994782/22.0775	236307	198677	1.19929e+06	0	0	0	45480.9	53927.1	37640.7	62766.8	0	0	0	0	24244.2	6548.25	0	504302	96793.9	0	1.59232e+06	1.02915e+06	655688	0	0	39092.5	32188.3	44903.2	31053.7	30675.5
598.387749028299/17.6045	375670	424650	405330	574379	98265.7	199406	185732	204314	381548	134929	53369.4	168955	538933	75215.7	192907	401957	1.01355e+06	326920	217950	156573	768858	466517	311600	353217	507317	186722	190778	196836	291789	185707
114.091771382034/7.90316666666667	199720	284388	251258	257853	299031	203398	209162	276773	201928	300408	302154	268817	233527	277054	321145	270063	204037	218055	254722	478064	264542	256881	258533	384659	237085	458358	279513	390837	317105	255281
252.108014796334/1.199	243324	399116	227733	281700	273638	445727	377802	207590	483481	279439	270505	286604	254477	193242	311577	411634	556123	358260	337153	266927	238651	323549	301613	381934	472710	298197	311014	270275	227398	266625
298.097133606889/5.683	140946	168859	113416	178552	151514	191478	166877	120286	209104	167027	151332	201193	218083	124507	214902	194191	199106	170045	252272	160162	290653	161704	255849	235298	237630	274755	290378	237537	248851	337965
471.148036298542/1.95266666666667	46514	471234	18429.9	476994	303789	661890	344585	0	653744	141888	0	91867.9	146203	0	230764	400926	439725	24018	229982	0	465899	145696	547285	689451	907219	416951	577835	293737	433505	647785
551.391228080519/18.9735	390305	414730	972127	532537	206351	292181	257897	411719	334722	349593	124428	142827	833874	102622	175012	285332	610260	223092	262486	49015.6	501286	354492	237656	433473	446184	274198	200514	233364	293061	272842
472.304365276069/12.5378333333333	401857	283664	252740	446461	573738	405419	326356	295664	368132	411498	161116	307478	193874	133243	282777	256083	277092	169931	172196	122846	241093	416172	354244	339079	429644	823726	475482	744672	355314	352454
642.362481329051/16.2161666666667	479320	748959	1.26928e+06	936235	883583	609842	772243	1.51705e+06	1.20929e+06	760936	163622	358293	502034	427343	255370	454997	580364	591959	166461	295445	677280	540516	552184	1.09607e+06	1.00186e+06	1.04922e+06	711361	458183	550916	311153
622.2567289396/1.30616666666667	496648	175037	0	0	0	59827.4	18083.7	0	318265	390239	0	0	0	0	0	142385	337234	0	0	0	1.23382e+06	986020	717276	771172	631346	1.1741e+06	1.22721e+06	833312	801477	1.01082e+06
504.30130315215/15.0515833333333	277169	320583	479026	446027	244584	275011	319685	290495	337586	282730	102239	167657	280596	115371	167996	134184	139388	120697	158082	129841	345530	253263	375143	355141	408401	315226	283449	298630	324444	403581
560.370030772343/19.7596666666667	274816	468495	722360	402283	270257	196849	220528	93405.9	254419	128223	164972	277878	1.37034e+06	132889	303783	350179	425432	107756	443014	0	479597	340126	443445	523859	482352	521673	244495	176044	197648	190908
566.426482719517/8.51783333333333	201165	271337	274855	279759	220334	158223	229765	302275	194643	282057	305919	318809	212101	261976	321356	231221	158179	305219	182029	400857	320044	138788	135740	350155	369858	126016	63265.3	95160.3	283543	438373
425.193647169209/6.64241666666667	500493	608256	123970	181864	358565	371324	272334	272021	267990	601131	451265	464648	284378	434337	268131	984211	681911	661194	206328	857198	196409	309224	192941	121338	153271	141027	120296	229999	156736	48831.9
525.365506255898/16.737	551464	620968	635266	569690	393834	491422	431533	501746	479023	457525	203174	199294	632733	158627	280411	324647	447632	242588	199325	227224	602940	516435	379798	529122	504740	498563	378063	387338	417325	332851
156.076630910309/1.38483333333333	1.00377e+06	920236	1.38715e+06	902367	1.07957e+06	1.07222e+06	883592	1.10595e+06	826302	1.11838e+06	868075	818220	815538	995215	703450	856273	759880	835571	608521	799517	771801	732753	995950	688977	612033	769440	674333	631029	719214	612600
127.046057694595/3.33316666666667	1.31049e+06	576537	450219	425210	610329	261503	320002	858784	195826	497559	1.16808e+06	1.23973e+06	969504	990345	1.65276e+06	1.02837e+06	789675	1.19971e+06	655110	629697	475700	819320	348351	359752	241667	474907	352505	433314	345234	309132
806.431317022753/16.5725833333333	646814	221148	0	0	53783.4	86720.8	35855	58886.4	265683	640839	0	5360.65	55411.6	0	22245.7	395052	620959	74128.1	5067.85	10732.2	720636	649405	557794	853857	711540	1.51595e+06	899732	586058	834767	540765
415.212908214908/13.5053333333333	319128	105798	132078	172558	91317.6	134855	135106	181311	35758.7	374990	269024	225686	73824.8	120167	336252	227353	304557	144439	396266	312129	39653.3	396729	386890	281739	323548	342082	140089	225786	312330	295780
929.669138501272/8.267	349743	373934	359501	369722	368593	339493	357848	387694	337727	392187	335707	317088	275692	342139	311866	314157	285006	332980	288009	357737	383827	345319	357363	386343	333836	403179	364168	401217	367773	345112
347.086651154745/1.20258333333333	137169	195277	136532	288825	330847	297491	287441	233087	168128	176153	375897	374885	313426	325998	266788	310923	362291	54727.9	399001	348380	98580.8	112403	105702	107150	106760	39177.6	117531	112643	68442	69805.9
783.570371740938/20.3311666666667	0	0	0	117128	1.17827e+06	256444	633925	313068	556932	665276	383822	706328	447231	506644	758524	330616	856455	0	0	1.68972e+06	0	0	0	294653	288912	804564	604952	837798	760825	525942
189.123078648529/1.83133333333333	227314	218863	329407	219326	233734	228299	211281	367931	193676	258972	352394	270208	253841	459069	229524	218394	187837	294289	216036	250563	157705	160520	198635	139143	105431	63301.3	145964	174600	147862	120103
437.194574367726/14.2805	320106	249843	275060	258467	252393	262442	276871	254742	318411	312425	263588	263718	218461	277842	301624	189475	200591	323480	345372	269985	329198	384803	384110	339746	326700	323727	297343	314741	334453	369589
386.270206325317/18.8625	135461	149768	223565	190028	386740	119210	111694	157562	71793.4	119561	349811	648932	302873	553329	824587	405808	192475	366685	529188	443200	80015.9	75542.1	114114	55238	50865.6	60865.6	58478.1	77129.7	74787.9	51275.3
703.576305995158/15.25	0	0	0	1.59482e+06	939386	921183	428514	1.22541e+06	413169	437991	2.38801e+06	790452	774943	0	1.25463e+06	1.03653e+06	696043	0	0	1.79014e+06	0	0	0	1.67538e+06	933244	499036	610810	560766	427640	379932
222.189126942388/1.19841666666667	193505	187080	406797	269758	394354	229281	283335	398375	147815	233650	191580	280918	223973	289693	264985	182502	85124.2	265561	224406	203713	93837.9	90067.3	122607	95217.4	81959.6	105290	92600.9	167740	158704	113556
202.10740254245/5.1995	227505	263631	282901	285203	343352	262481	250905	237745	259758	263764	308453	357104	410285	354795	372187	306624	300116	247996	308414	323970	232471	202570	292322	268345	308279	320407	258888	259909	264685	233478
805.555954431534/21.0024166666667	0	0	50294.7	326695	3.85064e+06	229566	145264	995522	974691	214548	87625	59974.6	225009	117564	157509	116006	369200	0	32863.9	1.00071e+06	0	0	17023.2	423182	411406	164754	177006	2.04208e+06	1.52435e+06	169427
276.144482583599/2.062	870942	636046	181598	184682	1.29589e+06	942107	763427	907253	2.43617e+06	1.03076e+06	928431	597982	574338	523109	481971	1.04096e+06	2.09259e+06	268236	400133	466874	1.3144e+06	1.59318e+06	2.18046e+06	2.83854e+06	3.08253e+06	2.60637e+06	2.37707e+06	1.96274e+06	1.10917e+06	1.71151e+06
296.153383215298/1.08175	244648	253893	135285	200713	303071	302353	208552	189374	189989	309579	172683	373901	230580	84654.1	375456	611569	469667	444310	271322	291004	118250	136621	183703	138508	135204	120158	129452	149658	144965	93634.2
154.042960713634/2.06925	426826	563568	445636	654975	634371	446049	801155	425416	877262	338273	379373	149106	509787	118423	475532	169622	221828	205640	655251	526467	626477	522333	440610	613221	622803	666772	528107	453845	418311	504924
213.12332241542/1.29975	647390	1.05655e+06	402156	363574	398433	489215	359590	410033	368413	592001	557233	284999	265551	635580	213213	483766	355446	858601	235955	879700	500637	682916	418213	295510	304255	357912	310106	563291	341442	184008
993.952112654588/16.104	255314	267061	465823	363934	268434	216150	200217	331571	198740	219253	177861	63775.7	564310	174021	116438	142441	255577	214523	182192	139486	307119	212218	253712	273914	327211	280014	228925	247658	257708	261032
262.164400598103/4.35408333333333	345497	244606	284077	342312	274952	246783	225298	513061	295267	350384	254705	304038	284203	361140	356639	279681	265865	451840	347528	358880	651031	300067	268111	305145	257439	268133	241483	288140	266228	259457
664.172399569715/5.11983333333333	142455	198971	352303	243577	277883	241289	185790	239852	213804	184580	325735	117628	178349	188275	130825	122035	160969	350575	400810	456400	207662	357121	226311	183574	184517	153153	170361	301156	173606	185289
326.123992256145/2.50716666666667	720154	739452	157070	690940	1.0242e+06	993737	721038	584539	816279	841558	674774	948858	590372	771196	874232	1.92091e+06	4.2522e+06	713030	1.05296e+06	626533	309984	1.45891e+06	525312	412460	571266	538210	381514	275487	231172	255570
809.587306397573/21.34	0	0	0	220205	587269	602073	902335	831095	546796	1.18454e+06	218154	1.76243e+06	753666	255754	1.27417e+06	1.54855e+06	1.41012e+06	0	0	302221	0	0	0	146438	621361	631478	979064	1.25363e+06	973763	596905
615.417024129492/15.2163333333333	223598	233620	230177	218462	164405	147848	188692	222217	160508	209987	187496	264950	110557	202023	189400	278405	236408	104844	60570.6	94059.6	152451	187818	131774	210598	168313	190957	115463	129249	108465	70695.7
346.274599046236/20.986	672928	528737	665177	46305.2	82441.1	163611	129698	243957	99690.8	158597	291384	74673.9	54440.8	0	305833	213293	169353	1.3042e+06	455020	71538.1	526209	515590	381915	188301	143117	122020	114710	75976.1	124746	110914
546.2857796249/15.6665	268162	142155	456258	186588	327085	129830	312948	537728	313743	62548.1	333632	326991	120814	87886.7	282667	187658	149730	174497	512671	460172	211684	405341	212323	115311	105715	175919	161599	322474	249958	248473
834.599862614606/24.5024166666667	5859.27	0	16126.4	0	141654	220082	1.14408e+06	1.46552e+06	1.29338e+06	1.28518e+06	74879.3	1.94018e+06	1.4109e+06	238270	296774	117094	1.30453e+06	10609.5	0	0	0	0	0	0	147522	1.21764e+06	891162	747380	1.36024e+06	744703
280.235726365071/20.359	305947	170675	305246	139022	408219	79631.2	200645	346123	87325.1	340640	422100	408302	672160	334527	328909	389543	320219	942959	273988	0	241423	294745	132555	92996	125621	355236	140666	151329	210774	118291
277.14748242621/3.0405	631969	572730	116451	201742	344830	458603	360670	345024	1.23842e+06	632328	417204	476740	255971	362793	356714	576511	670348	457483	332335	246736	585501	603079	710982	775623	1.15741e+06	1.16544e+06	585928	502104	1.13751e+06	429753
754.537463457764/22.7280833333333	0	0	337006	53187.6	764408	651689	258135	904175	1.42909e+06	3.84982e+06	0	205132	164503	0	224856	0	304520	0	122663	61193.8	0	0	349841	132666	992435	1.68124e+06	1.42756e+06	1.20862e+06	1.28891e+06	1.10949e+06
831.569284104476/24.07525	0	0	126892	400946	348799	2.60949e+06	134189	155249	172935	87997.8	2.50362e+06	998285	67178.3	357061	93966.7	65845.5	69283.7	0	0	2.33636e+06	0	0	42950	355804	520671	183903	144353	345040	165000	149466
526.315685226932/20.1721666666667	757623	412699	66790.2	35409.3	0	45491.1	0	455100	0	0	247551	268278	178278	410894	328140	105653	157163	445653	56714.2	0	4.17518e+06	3.47804e+06	2.14215e+06	1.47294e+06	823478	767291	94784.5	717420	196394	257115
370.295229207114/19	287086	284638	261533	272170	63763.7	253828	210850	286554	233799	270111	476414	465362	399162	453787	434963	528825	443595	477390	455091	510048	256371	221145	236442	219147	237159	189412	222033	181441	199307	160729
414.30186828795/11.5713333333333	128870	70169.9	59654	93429.1	221554	74485	69159.5	136059	45122.1	283087	482055	274306	142792	471272	303932	200762	222596	347659	413380	582370	46268.8	232067	151477	158298	136704	555121	208012	487898	103754	45452.8
227.138755439766/10.7425	334537	252171	292848	232857	319177	438336	293719	233483	440354	461676	130558	185955	354082	261810	279540	234791	49182.1	488577	267960	583231	216975	152398	124461	162515	123872	167721	109070	89145	396235	247412
544.341147603254/15.9191666666667	577891	1.27719e+06	552046	1.38264e+06	364643	913901	793635	206747	640638	285295	107865	367373	465288	137437	524473	659843	1.11613e+06	131789	352971	146403	846075	768911	615665	854871	1.3493e+06	839420	487732	540139	810395	581625
816.584931682503/8.117	376753	410382	408238	408251	427237	377335	384976	411102	368386	436519	364909	340463	312994	357744	334315	350807	318457	348880	327445	399963	410922	393910	393081	433685	373368	452308	397688	455144	395786	370471
87.1002520207547/2.17316666666667	1.15409e+06	844935	762621	735782	735750	148622	967389	142750	170237	144151	791271	1.27524e+06	187032	1.25894e+06	1.24116e+06	1.17116e+06	1.26323e+06	1.20528e+06	582669	811699	1.00753e+06	643475	1.11708e+06	146761	559235	135827	143793	598422	692556	813108
299.132578502578/5.0985	481451	377089	212989	284344	510263	490695	377712	259211	489885	393710	161532	180943	251306	158739	152850	263736	388645	143371	193818	187236	465947	466781	408656	563841	513487	472479	349443	408565	406580	256894
344.134334586074/3.06133333333333	494707	417464	205584	226277	495531	498146	376585	50749.1	351970	568788	363533	1.09416e+06	266679	606032	743072	1.45835e+06	965280	849069	246251	270090	300408	342657	485167	399918	108992	380355	193422	682648	168685	168001
294.101411927566/1.36133333333333	401610	407862	79182.4	169277	282979	450263	264981	200399	626026	410417	192750	231815	191366	148867	212720	532909	605488	248616	243846	187059	500764	526355	514404	618291	683158	592408	571285	623121	517330	410527
527.29748341214/15.54125	396609	612254	523868	996945	667408	571690	563597	359410	470025	86969.8	737442	869791	882503	534699	890133	716851	563667	244130	821356	741575	626082	468646	659207	473277	726848	510914	504711	590848	716547	699638
310.132927055235/5.26766666666667	84599.8	268391	108482	102479	324617	206544	209671	196638	207693	432370	226849	320080	305529	103101	313870	63449.7	501316	128369	261771	211517	43356.5	68888.4	253085	319756	253525	322263	218407	375862	241387	84395.2
421.315435020616/19.8354166666667	288557	227989	262136	254906	378207	121028	132768	179462	102154	242331	288971	494623	339359	413220	550207	329537	227929	418614	433376	338133	114815	123693	116725	73279.7	37176	59132.2	44164.6	48508.1	44792.3	24458.4
234.097542485221/1.19966666666667	195719	326458	66637.5	247395	227969	358213	297945	150845	425774	213057	248807	253238	187890	159742	270358	395906	520513	309872	272569	244091	202603	285211	263282	346340	445338	257553	284203	249149	206228	266301
547.357858969205/18.505	934595	903604	706630	694063	649819	625162	532497	503051	532655	601042	417136	388339	518928	360833	492917	460114	495814	549443	597567	397858	937367	873161	772771	649347	609445	604109	591951	613248	570227	639937
756.554002093057/22.8276666666667	0	0	0	175475	435663	242989	875051	702431	886217	3.65059e+06	174808	204228	374206	0	1.75556e+06	1.24191e+06	307544	0	0	140768	0	0	0	155333	1.67187e+06	600730	765664	620600	2.63231e+06	579285
509.344542928061/15.635	316274	294835	582675	409335	150347	200985	223136	262755	393025	215651	39402.9	45765.7	344375	29626	45442.2	82718.5	250282	83911.1	63007.7	54086.5	519517	270473	238028	406097	447731	308826	177206	165348	208093	202777
525.281841260819/14.4909166666667	138072	142658	294008	408810	230693	177230	199008	129902	159715	99684.2	230555	181395	478020	155617	187630	197484	214089	144331	172025	248638	241462	221020	145553	185448	317246	191537	118198	160691	264706	210409
304.175614195289/5.70016666666667	240692	140662	208862	156627	188988	145325	199965	329591	135911	243550	170610	160058	236507	179216	482419	196123	160959	483425	203203	145931	269607	227069	161755	337154	348942	275851	283722	179163	235459	179629
393.222453405233/5.866	300813	256295	257561	239818	368003	249238	489693	823445	331048	883154	1.15575e+06	553195	420465	670600	308564	669577	691679	624453	212923	400656	119521	139116	97807.3	109346	106613	145475	97657.7	143768	95061.8	33980
522.285535795573/15.5613333333333	183367	254762	350211	187560	172384	109584	130690	420695	130063	89802.9	365427	497492	440930	289770	450024	456960	442568	329852	649898	498452	80250.7	198822	111663	199154	233923	100664	90254.9	189681	124912	169130
529.204643033255/5.56691666666667	643141	272022	0	0	35013.6	172816	44199	0	363287	780363	0	0	0	0	0	832684	1.01226e+06	42850.7	0	0	525603	586981	552991	521084	397514	622994	475362	533328	492629	290000
547.350220456213/15.4111666666667	300453	344879	313232	319075	288325	314114	317912	251864	296087	319259	177975	178967	232031	138441	165692	215758	237465	146172	180491	177811	308820	329818	274568	298257	395402	338792	248745	295269	322374	274560
652.246188972329/4.96558333333333	366111	99429.3	0	0	0	16703.3	0	0	273586	400686	0	0	0	0	0	233333	416981	0	0	0	1.40152e+06	928946	701036	974116	829210	1.69013e+06	1.54473e+06	783050	894192	840487
247.129006532394/5.34391666666667	539998	241668	298189	176689	161665	187252	159665	470360	128394	378969	485010	180521	136316	592268	112289	294974	272958	480250	93065.7	203370	526709	522510	208201	134268	107559	124125	134224	291324	126505	71189
189.074637305352/5.98308333333333	221312	169771	287185	186066	196007	200043	159094	206070	159989	255576	261696	288996	133454	327558	255683	238903	270408	265776	125005	196552	240116	181896	210558	178265	128093	127205	179637	146588	151810	65848
246.243042680793/10.0475	220320	151081	142787	181889	155795	184695	156297	165075	148469	166514	196971	177482	136932	208365	205809	298850	52735	208964	226374	226737	59318.1	193615	164305	143693	6692.81	188457	157886	157480	154224	159614
261.132037945037/5.65	54318.8	338152	280669	69697.2	212340	55219.8	67293.3	315018	81289.4	298239	185036	64853.1	58194.6	185042	271927	59766.4	38992.6	134118	262952	80822.1	70802.6	230449	53883.9	395081	49479.5	659340	71733.5	644001	307861	85675.7
501.308796250866/11.4105833333333	327343	393177	132974	282826	297841	190134	346411	1.21516e+06	323967	69602.5	351520	219620	124576	898058	167418	161707	289059	572865	303712	391599	278549	300795	0	0	165282	441409	234067	385812	74503.4	110504
491.278115519967/17.8565	290363	292257	538266	800523	581808	338501	395015	537893	305239	191731	519834	543791	1.50726e+06	336644	775577	535736	620632	468192	772173	634581	39914.9	226455	27378.2	485956	588377	438407	291122	342838	449096	201151
614.162646284227/2.4895	879840	388586	435435	2.11909e+06	937809	889145	1.13877e+06	0	1.54406e+06	863897	5637.09	86742.7	326495	0	465568	143954	898777	1.00982e+06	1.80426e+06	0	214810	161245	156409	164779	208619	153125	115934	509600	0	0
598.36879415631/12.984	263054	261034	236999	291001	457543	557546	282221	476658	170561	567630	61678.6	27177.4	26407.1	119506	82845.5	70729.1	26373	22710.6	84084.7	26196.2	232221	76414.1	174525	188754	790515	1.6335e+06	590573	313069	169401	172400
426.322379785205/12.37175	286524	113004	43069	108773	204862	509991	172561	44942.8	91857.7	216542	185902	801672	306789	142389	507904	253705	205881	184160	464103	106278	104949	199649	150559	149498	236122	561720	216484	332972	61760.5	139898
351.177155308809/4.65166666666667	434450	204485	192887	153206	334219	212078	235220	607139	222671	509176	962457	386478	247831	587935	500930	506482	406016	530946	203038	333473	162261	178704	108829	113777	91487.3	169427	78158	147155	85606.9	25917.6
118.067247982711/5.75033333333333	248850	223301	271095	219345	267791	223452	241274	248044	217173	264897	278162	283996	185367	355055	303085	342727	275522	251858	196698	214482	215826	211702	235901	186714	173109	195394	190556	212551	193070	181300
482.294613268503/11.0133333333333	466871	1.13765e+06	678325	922229	895796	1.28865e+06	990005	324162	669102	38244.8	33221.3	156223	113495	38806.9	101974	118763	151769	47696.8	23023.6	0	165040	59533.5	102308	44460.9	77844.9	1.56898e+06	505417	752690	139523	593944
756.554816702429/22.1895833333333	0	0	0	514343	503388	541607	985383	1.19357e+06	727622	973844	202249	772227	485948	0	407617	461216	2.22812e+06	0	0	168888	0	0	0	196821	807918	636505	732146	875173	470115	634751
739.535511929821/8.05116666666667	89178	143636	139383	149744	161207	89687.1	114588	132007	105505	149278	154789	154097	129889	141711	176069	156091	113802	0	120606	222667	153799	143139	139052	192707	122424	226500	152668	178838	162405	126527
246.134038439993/3.72883333333333	1.76513e+06	1.35343e+06	474270	652024	989656	1.64508e+06	1.06575e+06	234645	1.82635e+06	1.30935e+06	656316	452192	722811	471436	430311	319027	839280	496396	694572	573386	2.48911e+06	2.47172e+06	1.92285e+06	2.98465e+06	1.80752e+06	1.23938e+06	1.59818e+06	2.34087e+06	2.10793e+06	1.01182e+06
415.775179471039/8.11283333333333	251911	313657	299407	311476	313357	263571	275466	303750	263940	312648	108333	101912	101136	99468.1	118010	105357	90278.6	88339.8	106906	133867	341286	347030	301780	408039	323056	460980	381571	403341	371542	340886
205.085846951999/18.2226666666667	333410	352480	216904	264576	283710	55618.6	198349	322360	216650	218038	334815	263773	230149	280992	283594	258655	220653	534120	329339	71731.9	330386	346677	274664	288954	330958	276975	270480	271954	256225	271936
236.168037915148/1.199	218096	125794	239872	113300	369786	169610	177814	281023	116107	323148	16739.5	85749.3	22567.8	44269.1	62428.1	153001	32102.6	96600.4	53886.9	15964.8	65547.9	39381.5	105526	59934.2	73056.8	168659	79896.1	277551	331564	157460
392.150318605779/5.51633333333333	87301.5	306410	171882	422674	252281	216911	158301	39967.2	146051	71602.2	240864	375142	510100	253533	232985	424456	278753	49583.7	332455	46867.8	164503	303307	389349	134458	320492	237139	260762	338064	691728	322943
642.352807374635/14.6713333333333	402208	257160	208299	370521	232609	201458	224295	213673	292078	178178	206752	407008	681322	135411	414275	645998	898860	232823	248633	309439	293690	229014	196536	421425	297011	413558	174727	160235	195721	135415
704.57815105887/23.8816666666667	0	0	0	7.11054e+06	110481	200604	383388	135442	633453	807989	0	330764	567855	295085	1.07663e+06	603529	426399	0	0	4.26147e+06	0	0	0	306869	639172	948769	693032	990494	980412	1.0266e+06
134.034822804151/1.84883333333333	281573	243903	322068	255973	286984	251999	247622	73519.8	222582	293025	316811	333497	277341	350035	280262	292085	147729	349207	264969	283312	194610	203253	226355	181817	155396	171992	168773	51439.7	175777	46852.3
237.221191236984/21.1068333333333	644429	376419	681970	0	0	84257.6	267844	555409	221796	610872	0	75196.3	230032	0	132735	173899	160968	408625	117305	0	491625	711769	321228	0	157158	427460	240910	241683	382599	233039
779.540790877565/20.989	0	0	0	886542	345158	402445	386482	1.64747e+06	237155	254260	301935	459409	621892	347369	1.29021e+06	594688	610890	0	23616.7	818069	0	0	0	1.54112e+06	707509	519010	419363	183260	260806	286084
527.159741129011/1.382	1.02598e+06	178146	0	0	0	71855.5	0	0	338130	240650	0	0	0	0	0	95547.9	187559	0	0	0	516530	463569	403285	507194	457322	674977	545098	365086	464766	694746
848.304102502294/1.78408333333333	181722	107875	0	7046.66	17746.3	91314.4	59232.6	18299.4	134497	170347	0	0	0	0	0	64119.5	148871	58123.8	7396.54	0	948449	462788	393064	302417	368871	773311	1.17563e+06	370363	382249	818366
282.252827924908/21.6221666666667	656238	379519	655005	0	88480.9	0	242556	350849	174748	219490	0	0	375493	0	470503	378638	295038	851548	257320	0	547831	485792	364059	0	86453.7	235020	183504	216432	143565	146124
828.55162374987/23.5341666666667	0	0	70914.1	459806	726304	733007	429733	62310	288241	545688	3.15717e+06	612574	507535	0	664267	534548	484558	0	103142	1.00402e+06	0	0	192796	613790	760989	520303	574994	399210	413005	458481
781.555947680679/22.656	0	0	264700	0	621765	556577	335572	644287	273723	477957	127962	175466	1.38591e+06	565731	85664.2	1.87361e+06	2.30128e+06	0	118390	185772	0	0	245400	0	560443	495270	540527	191115	785601	503775
688.346360179549/15.1723333333333	46145.6	64800.5	0	79807.4	90392.3	64213.4	73843.1	302265	60085.6	408886	599833	676087	879617	436812	1.14547e+06	925934	171878	753208	91915	737915	37123.5	43180	50115.2	54558.5	89894.5	75046.2	298000	57362.5	83757	21788.6
295.14864632384/1.382	599967	667462	348304	475523	1.12672e+06	1.24839e+06	695995	506906	598746	791430	778047	737962	556097	790784	797007	1.29205e+06	1.10332e+06	1.06803e+06	678214	724930	486447	428926	529545	449129	437373	376438	289028	422923	356315	275153
114.091774001845/8.11566666666667	150952	241397	220864	243728	256131	171858	204047	223301	185547	265260	263567	240999	205303	248988	265842	244079	186346	206302	226710	423737	241383	227030	127631	337231	208646	385594	237705	320136	268010	217389
584.439553840922/6.97466666666667	125646	155732	142336	104595	187612	135057	72389	147423	128142	161841	166005	146214	168688	158154	193244	111830	146587	167314	135130	285177	119337	154924	111344	238700	164410	313225	124062	210633	195355	177553
314.113679314036/1.91616666666667	407170	364244	115294	200923	362213	400476	291181	241569	492156	390836	232087	280663	252367	198325	238159	444648	552498	327898	268666	250578	368382	455282	399958	461825	500977	457549	413244	490052	369919	301112
205.09617194405/6.37883333333333	127073	101308	124542	84699.5	33119.3	105242	35703.5	43630.7	110867	135375	68817.9	95338.4	27901.8	88197.2	64261.6	1.67073e+06	1.40952e+06	123377	23686.3	45132.9	97867.5	1.02491e+06	1.22052e+06	65342.8	43677.6	101625	41844.9	73613.2	52229.4	1.79802e+06
548.362608783539/16.1686666666667	367408	310390	260964	292292	103686	267669	229726	119240	334206	183678	54609.1	128852	69496.5	26360.4	100030	296383	358770	72099.6	90468.5	105700	436537	352762	224197	466694	403016	261688	182640	197504	260887	164418
213.123243941357/2.465	621491	1.33063e+06	387825	580137	741045	868058	542342	390635	1.12251e+06	536608	637914	655889	316994	740535	276555	503003	881757	752149	522675	1.10407e+06	1.18492e+06	730223	416463	232542	526768	438255	297241	443505	260336	165014
571.350374622354/15.349	252949	239565	163745	178096	288283	415793	236204	225274	169741	242710	299845	241001	167785	277144	287746	257408	157390	269252	218260	282255	170111	242274	206762	130588	210290	256633	155318	278656	258732	168342
995.686485066468/16.10375	256535	0	452125	356629	276243	213662	223680	328312	226465	231561	190831	101667	513295	189170	148299	144313	254758	212191	178155	155352	296193	242524	257487	269212	301221	270662	220868	240324	253148	269393
466.330810088463/17.1548333333333	334538	281168	828098	313987	310743	206955	184604	1.04276e+06	214493	342376	161719	167325	247482	292321	211172	144850	116362	171157	184921	112283	382579	276241	238386	189423	121671	143779	23231.6	212959	185630	143635
474.16589705133/2.02466666666667	447650	267766	0	0	0	181268	26059.6	0	448516	458347	0	0	0	0	0	412948	625850	0	0	0	696863	762953	619919	737292	620314	910567	703565	711561	592603	110668
371.145910646446/4.50908333333333	600048	473392	89822.3	183251	391736	607181	317400	122907	543132	438431	179118	234362	249246	156884	186697	336721	636275	228671	711394	206571	246736	341432	261226	747829	433872	427208	380447	664637	241613	328185
935.611095743833/17.1503333333333	83099.3	68984.1	960557	218718	69141.9	38176.8	50068.1	433453	54594.2	85889.7	92885.7	157448	1.13174e+06	301072	118463	141750	132870	95212.1	113074	91468.1	146078	68882.9	75637.9	109593	120701	69885.9	37895.8	23594.3	37151.7	42366.8
491.196569955773/4.979	795578	369369	0	0	42978.7	225569	59667.8	0	558350	881871	0	0	0	0	0	737673	1.0391e+06	30833.1	0	0	896626	932733	778231	908243	755280	1.12728e+06	846707	844912	802814	496423
310.118798868663/1.36041666666667	508378	498325	203814	304467	532611	562102	435838	330431	424687	583893	398963	503524	219526	575310	334846	1.10207e+06	444207	449995	823708	547438	223446	222083	250786	305984	422451	294975	308573	314951	293453	284647
735.589359563159/12.9415833333333	322535	202237	79595.8	115560	49934.4	14418.6	0	72774.1	0	0	108627	129931	57108.3	251848	74514.9	153662	90038.4	169660	217553	187937	155140	273616	237768	223219	239117	336618	199606	324248	87026.8	65383.8
434.318149882961/12.5406666666667	258859	147673	130539	327200	516466	268515	160331	164083	209123	305141	82898.4	215060	102839	58833.2	185762	177110	180263	82137.9	87778	50800.3	11550.6	241754	187049	188973	276016	816980	308435	696219	175264	178555
605.30962366616/17.2621666666667	217752	515385	0	529558	233024	414993	339214	13056.4	624156	102477	111200	103663	165858	78038.7	284276	207832	539106	113898	669034	271731	320859	208834	460436	838733	1.01136e+06	302089	383883	286823	450459	620716
221.185787510871/1.28183333333333	460584	455123	1.41925e+06	644970	1.24555e+06	518533	725727	1.46479e+06	288274	532843	444769	718000	550799	776862	615200	453466	149809	744957	587622	552416	42903.6	75817.3	128755	82303.2	54691.2	84562.6	54742	294051	181419	70885.5
520.875480175059/8.40033333333333	192786	251857	248432	262880	230844	187860	242833	264639	204272	238400	161378	169200	159894	134151	186522	156233	120856	138493	143649	194285	297758	291757	275890	328132	260879	367629	305945	332764	307985	284535
654.228803469455/1.38933333333333	337849	113060	0	0	0	39014	0	0	232264	273440	0	0	0	0	0	75335.6	237536	0	0	0	1.34225e+06	810726	643270	686512	715925	1.1632e+06	1.41398e+06	682956	722693	1.09698e+06
524.30031693872/17.2791666666667	420005	267712	811841	322066	312194	218313	259361	970829	301290	430855	274007	259365	143925	255077	225885	217074	79314.7	289818	284496	331364	299956	56742.4	246262	210998	218588	309510	179711	305467	240159	195768
522.356668887412/17.47125	553301	560526	758729	577450	265400	297371	262091	331265	318589	258194	21317.8	36654.3	219995	22218.7	46696.5	81712.8	148454	130284	355562	56575.6	821944	550550	355667	510799	473151	2.59639e+06	2.03181e+06	568310	271072	212123
450.313389317056/10.8436666666667	310986	159589	129547	255216	500197	232605	174914	294493	180330	432316	201568	310915	271807	188294	335933	244668	228730	230284	317320	185375	151304	232259	180517	162288	250212	579298	268843	568655	123545	114556
476.273362248741/14.2898333333333	705910	196357	248683	358655	277735	319873	309919	322195	225199	449203	345926	541792	353800	441867	500289	489877	202844	191594	201217	394406	343559	266411	282250	198930	243570	175958	271648	224621	291979	337847
349.767034194518/7.234	142402	163815	164176	120159	217675	129473	88697.4	169565	134815	190376	175120	136723	157999	164363	184633	99137.7	132470	162867	147237	316714	156269	186494	139957	252792	164135	320784	139854	200119	216858	178266
229.216155783251/20.623	471214	361212	454638	281378	345067	234441	200088	456694	229419	406357	154934	19992	122327	0	58257.1	69656.9	89831.1	214707	100147	151951	401312	610501	267060	381760	300261	345357	213531	258054	320303	216813
483.855620486991/8.33383333333333	107789	169223	163162	166931	186917	109194	138331	170838	121161	180105	183523	170947	142048	165405	200820	173306	118799	0	152132	308070	190805	176808	175317	260858	132032	328926	198486	230384	197056	147225
644.367877073506/15.9088333333333	379620	371677	458087	412884	344342	267366	340102	669359	510306	601263	187655	250915	799415	182767	266132	497178	725224	306468	236434	270852	336276	247660	224562	545158	362134	389390	239975	184090	194342	159779
336.167920055227/7.75466666666667	210893	130096	180982	246082	227422	134213	107327	289151	106956	162406	143862	293247	392784	202159	328880	249799	143316	164654	245349	158137	103636	111063	107484	81654.4	102944	89836.6	114977	97988.2	59558.3	89167.8
368.316953489209/20.9605	327955	252817	703518	74387	32055	114309	113332	216111	72956.7	386190	0	292077	459530	0	309375	243054	109076	374329	252817	180258	33927.3	182484	142712	5880.5	66857.3	91288.4	51750.6	33154.7	82242.8	36351.5
326.124205076114/2.186	242999	233581	229577	176853	325839	271250	292020	264803	231283	354268	2.21047e+06	2.05844e+06	291740	631510	294284	668680	627192	638979	393371	383046	147746	257610	250156	321436	417536	345576	333479	377939	682438	437439
769.561794746673/22.3323333333333	0	0	0	210998	670095	510028	866829	641218	403554	780096	0	848116	1.28219e+06	150343	832682	676247	1.09393e+06	0	0	0	0	0	0	132478	789625	1.36718e+06	2.15551e+06	1.07939e+06	1.40756e+06	1.37473e+06
339.273477320889/19.03275	103072	95760.7	145134	147663	101947	74617.9	71074.8	107398	42729.1	72128.9	369255	581789	597217	457839	642043	373876	209621	419752	455841	378205	50296.9	46377.7	61950.4	51581.3	27367.2	33477.2	40952.3	39659.6	39097.7	23169.5
624.396849716349/12.478	579953	335638	0	0	22539.7	188785	60544.9	0	406293	514067	0	0	0	0	0	409736	632111	0	0	0	669292	52981.7	583603	722261	600152	1.06191e+06	894569	692816	652688	447305
453.281859974957/14.5426666666667	134989	70495.3	714460	397900	110833	111535	132125	284719	235645	100346	74017.6	62783.1	631864	61877.5	55391.5	85366	157547	107648	77314	76130.8	340831	129037	141337	261119	292658	133058	112660	92178.7	66288.7	209731
138.052029821056/1.25175	56752.1	126568	250883	204205	206322	115364	200978	263919	101392	70036.2	269483	243539	306810	290155	255560	116673	93577.4	98562.2	191804	298181	41070.5	51585.6	63337.1	57163.5	53616.5	47569.4	42255.5	57549.4	46849.2	40717.2
431.224599503507/6.45	278963	23839.6	539108	253332	279031	236723	279025	768162	224741	180151	169474	49958	137117	126823	58374.5	34927.3	42573.7	74301.8	196532	140705	186237	241619	110444	115867	94995.1	161755	161096	223834	212630	102122
776.215305141791/2.91866666666667	364530	575600	115184	422491	554172	741031	519122	90610.5	710015	559628	167118	524343	529645	0	966165	1.24435e+06	1.42836e+06	291196	1.43576e+06	101871	343000	540836	557881	495761	648314	488797	552952	584335	540766	423363
778.537074885536/21.7031666666667	0	43395.7	53006.7	1.01463e+06	252495	178444	489847	460926	373994	834236	173002	264938	339584	0	2.47975e+06	1.18401e+06	1.01273e+06	0	73619.8	263524	0	73227.1	55493.8	1.21209e+06	125488	312378	292509	520897	247596	222681
431.297022460191/12.3678333333333	269285	83382	31189.9	117232	581046	182913	111472	347973	108463	505247	34818.3	249504	126274	324266	103742	132653	119943	164465	228829	158325	8353.2	162589	10073.2	66262.4	92862.8	480918	142842	367179	51891.6	81257.9
687.254776227331/1.56483333333333	667311	221436	0	0	0	72425.9	0	0	447486	604600	0	0	0	0	0	241552	572822	0	0	0	1.93833e+06	1.46189e+06	1.34329e+06	1.36747e+06	1.22541e+06	1.88092e+06	1.93886e+06	1.35914e+06	1.43069e+06	1.53947e+06
796.582678769052/21.339	0	0	0	0	0	572476	450943	1.60425e+06	565873	508496	30628.6	1.0524e+06	4.89298e+06	3.59301e+06	311205	155494	6.05202e+06	0	0	0	0	0	0	5689.2	455875	924888	477461	352757	377713	275385
457.307496422812/17.0830833333333	84725.7	110922	111550	109475	283156	118656	105383	92168.4	63794.8	103796	342057	526130	222940	560429	557085	353514	155142	290945	392780	395092	61098.7	50740.6	75195.7	34381.8	35927.4	50898.5	48218.9	77675	66879.3	35063.6
318.12848240629/1.37516666666667	555518	647004	112777	390176	473801	773923	694153	349897	434697	465314	773878	455804	173518	311669	395299	1.37198e+06	710072	471160	529518	346317	338000	486958	591451	352534	364432	273969	287972	456530	435691	301861
184.073157369377/15.6988333333333	265506	285068	467096	395423	271907	220937	225412	318971	242582	234921	181996	128492	558135	167501	162753	185469	317590	169704	164467	161774	289759	228536	245581	293855	329257	292823	210031	233958	241133	247197
512.361885953022/17.0191666666667	246926	272424	567738	445348	197813	210542	251286	247431	329977	200885	59841.2	72312.7	459437	68864.8	67016.9	85907.4	233031	134050	82615.7	45264.4	343998	209347	327375	376397	455129	264048	165688	179038	262111	293494
184.060078324676/4.04216666666667	551173	369691	850660	406805	876129	349353	347151	378993	476477	446477	450358	1.03263e+06	865587	1.20013e+06	1.50759e+06	961809	508136	300301	1.13186e+06	891620	309362	230418	474713	262523	249470	471586	226956	120568	279454	288999
343.286351162334/24.535	0	0	91565.4	239979	236556	325303	245087	332464	284714	280108	0	251729	187783	356956	319097	267703	259109	0	17071.9	186798	0	0	243768	340742	414958	467604	434257	428404	590445	651852
370.278586262337/20.988	524579	319791	2.90883e+06	869956	1.54425e+06	186463	173833	1.54638e+06	263329	644862	263634	287212	624676	669766	297914	211977	108398	305198	191655	0	269329	333490	193504	95632.1	120699	87890.4	119942	85861.8	191755	65592.6
423.199350312753/5.94991666666667	210332	166086	115520	117576	304675	164118	116100	229323	165853	235563	246675	416482	169783	323705	343627	541804	321046	483640	361978	315025	71045.9	93480.8	127698	118290	94077.7	95863.7	94267.8	121692	102379	62973.5
345.265349576003/20.6220833333333	534246	279606	2.90661e+06	409145	0	126551	108276	884651	93743.4	411391	0	197064	245481	300634	200953	163233	103726	271390	122865	0	290076	389204	193867	119501	35794.8	74043.7	92332.1	87671.5	146452	50367.8
448.326251215844/12.3065	21985.4	347394	90608.4	164374	161963	311715	406167	137429	463613	816187	63818.1	236909	147681	68251.9	404080	450872	334224	129013	181707	205690	224920	216975	255447	290025	374415	266020	298418	211765	217783	170604
460.203621307086/1.32916666666667	780646	357381	42029.1	0	50556	280265	79095.2	38523.4	468852	504643	0	0	0	0	0	391686	478385	29346.4	0	0	684449	916067	637051	794602	530036	888780	856936	876483	733554	856217
757.558349774438/21.6625833333333	0	0	0	433380	529937	377185	813542	635745	539699	826687	312801	783431	1.04369e+06	0	1.3195e+06	1.47449e+06	1.73007e+06	0	0	271630	0	0	0	317810	307438	488373	440704	643812	376049	326877
195.122423764431/5.1655	75652.2	285370	249711	140002	226503	78219.5	81958.1	280084	137781	245820	211273	156309	82148.3	220330	335028	89280.9	71705.6	150609	248258	216021	107151	145642	70866	282710	55558.5	335363	90954.7	423735	185587	86268.5
137.07766459809/2.24966666666667	302848	229536	237588	225889	226882	238338	252206	212816	221379	231890	205576	180538	269413	226560	155059	190231	207862	284843	231931	214554	247552	271084	278146	280990	282354	315111	314535	195539	382660	345921
380.316782214533/20.8613333333333	105642	108332	156253	111543	249421	48065.6	60148.6	67657	25059.3	49570.7	262396	659478	558109	430627	710083	381712	204730	472639	487247	8052.36	41889.7	42077.6	66122.9	43916.2	0	22360.2	25713.2	7267.59	22564.7	11260.3
339.52703221479/4.4995	340790	228084	389814	103687	321847	245603	263077	342345	162682	199217	448920	65828.7	167608	384127	54597	33855.4	70756.3	172165	155208	261969	138677	158414	89416	54526.9	32448.1	157679	133433	116111	196665	27348.2
542.322879375801/15.4093333333333	272490	247536	409434	668264	235315	250743	234886	231477	280741	166240	247913	303815	404221	273706	286342	249429	236249	307622	313446	261460	233192	300384	293333	315466	203141	232464	328123	242738	241604	366261
320.145087824481/24.774	1.03515e+06	1.18648e+06	424470	977778	1.01598e+06	797215	504895	669835	700305	484456	514064	355733	328524	480544	465542	364620	395106	324810	682006	110462	43960.2	46142.2	718163	1.23818e+06	1.16132e+06	1.01967e+06	1.0563e+06	856126	899360	1.08452e+06
300.108349619871/6.61683333333333	271562	572652	338307	748737	824690	637331	360818	143836	477215	164121	271683	981009	1.11333e+06	127413	1.00636e+06	642643	781819	331938	1.17037e+06	586201	283238	257259	369148	528073	724882	477245	430786	339373	362844	407049
621.304916005191/15.9223333333333	23417.8	333309	0	613541	703719	474352	167428	11758.3	725934	240510	362167	106489	275834	85892.3	524091	189036	522974	31846.3	825749	343897	238374	364590	57946.4	283681	295217	208313	263916	189295	337102	643867
120.066549573305/1.20175	247482	279196	291309	279408	233327	259319	324624	279912	278467	261216	292914	279816	250838	278269	237511	213866	244767	272004	240168	255021	248784	249578	265309	225611	198593	179101	234449	183000	194588	196987
726.406253926685/8.7965	267127	144218	150175	66844.8	138954	88440.4	83558.7	125761	65575.7	205617	281295	681423	94655.5	664777	333891	666634	316866	580640	86164.7	318621	106805	49415.7	130133	26004.1	0	29139.5	63783.4	50349.3	40000	0
630.362903990553/16.395	211271	139827	276480	160591	229825	140078	182669	577412	208499	228347	601733	575865	1.27484e+06	884194	569751	811234	1.34531e+06	526703	350831	420603	133918	129967	169319	242361	254718	209302	197168	116886	147438	119211
532.337198706874/17.005	257775	245114	488048	396827	386593	252470	320633	242159	310706	192835	61004.1	85349.9	296277	70887.3	71826.7	90722.6	206520	177195	91823.8	68674	453674	339659	767488	435882	462159	314736	367804	245905	355708	302014
380.096306974073/1.214	154990	366378	58883.9	325207	417990	356128	276203	135361	206553	63566.5	124972	82561	92905.1	40628.9	178005	115113	93171.3	269623	463552	212699	87240	117919	127222	28350.1	188448	52838.2	77500.8	82647.3	66729.9	84195.7
277.21662667008/19.257	195796	166544	279180	213063	488561	87489.4	190190	248700	21268.7	149026	728844	103125	210124	436222	156487	190605	40898.9	308272	83711.3	235449	67494.2	84825.3	91700.6	95100.1	152813	405700	102373	127465	182132	41857.6
706.539260477434/21.1271666666667	0	0	0	0	897539	1.35529e+06	1.18919e+06	1.27207e+06	684939	827146	0	86891.7	335339	56109.7	0	0	49683.1	0	0	197466	0	0	0	0	522642	723795	643099	397497	844837	913807
409.163003759809/12.85275	188275	190616	257352	206259	174485	221836	189359	136228	197495	235053	153298	182624	230096	125747	169656	155047	133686	157161	140660	139369	226337	190481	203594	198058	251458	195684	169931	189434	256545	273280
757.55698916118/20.5439166666667	0	0	0	453101	597787	149186	398278	720975	489660	1.33174e+06	21781.4	1.93913e+06	307914	19141.1	60418.3	525277	475328	0	0	2.06016e+06	0	0	0	346022	143801	381575	445188	637770	631920	573098
190.076259805334/5.766	316971	265152	304406	232527	251775	270006	217784	295845	244705	344185	306162	388107	213202	407554	301121	391304	343801	346772	206373	270347	267324	255543	301485	228413	183901	189866	223786	248681	223223	186539
400.28579398394/19.4155	105591	157468	133030	192462	0	111238	96291.3	93681.6	73275.8	86657.2	189757	571480	256833	402793	639328	358296	197687	268973	386087	326826	80715.9	77811.1	96217.1	55908.9	46738.2	48277.2	44528.2	59549.8	55880.1	44120.5
345.138049350076/2.51516666666667	483664	426031	284177	527091	1.216e+06	1.14855e+06	577609	537145	809290	761057	675136	853166	498403	862781	934220	1.18657e+06	1.06674e+06	1.24566e+06	838896	397606	255226	245267	1.32201e+06	355484	526374	443016	337144	235440	204859	203042
213.123193306636/2.815	1.3592e+06	1.94333e+06	967392	606377	805640	1.02151e+06	687979	845584	884095	2.88549e+06	523167	1.14274e+06	565091	1.58807e+06	512842	2.22291e+06	798503	3.02143e+06	525358	483286	960385	493417	2.10733e+06	620988	542434	733442	826871	505096	1.6186e+06	469105
253.216051456322/19.72625	180999	132850	272731	129624	188016	89755.9	147583	238416	66881	161082	602366	174657	573603	575048	160164	202183	114509	504363	112096	0	139353	188239	71076.7	152564	142185	186520	83458	97820.2	119810	89865.8
543.328678621414/14.3949166666667	240707	298617	346386	340728	95002.3	133993	128891	101342	185938	63342.3	108754	124246	539301	62957.3	120085	204823	381262	43125.2	76004.6	93452.9	504807	172447	180913	316494	505571	272907	117525	89045.7	213603	148497
506.325603522783/17.237	154737	138838	380285	254888	73212.1	93299.2	98803.4	192539	132709	105833	208828	333473	818977	308102	247234	423459	629887	276906	329822	360696	177680	118069	83735.2	136962	148696	77439	70564.9	73633.5	114629	98692.8
298.27449153915/12.8983333333333	420473	413302	479025	551442	261525	333430	471513	239214	398110	232340	130160	275328	300800	120209	220290	315665	257196	90844.7	197410	177873	645715	155926	531756	494221	460689	328400	402548	348846	383769	486527
181.122190902796/11.9238333333333	485506	98383.1	83989.5	45424.2	71197.9	60448.8	44559.1	236454	81626.2	104697	380844	432349	350261	215689	353351	431866	392697	393484	280727	378572	83434.2	57363.1	49054.3	46169.7	65311.1	98208.1	53731.5	37409.9	34363.9	23974.1
556.298082382448/17.05	533456	578492	148209	233844	390468	381758	183790	277091	288284	0	484577	273782	431979	448196	426143	285270	303022	357635	551748	367465	620015	303520	483546	691532	338010	325928	552598	426241	436600	500608
545.342192993237/16.737	577095	526064	403679	481656	494272	801575	474454	456247	461165	430309	344021	300914	387022	302746	345941	350322	433361	462520	348749	328060	378551	1.06766e+06	530711	972352	313628	545654	477734	499308	511607	443605
463.351726432776/7.59816666666667	129606	132654	148932	102124	177790	102237	78497.3	96337.6	113694	163792	158326	138401	139384	148601	168342	101499	109309	126389	125710	287103	156912	175177	132640	227209	139442	336220	146628	168948	191132	140104
637.507512248756/6.01683333333333	40558.8	86972.5	111426	171017	158081	201189	365883	140928	370536	321004	251175	672770	331634	288904	358064	378491	453279	83901.5	124188	192121	42266	24357.3	49872.9	28937.6	27038.3	74336.4	67138.1	50410.6	39176.6	55012.5
134.033633061845/1.37816666666667	275967	396305	332668	181030	275259	314242	284902	355936	387169	328148	391568	426665	372368	457685	432774	541168	607062	254947	821996	435786	312144	256151	363419	231512	214780	275463	260502	259661	239339	233630
179.048480843477/1.88558333333333	35827.5	255402	69529.1	372052	149588	291675	217591	0	301690	75849.4	0	57498.5	140172	0	136880	108778	119560	11470.1	48274.5	0	310697	100437	312097	330670	390060	236473	354423	169348	270174	397296
529.302849993085/15.2685	201569	205268	37765.9	250829	235752	201242	212400	171977	165028	157187	260191	227366	227478	220860	226793	218709	178552	216042	199794	237244	199665	136199	188030	160698	238556	199414	165561	218758	232960	204476
371.145799126159/4.88316666666667	394022	411120	255997	424573	673657	468043	399662	446046	432024	442440	525612	586333	713387	600607	820394	499575	611012	674686	958807	534927	216623	213837	154104	348846	313629	301036	264852	231664	205139	216810
727.564279043123/24.4783333333333	0	0	1.78288e+06	464602	320989	369597	242581	380780	187260	214576	0	337400	119369	546081	401719	338257	113630	0	0	180486	0	0	418055	251061	296191	284162	219764	240639	244443	222785
804.55238646086/20.5688333333333	0	0	135715	379967	1.64014e+06	296311	198087	260693	445619	168964	196600	137326	221262	609288	121514	237211	177797	0	89144.4	1.77493e+06	0	0	94264.2	1.9647e+06	430470	337689	201167	762038	364898	172793
358.263125152412/21.772	348637	435270	981102	131008	38168.9	37938.1	169276	185976	103544	175718	0	29847.4	112649	68450.4	175551	173750	80557.2	315323	193244	0	523921	341180	331838	0	6066.63	172312	167750	189931	115499	75884.4
698.526190440976/7.234	136632	118448	140808	128541	191821	144663	92209.6	137855	139636	145481	138403	165007	187738	136667	139418	134543	161408	181806	127803	330348	149886	138600	143148	158086	172868	143737	140258	96483.6	156498	172082
626.450123267303/7.86825	77670.1	110641	111376	115073	124451	81905.7	104792	106649	80550.3	116190	131268	122904	103119	127508	140926	134928	94855.4	0	104285	203119	131356	118758	119323	154304	96749.4	185725	135579	138752	124883	99097.4
496.331912838195/14.6555	227156	265904	395243	357027	164702	178276	192173	190090	270446	172654	61858	43675.8	424784	35352.2	63851.2	105340	254858	113564	87305.2	62367.3	403673	220770	197534	283821	415248	241272	141626	173226	257767	222921
523.350168457087/15.3643333333333	221114	225814	303553	286564	172713	194190	198824	220915	223411	107114	214759	251776	424677	188748	249598	306494	450665	225285	218973	246124	311341	231636	183350	293139	225131	218214	209407	161514	166266	167992
427.313723011838/8.21616666666667	98023.9	150969	144622	144927	164898	99741.9	121730	150218	97394.5	160580	155480	149365	119201	139035	166056	138041	94275.6	0	135587	274139	176358	152691	149220	219932	125548	287531	170296	202605	178815	130177
184.073185217665/16.3526666666667	335907	392166	359288	391044	225960	332546	293817	233531	385353	239632	70172.8	56433	233835	31952.2	74485.5	142569	272568	61258	62152.6	80697.5	936421	660051	288999	409287	443415	368697	269782	291789	306032	527235
692.36870470885/15.7363333333333	513025	483504	115024	881044	447403	413590	524201	743954	377906	914343	68176.7	154314	101517	61368.7	110434	194296	324172	138044	65910.7	107601	190139	305777	285294	322358	816857	548427	228944	347441	335100	187303
356.268020711051/12.3756666666667	213409	69766.7	32383	68774.6	129068	393955	65149.6	75147.9	104239	77186.9	115233	719289	199769	86733.1	383407	142327	117532	121303	361400	64981.3	69131.1	65897.3	96943.8	96235.8	187656	578779	179558	271086	36340.1	87970.3
184.073192927965/15.0755833333333	250418	288822	213970	306050	234596	315224	258876	168166	247811	186088	141554	129456	363652	100437	177759	304005	579177	107770	117005	161555	385668	288053	206733	301416	352197	301177	199455	213253	229919	251631
725.557799856109/20.981	0	74667.6	3.73634e+06	257054	90722.9	0	26336.9	61371.6	5257.4	26440.4	22096.8	22914.4	61447.3	0	111098	35169.9	26864.2	0	2.62755e+06	105962	0	52339.9	2.15119e+06	260940	65020.5	30718.1	19578.2	0	18205.8	11122.3
370.278971688921/20.5256666666667	601315	293396	1.56395e+06	276683	547958	150455	146201	2.1582e+06	218435	982179	162937	473101	337119	392709	347226	376200	116677	296615	433382	123401	227241	400476	186664	88825.4	37382.8	87936.9	95965.1	106997	154634	67562.6
308.903348068573/7.6005	127148	133024	143387	98493.1	178745	99094.3	82416.6	152777	104471	160530	148284	122887	131500	142242	161635	84854.8	93729.9	138514	136714	307648	172842	181806	131269	234464	139955	367523	143559	171496	207965	151120
573.36491011501/16.4370833333333	412260	370993	246557	301455	329233	294586	299807	319319	206403	454313	65059.9	55739.9	99401.8	76576.2	75809.3	104801	117482	123605	82594.2	110820	250017	319791	247205	226426	228519	335169	179029	306027	260010	154378
239.102885199521/7.11533333333333	123187	137055	88372.4	113320	238813	140415	142602	55408.1	137082	95191.9	103318	155284	105065	99381.9	198856	180707	59939.7	72886.2	107778	124638	210445	166748	254044	144054	184601	173314	170002	228067	150862	153439
621.555141018617/19.905	214659	286447	516621	427321	0	134121	154824	94689.4	115001	88352.7	97698.2	140013	145148	140867	200990	63736	67657.4	159285	170760	114751	329864	173602	226103	214063	129470	77484.5	45880.1	49836.7	66811	36959.9
703.500968726823/7.917	270264	300835	291091	290572	304180	273963	279123	306424	265906	323274	258725	239682	231647	262766	244776	253709	228348	248633	240957	299067	308803	293163	292945	323559	275678	331529	289389	337436	300842	275700
854.567873852295/20.522	0	0	12385.6	118948	1.88869e+06	520690	233602	521471	302667	442484	345377	310481	388294	452283	0	179862	461284	0	97974.2	28915.2	0	0	10844.5	90680.3	145775	438864	359041	257893	395500	162713
527.318601563472/19.8065	811368	586082	1.27181e+06	483158	430596	246000	232985	915555	286192	358150	407871	402720	111983	611399	481266	332419	236265	797307	838353	538483	1.10025e+06	934054	566166	368845	278279	352561	340712	392363	259524	342606
779.540712889704/24.4608333333333	0	284148	2.51561e+06	499871	204227	272835	81859.1	161168	84068.2	78302.9	112509	45989.5	31797	0	95791.7	58954.8	6657.18	0	51168.6	148165	0	185515	2.73712e+06	458570	162148	85678.9	73797.2	79591.5	119470	91213.4
432.908997890432/6.634	125182	116676	85304.5	90562.6	133306	150774	297130	218925	270805	339831	389534	387962	112864	248621	134139	173658	275512	235318	176199	189472	51496.6	41899.5	55126.5	36582.5	49242.4	89348.7	102727	84037.7	43755.5	57084.6
134.107020989287/2.582	969329	1.24443e+06	1.56585e+06	1.22237e+06	1.38061e+06	1.2924e+06	1.10935e+06	1.52191e+06	1.08601e+06	1.54026e+06	1.3958e+06	1.76998e+06	802881	994050	851941	1.55229e+06	1.57728e+06	1.64315e+06	1.03953e+06	1.33673e+06	710475	1.05701e+06	1.2788e+06	942747	842602	838762	899438	1.09709e+06	990222	810973
313.274454500991/16.0041666666667	233310	189650	516016	288691	212524	141026	154686	489033	170639	273820	239166	179357	424532	290586	165071	173837	194406	208699	144256	200115	274628	195215	166910	179769	195095	187841	157543	152560	143100	159698
856.579451828209/21.089	17529.5	0	0	332191	357955	649722	224418	679684	450248	803011	491038	323450	557805	1.27419e+06	593698	744980	375090	0	0	335103	0	0	0	343866	723825	402086	261034	205319	304226	819827
285.221599014975/19.905	295511	169293	87096.3	45202.6	19495.5	77756.2	65433.4	117709	73265.9	78994.9	140330	647438	529037	141991	444085	743346	631984	172679	168222	558409	129396	95448	69438.1	52560.7	93167.4	80784.7	53811.2	23829	48074	5690.43
344.13477891591/1.9215	671540	586042	284012	288420	705986	740876	377254	598770	415385	769081	483104	704046	251068	460812	536511	947764	832154	1.08942e+06	512239	493797	341342	418400	388727	401031	438339	430356	357986	407983	330455	321293
666.435525186143/18.2381666666667	1.64587e+06	77739.4	65554.1	81207.9	80289.9	75158.6	72925.7	56665.4	57391.7	62389.7	58654.9	46923.1	51404.5	33396.7	53331.9	56743.8	58286.5	1.8424e+06	96570.3	53547.4	267715	76366.7	57422.1	61435.2	220614	409423	195680	52245.4	52822.2	109150
692.377827581507/16.2301666666667	619259	300003	139970	307723	448609	267076	425827	551215	383451	794242	180433	264913	219779	175830	289541	495437	441908	395410	158371	401070	232562	265952	208123	282286	337802	345335	221750	219236	293971	135745
131.050094925295/5.07675	241622	190478	230585	227253	23337.5	215086	233401	203100	175204	245223	241327	253837	226880	299156	253404	235157	245063	301367	229286	184713	223023	204615	275729	238790	170757	181654	253107	198126	222095	109894
586.422822359542/7.851	130046	124353	136279	114016	136690	90144.3	96799.9	126421	94452.5	112669	83175.6	85944.5	86363.5	65193.2	94833.7	75309	65625.4	57170.3	87951.4	125681	187202	171887	166430	212223	148048	242569	180442	159519	181040	140165
286.229368090256/21.356	1.08599e+06	844361	781234	0	0	0	51460.7	85048.9	49145.4	76447.6	0	0	244797	0	310473	204151	195779	919534	519413	0	1.0976e+06	730305	528788	0	0	100187	43585.9	0	21400	0
385.274900576041/15.0246666666667	214504	166546	138899	192642	165677	158375	156119	267411	136343	363628	212160	318707	182659	162874	239006	161844	116542	261815	136894	195140	127556	126080	163437	118892	199673	160461	122644	168860	192018	196572
855.571661333754/21.3555	0	0	0	519940	37627.1	181986	250723	502914	109662	379341	114600	380368	163741	474943	2.00834e+06	838100	498082	37139.3	41271	267214	0	0	0	387449	756470	795514	526700	139274	232757	229464
297.27907469891/21.939	570433	50974.8	138039	545009	214762	305867	12949.9	555775	35023.8	642808	0	172959	194321	0	544817	147363	50091.7	744032	406441	0	35345	395825	62683.4	0	46574.7	25931	0	5671.57	0	0
361.274337529431/15.6328333333333	88913.4	450950	0	304776	278088	557549	121846	0	169478	0	22944.6	40347	6719.04	24415.5	164211	87907.8	203736	47788.4	285043	20635	281688	250320	605415	437808	684246	303548	486882	343000	426575	1.01731e+06
596.372193822305/16.738	558396	373083	158653	282949	240791	217064	256445	279078	230224	340340	69553.5	55790.7	34205.5	87256.7	96376.7	202762	118686	224240	151097	143048	262795	288389	467524	259009	279059	305944	218197	386966	471228	282744
690.352560857353/14.419	292836	337096	60486.7	264364	313749	332156	295878	64819.6	293687	170184	358349	299592	360376	154538	338537	661580	513804	349766	174299	419641	258925	243917	251721	285751	508111	371553	225812	314797	445877	300116
689.517899416695/8.051	91644.8	121663	138482	123486	151941	92998.8	82333.7	136949	99396.8	141665	160976	169833	135760	151141	188730	132269	98194	108103	132403	262247	158608	138345	145480	193433	112403	230441	128377	140818	153237	113679
341.763680274738/7.90933333333333	124549	163458	142672	146832	166352	119452	123260	164883	115197	164399	164110	138628	117931	156141	154908	135171	99160.3	131307	144519	221382	166792	155626	147751	216349	134572	279565	171427	217535	183509	136008
388.61118583917/2.96433333333333	500316	638031	180617	731644	656698	1.014e+06	555939	58808.2	833845	632164	66092.7	240787	435724	0	671230	803818	725131	369222	1.16288e+06	0	388571	487978	415090	453387	536001	451629	369177	603201	215391	251981
685.436666153238/24.2753333333333	394314	433909	339089	64626.8	65248.1	85539.2	207980	122728	207857	1.19341e+06	0	232969	119650	0	0	217021	541558	183767	299285	0	56909.6	16434.7	0	506557	475993	111076	129737	1.53708e+06	341764	371124
530.324802883364/16.6208333333333	338834	311573	136569	293692	214241	258623	252142	192896	248016	261819	68686.8	93107.4	78146.4	83804.6	91301.5	104211	111608	103240	95475.9	127008	366207	256412	301622	232164	317652	230067	222326	249038	268095	255945
778.399469117102/14.6095	592706	191864	4663.14	0	26295.2	67148.1	11372.3	147837	252780	1.01792e+06	0	0	53628.8	0	0	321637	512645	108832	0	0	763224	488321	345867	543617	508607	1.07102e+06	620023	390932	431572	340171
281.247685003266/21.8556666666667	1.40928e+06	595389	1.33138e+06	0	0	0	315968	688519	280284	567719	0	0	57414	0	489728	336716	244230	838404	307835	0	832874	1.05644e+06	559018	0	0	468460	292492	345781	368698	219932
114.987911267712/1.016	271816	183814	50619.8	66744.4	100752	201553	128980	163884	201604	266921	110750	121917	39562.9	79946.7	69518.6	182220	225194	191348	44893.1	69171.5	284941	283588	184983	213195	243811	202410	210599	528406	241066	200634
637.707809227472/6.01708333333333	42425.4	90997.2	106897	152916	150156	180690	358150	130966	333722	305846	230430	596325	312374	258345	324690	352478	413417	74043.9	109958	175680	38604.6	21893.6	42592.2	16640.3	26674.4	61495.6	62636.1	40809.5	35681.3	44299.7
622.968828487469/8.59083333333333	147883	70835.1	196275	79539.5	163293	67752	171792	228291	59926.5	209535	238100	257467	80989.9	201602	105689	88469.9	60868.2	240506	134619	314659	250276	229627	265152	261191	164714	280613	163809	250702	197882	189638
135.028766646121/1.84883333333333	199847	163648	226816	175562	193501	182352	173378	202160	151229	201375	207110	223291	179226	235805	198611	200526	184775	240958	184325	197821	122170	138502	147178	113549	87288.4	83248	92766.7	111031	114561	96605.7
573.304804670883/16.9889166666667	170834	149768	89623.5	299952	392249	320820	315852	480742	274656	474505	207331	128041	128889	167876	186503	63591.1	98574.2	71784.4	231132	192582	212545	438504	282408	0	112036	179804	145092	355731	176696	276011
279.121118890336/1.2365	152961	196159	85033	102902	206407	259861	205570	114086	207286	143414	117174	96033.4	136611	102838	128785	163828	165814	137787	104760	105162	154576	151601	129061	165526	197304	149782	144101	109225	100603	84546.4
414.290365544154/20.5885833333333	259730	158784	301593	22982.1	369993	63311.7	61301.1	146853	27981.6	99205.4	353231	404987	440954	21858.1	437610	271285	171089	604324	325225	390828	89501.7	121564	80547.7	54876.6	0	28716	20027.2	23392.7	23931.1	0
246.152321698911/10.7864166666667	1.10849e+06	293067	463844	258959	175398	164901	213124	155081	184204	180096	107143	165186	229958	121760	191189	191194	140329	427910	98661.3	131502	655335	191035	245528	223518	208414	145584	238673	155875	207025	180280
435.655433446799/8.6005	100493	151314	149999	146610	149185	84883.4	110044	148936	95517.3	167223	171123	151254	110688	139116	165479	132723	82007.5	0	122267	308028	203304	141061	153986	228400	120024	287832	165250	209018	172646	138554
170.05990711602/5.766	285525	233256	279043	205830	224412	242218	195245	267067	215630	305379	262509	337090	183674	349764	254724	344280	296078	286987	173567	229165	229580	225433	258694	191729	159187	167672	190142	214889	194398	159189
232.118207102592/1.83458333333333	199156	159788	104866	126218	215463	220271	173469	136535	230156	184527	123590	79334	135422	107139	81724	114658	161780	96084.1	111480	97451.6	177626	207300	156718	243909	231255	239370	157632	204573	182948	100324
392.210452354746/5.56333333333333	285575	417047	185045	112702	213324	222914	142747	199951	139536	401470	240975	254019	463104	252562	154976	438800	298937	314357	296931	446381	131112	219844	353944	90242.8	254674	242757	256423	123374	160436	321210
203.052629494289/1.41933333333333	720074	752422	153827	343049	499759	729060	952311	349214	982615	434435	184031	227572	266622	449449	247156	339418	399037	338025	267647	351189	564040	733100	623400	725761	707696	706006	493235	672310	685794	401892
130.159178125341/6.315	373969	175091	172648	182690	253144	294259	256206	198844	227033	224261	98685.5	197490	94558.3	97037.2	91895.8	165076	149182	372419	105137	79375.4	177892	223497	191791	149883	208057	277089	258278	207759	176888	238176
597.41198903188/10.84575	248194	185844	167936	305836	453055	275655	212636	294594	196623	368973	260579	315607	298389	221494	355910	307293	259007	250583	312811	210160	126110	212348	178151	169694	213765	406972	239351	344800	133074	132816
851.400362499853/14.2126666666667	206455	166389	79140.8	87516.5	106100	143078	115696	92616.7	184147	416942	94336.8	96519.6	99855.8	88791.2	121176	438292	474905	167214	146984	127085	636137	241736	223403	229953	305800	328040	588062	611050	290567	177039
852.618228656602/8.21483333333333	83843.7	127553	122605	126532	147585	96036.7	113841	131720	94018.7	134327	148216	138390	123094	145251	156823	149749	102594	0	133590	206597	132763	125005	131441	162162	105960	180029	138139	151272	139639	106014
658.336022006752/15.026	210664	224302	139088	263026	859232	382346	591806	247700	210962	255383	341408	316480	317146	213389	381144	230743	205795	228539	335685	482350	400688	164476	145771	173049	326699	279064	145472	286138	451490	159188
473.267550636673/17.8565	215364	214612	382129	595827	386751	236554	283857	386620	216091	130984	389701	406584	1.13979e+06	247879	574515	387963	457526	337588	574613	468447	24368.2	168388	265116	367439	396600	335232	218134	259217	339561	157872
320.184821065678/4.583	371871	280365	194536	126334	170158	276155	173686	205020	157104	274710	278219	119448	35592.4	353050	58772.3	250007	300458	288347	101582	204503	251028	159774	256590	106161	71469.1	112520	176255	175164	135392	33076.5
910.588112289503/16.0053333333333	164344	106430	581382	219161	140818	65780.1	71401.7	554625	76365.1	201962	180109	100775	387705	263424	97893	89207.6	102762	170851	87301.3	130818	220075	138856	112651	88740.1	103139	103626	79575.5	80477.4	72722.9	80503.7
648.859379331544/6.634	92775.7	94132.5	53536.9	67981.3	93740.7	107908	212266	140272	174712	243174	377525	422702	120618	207643	123220	178666	332438	184376	156249	136424	35834.9	43857.7	55331.8	26165.7	58956.1	75717.7	79744.2	101572	46577.2	72173
342.155887262852/6.21308333333333	339249	181000	150995	120917	272206	197927	222277	456152	226409	592819	339393	283993	190282	363827	213993	457508	404917	313283	120110	150398	127744	153826	102966	132757	101150	139085	101413	137929	104269	45612.3
482.26672601878/7.0185	41916	328360	270939	21714.6	223552	35625.3	30698.4	324545	24489.3	332861	294770	46462.3	16848.7	284705	272185	29339.8	21980.5	62066.8	248209	73544.1	33134	243334	16072.3	323039	22955.7	551867	25422.4	536638	264824	53971.1
726.657027304419/8.793	213607	114101	129064	48772.3	117374	77727.6	68685.2	107200	54115.9	173977	234733	577039	77937.8	564983	281657	569931	253220	503137	73917.8	262287	86963.9	37775.4	113879	24775.1	0	14846.7	48299.4	40483.1	34153.1	0
344.762263408348/8.051	94293.9	127698	136405	121791	151132	81582	88116.6	134063	92887.3	139316	145506	138087	104857	118174	151785	96713.2	83090.4	94792.8	112781	288769	177058	144213	141826	228726	108264	304421	139489	152655	163191	111024
302.150804919064/6.89091666666667	680171	829105	298247	176309	300584	235123	156646	206706	166853	533976	353829	558388	286289	572307	183158	496703	325115	534945	162796	794900	591849	529666	478300	210877	167972	243900	288138	269369	295568	87656.5
359.233352411694/7.917	186823	224095	209416	211723	209401	174502	194105	218034	167775	224230	73837.2	65737.6	64744.9	66114.6	73512.7	64447.6	52411.5	55486.7	66683.8	94627.5	245021	229614	206832	292329	217165	364763	263684	290616	261781	236359
675.544443358056/22.2379166666667	0	0	40193.5	0	61011.3	277331	1.47294e+06	1.35814e+06	1.22819e+06	1.95581e+06	0	239210	364463	346757	390284	254554	319272	0	0	0	0	0	0	0	26440.8	1.22856e+06	1.22919e+06	1.35585e+06	1.07828e+06	1.11737e+06
463.271539536799/9.88533333333333	299534	357073	211247	287509	670868	441073	305657	352313	362369	222810	53311	217154	181729	67357.5	205564	139082	104464	75094.3	125756	21936.3	296430	0	97008.5	58201.5	165727	529300	256779	209111	48297.7	139988
203.138223477865/5.20441666666667	360966	228399	325555	258542	246802	289114	312000	539774	316248	805493	693088	268890	263986	466888	230045	308317	567918	501145	124374	274725	249020	186004	150255	114394	93991.9	124551	112459	139197	94195.4	66335.3
250.12748435484/1.30716666666667	248866	239834	112832	168894	304602	309872	224845	151300	49753.6	233936	68892	97534.1	148195	70977	101915	86543.6	183007	89099.3	98025.3	79430.6	302106	321505	259904	413174	388237	335107	258917	281113	264840	176893
414.322465798887/18.9768333333333	205422	209242	237255	243407	235894	208942	199314	238476	210416	238004	346072	383794	372933	390413	380192	372798	326893	338241	351587	55911.1	198941	185004	205485	183516	201638	176326	181031	188497	167452	163160
779.540586681111/20.6285	0	0	27681	484894	2.41393e+06	85127.1	443606	836622	495080	1.17641e+06	281272	458851	234973	18198.3	97890.7	209512	237861	0	31276.4	1.3103e+06	0	0	0	144284	32507.1	441608	304653	517699	364513	393550
955.613716447707/10.8406666666667	305633	164762	143611	265205	439350	216121	218310	271842	202468	402310	159910	224518	189224	190879	234276	188276	165437	184635	249806	164735	205039	241028	211373	168982	250672	386721	265210	355614	142231	122495
801.598570822541/8.201	102089	117107	140196	133765	152213	94436.9	89777.9	152996	100729	162272	183075	196785	141985	167532	200696	138565	112695	122273	122020	275118	147351	115531	136314	180870	109440	205189	111853	128654	128474	111366
185.068408008652/1.09983333333333	141555	140051	153095	165017	133934	164354	141152	176350	159052	150931	116590	139597	133370	104904	135201	120757	121079	132397	157072	132321	159328	145140	163366	169999	149261	146120	173054	131639	147239	146927
263.139617468627/6.30083333333333	1.13931e+06	1.30126e+06	1.02847e+06	950552	1.0339e+06	1.04176e+06	252364	885068	1.14818e+06	1.30798e+06	455903	1.61956e+06	204752	536776	230011	2.08195e+06	1.72831e+06	474344	221448	1.46371e+06	897361	1.00111e+06	457116	193335	352425	199813	302847	409690	550029	278157
466.294263550462/15.5351666666667	122994	147532	742746	266313	83707.7	86176.5	121803	224768	239348	162533	33737.3	66430.3	400086	52387.5	34336	68183	147170	74632.1	63727.1	49033.5	247816	86284.5	157616	267742	204317	120732	100051	68297	66810.6	121106
229.14350059342/9.43141666666667	224333	288405	242894	252675	276161	360447	294382	85029.7	210874	189128	77236.2	250225	159501	77472.1	394467	361167	163711	127297	226614	179691	393757	248445	352445	170000	329583	203952	294459	277096	259379	213836
263.23680385973/20.472	348662	131886	98309.3	127214	209246	20612.3	80945.9	291878	53384.4	150748	296955	61777.2	272263	231708	154921	88605.1	62776.4	487442	241494	756981	100713	159734	155963	0	97508.7	104486	86265.6	124289	141891	94237.9
830.566309134648/21.3321666666667	5012.43	0	729763	552517	167590	328303	214722	475588	99483.4	317540	112205	646605	437422	194393	819608	333074	236868	0	1.71182e+06	306517	0	0	1.02713e+06	272274	549455	458490	242838	202349	247198	138469
615.159882600179/1.30316666666667	181088	330919	318082	474492	295522	344073	369227	110185	307140	244485	99593.7	210000	396432	5232.06	357629	196163	238178	105174	424967	58633.7	146846	221209	249717	188134	206846	136611	149682	194976	186756	149920
413.338336299604/20.2236666666667	188157	218753	235391	29770.4	735246	64742.4	99598.8	64223.1	66380.8	116589	14784.8	398841	202044	180912	414641	231307	144689	230831	310434	0	135544	93416.2	92939.7	58631.2	15376.4	51615.8	40422.9	54204.4	44215.5	26306.1
203.138751817333/5.45016666666667	232577	220880	156650	160564	182081	441929	242661	228900	284716	345026	305173	189528	139339	309986	104766	207474	275123	245120	109923	189761	169531	133391	132693	106849	97390.9	116084	115460	146242	90312.3	84891
794.570801367781/20.9896666666667	0	0	0	70877.2	675662	465972	544760	492179	362143	1.13295e+06	72446.2	175045	1.49337e+06	75671.1	150573	163430	730751	0	0	124929	0	0	0	47848.5	597193	454165	684018	138528	386314	554659
313.728952531858/7.87066666666667	92664.2	124016	119215	121761	131356	81786.5	108414	121187	80401.8	132941	126901	113151	84616.1	121197	134186	116522	75800.7	0	114956	224736	152151	123779	125624	183467	94203	232314	151976	169855	149623	113334
927.66285690304/8.48475	103359	189961	164187	166569	198900	73116.9	112454	134643	62372.7	180894	150621	171067	115119	123771	163148	142220	102501	127497	160793	147498	137325	140467	134670	198584	148413	163206	158081	150187	142364	173823
158.153820578742/12.1393333333333	214681	181045	182880	172175	170987	177620	210059	174739	196639	197760	117938	130216	122861	126087	111452	123012	121388	177257	134975	145920	82682.6	196842	201396	222808	169316	201086	178847	228063	190397	182946
438.240293566619/6.833	40820.9	307238	245900	19955.4	200926	35319.9	51575.5	297963	51602.9	318306	259677	65671.2	26939.3	266932	261154	24732.7	51923	46339.9	233221	56453.4	33430.5	250114	23276	305681	23211.1	523737	53885.8	515424	255159	52354.7
802.099682384984/8.2005	98780.2	117807	139429	129955	146882	95571.7	88491.5	144996	99645.1	162982	180611	196578	137622	166806	196116	130571	105199	124769	120437	271221	157933	114804	136499	177504	105875	200922	108515	127780	133012	110687
208.096736218598/7.867	121634	102791	126521	121671	154402	144626	89396.9	171804	107920	118919	181483	206449	180641	142732	149060	223266	179038	119834	162847	66421.8	75854.6	79198.2	86204.5	45919.5	50408.2	76865.3	54028.5	102021	106272	36619.4
537.375533754059/17.8751666666667	366481	321283	656651	562762	139861	267486	192963	341381	271730	169811	37287.7	55646.2	315515	33739.4	58241.6	103075	229286	72094.9	70901.6	65279.4	407706	269511	179631	315693	289310	220562	110783	106901	141090	93319.7
341.3057098452/24.632	407720	493179	74897.9	327269	244271	287196	144927	182146	146255	137743	440591	258870	248876	411446	372889	286773	299914	259252	758023	376250	346756	221322	280838	351179	306958	281568	292967	210815	247287	378841
262.128485459251/1.58616666666667	364132	315665	108164	157184	289651	370598	227498	261830	39200.9	337726	286880	335764	232156	249794	337996	699455	621621	439849	73657.6	254085	268625	38254.9	310504	375081	392363	321167	301870	330879	328802	189536
540.394274513319/19.7658333333333	211124	283914	427511	285384	183773	134854	123530	69228.7	157795	84178.8	81600.9	232559	891978	77580.1	252740	276729	364196	88215.3	304429	0	217345	177295	200440	286017	283669	297168	145143	111818	134225	138521
386.273472724715/19.9889166666667	240747	161349	460430	158468	312458	86766	24767.4	192370	81664.2	396374	247238	134109	286903	197689	156327	141042	81240.8	240202	114891	165940	109314	142806	68306.6	59584.9	38290	55688.6	23907.6	29121.8	49264.3	19399.4
651.1158691379/1.32466666666667	173953	345418	570515	620202	459130	451625	382223	229628	271887	293888	216614	456269	670296	49285.6	605727	311903	294468	212726	602493	133685	57547.5	140255	203484	124212	136122	43954.2	57324.2	155115	136029	50335.4
557.122551434136/2.89175	385224	288198	416017	268207	523403	269088	207881	321574	183574	488097	448955	358237	264371	429274	473190	300885	249509	647580	586600	437214	176685	262965	220903	143385	104924	193503	168796	292574	160235	114560
640.403501574112/8.50725	115584	113533	130750	157058	99028.6	169550	129478	110560	183080	121191	166242	173940	178945	195400	153399	229235	238445	160159	137750	157358	119897	79530.7	109920	85453.8	88809.5	71323	94687.3	68540.9	85906.9	73540.7
326.123757570505/1.39483333333333	428597	471764	172004	290999	389197	551211	280649	318084	370617	602671	419051	555324	361584	420717	498248	1.1243e+06	782873	923817	455141	364400	318416	395242	395549	307971	408251	379223	384837	453238	274429	342935
496.373976252078/17.888	151408	248402	640180	250022	197949	150093	119452	328960	140561	165163	117305	306996	238020	481342	197981	158840	124974	141924	240581	76682.1	252091	188287	210771	188942	98970.3	150081	118800	138993	91196.2	90665.9
263.069837161034/4.68333333333333	170195	173191	129087	304662	157998	163474	171723	340363	194512	187269	177676	238032	245284	99908.2	327712	193397	180253	159749	138116	73462.1	301228	180426	275739	328741	316358	225643	315291	184517	297733	226751
279.232251006874/16.6868333333333	821239	94281.5	41012.2	35881.3	79282	55157.2	40420.8	61660.1	30896.6	77865.6	568641	292100	140887	521704	284021	268067	188200	533301	314095	282711	80304	54775.5	47368.3	25578.1	54478.9	44132.6	50493.3	96849.4	49256.9	35442.7
124.086931913261/24.3300833333333	750112	654554	544596	78882.9	306619	306865	248350	279401	249265	230392	239284	273467	161234	346371	242690	258780	148672	542573	568052	66000.2	566705	574240	440248	86473.4	273939	230661	251091	132139	213051	240989
988.644757044036/14.6283333333333	88268.9	140042	372972	289399	63977.8	73061.7	17340.9	93360.8	168804	69885.5	6556.52	0	138600	0	0	13880.8	109643	28584.8	14413.3	4821.16	109375	109002	91215.9	167633	360531	106000	40155.1	65787.4	154488	133922
510.357027802399/18.9711666666667	177418	237373	414770	331166	204630	138631	118806	237206	113555	115510	114792	95756.6	453311	139247	129830	135309	181179	144053	111570	91862.7	285664	197789	203051	245326	42642.2	245761	178278	165639	187441	193033
856.582984072697/24.4631666666667	21410.7	56513.7	143944	0	56424.1	110416	619072	566194	540347	368740	0	76180.9	589952	115867	169411	76133	612404	6607.55	0	0	0	95530.4	117475	0	8403.83	771772	571449	440131	610064	477513
678.578494216917/8.734	324375	220761	473475	172349	270182	125892	78982.8	125386	84415.3	148925	195707	186921	271285	265012	262068	91211.1	96832.8	152282	120324	221720	221537	202301	232118	133845	36579.2	131941	172493	129465	146194	32758.4
382.332029565093/22.223	641162	430484	1.05423e+06	0	0	0	143078	218046	119356	326257	0	0	312864	0	281967	153143	4382.11	527428	399920	0	294297	216549	208603	0	0	60678.2	52955	45030.9	54492.8	20572.4
508.341127086233/15.779	199417	148139	289156	206509	112922	97867.3	126218	158043	206999	122913	191853	53709.1	325993	27421.2	50668.1	363234	268015	368648	270243	53722.8	294761	156201	159372	216270	174276	142980	105661	675981	920530	106808
511.39631096595/19.1910833333333	259372	245277	730044	298302	292003	186229	157366	442216	196732	276705	109016	255414	187335	383288	172951	156011	140301	131098	186791	0	268378	243099	266432	273811	155541	204951	189009	224111	161654	162666
345.138115460775/2.18883333333333	244804	179871	164395	143898	228387	203556	196517	1.61654e+06	177014	249492	2.14231e+06	1.54708e+06	219285	482709	220635	587973	478264	257869	311846	252717	119001	170933	210291	250369	283373	262047	252134	291304	500024	329496
789.409899526577/5.95	68512.3	61383.6	72373.8	96821.7	115185	110629	195327	113817	250350	253723	238134	285029	112965	270695	157581	228114	373080	133533	98603.4	124161	47500.1	26272	46579.7	22772.1	29475.5	69545.8	68957	67479.7	32453.2	44730.4
306.307093310523/14.303	191251	234877	135410	149027	188112	217461	227333	459892	200631	341428	166907	112749	182449	99164.1	165860	187539	162202	105251	104822	127298	60880.6	82279.3	89161.2	101736	94194.1	117761	148275	197287	113285	166494
423.252605053958/24.6401666666667	311000	259889	620449	254389	223906	179905	238468	263920	172656	182570	154512	264501	203843	83623.6	127870	275393	178213	1.22048e+06	0	228348	642005	609948	313556	227048	213279	208537	155846	216021	205616	148968
767.542058735328/24.573	0	0	0	162845	475820	176946	392300	750427	512002	826906	51192.5	78449.7	271787	359447	454072	555269	214363	0	0	83680.3	0	0	24709.5	294924	352768	423958	319761	310401	453025	242472
593.342028347961/16.45275	364584	334762	227843	254409	304410	283838	302644	300656	245328	364619	100417	85079.5	119714	114110	115676	140873	125320	178578	128057	133911	281826	368805	287681	254120	239703	321959	223891	321096	285773	172134
829.55530800468/23.0935833333333	0	0	1.75983e+06	122919	350686	179572	237865	515738	44419.6	480602	286749	268007	594222	0	590808	431864	239041	0	57435.1	455566	0	0	1.43323e+06	83900.6	367864	1.33492e+06	1.39976e+06	148036	952094	248037
346.9322177045/7.73583333333333	110728	115369	121364	91152.9	146912	86867.3	74659.3	127989	87773.7	150748	124369	111546	88499.4	123254	135666	90546.4	83831.5	96349	102803	244586	161308	142629	121104	170015	109583	329673	139992	150496	158963	114628
344.262356484446/20.1565	413964	339240	3.49969e+06	392731	550685	186517	113702	1.11141e+06	113681	564480	100272	387174	430962	567416	259744	255735	163525	292452	114934	362681	361986	346459	189421	253795	203707	77215.6	92046.2	95493.5	112335	56019.5
153.040679439697/4.26516666666667	290021	316563	211030	360632	286963	324649	256443	207643	301215	214263	246112	268423	275061	225548	326843	306387	329048	292329	385384	265813	293749	249072	277561	237063	254234	189231	256555	304308	304751	263802
830.563513883823/20.14625	0	0	855168	358122	1.42638e+06	323813	193949	289923	129337	162857	345267	183339	198356	222842	333056	266174	360223	0	1.08307e+06	585748	0	0	797322	238649	669832	193609	212412	126829	251459	162550
360.266474514604/8.43383333333333	91170.3	136445	120882	131941	135757	78897.6	105388	125255	88539.2	143775	138166	119659	83443.1	123039	150947	126517	80081.3	0	115594	264646	174501	144847	139390	205266	100997	266056	147138	179835	153402	118400
387.181125341471/13.5668333333333	213725	170394	174742	173178	203479	164665	160002	144121	164527	232185	236126	213908	312611	235620	318672	235806	221299	238292	237583	231724	177518	176515	146640	158156	193297	151393	167727	164601	155635	163162
845.509786279443/5.46666666666667	88396.4	247398	74023.1	117666	63615.6	334727	121241	54548.3	184474	48259.2	225326	149253	87565.6	107565	78541.7	178697	335368	66133.5	86894.2	98697	105977	81641.1	139250	104039	77460.5	74680.3	77203.2	71369.4	86922.5	107621
488.299374154954/10.85025	421082	319373	261974	380740	242835	339980	337597	360196	336650	327722	247147	285568	262667	264727	285793	253644	241303	255368	290890	252922	346715	456334	331688	339452	365301	308154	346206	351386	341285	320609
775.212509451265/1.3	174200	307950	99550	306090	337003	373625	324646	74713	334718	259968	70067.6	217883	267188	0	392307	392633	418208	140544	569170	50370.4	72415.2	168328	174787	150910	190862	116469	113417	183210	156679	92588.5
477.177342155859/5.1995	145649	170188	198148	201265	232600	162684	177124	146299	169541	154330	64084	82739.6	104427	69782.8	89613.4	57765.6	61417.6	44827.5	80322.3	82780.8	150708	128675	212245	193151	238036	251514	198051	161967	192992	165271
353.288870409939/19.638	106841	98918.3	102841	149929	23790.4	70162.9	61894.3	74804.4	44138.5	60883.5	290712	287103	398680	377370	466496	298949	211600	391783	274493	0	59643.6	61589.4	60219.2	59841.5	35445.4	39060.7	35275.2	37225.3	36636.4	25600.6
493.168858314264/4.69183333333333	136989	142803	207325	230827	214999	132949	115163	105225	110476	101094	208203	221709	183675	378715	167517	123612	90472.2	109839	138130	208342	125759	107009	125103	170691	117555	113198	151158	45715.3	66212.9	89116.3
634.336174081201/15.0673333333333	240269	237337	301148	473977	446514	265540	452418	229862	353677	260079	73992.9	114494	306525	64074.9	150192	177397	225847	54388.2	140254	161422	233568	187670	197089	385755	404440	348283	195430	193589	271264	201609
833.58528845484/24.4335	0	0	118645	122484	309205	65999.9	140496	919769	155674	91997.8	56151.8	89695.1	573346	310653	203045	141652	637924	0	0	171149	0	0	138341	124775	198502	679589	731655	615865	461985	654787
831.57248782258/22.9226666666667	0	0	97669.1	53923.8	231948	1.55661e+06	371301	792309	568911	604096	0	581396	72840.9	1.40741e+06	928862	59008.3	942748	0	0	188421	0	0	110244	837917	210056	529776	469970	903222	377536	541448
516.307430475846/14.6201666666667	171656	182314	322456	230788	109199	153863	153158	162701	198125	151821	49448.4	26323.5	175613	39425.8	32083	41221.5	94472.7	81802.2	58606.9	28893	290013	201605	197780	193602	247930	172116	145263	159297	206580	225154
299.110876221229/10.75125	179663	87545.2	190525	97299.7	138017	142217	127184	220882	136823	168191	176648	67995.9	115871	90573.5	83406.7	109028	72756.4	112433	54808.4	79045.6	171576	134488	118565	106182	223656	164451	181798	125372	114305	192059
503.297461313286/15.6023333333333	436272	540430	883994	520634	214490	184144	484843	165198	452449	190378	56078.3	155907	386774	51134.1	166542	368207	445176	55602.5	169127	138077	654881	333802	520714	615894	729159	194681	157965	351664	507997	212182
779.540606133268/21.3391666666667	0	0	0	837279	116639	233818	254313	296805	165236	235377	312418	980508	471993	0	672041	845937	934535	0	0	566344	0	0	0	646761	355793	347034	213849	162202	113459	126057
291.272852925592/11.69825	82989.1	95911.6	94427.4	123703	97430	58246.4	93507.4	63210.6	62620.2	145662	145488	102039	137030	109154	85198.4	126957	119148	112999	118995	87682.8	355391	134534	71660.2	113371	421959	41716.1	274090	32977.6	100534	176208
448.234163736687/12.8539166666667	52994.5	133004	235538	265277	236582	252563	191279	213075	196850	204151	258454	312676	369863	292551	324207	282815	254377	98881.8	160364	178442	65728.5	81448.1	125094	127425	150683	124358	119124	132464	152386	153663
464.349706683554/13.0601666666667	370863	346423	172556	239535	330042	361740	393771	230825	375476	579286	328412	234540	156377	161474	230300	418136	424577	193263	204829	240529	509719	210064	288424	333852	306740	330992	323099	359388	293563	211650
980.582351722398/15.3135	125036	111024	234931	201614	66767.2	83539.4	96604.5	78612.2	150595	49256	39916	112142	83485	50504.9	93827.1	84267.8	73311.3	42757	112765	68520.7	165009	96484	142208	201122	102044	85481.7	105092	70355.5	76163.9	127623
184.07330868024/1.166	200945	194964	237900	242246	199994	181711	247481	316543	163086	179434	245785	318502	199471	370564	389889	246991	271208	351082	308089	302891	174108	198243	194445	178394	161795	166522	197080	152423	141194	174881
485.334156353681/18.3843333333333	220798	220975	375619	278050	200727	164141	171344	300316	154349	202939	213121	177424	331667	241068	181227	167170	182035	212627	177571	171263	259920	241669	236131	228203	237440	221674	203100	189180	200053	210847
357.214204107079/4.75	217316	404608	238591	307861	171984	549983	299089	164704	431637	155360	242663	170206	289727	132981	150914	254584	394139	128977	261160	143930	233003	249182	390035	180810	184366	180279	274971	251943	321909	134521
326.14274846144/4.90008333333333	131672	116572	181404	149656	153498	79368.5	101847	256292	72195.7	165805	162839	206701	194604	216456	213334	36861.2	109986	206666	197844	181996	101395	77131.7	112871	69759.6	79810.3	95867.6	97555.2	57133.8	67296.4	60667.7
311.237787959302/20.988	327758	271766	365266	0	0	153949	167033	271214	100294	192067	0	82202.2	301890	0	328764	258778	188385	472529	302666	0	284529	288906	257439	0	0	151813	132010	116881	145489	107119
189.123104312297/4.42816666666667	555031	309407	466350	230592	328727	319889	305143	717565	318392	678305	402214	273271	161806	475416	185459	232115	412650	356856	137938	233385	213579	271033	228390	109198	74137.8	139979	155041	226156	144662	52993
333.106388628247/1.11425	132220	139804	64889.2	105228	174754	198529	109830	107930	146058	185176	153744	177562	111702	134791	181572	269822	268462	227689	197817	127321	94453	105393	136983	115978	143111	99244.1	118041	139407	118657	99050
239.236837894286/21.606	475737	411491	409493	211110	0	0	100934	123647	91592.1	105480	36272.9	0	5178.49	0	184065	139253	89956	409154	358429	45389.5	465111	440226	360043	245160	0	99446.6	86488.6	92992	91782	98603.7
118.08644455812/2.432	361043	268673	504224	170863	808986	548693	503332	607071	1.45902e+06	380850	418393	227171	223628	361886	2.01104e+06	307119	410546	553694	393707	354064	461394	212882	509877	422987	342195	485682	400153	1.46192e+06	760794	222298
379.104667142476/2.96391666666667	442099	544849	144741	567122	545334	740200	479683	43942.1	702067	562440	54986.6	199840	369347	0	624727	652247	615381	298375	1.13622e+06	0	303497	429293	393952	359328	532776	363769	305523	573833	184607	38951
770.570095398162/21.0905	0	0	0	0	384018	278917	123125	343456	134401	906319	437546	1.06013e+06	1.0012e+06	821635	170812	127215	1.66968e+06	0	0	574734	0	0	0	0	409808	453322	143598	74559	168150	122956
243.08802406835/8.49916666666667	79902.6	40659	72040.7	55818.9	40888.2	32772.3	45462.1	53053.2	44045.7	57945.1	168245	148566	193930	197407	152717	172528	197954	124194	157959	184977	149318	135710	119753	89757.2	95652.2	133018	143276	129698	116070	113261
529.881506401266/7.73583333333333	149246	121873	155045	110728	149961	102041	100732	139265	112151	148863	72923.8	83948.5	87586.7	71870	103253	69690.8	61979.1	58811.3	87139.9	128851	180477	174703	150745	175613	157458	319482	204478	167602	195933	166030
802.538032713516/21.1038333333333	0	0	283931	2.40844e+06	77920.2	221035	101518	232056	39506.9	345043	156523	120555	196253	28817.2	1.29858e+06	121051	100352	0	44060.4	366706	0	0	372500	2.87004e+06	453366	170563	167546	24985.3	108747	109726
509.344373035657/18.8553333333333	157550	191379	689499	304069	74464.1	115369	123757	276535	158623	183873	81135.4	109172	461763	96250.8	104035	152119	270373	130856	136384	54366.6	272755	183017	127987	219486	228575	105084	88318.5	110486	134456	148860
139.050130033741/3.47166666666667	85172.2	327261	275498	489258	269010	397734	260552	121964	89826.1	76416.8	274330	617631	800173	248648	592435	679575	1.14059e+06	124174	280701	228391	68016.8	74267.6	235794	156494	549218	222638	314975	71372.9	321824	449011
320.07536485924/1.214	95758.7	171090	135196	266476	46390	237682	224416	30726	145265	138396	330049	381953	281973	295687	340046	63135.4	32375.2	295142	39369.9	53777.1	38383.5	64448.2	80758.1	75951.7	83679.5	45403.1	46118.5	60549.8	53502.9	37080.9
852.41474402094/14.9868333333333	464207	178916	0	0	13952.5	69950.5	32249.1	0	190728	912414	0	0	0	0	0	37617.3	35845.5	0	0	0	222905	293257	257416	246414	222078	728993	305257	358200	330976	206797
580.297642725334/15.8911666666667	34906.2	159017	0	68752.4	36987.5	21720.8	106883	0	0	30389.7	342714	211500	416536	201380	518464	264734	501431	87530.3	608472	349486	66066.3	33423.4	55411.6	159476	224302	79479.7	87652.7	45092	150705	145026
540.307222038685/14.4986666666667	367004	227863	280726	246384	350443	155337	33991.7	287530	32407.9	267989	103264	36794.2	36949	77761.8	87753.2	74252.2	41488.5	83867.2	90122.9	50412.4	178426	184503	180461	159746	152943	356572	141609	188099	87018.6	71649.1
231.169247361356/5.61633333333333	192534	116890	236521	140051	138146	143192	37881.9	211328	118283	287739	270844	297588	129776	461848	173912	239910	206581	253803	98465.5	148264	125301	29619.4	119736	63978	45984.4	60444.2	75773.5	91756.8	61789.1	28225.4
166.05797045382/1.57683333333333	613153	575429	688688	344023	579029	604689	522876	618390	480697	644477	671059	354546	550540	791873	579300	703492	676375	435363	458060	591433	466244	413838	530652	429934	382153	381467	422114	483863	448297	349013
413.289104732843/10.84025	214777	89422.8	80768.1	158155	339504	145752	98582.2	197683	125448	290315	140910	233163	184273	139056	233101	167726	162413	152069	227398	131486	87276.1	45804.7	107647	81590.6	160730	306247	170731	251242	77020	69432.7
469.316109431016/18.9883333333333	107010	126937	213279	155903	183376	81538.1	97847.1	73271.1	49037.1	89361.2	90352.1	366888	135032	258242	320579	202829	100814	151557	182363	182123	97771.1	64578.5	112838	39148.8	24599.7	58724.7	52414.1	42981.1	32221.5	36730.6
911.947677803932/6.567	120613	119865	107802	109061	113523	136436	89865.3	178283	88966.6	153151	198390	168281	51898.3	342331	153632	145153	86319.3	345884	128230	327492	76739.9	44491.2	108309	34490.7	24699.7	36106.2	70496	51896.2	56496.1	45136.3
705.591767773375/21.97625	0	0	269805	172567	1.56823e+06	1.25482e+06	530854	1.79338e+06	314605	915072	98090	136088	1.40507e+06	0	3.42029e+06	881480	1.28616e+06	0	69864.1	67171.3	0	0	167549	200898	1.52305e+06	372805	544760	199616	345498	1.95377e+06
504.307340565187/18.3719166666667	350072	321924	224485	310949	297382	288092	296543	233637	274649	282642	260929	242529	187172	166065	245404	238503	233090	156276	264513	246133	194940	341614	319465	317761	306339	302331	283574	286026	279802	273192
472.343453787054/14.9826666666667	124949	101628	178360	52585.6	133177	66287.3	66929.4	137112	41805.1	52215.6	219363	130883	75786	138992	154939	134076	50914.5	148031	126421	114497	93690.3	170284	92000.6	65612.2	113863	94699.1	87454.3	183902	182953	73665.6
840.568681063658/12.3749166666667	136234	26264.6	0	25280	45936.4	290116	50570.4	0	7711.28	48871.9	43621.5	814997	116532	23505.8	177546	63936.8	49627.1	56656.8	316488	19561.7	0	69298.9	45873.5	43519.3	130744	524541	74402.2	162043	5280.86	41517.4
653.479936227634/8.60033333333333	79504	121744	129230	137050	129000	73243.4	99295.1	129446	86867.8	136052	147406	141669	114803	127311	179008	142761	88168.7	0	111836	226187	150473	134506	133823	171539	101978	213886	123745	161842	139010	109312
262.129472709289/2.08516666666667	296479	162993	37149.1	140202	276056	40060.3	128066	245600	266056	366048	254232	389423	242341	196207	347006	546502	55570.8	357483	41543.7	246422	265807	56929.9	40664.1	56678.4	48866.1	49228.9	42663.5	69759.7	317755	45613.1
260.11264188541/1.28483333333333	124920	138243	71296.6	123379	184913	158007	144964	196999	143234	178691	194983	235310	153466	184134	231544	315119	272948	220922	172539	170655	58677.2	85955.8	103152	106783	109131	75834.8	74572.8	105617	91251.1	57156.7
374.544886542481/6.016	5164.45	76947.2	55393.4	125880	55285.3	147547	225013	0	178383	19489.7	173979	403286	277731	72023.5	151870	304979	991356	46506.5	75601	90677.6	69741.3	17683.5	51586.8	43283.7	56299.5	66510.7	107481	74981.8	65896.7	99197
296.160073111824/3.4205	259795	118718	71575.7	83717.3	158022	691994	154426	189809	770437	882926	165457	122778	143807	114682	157550	336921	877496	1.03655e+06	165237	157184	327978	438008	361838	1.43387e+06	915632	405156	984833	810037	257173	222709
189.123480111461/1.29091666666667	162843	148291	202566	160026	165773	170925	166036	245038	132514	169764	201661	164206	150704	233752	139539	143212	133914	158912	134270	139937	129771	93457.6	148057	106378	101995	98293.3	113364	123488	110899	79189.3
520.33181877906/14.484	307046	229702	257638	255084	398260	135964	65557.6	255004	34237.4	116887	90304.9	35698.7	121858	53676	87583.7	78090.8	83088.9	54699.8	46004	53771.3	72162.2	130137	128311	148982	179721	384451	105774	137082	80635	48913.3
180.088450136764/5.21783333333333	128564	107441	119388	172853	185689	120020	93995.1	208093	87432.6	127980	133395	191142	222669	149864	227143	150534	92072.1	120278	173028	132688	63126.9	82439.9	87189.7	78706.4	86608.3	105255	98618.4	101057	54478.4	85938.8
230.157225746859/5.66533333333333	432408	1.22275e+06	324342	466001	270488	413690	244872	219201	535191	629626	295110	499046	416915	363860	179260	391387	445460	296361	187534	593421	355356	370126	274817	156427	163279	377929	216099	334374	224525	129531
831.56970232691/20.6391666666667	0	0	719960	291154	731326	263260	133186	302795	108075	248889	777116	9608.54	51321.4	156438	142641	25045.2	36381	0	550764	1.46379e+06	0	0	481214	305057	366897	241335	138082	152751	311182	141189
275.277520691246/11.8246666666667	383143	38845.2	54823.2	36710	35333.2	32367.3	311371	360088	502026	43797.1	44491.3	87877.1	283417	53515	81662.6	61448.7	72695.5	38922.4	77422	70171.9	41904.1	269924	45800.1	35694.4	38219.7	309594	32862.2	319252	25251.4	610885
120.081025384399/6.22175	261983	191422	323543	186135	224359	202310	170088	286760	169543	279151	307809	337782	232794	423825	253006	277528	259529	297371	193909	221372	166636	168363	159534	135133	104088	124401	131079	153448	133669	99999.4
802.399661415552/14.03175	306775	158022	0	0	0	56707.4	0	0	288674	137886	0	0	158935	0	0	670456	1.61308e+06	0	0	0	676510	370575	268318	759378	504881	681127	347266	243403	337597	223068
663.455047289929/24.457	70296.5	64175.4	55668.2	0	0	0	587279	180407	567124	683973	0	132793	623033	0	0	253661	130236	83504.3	133029	0	0	0	0	102728	101806	215629	255038	290781	689398	975070
876.55223523893/21.054	0	0	0	872398	418072	449451	187600	377387	126643	149821	0	140648	621384	871085	427213	360252	185950	0	0	141976	0	0	0	769243	663034	447563	288303	101548	215587	156775
279.686761735364/5.867	190565	246292	190612	104897	167920	308440	261085	89426.8	195026	230378	256030	147235	84284.5	441102	112377	145678	241251	139393	121132	166392	224066	24827	189599	75456.3	107987	108209	138945	118144	69213.6	189160
658.393848169749/18.8105833333333	226567	273796	176369	258522	129310	158849	210294	109887	195021	138061	196086	448361	1.16197e+06	179501	723686	552633	635506	238176	253671	97341.8	178107	182588	199716	286183	337692	337254	235616	111114	154323	97734.6
355.273522080441/21.605	540576	515998	541023	0	80490.9	59308.5	51773.1	58357.8	38459.1	47870.4	0	4786.55	67193.1	0	190112	97866.5	53480.1	521695	526500	0	555709	510657	464301	261580	184127	43742.3	39218.5	42934.8	39942.5	47048.1
147.044439796953/1.56466666666667	559948	550243	620318	531301	483918	556474	464519	572588	464575	591781	332023	421280	544135	775571	584990	686841	660196	422583	433748	301633	427859	446934	525122	417548	378373	311006	404615	481606	429259	342449
394.215491982976/6.59858333333333	35035	262855	220305	22661.3	180922	38345.2	41610.8	252337	44658.9	292340	201961	46565.4	27516.8	231885	212617	40989.1	37174.4	48557.2	193155	55018.4	27573.7	200393	22406.5	249940	20541.1	434684	28636.6	430414	204038	46836.8
527.370164012905/10.8461666666667	82378.8	201170	221179	394096	541527	359059	307983	373799	300644	290314	266378	359938	389266	244605	431966	306497	286693	95703.7	246716	198731	81135.6	163460	151652	159634	197926	279035	204258	298410	136425	127404
184.085813741502/2.22308333333333	154211	154539	161863	149234	160439	150666	159752	172564	145558	152983	179186	172207	163623	150157	138588	106192	153965	148779	143858	132352	156447	170531	173625	179833	173270	189151	195052	89301.8	224410	206207
331.20597726356/8.90883333333334	117826	73782.6	268784	166471	197384	133363	104443	111771	153599	221764	75186.2	109170	441079	89590.8	208039	244955	110055	304980	141145	80446.5	277551	99811.8	138908	122079	88127.5	80430.8	189094	225550	178172	140387
464.358891297899/13.4206666666667	360497	293961	107429	151430	336984	202896	228311	296405	188972	366122	331165	151490	172282	189855	193106	338116	287516	278729	232508	330598	221619	180899	227346	224438	210944	327069	322039	283492	192715	115560
523.350146532141/15.037	155582	213338	165483	201506	94678.1	174892	99233.9	79236.4	174426	47216.1	68677.4	104442	217331	48532.2	112857	181936	344585	72078.6	89097.9	90524.2	302194	231098	158864	247198	237921	202723	154745	153212	150791	131708
576.851581011571/7.267	47015.1	79539.3	99340.7	77727	82999.7	94966.6	66311.9	61859.4	65261.5	64920.5	273223	222059	181972	356469	118823	195792	204030	233456	138556	214717	81957.4	70400.7	48027.9	42950.2	57635.4	77748	62338.2	125307	46510	51295.8
345.012961743038/8.051	86176.2	103938	111557	96371.5	119902	70069.5	72987.5	112947	84318.2	117290	126891	117775	94825.2	103592	133104	77684.5	61117.6	78581.3	97198.3	237370	149642	115882	128909	199627	100269	247812	110155	128090	142098	97654.5
192.101892366048/8.017	127452	123801	82291.2	93640.4	79601.2	189511	72375	115700	117726	138963	77061.1	162888	74834.2	92898.6	99496.9	196909	247986	80506.2	75949.5	50119.4	109608	131848	132717	101443	116177	85518.7	98026.7	123691	99508	88724.5
425.267504624571/19.9220833333333	267036	222457	66207	112700	0	80522.1	70070.9	148030	51245.8	75834.5	146385	68894.5	133735	141202	196406	60503.7	40200.8	484297	392638	0	212580	278635	283387	88948.3	58951.6	49414	40507.4	59909.3	69293.3	62444.2
755.540662830065/24.341	0	0	117009	199548	1.08179e+06	753935	111216	474024	77205.4	182782	357996	175067	0	579789	120567	173412	0	0	0	285088	0	0	491900	143785	794664	64235.3	340257	352810	186831	43845
317.233214482249/11.6038333333333	69235.7	105368	39071	114637	76718	62480.1	85530.1	77243.3	30835.4	74483.6	96804.1	85508.2	63470.9	80998.4	90534.2	111378	46687.4	111170	70346	374960	164612	97597.3	99758.6	234119	37364.5	89739.6	123675	162396	101372	51261.6
484.118111528559/2.15866666666667	122819	173611	44797.8	78795.2	37377.1	234967	193965	74773.6	155122	149743	83989	69169.5	324285	0	159462	93405.2	169601	24039.4	425374	61091.6	246599	399583	301265	390039	543667	481010	502394	429350	392698	453454
802.537452627877/20.6264166666667	0	0	17944.4	2.60838e+06	2.03842e+06	254481	157930	429018	141771	227512	48365	319384	188606	0	50772.3	195805	202712	0	35355	1.11065e+06	0	0	0	362756	558047	305078	268723	165078	247803	194899
267.268420842438/24.6315	501094	511463	559083	452975	391184	267298	375110	398938	294741	330487	256656	348595	388097	270227	371581	396843	297434	2.11185e+06	198913	384792	429797	350950	242884	77667.8	277298	221098	197538	263946	204438	232657
699.506160737366/8.04983333333333	95689.3	100430	114610	104382	113686	77757.7	76866.5	101806	86668.8	99909	78897.7	89314.4	79695.4	67813.5	90165.4	74520.5	61793.2	70548.8	84189.3	117622	148477	135788	136677	168142	112159	160068	122733	114299	132851	109808
113.034956155907/1.83975	99932.2	103747	104492	155227	133240	109325	119050	125584	141202	95045.1	77090.9	90011.8	168983	86626.1	142122	80676.7	68784.5	74861.7	183305	103726	70418.6	95639.3	84736.4	104009	128275	49138.5	100841	99076.8	108636	231886
567.326163033551/15.1325	206079	248237	184707	202527	141143	221218	192385	128185	193130	144312	114531	84238.4	121997	97877.3	102181	87825.6	154884	131084	144552	71243.6	284270	260129	241070	253279	256854	245774	223799	244556	232101	208686
519.326389400076/16.1330833333333	376455	385013	225334	240022	420774	378617	399087	361640	386116	355782	344101	256201	340619	345855	331742	285520	297117	369615	363576	309263	366453	328495	345351	302292	334506	360487	369999	389106	378364	407506
435.989615178216/8.60066666666667	79483.9	116387	107245	122463	115562	59818.7	89736.2	113922	78190.5	129007	132981	121482	83224.3	109181	131994	103952	67454.9	0	95867	248303	164771	116039	126620	185432	93677.7	243605	129763	164698	138858	111782
509.288563326034/17.8416666666667	186760	189834	331593	509218	337151	205765	247394	339054	180151	110958	334122	353792	965096	210674	486007	327753	384186	295085	471975	367214	84896.7	0	66169.6	308428	326337	268204	180319	204915	271081	119323
391.285317448433/12.367	112145	57243.2	16554.7	57870.7	105293	286732	70781.6	22059.9	51775.7	105363	82330.3	530626	147323	58429.3	293202	109282	90953.9	86284.4	255850	47172.9	56342	50965.9	79039.3	77018	110377	475692	97270.4	210029	26584.9	61690.8
473.349431407527/8.66733333333334	75907.5	112178	118819	119114	120873	62695.2	93844.5	116258	78928.9	132516	136411	127694	86118.2	112079	132128	105242	68239.5	0	96709.7	238397	168925	119637	118136	190998	96406.8	235952	128351	166227	124052	117500
500.291437874398/9.88533333333333	248181	308027	174699	238522	568537	365724	259839	289564	299272	170560	44146.8	173574	145648	50816.8	157985	111707	85828.2	61715	96812.5	14197.4	247526	0	79668.2	14415.7	134365	435564	204269	176537	39077.7	108543
116.070842700098/1.95875	727321	466432	587870	548816	510297	463145	379630	492034	314377	439435	443335	467797	455146	489270	458052	492363	418609	480184	555330	488798	313588	315821	319879	274787	225731	248847	253568	242423	230355	173889
482.417671637773/18.688	211568	102811	337054	112812	54432.8	94696.1	117450	485527	0	0	66964.7	99815.1	63819.2	66057.9	124796	183386	91953.7	76610.3	115761	21130.2	121716	373787	0	96037.1	12488.3	53216.1	66529.1	75844.7	112034	37557.3
310.169689426686/1.06866666666667	119168	133175	70115.2	115041	162864	156335	104480	123737	102244	160595	225494	264325	54442.4	238576	235029	368338	245677	245915	170144	198318	56425.8	65831.2	91851.3	71349.7	63114.7	64475	68792.5	72272.2	73399.6	46647.4
874.599429901931/8.20933333333334	78301.6	111688	106217	101331	123988	81934.2	93572.6	111273	84196.8	121792	103875	100132	74793.7	101795	94214.5	97590.5	75495.1	0	91626.3	130759	117546	99407.1	109125	127675	85575.3	129431	96279.3	117227	106288	88137.4
130.065429339534/5.766	239608	188459	222333	161538	183109	204205	167407	224403	179568	242723	203313	269677	143129	290995	209575	280289	246649	254742	143713	189711	191374	179509	214911	164973	132039	138189	159595	169286	161720	119100
912.448202479361/6.56733333333333	116150	119006	104294	98485.9	104046	124558	82281.9	164904	79799.5	148096	187176	156699	55248.6	323181	142629	147997	82709.5	323100	117484	284201	71138.7	38741.9	101642	34095	6075.23	32408.4	68777	57149.9	53511.7	41630.7
398.295284062847/8.52483333333333	73837	123332	113711	108656	117529	72215.1	90244.4	108479	73559.4	128322	124145	108289	79301.8	104942	121655	97152.1	60459.4	0	100131	228422	155303	114145	122543	181337	88814.2	241553	120440	164468	131182	103327
574.377089474701/17.02125	411192	200897	200798	165597	182569	127958	139430	317962	103011	305626	57203.6	63856.5	119532	84245.6	80342.2	113145	143984	135714	85403.5	113536	176485	193200	113397	121555	143288	185840	94155.3	130485	145168	68185.2
374.548055090255/5.292	275024	377697	209936	136295	130747	554226	256433	54661.7	447655	308530	183364	110793	79912	141856	60143.3	210653	312177	71017.1	91165.3	171200	690907	257027	369278	308948	280163	268390	356447	446496	556753	277206
827.403162180156/14.1133333333333	386444	215746	0	0	5027.03	98949.3	47894.2	0	341901	413126	0	0	0	0	0	338500	766238	0	0	0	620577	436123	350592	696408	765460	241168	459416	382677	553382	313351
369.158000848448/5.633	232316	205542	112079	155088	264869	236680	199538	245492	198326	291835	225489	346011	166308	260379	289705	538041	432595	393464	199368	240585	78897.2	191178	184817	167386	147153	140118	115247	167866	149135	76886.9
267.134370849111/4.65	151424	97560	124820	90136.3	73365.4	104530	71062.4	157666	75474	175310	247128	126782	89772.4	310334	65076	138027	147885	225078	59193.3	135965	112576	89619.1	45222.7	23708.6	15922.2	25665.6	25057.2	64386	22775.5	5356.16
463.304408064791/18.94675	206911	204858	199992	201276	176946	167355	158306	189442	162927	188919	226424	230710	223092	235769	229212	224936	194551	250830	251105	35733.7	221070	183780	181661	185286	203179	171792	166077	161074	163503	166052
214.126304546497/2.05216666666667	312494	392259	165484	123003	150871	204227	120762	188531	103388	275214	224472	160607	99857.6	268598	95156.2	243014	184033	292083	123924	347237	216638	245662	184365	108800	96034.7	141632	131924	212252	149905	73373.2
615.175235551769/1.867	0	170073	29690.1	332578	98928.2	237767	171178	0	194726	18924.8	0	29734.7	80794.1	0	80955.7	46621.1	57166	0	20215.3	0	150287	16340.7	174163	171415	199754	79698.1	146715	42524	104213	170257
431.424056216786/6.435	148717	156849	316096	164806	175294	145021	166252	491039	134339	94261.1	99168.9	5431.58	81814.3	57408.8	16241.5	0	0	18686	118048	71718.5	108329	151269	64520.8	69738.3	59298.6	98854.5	98784.9	140487	128357	64664.4
790.541751323945/22.2818333333333	0	0	0	385505	264287	1.00243e+06	172786	589009	213102	1.57713e+06	0	413549	326032	0	199457	148486	281486	0	0	0	0	0	0	1.2534e+06	1.57025e+06	463119	559179	391089	298295	82290.5
365.193020646066/5.51733333333333	294430	231389	93317.9	145509	279438	519632	309802	336757	289923	483786	459541	245550	187700	358437	152306	315738	718310	454666	134283	296181	128783	116828	89806.3	120619	107931	133823	85481.7	120102	75210.1	35545.6
472.303784661638/12.9048333333333	191958	151992	91305.6	162040	196878	98578.1	137923	300322	172905	214836	214911	163688	119787	282370	155719	150816	181474	253544	219129	258867	102108	200970	150899	136216	160164	262952	207123	286820	129320	139811
206.048111957084/5.683	222867	98100.6	184975	91552.7	175873	93498.7	114739	316569	88023	226356	250229	134138	148474	254526	146490	98419.4	94826.2	184134	125955	197113	56862.6	188467	63921.3	76203.3	74945.5	126499	71632.3	159103	95858.3	55266.9
382.088746040906/1.39525	279992	315509	154681	188529	312006	307807	213975	285548	277949	294813	269133	384853	283430	303546	287264	429180	379347	230062	236217	254404	144397	213333	197213	229166	223581	173150	114413	227896	194714	156615
329.131247115814/24.6255833333333	218310	267279	0	240879	265009	256702	221884	181779	250090	231964	322667	207719	232407	302992	265122	184385	220335	76644.4	420387	276972	32999.9	19497.8	34123.4	179843	194931	190804	199874	168335	181233	255126
616.161084266684/2.15716666666667	81256.9	275885	119443	259879	328782	340880	232171	92807.8	196630	75738.3	114062	225338	335823	0	327121	301889	352846	41629.3	411397	69863.2	283998	377194	358923	328284	319990	334276	382763	371333	329722	324314
433.243892435742/6.63641666666667	95255.9	82301.2	59852.4	64943.6	96975.9	119263	215046	162168	193698	245619	289569	272784	77935.1	186983	92688	167092	252955	171732	126050	136894	48021.8	33112.3	47668.8	23994.2	39525.8	62139.6	79574.5	56558.6	36742.7	47117
493.148586956664/5.19925	148693	153735	170326	165168	180494	116122	126985	104293	113416	96799.2	92631.3	117393	167939	95838.2	138877	83818.4	78095	64129.5	125084	114155	104368	91254.9	139624	134150	158425	176440	133567	105185	124973	112737
371.328239927819/13.8859166666667	117972	86303.9	259253	159648	143408	72405.5	74180.8	135520	64908.2	191072	210996	295636	232988	257498	298734	213469	149640	161601	113933	154878	41873.1	35156	41947.7	62366.1	39441.9	43448.4	43554.6	54606.1	46975	21647.7
283.263369752774/22.9823333333333	998941	519133	367503	0	80781.1	0	68733.1	84708.2	74230.6	40437.6	0	0	86310.5	0	57341.9	34903.1	29469.6	506238	284756	0	691853	544926	481439	0	0	90200.2	79432.4	110380	66349	78909
518.324031736068/14.8011666666667	387561	281018	309229	294273	311264	157929	175050	235968	150722	302305	17204.4	5411.18	58637.4	0	152322	98601.8	260754	143758	43599.6	15706.7	267343	189886	191808	178406	273016	456029	128074	171927	187695	80825
263.139371921963/6.6485	757960	905916	305123	324028	338520	434460	370145	258992	404878	501285	256216	485455	301990	558211	222188	673953	550807	569552	167704	589278	621702	320453	267232	179102	267104	185811	313707	388995	245172	174760
215.138864218738/4.68258333333333	770883	599000	223456	213697	261387	338899	231871	224104	261302	407357	269633	256419	177991	529126	156595	326156	242495	374029	170964	547712	385929	380009	247609	176906	145334	251531	201344	369919	256422	141305
586.336274622422/15.73	269515	206305	381154	245070	434717	199689	221366	774444	229848	309303	164559	122224	419544	219866	140295	156432	251171	143550	140344	194391	311769	194565	156550	298271	328462	308670	179723	162436	183999	143150
453.675827242642/8.45025	68951.1	106032	105152	108141	121736	78073	82939.8	100963	81938	109446	121271	116053	90592	108748	128461	105358	74908.5	80217.8	96339.1	212699	130255	111897	115544	171161	95391.4	233592	122088	146745	25123.3	103923
307.25473214644/21.34	197022	159269	243387	404689	0	0	100948	119360	66890.5	117258	131985	95178.4	120262	138642	97316.3	82461.8	63714.1	189227	81951.7	278381	189302	184413	144319	357010	100122	101640	69335.8	73714.7	77622.2	57786.3
224.074095619269/7.29925	70464.3	78860	154990	104107	87738	79025.7	78351.8	86411.6	63977.4	124803	107260	272774	143294	202794	151574	173854	157490	123637	71346.1	88793.6	62752.2	52098.8	85525.8	59828.6	42624	48080.4	69057.2	71967.3	76414.1	37898.1
204.123170865226/1.83433333333333	61084.7	55313.1	34679.9	65938.3	38637.8	82276.6	72196.9	207380	116162	29502.6	41552.1	66078	44702.8	23347.9	65515.9	38671.9	63983.5	57825.3	38812.9	37212.4	1.01692e+06	172208	81342.8	68697.1	52401.1	58872.5	55657.9	53730.1	66038.2	76229.5
250.038215702461/5.09908333333333	183633	89951.3	180799	78407.9	193911	81663.6	59195.8	217780	53079	216121	218760	187934	101622	412480	226634	137996	111304	305557	476675	227579	45033.8	84321.2	61079.6	26475.6	27920.2	62734.9	50408.2	115687	42603.1	32347.9
123.055446128185/4.51475	724602	872579	1.57519e+06	1.20964e+06	1.28096e+06	1.51011e+06	1.14853e+06	1.03682e+06	1.59634e+06	1.0701e+06	1.36063e+06	1.30186e+06	1.35976e+06	1.15611e+06	1.52977e+06	1.07064e+06	1.23216e+06	614330	1.30162e+06	1.11147e+06	746756	932915	1.17966e+06	1.21907e+06	1.3456e+06	1.19644e+06	1.51246e+06	1.11126e+06	861594	1.47525e+06
268.10413644137/3.51966666666667	323515	316990	315209	250248	527793	145041	68832.4	612857	149190	596652	480275	288250	310355	493189	401838	229144	202950	138524	521129	343873	262254	169394	190253	77661.5	244637	141243	175466	47757.9	118722	165952
271.232854728176/21.389	643280	569062	429719	0	0	169429	92386.6	129218	120299	91720.6	0	0	386960	0	463582	528017	614520	336379	440368	0	616300	417601	376862	0	0	151967	90136.5	28548	48776.2	19662.3
554.325274598818/15.64825	91379	67076.2	78113.3	103579	113272	97660.2	90716.7	59142.9	70658.8	45835.2	157316	100471	178026	90926.2	126154	134063	158074	103209	79124.5	137301	104000	120218	63448.5	78012	133022	126216	76089.4	113171	125806	70299.8
256.236524344843/21.1098333333333	389184	232541	418873	0	0	45783.3	159566	134222	123490	369431	0	0	135271	0	76154.8	104112	88477.8	242945	68260.3	0	302483	441652	195818	0	67374.5	253977	146769	136697	216128	135054
792.555477251194/24.5890833333333	31160.3	0	0	24946.3	79327.1	33602	609060	933710	744612	943519	0	103704	273123	315132	344590	138090	446336	0	222570	0	0	0	27398	0	232026	536481	524184	482988	371216	632319
262.147525222512/10.452	97804.5	176083	114753	101271	95075.8	155302	96749.8	34345.1	76770.2	48130.5	67152.6	60823.5	235203	40706.3	102773	127569	58126.5	33277.4	39015.9	51727.5	134723	75474.2	65972.3	162567	126027	161929	110521	108096	140988	72565.8
278.160523279128/4.53666666666667	235354	237946	312922	342488	329836	240017	331437	492784	321338	171383	166061	0	265558	65372.7	0	0	16341.3	34067.9	301503	117446	260591	269478	67805.8	260746	304880	333346	235703	374820	273520	327252
124.056459596803/2.12866666666667	125958	157641	113449	171731	188075	144583	20991.3	67748.3	165623	109062	163289	193573	151255	111370	149202	192042	339448	142638	205767	139920	197259	47355.7	171158	145309	186872	58461.9	137851	122810	123282	134101
274.201722917181/7.82033333333333	152994	119034	68065.4	128445	91453.1	94878.8	75241.8	42911.3	115366	108094	51060.1	75632.4	72722.7	68625.2	51173.2	132726	90634	50957.6	49967.5	85176	165161	76551.9	90678.4	151053	87251.1	143277	99411.8	120556	62772	61084.7
709.520228795998/8.66725	66980.1	103060	114740	115779	115960	61425.4	85451.7	111531	73339.3	122707	133135	139360	103176	117687	160857	123933	77347.6	0	95371.2	204783	136059	112564	111247	165017	95398.8	201080	117468	140868	119088	102710
649.357086861647/6.635	68929.9	68256.5	43121.2	55865.7	77671.2	81279.7	166692	115103	132434	187616	311054	323341	95636.2	168412	102719	133990	244858	147043	123469	118744	29076.7	37558.5	44134	18910.8	53979.7	64440.5	59372.9	77527.1	43316.6	71517.5
348.309744050327/21.606	512890	411138	474273	0	37151.6	0	43330.8	55286.5	30825	45488	0	5351.87	67060.3	0	182149	110555	54188.8	688843	461547	0	398824	389049	256503	0	0	24746	24907.3	25472.8	24986.3	30476.9
660.292280128916/21.54	356856	240326	179106	0	0	0	29244.1	42957.7	26588.6	76670.4	0	0	52111.1	0	147945	80682.8	139314	211184	147874	0	437470	603404	345326	0	0	144967	42913.1	51653.4	75156.4	60728.8
204.086109017977/1.282	93133.8	180852	165319	193672	90021.6	214032	185686	154854	168385	55213.2	166917	162770	189933	134152	178188	118310	159454	132265	155633	132736	1.19272e+06	220905	135103	29283.2	138925	120887	113309	132861	121858	81365.1
291.120844902732/1.221	146293	230691	35965.3	109186	153858	226736	180470	93704.7	218842	166939	151833	51423.1	97137	34039.9	134724	280047	278460	148657	169692	124168	124900	53607.9	135558	149269	169374	128122	140673	137299	101410	28588.4
948.652022645898/10.84575	70472.7	76963.3	60305	131081	307542	0	98779.1	174260	111775	279194	101063	156620	153257	70320.3	145677	142466	129610	115052	178480	90037.1	82183.8	10925.9	81569	76139.8	106955	205131	123920	177032	53373.8	51558.7
636.395200588702/15.206	119643	94622.4	165827	91776.4	92345.1	81237	96302.8	132737	78535.7	126725	92064.4	130289	101541	143064	105509	105545	67594	99838.2	69600.2	52430	67756.9	109399	88044.5	106257	67639.8	105155	65739.2	78960.7	57391	39836
348.072296678696/1.23383333333333	70693.6	100175	98134.3	172467	192593	150299	135803	157918	89096.1	98228.1	199002	262398	143111	244386	272926	198857	143408	257792	254228	220364	25815.4	25157.5	42635.4	32027.8	40755.9	23631.5	23408.9	34911.4	21972.1	19779.8
768.554315877924/24.5004166666667	0	0	1.2081e+06	166983	170280	256178	294553	292646	292312	331129	85827.9	353838	54951.9	321924	598576	125494	299420	0	0	37081.4	0	0	241390	168841	138326	317074	307414	298071	281437	343010
734.305057572638/5.66716666666667	130070	128265	127657	79751	135455	158846	51519.5	437174	74515.3	152989	218323	176107	37306.2	277105	93469.7	154415	111885	249351	260452	231185	64948.3	54448.5	112353	43438.9	31880.7	25116.9	77328.3	73231.9	65159.7	64001.9
277.118660416697/8.201	118161	110558	65813.1	74983.1	62313	175803	53512.3	103780	113913	125636	64956.5	138667	43904.7	80520.8	85059.9	187849	229431	74033	57208.2	38967.4	99218	120360	130572	89942.8	87567.1	54419.1	76404	104503	75947.4	67929.8
615.159488146158/2.53291666666667	505710	191234	228379	1.11325e+06	499666	447318	538900	0	1.02635e+06	346059	0	211183	159916	0	202518	275659	483163	558753	961449	0	128292	70963.6	89188.3	75918.1	107748	190275	328911	0	0	0
370.772418281892/8.06566666666667	62190.4	99426.8	88407.2	90134.2	103911	56541.7	77906.5	96982.3	65180.9	105028	100074	88215.1	67323.5	92855.4	102766	85448.8	64182.4	0	88142.9	179442	119800	99335.6	91630.8	150453	75544.6	188631	106372	127104	113868	88894.7
356.086076787258/1.14941666666667	93339.7	90220.3	34581.1	65520.8	110770	123215	65392.2	73931.9	89021.1	132981	88644	107909	60505.7	89335.4	97860.3	207255	210913	140108	115194	76162.7	55951.1	73595.8	80294.5	78533.8	90647.6	68065.8	68631.6	83595.2	71827.6	50451.6
308.584421361761/2.1335	36823.9	158048	15031.6	39829.8	50135.7	44510	188425	72081.9	69134.5	85930.9	71950.5	70886	269670	0	123984	28717.6	115913	0	381030	73109.7	222781	367673	273160	370968	520180	448272	444907	379692	344983	406805
329.199656085609/5.71533333333333	39108.7	48776.6	85831.4	67253.7	78663.5	87876.9	211090	71409.3	216604	179200	249231	247847	156237	222064	102680	191476	328569	147808	98035.9	166201	31011	38341.5	23646.7	11427.1	20903.6	37804.4	32316.6	31587.7	24202.5	31618
119.049354802287/1.57683333333333	458141	503456	579589	466312	485399	523314	438908	221672	348953	549699	199661	228512	498878	692588	527976	611251	529660	335346	397754	504693	341003	272768	468640	370317	341155	258712	356042	433066	394864	309650
691.361340955275/15.1771666666667	247753	87496.3	81908.9	153628	103353	72974.8	155809	153226	177246	133108	93662.6	151576	289779	87885.3	218871	372104	386367	268543	168095	350417	152437	116347	121145	174552	228482	176374	128539	95140.6	168789	69107.2
533.32502142939/9.88533333333333	223710	277761	170819	230816	472672	348551	245126	281949	279767	178746	46903.2	171720	138888	54702.9	153418	127169	96950.8	59173.4	94336.7	25916.6	241280	0	82727	44606.8	125110	311773	183799	150192	25313.4	98779.3
733.558473720244/24.572	0	0	0	10769.2	1.31029e+06	914676	651982	580073	464748	307204	178870	32766.6	24792.1	535738	148602	269574	40363.3	0	0	139074	0	0	0	22879.4	914341	395938	384948	469738	309406	426819
476.32758366921/7.26675	57702.9	166120	130702	52515.6	143657	60176	45911.6	173286	54098.6	187892	142435	59941.6	49796.1	157995	155802	43430.3	36227.5	64735.1	134226	111790	69018.4	121771	51917.7	174318	59204.4	248085	61271.8	231226	157104	81707.8
530.319232554679/15.7628333333333	170153	149382	295523	259085	112998	102155	137143	144956	60851.1	84254.6	106565	147227	321411	104779	147836	159100	203671	113764	116296	220179	242439	146429	123299	186729	265347	163499	113963	97889.2	170848	105527
279.17076346471/7.23408333333333	234095	144504	264292	145806	139963	186611	148214	180468	160549	303825	269830	385459	149454	469623	191847	315522	325126	269358	137546	179592	154592	104506	165761	74221	57471.5	59045.7	106883	95144.8	70828.7	59322.3
450.163018249954/4.7325	158979	126337	133005	114346	127714	134123	63995.3	153707	69537.1	119144	144499	191788	80389	313091	137964	244056	149207	165705	81898.6	137382	133314	98238.9	159929	81521.8	43945.2	38277.9	67794.6	35653.5	46237.9	33857.1
274.092448905869/1.91725	83551.8	76186.1	50611.2	61017.9	155756	155850	163328	127450	150084	278192	192784	356261	197082	259008	279483	477532	408890	212435	217176	182047	28081.8	56994.3	57929.6	60271.4	69299.1	58578.5	61367.2	115729	77263.4	48608.1
186.156272289/14.2053333333333	87712.7	51630.3	231411	80584.8	245975	263312	61914.2	140088	119784	274686	51364.1	84849.8	106825	108165	160717	85526.2	35338.1	283709	105449	291755	38462.4	80050.5	75143.5	80792.9	112571	80941.2	74237	62371.9	73103.5	108835
975.641979340158/16.245	126615	121407	761786	272502	90231.8	59879	62660.9	263018	94251.9	91238.3	45958.2	21439	851531	63312.2	41931.6	41656.7	132782	61479.7	58252.5	30362	145424	58216.3	72417.5	115941	120821	93336.8	53403.8	55864	59605.8	76112
250.093244094012/4.875	72123	81462.2	71194.8	118598	124000	123157	76279	94231.3	118803	147294	117216	178348	149364	158501	220132	105549	97120.7	86844.2	142733	194331	62492.8	0	56978.5	61707.7	63797.3	74784.4	54908.1	44724.1	42139.3	74751.8
530.357777949873/17.271	320440	168124	460633	208649	250949	158658	144809	422497	168809	362667	188768	97496.1	103241	251775	96565.9	94055.4	71017.7	185434	113543	80332.1	245324	227390	171155	101446	65829.3	93264.1	115450	170596	98314.5	77274.1
292.105229784458/1.23233333333333	99148.7	149058	44841.8	102973	130941	151831	130415	71510.2	169343	175899	102287	143972	74292.7	99748.5	160937	223354	194677	176684	161775	135043	66935.2	84892.7	98028.8	107944	110481	75634.4	119263	103059	84660.1	87484.3
483.298105331052/11.4011666666667	187865	223698	79894.8	160291	172439	112538	201898	712513	179950	38639.4	201124	124879	71743.8	528437	96529.6	95208.6	164583	313872	171578	222245	0	170328	0	0	7321.77	277872	139132	221432	32005	65215.6
355.285867241122/21.8925	171975	204205	433808	0	0	0	108729	39445.3	70421.9	47392	0	0	513431	0	308827	194976	132189	260661	344803	0	182155	93598.9	116992	0	0	84489	47184.6	38572.9	56301.7	20993.1
835.604480350681/24.5785	0	0	0	0	32116.7	121911	585943	663644	669961	656389	0	1.01371e+06	776852	85866.4	133665	87448.1	730573	0	0	0	0	0	0	0	32297	797904	599785	422095	754694	651357
855.571102501207/20.532	0	0	0	12144.9	992593	270282	184564	266299	166337	583057	221306	165929	383832	247529	0	98952.5	247999	0	0	711906	0	0	0	23909.3	75511.2	229571	194140	140283	212078	155652
586.924711599572/7.85116666666667	87234.2	84742.3	97966.6	82065.2	86807.5	61283.8	62649.7	84565	65135.2	78880.7	51938.1	57031.7	56076.8	47596.8	66124.1	51578.3	44476.3	39740.9	58992.3	81347.4	130804	115431	117652	147436	106108	170092	128248	106942	125077	94948.1
657.254526008243/24.6315	191231	225287	0	193780	210540	212737	176688	153113	199552	186519	247906	173447	189103	254122	227571	166226	182072	180306	315826	236161	51705.1	31335.1	41879.6	156096	157916	155868	171391	47096.4	162847	212682
137.076327394542/1.57341666666667	286091	305012	542002	459427	502696	432079	428805	539404	394333	521633	278425	145178	255012	623673	268355	577792	457005	198279	378097	499453	377529	323491	452842	379258	336380	339884	358013	413536	374002	288976
384.30943358538/20.173	200390	172374	286273	211778	0	82290.6	83801.9	126889	73093.7	191828	40172.8	36481.3	285430	52169.6	414963	215846	156096	185052	26517.2	0	72589.8	66222.8	88896.2	78363.2	35665.4	59762.6	44269.8	35646.6	42841.4	33875.6
292.723530721826/6.97566666666667	81057	93485.9	87476.5	59751.5	116687	82388.1	43510.3	100728	68926.3	108134	107810	69852.7	84499.5	92887.1	108573	54144.4	71946.4	101290	82557.4	168609	74675	103783	62832.8	150397	94574.9	204276	72076.7	132972	125099	102875
339.289808123723/22.0233333333333	951610	245233	296256	29095.7	0	0	42959	365349	44438.5	237420	0	0	42505.9	0	30200.6	0	0	433154	119135	0	610179	442909	430601	15611.1	0	74797.5	36829	78083	82660.1	36038.7
401.804797317371/8.2005	77090.8	92029.2	98326.1	91143.9	105623	59944.6	54687.8	105474	63131.1	123272	125519	112393	67829.1	93990.5	123269	75646.5	55973	71935.2	71143.9	217431	127250	97154.8	111969	187932	78628.6	220819	102408	118732	118394	93238.9
803.53991811302/24.3425	0	0	857803	351514	325116	418432	51235.8	52041.1	83633.8	57344.9	0	243683	131593	159575	71090.8	162229	168210	0	174198	214145	0	29313.5	1.01627e+06	168183	394266	86619.5	329681	147361	126368	173148
[truncated: 1,519 more rows]

## Sheet: Liver Negative
The dataset of the liver samples from hamster in negative mode.
[truncated: 1,518 more rows]
